# Author Index

- Aakhus, S., P3865, 5224, P5606  
 Aamot, I.L., P3802, P5707  
 Aarones, M., P5606  
 Aarsaether, E.J., P3884  
 Aasa, M., P2979  
 Aasberg, S., 149, P5428, P5429, P5497  
 Aase, S.A., 2049  
 Aass, H., P5606  
 Abadir, S., P506, P2377, P2379  
 Aban, I., 5045  
 Abbadessa, F., P4085  
 Abbate, A., P812, 1154, P2124, P3232, P3367, 5054  
 Abbate, R., 155, P1325, P1592, P3331, P5472, P5499, P5536  
 Abd El Kader, M., P2387, P4558  
 Abd El Moniem, H., P2387, P4558  
 Abd Elrhman, M., P2500  
 Abdallah, C., P3119  
 Abdallah, Y., 1243, P1394, P1404  
 Abdel-Aziz, K., P3906  
 Abdel-Kader, S.S., P3880  
 Abdel-Massih, T., P4863  
 Abdel-Rahman, S., P4570  
 Abdel-Wahab, M., 5202  
 Abdelaal, A., P1645, P3314, P4170, 5213  
 Abdelmassih, T., P4857  
 Abdelmoneim, S., P3880  
 Abdelnoor, M., P1468, 5154  
 Abdessalem, S., P5259  
 Abdo, J., P4857  
 Abdul-Jawad Altisent, O., P4089  
 Abdullahi Said, A., P5536  
 Abe, M., P4754  
 Abe, S., P3904, P4921  
 Abecasis, J., P3227, P3888, P5281, P5357  
 Abecasis, J.A., 5243  
 Abecasis, M., P2320, 5243  
 Abenheim, L., P5722  
 Aberle, L.H., P686  
 Abi-Gerges, N., P575  
 Abid, D., P2353  
 Abid, L., P2353  
 Abidstrom, S.Z.A., P1440  
 Abignano, G., P5343  
 Abildgaard, U., P1556, 4991, 5206  
 Abildstrom, S.Z., P2114, P2117, P2299, P2942, P4684  
 Abilstroem, S.Z., P1439  
 Abitbol, J.L., P4491  
 Abizaid, A., 2923  
 Ablasser, K., P4531  
 Aboal, J., P2298  
 Aboal Vinas, J., P3854  
 Aboujaoude, S., P4857  
 Abozguia, K., P1459, P1561, P2494, P4471, P4880, P4883, P4885  
 Abraham, N.G., P2475  
 Abraham, P., P3343  
 Abraham, W.T., 237, 238, P5604  
 Abramczuk, E., P4125  
 Abrams, D., P2450  
 Abrams, K.R., P661  
 Abramson, M., P5687  
 Abreu, A., P614  
 Abreu-Gonzalez, P., P4912  
 Abu Samra, A., 1822  
 Abubakar, M., P1576  
 Abugattas, J.P., P596  
 Abugattas De Torres, J.P., P641  
 Abukareh, R., P1300  
 Acar, C., P2316  
 Acar, E., P5598  
 Acar, G., P4192  
 Acar, P., P506, 5176  
 Accardo, A., P5681  
 Accassat, S., P698  
 Accorsi, T.A.D., P4091  
 Achenbach, S., P1358, P4564  
 Achilli, A., 1899  
 Achilli, F., 336  
 Achouh, P., P2316  
 Acikgoz, S.K., P832  
 Ackermann, F., P4659  
 Acquafresca, M., P3023  
 Aczel, S., P2270  
 Adalet, K., 3568  
 Adam, D., P5360  
 Adam, O., P568, 3658  
 Adam, Z., P5284  
 Adamczyk, T., P5321  
 Adamkova, R., P425  
 Adamkova, V., P5494  
 Adamopoulos, D., P867, P1437, P2527  
 Adamopoulos, S., P1700, P2947, P3251  
 Adamopoulou, E., P2986  
 Adams, M.R., P726  
 Adams, R.H., 1244  
 Adams, V., P1343, P1411, P1583, P1677, P2480, P2944, P2950, P2951, P2956, 3528, P4690, 4959, 4963, 4964, 4966, 4972, 5058  
 Adamu, U., P2125  
 Adamyan, K.G., P2498, P4242, P4842, 5048, 5103  
 Adaniya, M.E., P4096, P4097  
 Addad, F., P1326, P4042  
 Addicks, K., P1447  
 Adenike, M., P2190  
 Adersson, A., P5556  
 Ades, L.C., P5543  
 Adgey, A.A.J., 253, P4159, P5434  
 Adigopula, S., P2309  
 Adjei-Poku, Y., P1638, P4830, P4831, P4866  
 Adlbrecht, C., P724, P828, P1613, 1901, P2101, P4216, P4224, P5282  
 Adler, Y., 3545, P5571  
 Adlerstein, D., P537, P3237  
 Adlova, R., P3219  
 Admon, D., P4236, P4246  
 Adolf, D., P4186  
 Adragao, P., P611, P1640, P1642, P2453, P2454, P2463, P3321  
 Affara, N., P1595  
 Affatato, A., P3830  
 Afsharzada, F., P1344  
 Afxantidis, J., P4491  
 Afzal, R., 1103  
 Agabiti, N., P1719  
 Agabiti Rosei, C., P559, P862, P4910, P4927, P4939  
 Agabiti Rosei, E., P549, P559, P862, P4910, P4927, P4939  
 Agabiti-Rosei, C., P3110  
 Agardh, H., P4608  
 Agazio, A., P827  
 Ageev, F., P4544  
 Agelis, A., P869  
 Agewall, S., P4617, 5083  
 Aggeli, C., P1292, P2532, P3044, P4907, P5341, P5345, P5346, P5351  
 Aggelidis, G., P4702  
 Aggelis, A., P468, P473, P551, P625, P638, P859, 3536, P4686, P5345, P5346, P5533  
 Aggelopoulos, P., P468, P4217, P5298, P5667, P5703  
 Aggio, S., P795  
 Aggiusti, C., P862, P4910, P4927, P4939  
 Agha, H., P2374  
 Agha, S.A., P4222  
 Aghamohammadzadeh, R., P2400, 2865  
 Aglan, I., P1350  
 Agmon, Y., 338, P5689  
 Agnelli, G., 5186  
 Agosti, V., 2916  
 Agoston, G., P513  
 Agostoni, P., P2948, P3191, P4047, P4710, P5694  
 Agostoni, P.G., P1356, P1357  
 Agouri, S., P2222  
 Agrawal, A., P5539  
 Agren, S., 127  
 Agricola, E., 5130, P5645  
 Agrusta, M., P1265, P1703  
 Agüero, M.A., P3037  
 Aguiar, C., 1960  
 Aguiar, C.T., P1728  
 Aguilár, R., P504, P731, P5355  
 Aguilár, R.J., P5353  
 Aguilár Torres, R., P4089  
 Agullo, E., P4485  
 Aherrahrou, Z., 380  
 Ahmad, R.A., 5152  
 Ahmad, R.A.S., P1504  
 Ahmad-Nejad, P., P4870  
 Ahmadi, R., P494  
 Ahmed, A., P4203, 5045  
 Ahmed, F.U., P5449  
 Ahmed, I., P1459, P1561, P2494, P4471, P4880, P4883, P4885  
 Ahmed, M.S., P1410, P1414  
 Ahmed, N., P4645  
 Ahmed, S., P2432, P4185  
 Ahn, S.J., P2289  
 Ahn, T.H., P1515, P4535, P5400  
 Ahn, Y., P543, P3093, 3560, 4988  
 Ahn, Y.G., P2993, P5358  
 Ahn, Y.K., P2436, P2982, P2992, P4152  
 Ahn, Y.K.A., 1111  
 Ai, T., P784  
 Aiach, M., P4849  
 Aidonidis, G., P4750  
 Airaksinen, K.E.J., P682, P2438  
 Airan, B., P3086  
 Aissaoui, N., P4190  
 Ait-Ali, L., P2381, P4788, 5160, P5547  
 Aizawa, T., P480, P652, P656, 2925  
 Ajani, A.E., 4951, P5481  
 Ajjan, R.A., P2102, P2104, 5118  
 Ajmone Marsan, N., P1705, P2157, P3873, P3876, P4102, P4546, 5094, 5125, P5642  
 Akagami, T., P1421  
 Akagi, S., P1514  
 Akaike, M., P1558, P4538, 4957  
 Akaishi, M., 5000  
 Akao, H., P4629  
 Akao, M., P4754  
 Akar, F.G., P4487  
 Akar Bayram, N., P5319  
 Akasaka, T., P469, 900, P1278, P1304, 3561, 3566, P4052, P4467, P4472  
 Akashi, Y., P612, P3290, P4756  
 Akcakoyun, M., P3326  
 Akcay, A., P4192  
 Akcay, M., P5319  
 Akgun, T., P1600, P1605, 2770  
 Akhmedov, A., 384, P3944, P3947, P5386, P5418  
 Akhter, N., P2394  
 Akhyari, P., P2308, P3079  
 Akiho, C.A., P4699  
 Akin, I., P547, P646, P666  
 Akinina, S.A., P2302  
 Akishita, M., P2248, P3950  
 Akita, G., P1689  
 Akiyama, D., P3036, P3301  
 Akiyoshi, T., P2248  
 Akiyu, J.P., P5377  
 Akizawa, T., 5000  
 Akkaya, E., P3182, P3195  
 Akoum, N., P1638, P4819, P4831, P4866  
 Akpinar, I., P3319  
 Akram, S.A., P3962  
 Akre, H., P5678  
 Al Hiti, H., P729  
 Al Jufan, M., P2376

- Al-Allaf, K., P2273  
 Al-Amin, A.M., P2147  
 Al-Attar, N., P4131, 5155  
 Al-Mallah, M., 1822  
 Al-Masri, A., 1241  
 Al-Mohammad, A., P4586  
 Al-Mousa, E., P5253  
 Alados Arboledas, P., P2306  
 Alahmar, A., P1532  
 Alahmar, A.E., P4041  
 Alam, M., 2045, P2146, P3350  
 Alam, S., 1955, P2118  
 Alasady, M., 1920, P5560  
 Alatwi, N., P1423  
 Alazab, A., P798  
 Albayrak, E.S., P4268  
 Alber, H., P4662  
 Alber, H.F., P4626  
 Alberca, I., 1953  
 Alberola, A., P606  
 Albert, C.M., P5445  
 Albert, F., P2112, 4989  
 Albert, X., P3854  
 Albertsen, A.E., 1921  
 Albertsson, P., P648, P1741, P3223  
 Albin, G., P809  
 Albrecht, A., P4706  
 Albuquerque, A., P4915  
 Alcalai, A., P4260  
 Alcock, R., P677  
 Alconero Camarero, A.R., 5013, 5016  
 Aldama Lopez, G., P641, P1499, P1500, P3186  
 Aldama-Lopez, G., P2980, P5285  
 Aldegheri, M.P., 1104  
 Alderighi, M., 1245, P2198  
 Aldrovandi, A., P3016  
 Alegria, E., 883, P2272  
 Aleil, B., P2090  
 Aleixo, A., P877, P1538, P3888, P4941, P5357  
 Alekou, Z., P5662  
 Aleksic, A.A., P2970  
 Aleksova, A., P3272  
 Alemanni, R., P794  
 Alemdar, R., P4268  
 Alencar, M.C.N., P4906  
 Aleong, G., P4737  
 Alessi, M.C., 5117, 5119  
 Alexaki, E., P2534  
 Alexander, J.A., P686  
 Alexander Battler, A.B., P1550  
 Alexanderson, E., 391  
 Alexandrescu, C., P852  
 Alexandridis, E., P2144  
 Alexi-Meskishvili, V., P4809, P4812  
 Alexiou, K., P732  
 Alexopoulos, D., P1663, P2138  
 Alexopoulos, N., P638, P1529, P3919, P4265, P4571, P4936, 5086  
 Alfano, A., P5487  
 Alfano, D., P4771, P4781, P4785, 5181  
 Alfieri, O., P4130, P4144, 5156  
 Alfonso, F., P1316, P1543, P4737, 4958  
 Alfonso Manterola, F., P4734  
 Algra, A., P5440  
 Alhaddad, I., P5253  
 Alhous, H., P804  
 Ali, A., P4611  
 Ali, H.M., P4586  
 Ali, I., P2523  
 Aligiannis, N., P2492  
 Alioglu, E., P418, P1369, P4701  
 Aliot, E., P2329, P3336, P4083, 5213  
 Aliot, E.A., P4110  
 Aliprandi-Costa, B., P677  
 Alissa, R., P1309  
 Alitalo, K., P2192  
 Alivizatos, P.A., P2947  
 Alizadeh, L., P516  
 Alkholi, A.A., P4119  
 Allaart, C.P., P495, P1344, P5632  
 Allal, J., 5149  
 Allemann, H., P1496  
 Allemann, Y., 389, P738, 976  
 Allen, B., P2193  
 Allen, D., 147  
 Allen, E., P1444  
 Allesie, M., P568  
 Allesie, M.A., P623  
 Allman, C., P2139  
 Allman, R.M., 5045  
 Allocca, F., P5343  
 Allocca, G., 1924, P4146, P4151  
 Almany, S., 3653  
 Almeida, A.G., P746, P4579  
 Almeida, A.M.G., P3270  
 Almeida, A.R., P2403, P5344  
 Almeida, J., P2491, P4530  
 Almeida, M., P837, P1456, P3227, P5281  
 Almeida, R., P2317  
 Almeida, S., P2403, P2453, P2454, P2463, P5344  
 Almendral, J., 2773, P3342, 5011, 5102  
 Almeria, C., P491, P492, P2304, P2397, P2401, P3039, P4183, P5329  
 Almirante, B., P3795, P4111  
 Almpanis, G., P2138  
 Almroth, H., 2784  
 Alonsa Gonzalez, R., P2386  
 Alonso, J., 3661  
 Alonso, M., P5454  
 Alonso Briales, J.H., P4734  
 Alonso Rodriguez, D., P1378  
 Alonso-Gonzalez, R., P4765  
 Alonso-Pulpon, L., P773, 3656  
 Aloui, H., P2329, P4083  
 Alp, N.J., P4868  
 Alpendurada, F., P3269, P3285, 4973  
 Alsov, S., P5601  
 Altendorf, R., P5498  
 Altenhofen, L., P2971  
 Alter, P., P4889  
 Althoff, T.F., P2099  
 Altieri, P., P4628  
 Altimir, S., P3167, P4231  
 Altin, T., P2225  
 Altiok, E., P3882  
 Altmann, D., 5126  
 Altmann, D.A., P4855  
 Alunni, G., P3348  
 Alvares Pereira, M., 1149, P3002, 4977  
 Alvarez Garcia, N., P596  
 Alvear-Garcia, J., P5530  
 Alves, A.C., P2276, P2297  
 Alves, D.J., P5420  
 Alves, M.J.N.N., P4025  
 Alves, S., P5600  
 Alwi, S.A.R.S., P3109  
 Alzueta, J., P1662, 5128  
 Amabile, N., P1346  
 Amador, C., P4718, 5192, 5198  
 Amador, P., P3861, P3864  
 Amandels, S., P615, 4967  
 Amano, H., P1520, P4065  
 Amanovic, I., P5385  
 Amara, W., P3340  
 Amat, I., P3051, P3185  
 Amato, M., P3160  
 Amatruda, N., P3061  
 Ambegaonkar, B., P2250  
 Ambrosetti, M., P580, P4835  
 Ambrosio, G., P519, P2207, P3348, P4482, P4526, P4688  
 Ambroz, D., P720  
 Ambroziak, M., P3925  
 Ameida, A., P736  
 Ameri, P., P5669  
 Ames, R., P1479  
 Amin, A., P5686  
 Amin, H., P1670  
 Amino, M., P4180  
 Amlie, J., 2774  
 Amlie, J.P., 1116, P3306, P5366  
 Ammann, P., P3824  
 Ammar, S., P1669, P3289, P3293  
 Ammer, M., P1722  
 Ammirati, E., P4675, P5317  
 Ammon, K., P2524  
 Amnueypol, M., P3335  
 Amorim, P., P842  
 Amoros, I., P579  
 Amoroso, G., P4644  
 Amosova, K.M., P1739, P2208, 4996, P5392  
 Amoureux, S., P618  
 Amouyel, P., P624, 884, 1795, P3114, 3540, P4657, P5443  
 Amragy, A.A., P4119  
 Amschler, R., P4869, P5621, P5690  
 Amundsen, B.H., P482  
 Amuzescu, B., P3046  
 Anaclerio, M., 3778  
 Anagnostopoulou, K., P2268  
 Anand, I., 1103, 2771, 5049  
 Anand, I.S., 1099  
 Anastasakis, A., P1698, P3242, P4697, P4702, P5396  
 Anazawa, T., P4630  
 Anca, I., P4271  
 Ancona, R., P751  
 Ancsin, B., P4233, P4234  
 Andelfinger, G., P5549  
 Andersen, C., 2820  
 Andersen, G.O., P1468  
 Andersen, H.R., P5290  
 Andersen, K., 978, P3135, P3144  
 Andersen, K.S., P4527  
 Andersen, L.V., P5531  
 Andersen, N.H., P2130, P4816, 5146  
 Andersen, O., P5455  
 Andersen, R., P4634  
 Andersen, S.S., P2290  
 Andersen, T.E., P4694  
 Anderson, C., 1018  
 Anderson, L.J., P5613, P5704  
 Anderson, P., P1638  
 Anderson, R.A., P3202  
 Andersson, B., P2325, 5168  
 Andersson, C., 5076  
 Andersson, S., 5081  
 Andersson, T., 2784  
 Andion, R., P3051, P3185  
 Ando, J., P5248  
 Ando, K., P1717, 1900, 2642  
 Andrade, A.C.M., P2274  
 Andrade, G., P4687  
 Andrade, M.D., 1150, P3005  
 Andraos, A.W., P798  
 Andre, P., 2678, 5115  
 Andreadou, I., P1484, P2220, P2492, P5535, P5668  
 Andreanides, E., P2149  
 Andreas, S., P4905  
 Andreasen, T., P3884  
 Andreassen, A.K., 243  
 Andreassi, M.G., P537, P2381, P3237, P3928, 5160, P5547  
 Andreini, D., P1356, P1357  
 Andrell, P., 2820  
 Andreoli, A.M., 252, P3814, P3815  
 Andretti, F., P1271  
 Andreou, I., 5044  
 Andreozzi, V., P614  
 Andres, E., 883  
 Andres, V., 377  
 Andresen, D., P1634  
 Andreu, D., P1617, P3291, P3302, P3305, P3337  
 Andrew, C., P813  
 Andrew, R., P4597  
 Andrianopoulos, N., 2647, 4951, P5481, P5687  
 Andrie, R., P563  
 Andrikou, E., 386, P607, P869, P2212, P2232, P2236, P2284, P2286, P2529, 2644, P3400, P3990, P4258, P4266, P4682, P4940, P4946, P5419, P5708  
 Andrikou, I., 164, P2212, P2224, P2232, P2236, P2286, P3410, P3923, P4253, P4256, P4266, P4928, P5419, P5708  
 Andriolo, A., P4794  
 Andronache, M., 5213  
 Andronikashvili, I.T., P620  
 Androulakis, A., P452, P1324, P4627, 4984  
 Androulakis, E., P634, P3134, P4009  
 Anello, G., P3916  
 Ang, C.K., P3109, P4539

- Ang, D., 2815  
 Ang, D.S.C., P429  
 Angalakuditi, M., 2672  
 Angel, J., P4058  
 Angel, K., P1481, P1732, P4617  
 Angeli, F., P5292  
 Angelici, L., 1099  
 Angelini, A., P2330, P4085, P5579  
 Angeloni, E., P407  
 Angeloni, L., P3156  
 Anger, T., P5569  
 Angermann, C., P5670  
 Angermann, C.E., P417, P4245, P4882, 5082  
 Angeros, O., P648  
 Angioi, M., P2329, P4083  
 Angiolillo, D.J., P1309, P1316, P1551, P2094, P4532, 4958  
 Anguita, M., P4254  
 Anguita Sanchez, M., 1951, P2305  
 Anic, A., 5066  
 Aniceto Silva, J., P611, P5281  
 Aniceto Silva, J.M., P5463  
 Anil, S., P5522  
 Anker, S., 2771  
 Anker, S.D., 239, P823, 1098, P1441, P1679, 2649, 5058  
 Ankone, M.J.K., P1502  
 Annala, A.-P., P682  
 Annoni, A., P1356, P1357  
 Ansaldi, S., P4107  
 Ansalone, G., 5062, 5063  
 Anselme, F., 5099, P5627  
 Anselmino, M., P1330  
 Anastasiadis, G., P3975  
 Antepara, N., 1955, P2118  
 Antikainen, R., P4844  
 Anton, A.I., 1953  
 Antonakopoulos, A., 5145  
 Antonakoudis, G., P2527  
 Antonarakis, S.E., P3241  
 Antonellos, N., P5668  
 Antoni, L.M., 2054  
 Antoni, M.L., P2179, P3866, 5088, P5272  
 Antoniadis, C., P466, P524, P536, 1022, 1023, P1287, P1682, P2109, P2200, P2311, P3917, P3929, P3972, P4612, P4907, P4930, 4998, 5136, P5390, P5421, P5550  
 Antoniadis, L., P1698, P3242, P4900  
 Antoniadis, A., P3936, 5144  
 Antonielli, E., P2442  
 Antonietti, M., 5099  
 Antonijevic, I., P4199  
 Antonijevic, N., P4199  
 Antonini-Canterin, F., P602, P2174, P2184, 2862  
 Antonino, M.J., P681, 2678  
 Antonio, N., P426, P428, P439, 1002, P3000, P3827, P3832, P4225, P4537, P4904  
 Antoniou, G., P473, P1292, P2209, P2531, P2532, P3919, P3973, P4686, P4702, P5533  
 Antonis, P.R., 1261  
 Antonucci, D., P665, P3023, 4950, 5197  
 Antonopoulos, A., P524, P635, 1022, 1023, P2109, P4930, P4933, P5390, P5550  
 Antonopoulos, A.S., P1682, P2311, P4612, 4998, 5136, P5421  
 Antonsen, S., P4770, P4774  
 Antonucci, E., P1592, P3331  
 Antoons, G., P3294, P3312  
 Antretter, H., P2333, P2335  
 Antsiferov, M., P1444  
 Antunes, F., P734, 2677  
 Antunes, M.J., 1002, P2314  
 Antunes, P.E., P2314  
 Antuzzi, D., P3271  
 Anuradha, P., P5522  
 Anutarapongpan, K., P4655  
 Anza', C., P853  
 Anzai, A., P2964  
 Anzai, T., P2964, P3183, P4499, 5143, P5486, P5665  
 Anzola, G., P2346  
 Anzuini, A., P5520  
 Aoki, H., P3374, P4476, P4629  
 Aonuma, K., P838, P1331, P1582, P1625, 1923, P2251, P3036, P3301, P3908, P4862, P5649, P5652  
 Aouate, P., P2517  
 Aoyama, N., P1560  
 Aoyama, T., P3899, P4071, P4177, P4179, P4572  
 Apiyasawat, S., P3335  
 Apostolakis, S., P694, P1546  
 Apostolou, T., P3208  
 Appelbaum, E., P2542  
 Appleyard, M., P3407, P5425  
 Aprico, A., P3942  
 Aprigliano, G., P5520  
 Aprile, A., P2346, P4072  
 Aptecar, E., P2134  
 Apuzzi, V., P2240  
 Aquaro, G., P4508  
 Aquaro, G.D., P822, 1253, P1371, P1597, P3360, P4549, P4550, P4553  
 Aquila, I., 904  
 Arad, M., P2227  
 Aradi, D., P1317, P5283  
 Arai, K., P1361  
 Arajii, O., P5492  
 Araki, M., P3197  
 Aranega, A.E., P4481  
 Arantes, R.L., P2957  
 Arapi, S., P5587  
 Aras, D., P3319  
 Araszkievicz, A., P3196, P3964  
 Araujo, I., P4853  
 Araujo, J., 2651, P4018  
 Arbelo, E., 1114  
 Arbelo Lainez, E., P5622, P5623  
 Arbustini, E., P486, 1212, 5039, P5484, P5543, P5671  
 Arcangeli, C., P699, P1592  
 Archan, S., P621  
 Archbold, R.A., P4086, P4088  
 Archondo, T., P566  
 Archontakis, S., P449  
 Arcidiacono, C., P510, P4814  
 Arcopinto, M., P2240, P2496  
 Ardashev, A., P3318  
 Ardelean, A., P4653, P4673  
 Arderiu, G., P465, P2194  
 Ardissino, D., P540, P3016, P3177  
 Arduini, D., P3016  
 Areias, J.C., P3383  
 Arena, G., P801  
 Arenal, A., 1114, P3342, 3660, 5102  
 Arenare, F., P3406, P5246  
 Arenega, A., P457  
 Arenia, N., P4213, P4240, P4243  
 Ares-Carrasco, S., P3263  
 Arfanakis, D., P829, P3886, P5725  
 Arfanakis, D.A., P694, P1546, P1547  
 Arfeli, E., P3278  
 Argacha, J.-F., P3956  
 Argenziano, M., P856  
 Argiento, P., 5169, 5178, 5181, P5343  
 Argiles, J.M., 239  
 Argiro, S., P2983, 5147  
 Argyle, R.A., P2400, 2865  
 Ariansen, I., P866, 1015  
 Arias, A., 336  
 Ariens, R.A.S., 5118  
 Arif, S., 3639  
 Arimoto, T., P1625, P3301, P5652  
 Arioli, F., P2504  
 Aristizabal, M.D., P4181  
 Arita, T., P1717, 1900  
 Arita, Y., P4467  
 Arizon Del Prado, J.M., 1951, P2306  
 Armada, E., 289  
 Armaganjian, L., P2447  
 Armani, A., 4962  
 Armani, C., P2198, P5512, P5514  
 Armentano, C., P1565, P4155  
 Armero, S., P1346  
 Armesilla, A., P2089  
 Armitage, J., 2782, 3544  
 Armstrong, D.W., P505, P5529, P5713  
 Arnal, J.F., 382  
 Arnar, D.O., P3338, 3776  
 Arnesen, E., P1274, P5426  
 Arnesen, H., P1468, P2088, P2288, P3333, P4864, 5154, 5224  
 Arnett, D., 5045  
 Arnold, J.R., P5340  
 Arnold, M., P1720  
 Arnold, R., 5070  
 Arnould, M.-A., P508  
 Arntz, H.-R., 254  
 Aro, J., P1430, P3376, 3773  
 Aroca, A., P4786, P4790  
 Aronow, W., P1670  
 Aronson, D., 338, 1145, P5689  
 Arora, R., P2309  
 Arpesella, G., P5347  
 Arps, V., P3252  
 Arraiz, G., P3177  
 Arrazola, J., P4563  
 Arribas, A., P4196  
 Arrigo, F., P4473  
 Arrigoni, G., P5561  
 Arroja, I., P3888, P5357  
 Arsenault, M., P4104  
 Arsenos, P., P4149  
 Arshad, A., 233  
 Arshad, M., P3952  
 Arslan, F., 2017, 2018, P4488, P4501  
 Artaiz, M., P1518  
 Artemenko, S., P779, P1615, P1623, P1626, P1627, P1632, P1636, P3091, P3097, 5215  
 Artis, N.J., P5361  
 Arutiunov, G., 1103  
 Arvaniti, C., P2540, P5502  
 Arvedi, M., 256  
 Arveiler, D., 884, P2128, 2650, 3540, P4657, P5443  
 Arya, A., P764, P766, P4187, P4854, P4871  
 Arzamendi Aizpurua, D., P2093, P2131, P4685  
 Asada, H., P1288  
 Asai, K., P1491  
 Asakura, K., P1366, 3562  
 Asakura, Y., P688, P1366, P1505, 3562  
 Asanao, K., P4011  
 Asanin, M., P427, P443, 5208, P5269  
 Asano, T., P1503, P2470  
 Asbach, P., P3027  
 Asbach, S., P405  
 Ascani, F., P3348  
 Ascanio, R., P592  
 Ascheim, D., P856  
 Aschermann, M., P720, P3200  
 Aschieri, D., 252, 256, P3814, P3815, P4155  
 Ascoli, G., P4575  
 Asdonk, T., P5402  
 Asferg, C., P3407  
 Asgar, A.W., P2514  
 Asgari, M., P678  
 Asgarzoei, M., 1242  
 Ashman, N., P4112  
 Ashoush, R., P4863  
 Ashrafian, H., 3639, P3965  
 Asif, A., P4211  
 Asimaki, A., P1698, P3242, P5396  
 Askitis, A., 162, P466, P473, P2209, 3536, P3915, P3922, P4686, P5346, P5533  
 Askitis, T., P453  
 Aslam, M., P455, P1531, P3952, P3953, P4475, P4489  
 Aslam, R., P3110  
 Aslanger, E., 3568  
 Aslanidi, I.P., P415  
 Asoda, Y., P4078  
 Aspenes, S., P3803  
 Aspromonte, N., P4223  
 Aspromonte, N.A., P5677  
 Asrress, K.N., 249, P2368, P3020  
 Assali, A., P649, P667, P4061, P5277  
 Assali, A.E.L.R., P1550  
 Assaly, R., P1384  
 Assanelli, E., P3184  
 Asselberg, F., 2782  
 Asselbergs, F.W., P5466  
 Assmann, G., P3082  
 Assomull, R., P4551  
 Assyag, P., P1718, P2521, P3351

- Astarcioğlu, M.A., P2411  
Astarita, C., P1565  
Astley, C., P5461  
Astori, G., P3094  
Astudillo, M.D., P4181  
Astvatsatryan, A.V., 5048  
Asukai, Y., 4978  
Ata, N., P1723  
Atak, R., P873  
Atalay, S., P5698  
Atar, D., 148, P1481, P1732, P2084, P2965, P4617, 5083, P5501  
Atar, I., P2430, P5648  
Atar, S., P2968, 5205  
Atary, J., 4956  
Atary, J.Z., P1506, P3866, P4082, 5088  
Atea, L., 1114  
Atea, L.F., P3342, 5102  
Athanasiadis, A., 346, P1282, P3277, P4548, 5087  
Athanasopoulos, G., P2149  
Athanasopoulou, E., P3268  
Athanasopoulou, S., P859, P4919, P5667, P5703  
Athlumudali, C., 250  
Atienza, F., P3342, 5102  
Atkins, D.L., P776  
Atmaca, Y., P2225  
Atsma, D., P3059  
Atsma, D.E., P572, P1506, 2819, P3099, P4082, 4956  
Attanasio, R., P3402  
Attevelt, N.J., P3312  
Attias, D., 5074, P5546  
Attie, F., P2375  
Attramadala, H., P1410, P1414  
Attwell, S., P5422  
Atzeni, F., P5435  
Aubele, A., P491, P492, P2304, P2397, P3039, P4183, P4563, P5329  
Aublet Cuvelier, B., P1587  
Aubry, P., 2006  
Auclair, M., 5003  
Auffray-Calvier, E., P2347  
Augeul, L., P3875, P4491  
Auguadro, C., P655  
Aukrust, P., 243, 1100, P1295, P1674  
Aune, E., P2281, P3912  
Auricchio, A., P1281, P1707, P2161, P4228, P4249, P4560, P4646, 5067  
Aurigemma, C., P597  
Aurore, A., P4158  
Aursulesei, V., P3984  
Austruy, J., P3828  
Autschbach, R., P4134, 5064  
Auvvert, B., 5074  
Avallone, E., P819  
Avanzas, P., P3129, P4731  
Avanzas Fernandez, P., P2481  
Avanzini, F., 987, P3131  
Averaimo, E., P4560  
Averaimo, M., P1707, P2161, 5067  
Averina, V., P5706  
Avierinos, J.F., 337, P4107  
Avila, J., P2271  
Avila Alonso, P., 5011  
Avogaro, A., P3971  
Avramidis, D., P4813  
Aw, J., 2004  
Awaddallah, M., P4581  
Awasthy, N., P4811  
Aydin, M., P4268  
Aydin, M.A., P5634  
Aydinkoc, K., 5108  
Aydogdu, S., P873, P3980  
Ayer, J.G., P3986  
Aygun, F., P1290, P4264  
Ayhan, E., P3182, P3195  
Ayhan, H., P5319  
Ayhan, M., P1687  
Aykan, A.C., P2411  
Aymard, T., P2414  
Aytekin, S., P2303, 2860, P3334, 3638, P3909, P3910, P4090, P4635  
Aytekin, V., P2303, 2860, P3334, P3909, P4090, P4635  
Aytemir, K., P1353  
Azar, D., P3004  
Azar, R., P4857  
Azarine, A., P2081  
Azenha Balhau Jorge, E., 2677  
Azevedo, A., P2317, P4895  
Azevedo, E., P1720  
Azevedo, J., P877, P1538, P3888, P4941, P5357  
Azevedo, L., P2491, P4530, P4698  
Azevedo, O., P2491, P4530  
Azevedo, P., 1149, 2679, P2960, P3002, P3193, 4977  
Azevedo Coutinho, M.C., P4579  
Aziz Eldin, H.A., P1601  
Azizi, M., P3800  
Azmy, A., P4119  
Aznaouridis, K., P453, P466, P473, P638, 1020, P1446, P1529, P2185, P2209, P2265, P2531, P2532, 3542, P3919, P3922, P3937, P4265, P4686, P4935, P4936, P5346, P5533, P5721  
Azqueta, M., P1559  
Azucena, C., P2457  
Azuma, A., 394  
Azzato, F., P4482  
Azzolini, P., P806  
Baala, B., P5261  
Baan, J., P2938  
Baan Jr, J., 3569  
Baandrup, U., P5591  
Baba, A., P565  
Baba, Y., 3640  
Babalís, D., P2493, P3189, P3231  
Babarro, E.G., P5603  
Babes, E.E., P4653, P4673  
Babes, V.V., P4653, P4673  
Babikar, A., P783  
Bacal, F., P5699  
Bacchi-Reggiani, M.L., P1571, 5172  
Bacchiani, G., P5435  
Bach, H., P5369  
Bacharakis, D., P2230  
Bachetti, C., P1598  
Bachowski, R., P2315  
Bacior, B., P477  
Back, M., P4608  
Backer, J.M., 393  
Backer, V., P1681  
Backus, B.E., 1956  
Badano, L., P750, 1124, P2168, P3363  
Badariene, J., P3999  
Bader, M., P3268  
Bader, T.R., P3409  
Badger, T., P4819, P4831  
Badger, T.J., P1638, P2451, P4830, P4866  
Badila, E., P3138  
Badimon, J.J., 892, P2113, P3112, P3377, P5407  
Badimon, L., P465, 892, 1152, P1450, P2113, P2194, P3007, P3112, P3207, P4604, P4614, P5416  
Badr-Eslam, R., P4039  
Badran, H., P2154, P2235, 2863, P5342  
Baduena, L., P3860  
Bae, H.J., 1258  
Bae, J.H., P672, P1467, P2992, P4043, P4049, P4708, P4712, P4713, P4726, P5367  
Bae, M.H., P5370  
Baekkevar, M., P3912  
Baer, H., P3373, P3396  
Baertschi, A.J., P556  
Bagautdinova, E., P4175  
Bagi, Z.S., P880  
Baglini, R., P2356  
Bagur, R.H., P3187  
Baheiry, S., P770  
Bahl, A., P2217  
Bahl, V.K., P777  
Bahlmann, E., P4106  
Baholli, L., 5158  
Bahouth, F., 338  
Bai, Y.Y., P1730  
Baicus, C., P3995, P4649  
Baigent, C., 2782, 3544  
Bailey, D., P5422  
Bailey, S., P770  
Baillot, R., 5237  
Baixas, C., P3828, P3835  
Bajpai, A., 249, P3020, P4189, P5381  
Bajraktari, G., P844  
Baker, A.B., 899, P4602  
Baker, V., P2450, 5216  
Bakhai, A., P595, P813  
Bakogiannis, C., P1682, P4612, P4930, 4998, 5136, P5390, P5421  
Bakotic, Z., 5066  
Bakovic, D., P2223  
Bakratsas, K., P2282  
Bakris, G.L., 5045  
Baks, T., P660  
Balaji, S., P776  
Balakrishnan Nair, S., P616, P1554  
Balbach, T., P4787  
Balbacid, E., P4114, P4115, P4117, P4120  
Balbarini, A., 1245, P1273, P1454, P1458, P2198, P2201, P3949, P5249, P5505, P5512, P5514  
Balbay, Y., P873, P3980  
Balbi, M., P4516, P4616, P4628  
Balci, A., P4789  
Baldassarre, D., P3160  
Baldasseroni, S., 5085  
Baldi, A., P4861  
Baldinger, J., P5385  
Baldini, E., P1266  
Baldini, L., P2370  
Baldock-Apps, G., P3020  
Baldus, S., 5158, P5464  
Balestrieri, M.L., P3946, P4598, P4623  
Bali, L., 5119  
Baliauw, C., P1527  
Balint, O.H., P4763  
Baik, A.H.H.M., P4147  
Balkau, B., 2648  
Balkin, J., P3841  
Ball, S.G., P2526  
Balligand, J.-L., 5226  
Balligand, J.L., P1416, P3959  
Ballo, P., P1490, P2168, P3893, P4470  
Ballotta, A., P851  
Balogh, N., P3045, 5219  
Balta, O., P2423  
Baltabaeva, A.T., P459, P2384, P5716  
Balu, S., P2247, P2249, P5409  
Balz, V., P2222  
Balzarini, L., P5299  
Bamberg, F., P3013  
Bamias, A., 5044  
Bampali, T.H., P658, P1552  
Banach, M., P2505  
Banach, M.S., P1488  
Banasiak, W., P4209, P4893, 5059  
Banba, K., P488  
Bancone, C., P2972, P3061, P3065, P3076  
Bande, M., P3176, P4128  
Bandosz, P., P3138  
Banerjee, S., P653  
Bangha-Szabo, D., P4195  
Banning, A.P., P3191, P4047, P4710, 5070  
Banning, A.S., P661  
Bansemir, L., P4902  
Banuelos, C., P1543, P4737  
Banus, Y., P4059  
Banya, W., P3269  
Banys, R., 1259, P5328  
Baou, K., 162, 1020, P1292, P2185, P2209, P2531, P3171, P3405, 3536, P3915, P3919, P3937, P3973, P4265, P4702, P4936, P5721  
Baptista, R., P439, P711, P734, 2677, P2973, P2974, P3000, P4537, P4904, 5185  
Baptista, S.B., P1465  
Baracca, E., P795  
Baracoli, L.M., 1150, P2999, P3005  
Barana, A., P579  
Baranchuck, A., P3290  
Barandon, L., P2961  
Baranich, I.I., P836  
Baranowski, R., P593, P2511  
Barasch, E., P4095  
Barascuk, N., P4607

- Baratella, M.C., P2383  
 Baratta, P., 5234  
 Baravelli, M., P853  
 Barba, J., P1518  
 Barbary, A., 2863  
 Barbati, G., 1213, P3264, P3272, P4244  
 Barbato, E., 340, P1334, P1527, P1535, 3564, P4752, 5117, P5676  
 Barbeau, G.R., P3187, P4742, 5073  
 Barber, G., P505  
 Barbera, J.A., P1572  
 Barbetseas, J., P859, P4919  
 Barbic Zagar, B., P3118  
 Barbier, P., P2168, P4775  
 Barbieri, A., 337, P1713, P3815, P4155, P5657  
 Barbosa, E.C., P4169  
 Barbosa, M.M., P1695  
 Barbosa-Filho, J., P4169  
 Barbou, F., 4989  
 Barchet, W., P5402  
 Bardai, A., P3310, P3311  
 Bardaji, A., 2773  
 Bareiss, P., P1307, P1312, 2775, P3353  
 Barendse, R., 5012  
 Barge-Caballero, E., P1500, P2980, P3186, P5285  
 Barge-Caballero, G., P5285  
 Bargelli, V., P3386  
 Barisani, J.L., P850  
 Barison, A., P822, P4553  
 Barlera, S., P1660  
 Barley, M., P1629  
 Barlis, P., 897, P1271, P3174, P3178, P4046  
 Barlocco, F., P5268  
 Barnathan, E.S., 4992  
 Barone, L., P597, P2226  
 Barone Adesi, F., 885, P3168  
 Barozzi, L., P4806  
 Barquero, J.M., P5492  
 Barraket, N., P4042  
 Barranco, M., P4096, P4097  
 Barrano, G., P685, P1510  
 Barreiro, O., P5353  
 Barrera, A., 5128  
 Barres, R., P605  
 Barreto-Pereira, H.F., P1690  
 Barriales-Villa, R., P3253  
 Barrios, V., P4938  
 Barsotti, A., P4516, P4616, P4628  
 Barsotti, M.C., 1245, P1273, P1458, P2198, P2201, P3949, P5249, P5512, P5514  
 Barst, R., 5173  
 Barst, R.J., P1578, P1602, 5176  
 Bartel, K., P4888  
 Bartel, T., P2344  
 Bartelds, B., P742, P1595  
 Bartelings, M., P785  
 Bartelsmeier, M., 342  
 Bartesaghi, M., P1427  
 Barth, M., P2308, P3079  
 Bartha, E., P1418  
 Barthelemy, O., P431, P1301, P1333, P1469, 1800, 1952, P2083, P3852, P4716, 5207, P5276, P5296  
 Barthelet, M., P4892  
 Barthez, O., P1716  
 Bartorelli, A., P1357, P4723  
 Bartorelli, A.L., P1305, P1356, P1736, P3184, 5071, P5511  
 Bartsch, C., P1419  
 Bartsota, M., P2386  
 Bartunek, J., 340, P1334, P1527, P1535, P3345, P4753, 5117, 5157, P5676  
 Baruteau, A.E., P5551  
 Basalus, M., P1502  
 Basaran, Y., P5365  
 Basarici, I., P1306  
 Bashir, Y., P2989  
 Bashore, T., P745, P3132, 5175  
 Bashore, T.M., P1580  
 Bass, T.A., P1309, P1316  
 Bassand, J.P., P434, P521, 1148, 1958, P2098, 2823, P2935, P3090, P3836, P3839, P3845, P3851, P3856, P4037, P5270, P5271, P5274  
 Bassanelli, G., 5196  
 Basse-Luesebrink, T., P3025  
 Bassetto, S., 4985  
 Bassez, G., P3276  
 Bassiri, H., P2417  
 Basso, C., 1115, 1209, P1267, P1371, P3173, P3233, P3238, P3261, P5396  
 Bastac, D., P4916  
 Bastani, H., P1637  
 Bastante, T., P2357  
 Bastard, E., 1904  
 Bastard, J.P., 5003  
 Bastos, C., P746  
 Bataille, V., P436, P2121  
 Batenburg, W.W., P3210  
 Batika, P., P2986  
 Batista, R., P426, P428, P3827, P3832, P4225  
 Batko, K., P2269  
 Batra, M., P1286  
 Batra, P., P1286  
 Battaia, E., P1300  
 Battellini, R., 1012  
 Battler, A., P649, P2407, P4061, P4585, 5205, P5277  
 Batuca, J., P5420  
 Bau, J., 5236  
 Bauce, B., 1209, P1267, P3233, P3238, P3261  
 Baud, F., P3813  
 Baudoin, F., P1423  
 Baudoin, I., P1413  
 Bauer, A., P569, 3781  
 Bauer, F., P2510, P5262  
 Bauer, I., 1006  
 Bauer, P., P3409  
 Bauer, S., P4609  
 Bauer, T., P4148, P4715, P4736, 4993  
 Bauer, W., P2444, 5221  
 Bauer, W.R., P768, P3025, P3026  
 Bauernschmitt, R., P4126, P4637  
 Bauersachs, J., 385, P2214, P2482, P3966, P4524, P4589, 5055  
 Bauersfeld, U., P778, P4161, P4779, P5555  
 Baugh, J., 5047  
 Bauleo, C., P1371, P1597  
 Baum, S., P4555  
 Baumann, G., P732, P789, P1419, P2099, P3955, P4599, P4700, P4888, 5140, P5580  
 Baumbach, A., P3793, P4040  
 Baumert, J., 132, P4669  
 Baumgartner, H., P3792, P4092, P4101, P5327  
 Baumgartner, I., 156, P629  
 Baumhaeckel, M., P3967  
 Baur, R., P416  
 Bauriedel, G., P4592  
 Bauters, C., P1568  
 Bawazeer, N., P2210  
 Bax, J.J., 157, P857, 887, 1009, 1118, P1351, P1382, P1445, P1451, P1453, P1521, P1653, P1705, P1706, 1911, 2044, 2054, P2075, P2156, P2157, P2170, P2179, P2186, P2242, P2243, P2341, P2467, P2509, 2819, P2966, P3011, P3018, P3159, P3296, P3300, 3648, P3866, P3873, P3876, P3978, P3987, P4102, P4546, P4622, P4633, P4654, P4903, 4947, 4987, 5061, 5088, 5094, 5125, P5252, P5272, P5485, P5513, P5524, P5525, P5633, P5642  
 Bax, N.A.M., P572  
 Bax, W., P3059  
 Baxa, J., P1368  
 Baxter, P.D., 988, 1797  
 Bayer, B., 5055  
 Bayes De Luna, A., 2773, 2778, P4207  
 Bayes-Genis, A., P2525, 2773, 2778, P4207  
 Bayliss, S., P3843  
 Bayol, A.P., P3037  
 Bayon, J., P3129  
 Bays, H., P1733, P2254  
 Bazinet, R.P., 3529  
 Bazzichi, M., P513  
 Bazzino, O., 336  
 Beadle, R., 5179  
 Beaini, Y., P4521  
 Bean, K., P1442, P5424, P5444, P5467  
 Beardsworth, A., 2672, 5173  
 Bearz, A., 5230  
 Beach, G.N., 2780  
 Beato, M., P1678  
 Beau, S.L., P839  
 Beauchet, A., P2155  
 Beaudin, A., P4746  
 Beauloye, C., P2936, 5153  
 Beaune, J., 1950  
 Becane, H.M., P3276  
 Becattini, C., 5186, 5188  
 Bech-Hanssen, O., P501, 5166  
 Bechar, I., P617, P3988  
 Becher, H., P5340  
 Becher, U.M., 1247  
 Beciani, E., P722, P1598  
 Beck, E., P2951  
 Beck, E.B., P2480  
 Beck, M., P3249, P3288  
 Becker, A., 341, 2769, P4497  
 Becker, E., P3245  
 Becker, L., P1531  
 Becker, M.-M., P3882  
 Becker, R., 3781, P4198  
 Becker, R.C., P686  
 Becker, T., P1646, P1665, P4157  
 Beckers, F., P4872  
 Beckers, P., 4960, 4965  
 Beckers, P.J.M., P2949  
 Beckett, N.S., P4844, 4997  
 Beckmann, B.M., 1108  
 Bedetti, G., P433  
 Bedi, U., P2309  
 Bedja, D., P2475  
 Bednarek-Tupikowska, G., P3982  
 Bednarkiewicz, Z., 125  
 Bedogni, F., P3191, P4047, P4710  
 Bedreag, O., P1395  
 Beek, A.M., P1303, P1344  
 Beekman, J.D., P3294  
 Beekman, L.E., 3777  
 Beer, A., P2189  
 Beer, J.C., P3859, P5316  
 Beer, J.H., P4593  
 Beer, M., P2159, P3796  
 Beer, M.B., 2861, P3897, P4105  
 Beer, S., P1464, P2262, P2270, P2279, P2975  
 Beerbaum, P., P4796  
 Beeres, S.L.M.A., 2819  
 Beaver, W., P3140  
 Befani, L., P2354  
 Beggina, G., P3233  
 Beghetti, M., P1574, 5176  
 Begley, J., 2870  
 Behar, S., P2954, P2968, 5205  
 Beheiry, S., P1620, P2448, 3652  
 Behnes, M., P4870  
 Behramoglu, F., P3334  
 Behrens, C.B., P843  
 Behrens, S., P1497  
 Beigel, R., 899, P1362  
 Beinbauer, A., P4039  
 Beiras Torrado, X., 1910  
 Beis, D., P5395  
 Beitnes, J.O., 5224  
 Bejar, K., P5260, P5262  
 Bekaert, S., 153, P3913  
 Bekkers, S.C.A.M., P1375, P2981  
 Bel, A., P2395  
 Beladan, C.C., 2862  
 Belardinelli, L., P404, P567, 903, P3295, P3312  
 Beldekos, D., P2962  
 Belenkov, Y., P3318  
 Beleslin, B., P3117, 3565, P3878, P5331  
 Beletic, A., P4199  
 Belevessis, T.H., P5637  
 Belge, C., P1416  
 Belger, M., P595  
 Belgi Yildirim, A., P1306  
 Belhani, D., P1392  
 Belhassen, B., 1117  
 Bell, A.B., P3141  
 Bell, W., 245  
 Belle, L., 4989  
 Bellemain, A., P2083  
 Bellemain-Appaix, A., P431, P1301, 1952, 5207, P5276, P5296

- Bellera, N., P4058, 5147  
 Belli, G., P5268, P5299  
 Belli, R., P5571  
 Bellineto Ford, L., P4670  
 Bellini, F., P5651  
 Bellis, A., 1248, P3948  
 Bello Morgado, F., P2463  
 Bellocci, F., 2776, P3260, P5611  
 Bellotti, S., 5195  
 Bellotto, F., P584, P2948  
 Bellucci, A., P4003  
 Belmans, A., 888, P4810  
 Belo, A., P1455, P2295, P2544, 2652, P3150  
 Belohlavek, J., P4227  
 Beloka, S., P1437  
 Beloti, F., P4906  
 Belotti, E., P862, P4910, P4927  
 Beltrame, F., P1354, P3034  
 Belu, E., P2219  
 Ben Halima, A., P2067  
 Ben Halima, M., P2067  
 Ben Hamda, K., P2991  
 Ben Jemaa, M., P4121  
 Ben Youssef, A., P2067  
 Ben-Dor, I., P5719  
 Benali, T., 2869  
 Benameur, N., 255  
 Benassi, A., P450, P2346  
 Benchimol Barbosa, P.R., P4169  
 Bendayan, I., P4765, P4768  
 Benderly, M., P2954, P4260  
 Bendinelli, S., P1273  
 Benea, D., 335  
 Benedek, I., P2132  
 Benedek, I.S., P2132  
 Benedek, T., P2132  
 Benedetti, G., P470  
 Benedetti, S., P784  
 Benedetto, U., P407  
 Benes, J., P3349  
 Benessiano, J., 5109  
 Benettin, A., P450  
 Bengel, F., 398  
 Bengtsson, O., P5679  
 Benini, A., P3226  
 Benito, B., P557, P4641, P4685, 5121  
 Benitez, L.C., P3842  
 Benjo, A.M., P2274  
 Bennedsen, H., P4607  
 Bennet, A., 3770  
 Bennink, G., P2374  
 Benopoulos, A., P3163, P4218  
 Benova, K., P5709  
 Bensaid, A., P3887  
 Bensalah, M., P2081  
 Mensch, R., P1298  
 Bental, T., P667, P1507, P4068  
 Benus, G.F.J.D., 2765  
 Benussi, P., P1354, P3034  
 Benza, R., P1579  
 Benzaghoul, N., P2329  
 Benzer, W., P4032, 4969  
 Benzaghoul, N., P3314  
 Beqaraj, F., P5571  
 Beran, S., P522  
 Berard, E., 884, P4657  
 Berbner, A., P2482  
 Berdeaux, A., P1384, P2474, P4494  
 Berdowski, J., P3310  
 Berezniatskaya, V., P786  
 Berg, J., P1498  
 Berg, T., P1321  
 Bergamini, C., P835, P1688, P4098  
 Bergandi, L., P1330  
 Berger, F., P526, P3244, P4809, P4812  
 Berger, I., P2308, P3079  
 Berger, K., 4978  
 Berger, R., P4210  
 Berger, R.M.F., P742, P1573, P1595, P1603, 5174, 5176  
 Berger, S., 5055  
 Bergeron, S., P4104  
 Bergerone, S., P1330  
 Bergerot, C., P3870  
 Bergheanu, S.C., P3224, 4956  
 Berghoefter, G., P1298  
 Bergler-Klein, J., P1619, P2158, P3792, P4092, P4101  
 Bergmann, A., 285, P3820, P4670  
 Bergmann, J.F., P3369  
 Bergmann, M., 2020  
 Bergmann, M.W., P3075, P3078  
 Bergqvist, D., P2192  
 Berisha, V., P844  
 Berkenboom, G., P3956  
 Berkowitsch, A., P1624, P3325  
 Berlage, T., P3050  
 Berliner, D., P4245, P4882  
 Berlinger, K., P2332  
 Berlinghieri, N., P2416  
 Berman, E., P4716  
 Bermejo, J., 1114  
 Bermudez, G., P598, P2541, P5439  
 Berna, P., P4491  
 Bernal, M.D., P4181  
 Bernard, M., P3032  
 Bernard, Y., P521, P3856  
 Bernardo, E., P1316  
 Bernardo, R., P1642, P3321  
 Bernardo Garcia, E., 4958  
 Berndorff, D., P4584  
 Bernhardt, P., P1345, P1376  
 Bernheim, A., P740, P2152, P3356, 5093  
 Bernier, M., P3880  
 Bernocchi, P., P5471  
 Beronov, K., P3958  
 Berrettini, U., P4575  
 Berriman, T.J., P2450  
 Berrocal, D., P535  
 Berruazo, A., P1617, P1662, P3291, P3292, P3302, P3305, P3337, P5608, P5644  
 Bertacco, E., P5561  
 Bertaglia, E., 5217  
 Bertault-Valls, V., P5599  
 Bertaux, G., P3058  
 Bertel, O., P3824  
 Bertella, E., P1356  
 Berthelot, A.L., P3828  
 Bertheussen, G.F., P3803  
 Berthier, F., P743  
 Berthier, R., P2112  
 Berthold, H.K., P5414  
 Berti, S., P3052, P4628, P5505, P5567  
 Bertin, B., P2083  
 Bertini, M., P1705, 2044, P2079, P2156, P2157, P2179, P2186, P3873, P3876, 5094, 5125, P5272, P5633, P5642  
 Bertolami, M.C., P2256  
 Bertolotti, A., P4621  
 Bertomeu, V., P864, P4259  
 Bertomeu Martinez, V., 5004  
 Bertomeu-Gonzalez, V., 5004  
 Berton, G., P4837  
 Bertora, D., P2151  
 Bertrand, M., 1799  
 Bertrand, M.E., P2204, P3850  
 Bertrand, O., P3092, P4742, 5073  
 Bertrand, O.F., 1251  
 Berwick, D., P712  
 Besler, C., 387, P2107, 2913, P5420  
 Bestehorn, H.-P., P4053, 5116  
 Bestehorn, K., P2253, P5408  
 Betbout, F., P2991, P4042  
 Betge, S., P2522  
 Bethencourt Gonzalez, A., P4792, P4793  
 Betocchi, S., P5406  
 Betriu, A., P2983, 5147  
 Bettencourt, P., P5595  
 Bettencourt De Sousa, N., P3024  
 Bettini, F., P851  
 Bettio, M., P602  
 Bettmann, M., P489  
 Betts, T.R., P2989  
 Beucher, H., P4143  
 Beukema, W.P., P758, P1635, P2441  
 Beurrier, D., P1645, P3314, P4170  
 Bevilacqua, M., 1115  
 Bevilacqua, S., 5160  
 Beyar, R., 1145  
 Beyaztas, A., P1723  
 Beyersdorf, F., P4142  
 Beyersdorf, N., P1569  
 Beygui, F., P431, P1301, P1333, 1952, P2083, P2977, P3852, P4716, 5200, 5207, P5276, P5296  
 Beynon, R.P., P2400, 2865  
 Bezante, G.P., P4516, P4616  
 Bezerra, H., P4076, 5211  
 Bezgin, T., P1600, P1605, P5322, P5325  
 Bezlyak, V., 241, P4220  
 Bezzina, C.R., P3238, 3777  
 Bhardwaj, K., P4811  
 Bhargava, A., 397  
 Bhargava, B., P2285, P2389, P3086  
 Bhatt, D., P4222  
 Bhatt, D.L., 156, P629, 1800, 1952, P2097, P2293, P3141  
 Bhattacharyya, S., P2085  
 Biagini, E., 344, P3239  
 Biagioli, P., P3348  
 Bialkowski, J., 2010  
 Bianchetti, F., P3830  
 Bianchi, M., P1355, 5186, P5520  
 Bianchi, S., P806  
 Bianchini, A., P567  
 Bianchini, E., P1712  
 Bianchini, F., P1660  
 Bianda, N., P1372  
 Biasillo, G., P3834  
 Biasucci, L.M., P461, 1155, P1314, P3834, P4861  
 Bibinkumar, K., P3927  
 Bichi, S.B., 1011  
 Bickel, C., P1476, P3120  
 Bidoli, E., 5230  
 Bieback, K., P3088  
 Biederman, A., P4163  
 Biedermann, A., P4125  
 Biedermann, M., P1516  
 Biedert, S., P4201, 5078  
 Bieganowska, K., P4163, P4772  
 Bieglmayer, C., P1619  
 Biel, M., P409  
 Bielawska, A., P4772, P4783  
 Bielecka, A., P2410  
 Bielecka-Dabrowa, A., P2505  
 Bielenberg, W., P558, P5378  
 Biemond, B.J., P3101  
 Biendel Picquet, C., P3835  
 Bienek-Ziolkowski, M., P416  
 Bienias, P., P704  
 Biermann, J., P405  
 Biernatowicz, M., P5590  
 Biesmans, L., P4639  
 Biffanti, R., P2383, P4799  
 Biffi, M., P1649, P1705, P2079, P2157, 5094, P5618, P5642  
 Bigalke, B., P3096, 3772, P4613, P4867, 5232, P5311  
 Bigard, X., P2328  
 Bigazzi, F., P2264  
 Biggi, A., P2207  
 Bigi, R., 2048, P4639  
 Bigras, J.L., P5549  
 Bijmens, B., P459, P3796, P3884  
 Bijmens, B.B., P3897  
 Bijmens, B.H., P577, P2148, P5636  
 Bikou, O., P569, 3781  
 Bildirici, U., P1290, P4193, P4264, P5598  
 Bilinska, M., P593, P2511  
 Bilinska, Z.T., 2043, P3128  
 Bilir, C., P4468  
 Bilkova, D., 4990  
 Billah, B., 1097, 1824  
 Billard Philip, C., P1373  
 Billias, D., P4031  
 Billing, E., P589  
 Bilo, B., P1435, P3807  
 Bilo, G., P1427, P1435, P3807, P5694  
 Bilo, H.J.G., P1448  
 Bilodeau, L., 5157  
 Bin, J.-P., P5356  
 Binaghi, G., P2507

- Binder, L., 1126, P2428  
 Binder, T., P1619, 1901, P2158, P4101  
 Bingham, A., P2128  
 Binici, Z., P1289, P4846, P5423  
 Binner, L., P797  
 Binner, P., P1269  
 Biondi Zoccai, G., P1551, P2094, P4057, P4532  
 Biondi Zoccai, G.G.L., P3191, P4047, P4710  
 Biondi-Zoccai, G., P1549  
 Birch, K.M., P5361  
 Birdane, A., P1723  
 Birkenhauer, F., P5647  
 Birket-Smith, M., P3155  
 Birkhead, J., P3844  
 Birkhead, J.S., 2671  
 Birkmeier, A., 2931  
 Birks, E.J., P2334, P2336  
 Birmpa, D., 126, P3157, P5666  
 Bisbal, F., P438  
 Bisch, L., P5620  
 Bischoff, B., 1260, P3035  
 Bischoff, S., P2345  
 Bisconte, M.G., P4543  
 Bisping, E., 5131  
 Bistola, V., 126, P3157  
 Biteker, M., P2411, 2770  
 Bito, V., P4639  
 Bittencourt, H.N.S., P1695  
 Bitter, T., P1675, P3307, P4226, P4909, P5693  
 Biyikoglu, S.F., P3980  
 Bizrah, M., P5613, P5704  
 Bjelland, I., 128  
 Bjork Ingul, C., P509  
 Bjorkander, I., P4173  
 Bjorkeng, T., P5678  
 Bjorling, A., P2459  
 Bjornerheim, R., P2122, P3877  
 Bjornstad, J.L., P1410  
 Blagden, M.D., P1734  
 Blake, G., 251  
 Blana, A., 3779  
 Blanc, J.J., P1648, P4241, P4840, P5599, P5625  
 Blanchard, D., P631  
 Blanco, I., P1572  
 Blanco, R.M., P2525  
 Blanco-Palacios, G., P4912  
 Blangy, H.B., P4110  
 Blank, C., P610  
 Blanke, P., P4142  
 Blankenberg, F.G., 393  
 Blankenberg, S., 984, P1294, P1476, P3120, P4594  
 Blann, A.D., P1504  
 Blaschke, F., P4587  
 Blau, N., P4779  
 Blauer, J., P4552, P4830  
 Blauwet, L., 341  
 Blazar, D., P4585  
 Bleasdale, R.A., P790  
 Bleie, Ø., P1295  
 Bleiziffer, S., P4126  
 Blessberger, H., P3004  
 Bliden, K., P676, P681  
 Bliden, K.P., 2678  
 Blinc, A., P3118  
 Bloch Thomsen, P., P5706  
 Block, M., P4566  
 Bloehs, R., P2422  
 Blom, M.T., P3310, P3311  
 Blom, N.A., P785, P1639, P4141  
 Blomstrand, D., 154  
 Blomstrom, P., P5696  
 Blomstrom Lundqvist, C., P5696  
 Blondheim, D., P4211  
 Blondin, P., P2118  
 Blouin, J.L., P3241  
 Blue, L., 5008  
 Blueher, M., 4963  
 Bluem, B., P1541  
 Bluemcke, I., P5498  
 Boari, G.E.M., P549, P559  
 Boarin, S., P4738, P5267  
 Boati, E., P4775  
 Bobak, M., P2543, 3535  
 Boboshko, A., P5601  
 Bobrishev, K.A., P5726  
 Bobrova, E.V., P5726  
 Boccalon, H., 3530  
 Boccanelli, A., P1719  
 Boccara, F., P2977, P4190, P4257, 5003  
 Bocchi, E.A., P583, P1671, P5699  
 Bochdansky, T., P2270  
 Bochenek, A., P2315, 5240  
 Bochkov, V., 1249  
 Bockeria, L.A., P415, P855  
 Boczor, S., P5634  
 Bodalski, R., P4163  
 Bode, C., P405, P642, P643, 1246, P4142, P4479, P5352, P5375  
 Bode, C.H., 161  
 Bode, E., P4662  
 Bode, K., P4854  
 Bode, T., P4662  
 Bodegard, J., P4679  
 Bodi, V., P430, P1275, 3567, P4725, 5112  
 Bodini, B.D., P5435  
 Boecker, C., P1415  
 Boecker, D., 5221  
 Boeckstegers, P.B., 2928  
 Boehm, A., 5015  
 Boehm, B.O., P528  
 Boehm, M., 244, P568, P1370, P1516, P2187, P2266, P3083, P3102, P3206, 3658, P4478, 4971, P5373  
 Boehm, M.T., P3967  
 Boehmer, F.-D., 5133  
 Boengler, K., 2016  
 Boenner, F., P3029  
 Boersma, E., P639, P1453, 1799, 2003, P2075, 2819, P3011, 4995, 5088, P5312, P5464  
 Boersma, H., 887, 1252, P4035  
 Boersma, L.V.A., P4823  
 Boesel, D., P3212  
 Boetker, H.E., P2171, P4490, 5146, P5286  
 Bogaert, J., 1253, P1342  
 Bogdan, C., P3794  
 Bogdanova, M., P3267  
 Bogers, A.J.J.C., P3902  
 Bohm, F., P3961  
 Bohm, M., P2493, P4631, 5051  
 Bohmer, E., P2122, P3877, 5154  
 Bohunek, L., P4493  
 Boileau, C., P5543, P5546  
 Boiti, C., P5511  
 Boivin, V., P1569, P4882, 5231  
 Bojara, W., P1530, P4040  
 Bokenkamp, R., P4141  
 Boland, J., 5111, 5153  
 Boldt, J., P4127  
 Bolduc, V., P546  
 Bolgan, I., 3646  
 Bolland, M.J., P1479  
 Bollano, E., P2325, P3370  
 Bollati, M., P1549  
 Bolling, S., P4132  
 Bollmann, A., P764, P766, P4848  
 Bologna, F., P4116  
 Bolognese, L., 5195  
 Bolz, A., P3933  
 Boman, K., 159, P863, P4661, P5570  
 Bombardieri, S., P413  
 Bombardini, T., P1711, P1712, P5347  
 Bombelli, M., 168  
 Bomderman, D., 5177  
 Bomfim, A.S., P4169  
 Bonaa, K.H., P1274  
 Bonadies, M., P655  
 Bonan, R., P4138  
 Bonanno, C., P450  
 Bonardi, M., P515  
 Bonaros, N., P2344, 5241  
 Bonatti, J., P2344, 5241  
 Bonaventura, K., P5653  
 Bonda, T., P5300  
 Bondar, I., P1466  
 Bonderman, D., P713, P715, P717, P724, P1613, P5282, P5568  
 Bondi, E., P701  
 Bondke, H., P789, 5221  
 Bondy, G., P4002  
 Bonello, L., 2681, P3290  
 Bongard, V., 884, P1463, P1608, P2128, 2650, 3540, P3828, P4657, P4740  
 Bongarzoni, A., P735, 5188  
 Bongiorno, M.-G., 1902  
 Bongiorno, M.G., P2358, P5651  
 Bonhoeffer, P., P2352, P4795, P4797  
 Bonibaldoni, E., 256, P3814, P3815, P4155  
 Bonino, C., P5343  
 Bonizzato, S., P5520  
 Bonmassari, R., P4727  
 Bonnefoy, E., P3870  
 Bonne-meier, H., P815, 1113, P4869, P5621, P5690  
 Bonner, G., P4032  
 Bonnet, D., P1574, 5176  
 Bonnet, J.-L., P5582  
 Bonnet, J.L., 5117, 5119  
 Bonnet, P., P436  
 Bonnet, P.H., 5109  
 Bonny, A., P4166  
 Bonomo, C., P1673  
 Bonow, R.O., P2394  
 Bonser, R.S., 3639  
 Bonvin, C., P3895, P5500  
 Bonvini, R., P3895, P5500  
 Bonzi, M.F., P3032  
 Boodhwani, M., 5165  
 Boogers, M.M., P3018  
 Boomars, K.A., 5174  
 Boonstra, A., P721  
 Boonyaratavej, S., P2351  
 Boonyasirinant, T., P4815  
 Bootsma, M., P1506, P4082, 4956  
 Borbola, J., P3343, P3344  
 Borchard, R., P4197  
 Borchard, R.B., P765  
 Borchi, E., P3386  
 Bordachar, P., P2141  
 Bordi, B.L., P5677  
 Bordicchia, M., P4620, 5134  
 Bordonali, T., P3830  
 Bordone, J., P850  
 Bordononi, E., P519  
 Borelli, G., P5651  
 Boren, J., 378, P5414  
 Borg, A.N., P2400, 2865  
 Borgel, D., P4849  
 Borger, M., 1012  
 Borges, A.C., P4700  
 Borges Sa, M., P788  
 Borggreffe, M., P1664, P1669, P3289, P3290, P3293, P3364, 3641, P4636, P4870, 5123  
 Borggreffe, M.B., P4145  
 Borghese, L., 1104  
 Borghi, C., P5539  
 Boriani, G., P1649, P1705, 2044, P2079, P2157, 5062, 5063, 5094, P5272, P5618, P5642  
 Boricic-Kostic, M., P3878  
 Borjesson, M., P5411  
 Borleffs, C.J.W., P1653, P1705, 1911, P2157, P2467, P3296, 5125, P5633, P5642  
 Borleffs, J.W., 2044  
 Borodulin-Nadziejia, L., P4893  
 Borowiec, A., P609, P4859  
 Borquez, E., P435  
 Borsanyi, T., P4233, P4234  
 Borsatto, F., P4109, P4123  
 Borst, M., P4245  
 Borst, O., P4613  
 Bortoluzzi, A., 160  
 Bortolotto, L.A., P4929  
 Bortoluzzi, A., P3971  
 Bortone, A.B., P5493  
 Bortsova, E., P786  
 Boruc, A., P5590  
 Bosa-Ojeda, F., P4912  
 Bosch, C., P1721, P4219  
 Bosch, D., P3854  
 Bosch, J.G., P493  
 Bosch, J.L., P2462  
 Bosch, X., P435, P438, P1275, 5147  
 Boschat, J., P2074  
 Boscheri, A., 5187

- Boschi, L., P4759  
 Boschmann, M., P1679  
 Bosco, P., P3916  
 Boshchenko, A., 2871  
 Bosia, A., P1330  
 Bosinakou, E., P536, P1287, P3917  
 Bosker, A.C., P4696  
 Bosman, A.G., P3087  
 Bosmans, J.M., P5332  
 Bosschaert, M.A., P2136  
 Bosso, G., P2240  
 Bossone, E., P602, P851, P1266, P1565  
 Botelho-Nevers, E., P4124  
 Botker, H.E., P2130, P4720, 5142, P5290, P5553  
 Bots, M.L., P4221  
 Bott-Fluegel, L., 1006  
 Bottaro, S., P2330, 5234  
 Bottega, N.A., P4776  
 Botto, G.L., P1649  
 Botto, N., P537, P2381, P5547  
 Bottone, U., P5547  
 Bottos, J.M., P4610  
 Botusan, I.B., P3003  
 Bouchard, B., P1397  
 Bouchardy, J., P4776  
 Bouchot, O., P1373  
 Boudjemline, Y., P2081  
 Boudou, N., P4740  
 Boudoucha, N., 5213  
 Boudoulas, H., 898, P2488, P4208  
 Boudreaault, J.R., 5073  
 Boudriot, E., P2068, 2928  
 Bouganim, T., P2407  
 Bougard, R.S., P2334, P2336  
 Boughen, R.P., P5578  
 Bouisset, F., P3828  
 Bouitbir, J., P1676, P3392  
 Bouki, K., P3208  
 Boulaksil, M., P3294  
 Boulanger, J., 2869  
 Boullin, J.P., P799  
 Boulogne, E., 1902, 1903, 5062, 5063, P5610  
 Bouly, M., P546, P2499, 5052  
 Bouma, B., P4077  
 Bouma, B.J., P1381, 2001, P4767, P4782, P4802  
 Bouman, H.J., 2682  
 Bountziouka, V., 3539  
 Bouraoui, S., P2067  
 Bouras, G., 1023  
 Bourbon, M., P2276, P2297  
 Boureux, C., 5149  
 Boussaada, R., P5259  
 Boussy, T., 1110, P3291, P3292, P3302, P3305  
 Boutekadjirt, R., P2316  
 Bouyer, P., 5069  
 Bouzamondo, A., P1469  
 Bouzas Mosquera, A., P596  
 Bouzas-Mosquera, A., 2047, P5350  
 Bouzguenda, I., P2372  
 Bouzin, C., 5226  
 Bovelli, D., P1266  
 Boven V, W.J., P4823  
 Bovenzi, F., 2048, 2867, P3885, P3889, P3890  
 Bover Freire, R., 1910  
 Bovio, M., P5669  
 Bovone, S., P1678  
 Bowater, S., 5179  
 Bowes, P., P813  
 Boy, O., 5072  
 Boyer Chatenet, L., P4190  
 Boyko, V., P2968, 5205  
 Boytsov, S.A., P2302  
 Bozbas, H., P514, P2237  
 Bozbay, M., P3182  
 Bozdog-T, I., P547  
 Bozic, M., P3118  
 Bozkurt, E., P5319  
 Braam, B., P5656  
 Braat, S., P4528  
 Brachmann, J., P1541, P1634, P2451, P4552, P5647  
 Bracho, M., P598, P2541, P5439  
 Bradley, D.J., P776  
 Bradley, M., 2004  
 Brady, P.A., 2774  
 Braga, A.M.W., P4698, P4699  
 Braggion, G., P795  
 Bragina, O.M., P1485  
 Bragulat, E., P1275  
 Braitto, G., P4727  
 Brakenhielm, E., P2510  
 Braksator, W., P4917  
 Brambilla, G., P5246, P5714  
 Brambilla, N., P3191, P4047, P4710  
 Bramos, D., P2534  
 Brancati, M.F., P662  
 Branco, L., P5600  
 Brandao, A., 2679, P2960  
 Brandao, S.A., P3939  
 Brandao, V., P2129  
 Brandao Neto, J., P3998  
 Brandenburg, V., P5383  
 Brandes, K., P2322  
 Brandl, J., P5653  
 Brandrup-Wognsen, G., 5235  
 Brandt, A., P3385  
 Brandt, C.A., P4574  
 Branidou, K., P3995, P4649  
 Branzi, A., 337, P423, P424, P722, P1571, P1598, P3236, P3239, P3858, 5172, P5618  
 Bras-Silva, C., P411, P837  
 Brasolin, B., P3862  
 Bratsas, A., 162, P453, P460, P608, P1529, P2185, P2283, P2531, P3399, P3401, P3404, P3919, P3937, P4024, P4265, P4681, P4936, P5721  
 Bratseth, V., P4864  
 Bratti, P., 160  
 Braun, J., P857  
 Braun, S., P1313, 5114  
 Braun-Dullaues, R.C., P548, P550, P4186, P4588  
 Braunersreuther, V., 5139  
 Braunschweig, F., P1637, 2762  
 Braunstein, T.B., P3962  
 Braunwald, E., P3008  
 Bravo, L., P3842  
 Bravo, M., 977, P1724  
 Bravo Calero, L., 5011  
 Breborowicz, P., P2396  
 Brechtel, L., P4700  
 Brecka, D., P5640  
 Breckwoldt, J., 254  
 Breet, N., 2682  
 Brehm, A., P533, 3775, P4642, P4683, P4687  
 Brehmer, K., P4134  
 Breidhardt, T., P4201, P4213, P4240, P4243, P4878, 5078  
 Breitenstein, A., 378, P3944, P5385, P5386  
 Breithardt, G., P565, P2418, P3252, 3651, P4198, P4640, P4833, P4836, P4841, P4852  
 Breithardt, O., P1541  
 Breithardt, O.A., P778  
 Brembilla-Perrot, B., P1645, P3314, P4170  
 Bremme Katarina, K.B., P1727  
 Brennan, A., 2647, P5481  
 Brennan, A.L., 4951  
 Brenner, B., P3245  
 Brenner, S., P417, P5670  
 Breskovic, T., P2223  
 Bresser, P., 5174  
 Bressollette, E., P4059  
 Bretler, D.M., P1439, P2290, P2299, P4684  
 Breuer, M., P2342  
 Breunig, F., P2159  
 Breuss, J., P2279, P2975  
 Brevetti, G., P5527, P5534, P5540  
 Brevetti, L., P5527  
 Breyne, J., P5564  
 Briand, S., 2913  
 Briassoulis, A., P2200  
 Briceno, S., P598, P2541, P5439  
 Brickham, B., P4135  
 Brieger, D., P677  
 Brierre, G., P506, P1608  
 Briffa, T., P592  
 Briganti, E., P2199, P2201  
 Briggs, A., 150  
 Brigido, S., P3272  
 Brignani, A., P559  
 Briguori, C., P4084  
 Briili, S., P859, P4217, P4919  
 Brillia, K., P4080  
 Briili, S., P5550  
 Brinckmann, J.E., 5224  
 Brinton, E., P1733  
 Brismar, K., P3003  
 Brito, D., P3270  
 Brito, J., P611, P1456, 1960, P3227  
 Brito, J.D., P5281  
 Broadhurst, P., P804  
 Brochet, E., 2006, P4099, P4131, 5155  
 Broda, G., P637  
 Broderick, R., P4831  
 Brodie, B.R., P645  
 Brodie, D., P3048  
 Brodie, D.A., P2334, P2336  
 Brogioni, S., 5052  
 Brokopp, C.E., P4609  
 Brondex, A., 1112  
 Bronner, F., 5069  
 Bronstad, E., P509, 4970  
 Bronze Carvalho, L.C., P877, P1538, P4941, P5357  
 Brooks, A.G., P2426, P2443, P3341, P5560  
 Brooks, V., P790  
 Broome, M., P2459  
 Brophy, J., 5007  
 Brosa, M., P755  
 Broscheit, J., P768  
 Brosh, D., P667, P1507, P4068, P5277  
 Brosh, S., P1362  
 Brosovic, I., P675  
 Broughton, A., P5639  
 Brouillette, S., P542  
 Brouillon, F., P5350  
 Brouillon, F.J., P596  
 Brouwer, M.A., P2163  
 Brouwer, W., P3389  
 Brouwers, F.P.J., P5466  
 Brown, A., P3140  
 Brown, D.L., P2182  
 Brown, M.A., P5308  
 Brown, R., P1494  
 Browne, L., 251  
 Browning, P., P1532  
 Brozovic, I., 5108  
 Brubakk, A.O., P2223  
 Bruckert, E., P2244, P5444  
 Bruckner, I., P4899  
 Brudek, M., P1433  
 Bruder, O., 1255, P1337  
 Brudin, L., 985  
 Brueckmann, M., P4870  
 Bruegel, M., P4690  
 Brueggenjuergen, B., P642  
 Brugada, J., P557, 1110, P1617, P1662, P3291, P3292, P3302, P3305, P3337, P4641, 5121, P5608  
 Brugada, P., 1110, 5121  
 Brugada, R., 1110, 5121  
 Brugaletta, S., P697  
 Bruges, L., 5243  
 Brugger-Andersen, T., P830, P2277, P2969  
 Brugier, D., P2083  
 Brugniaux, J., P4746  
 Brugs, J., 1799, 4995  
 Brugs, J.J., P3122  
 Bruguera, J., P4051, P4094  
 Brum, P.C., P3378, P4698, 4961  
 Brun, F., 1213  
 Brunnckhorst, C., P2162  
 Brundage, B., 5173  
 Brunel, P., P2112  
 Brunel, P.H., P2121, P4059  
 Brunelli, M., P4174, P4182, P4827  
 Brunetti, N.D., P2150, P4191  
 Bruneval, P., P2474  
 Brunken, R., 397  
 Brunner, M., P405  
 Brunner, S., P462, 2912, 2915, P3082  
 Brunner-La Rocca, H.P., P669, P673, P2152, P3356, 5084, 5093, P5289  
 Bruno, I., P4578  
 Bruno, N., P3862



- Bruno, R.M., P3414  
Bruno, V., 5108  
Brunotte, F., P1373, P3847  
Brunstein, G., P5492  
Brunvand, H., P3865, P5313  
Bruselli, L., P1597  
Bruskina, O., P684, 2931  
Bruthans, J., P5494  
Bruun, N.E., P4122  
Bruzese, G., P4623  
Brydak, L.B., P3128  
Bryniarski, L., P683, P872  
Brzezinska-Paszke, M., P4772  
Brzezinska-Rajszyz, G., P5590  
Brzoska, J., P3918, 5065  
Brzozowska-Czarnek, A., P683  
Brzozowska-Kiszka, M., P872, P4255  
Buber, Y., P3017  
Bucchiarelli-Ducci, C.H., P3174, P3178  
Bucciarelli, T., P4674  
Bucciarelli-Ducci, C., P1262  
Buche, M., 5165  
Bucher, H.C., 1103  
Buchmuller-Cordier, A., P698  
Buchta, P., P5288, P5307, P5309  
Buck, S., 235, P5607, P5614  
Buckland, R., P1310  
Buckley, H., P2366  
Bucsa, A., P5659  
Bucsa, C., P5659  
Budaj, A., 888, P3925, P5521  
Budaj-Fidecka, A., 5183  
Budalina, A.E., P5462  
Budera, P., P2446  
Budesinsky, T., P791, P2402  
Budinski, D., P4624  
Budoff, M., 5086  
Budts, W., P615, P4805, P4810  
Budts, W.I.H.L., P4804  
Buechel, R., P2078, P3033, P4562  
Buechel, R.R., 396, 399  
Buellesfeld, L., P4143  
Bueltmann, A., P3096, P4613  
Buendia, A., P2375  
Bueno, H., P434, 1148, 1958, P3842, P3845, P3851, P5270, P5271, P5274  
Buerger, A., P4261  
Buerke, M., P2408  
Buettner, H.-J., P4053, 5116, 5194  
Bufe, A., P666, P4902  
Buffet, P.H., P3859, P5316  
Bugala, M., P3064  
Bugge, J.F., 292  
Bugiardini, R., P2092, P2937  
Bugra, Z., 3568  
Bugra Nacar, A., P4192  
Bui-Xan, B., P1392  
Bui-Xuan, B.B.X., P4500  
Buja, G., 1115, P3261  
Bujold, E., P3092  
Bukowska, A., P4186  
Bulentaeva, Z., P4611  
Bulgarelli, A., P5720  
Bulpitt, C., P4844, 4997  
Bult, H., 905, 1256  
Bulugahapitiya, D.S., P4521, P4570  
Bun, S.S., P769, P3032  
Bunce, N., P2148, P5552  
Bundgaard, H., P3282  
Buonomici, P., 4950  
Bura, A., 3530  
Burchardt, P., P3935  
Burchell, T.R., P1566, P3281  
Burchert, W., P4545  
Burckhardt, D., 5084  
Burg, M., P3165  
Burgdorf, C., P815, P3375  
Burger, I., P2078, P4562  
Burger, I.A., 396, 399  
Burgess, G., P1579, P1589  
Burgess, M.I., P2515  
Burgmans, M., P3265  
Burgon, N., P2451, P4552, P4819, P4831, P4866  
Burgon, N.S., P1638, P4830  
Burgos, L., P2369, P4718, 5198  
Buring, J.E., P5445  
Burkard, N., P3365, P3366  
Burkard, T., P2406  
Burkhard, N., P3033  
Burkhardt, J.D., P770, P1620, P2448, 3652  
Burkhardt, U., P1646  
Burkhoff, D., P4903  
Burls, A., 5203  
Burls, A.J., P3843  
Burman, A., 4972  
Burmman, A., 4963  
Burnett, J., P810  
Burnett, J.C., P1424, P1425, P2490, 3774  
Burnett, M.S., P2190  
Burns, A.T., P1591, 4974, 5091  
Burns, S.L., P4002  
Burrell, L.M., P3382  
Bursi, F., 337, P1713, P5657  
Burtchaell, S., P2434  
Burton, F.L., P553  
Burwash, I.G., P3792, P4092  
Bury, K., 1259  
Burzotta, F., P662, P697, P1314  
Busabaratana, M., P4655  
Buschmann, E., 2818  
Buschmann, I., 2818  
Buser, P., P740, P2152, P2406, P2965, P3356  
Bush, C., 1105  
Busjahn, A., 2020, 2818  
Bussadori, C., P510, P4814  
Busse, M.W., P4269  
Busseuil, D., P2499  
Bussieres, L., P603  
Bussotti, M., P5694  
Bustea, C., P4673  
Buszman, P., P2315, P3068, P3849, 4948, P5273, P5279, P5287  
Buszman, P.E., P3218  
Buszman, P.P., 4948  
Butera, G., P510, P2346, P4814  
Butler, J., P2144, P2513, P4203, P4222  
Butter, C., P2469  
Buttitta, F., P5505  
Butz, T.B., P765  
Buys, R., P615, 4967  
Buyschaert, I., 153, 888, P3913  
Buz, S., P4133  
Buzea, A., P5660  
Buzzetti, F., 5056  
Buzzi, M.P., 5104  
Buzzi, S., P3406  
Bykowska, K., P5562  
Byrne, M., P1689  
Byrne, R., 2929, P2995, P5304  
Byrne, R.A., P684, P1332, 2931  
Bystron, M.B., 2924  
Cabaco, R., P1465  
Caballero, R., P579  
Caballero Dorta, E., P5622, P5623  
Cabanos, R., P3167, P4231  
Cabello, J., 5203  
Cabello Lopez, J., P3843  
Cabanca, E., P450  
Cabrera, J.A., P1641  
Cabrera, M.C., 5068  
Cabrera Bueno, F., 5128  
Cabrera Bueno, F.J., P457  
Cabrera Sierra, M., P5473  
Cabrita, D., P3321  
Cabrita, I.Z., P512, P1576  
Cacace, A., 2866  
Cacciatore, F., P590, P4598, P4623  
Cacciatore, G., P1719  
Cacciavillani, L., P1267, P1371, P3173, P3261, P5579  
Cadarsu Suarez, C., P441  
Cadeddu Dessalvi, C., P2507, P5589  
Cademartiri, F., P1352, P1354, P3016, P3023  
Cadenas, J., P2076  
Caeiro, D., P4915  
Cafarelli, F., P5487  
Caforio, A.L.P., 1003, P2330, 5234  
Cafri, C., P2086, P3194  
Caggegi, A., P685, P2066, P4722  
Cagide, A., 336  
Cagirci, G., P873, P3980  
Caglayan, E., 902  
Cagil, K., P3319  
Cahill, T., P813  
Cahyadi, Y.H., P672, P1467, P4043, P4048, P4049, P4708, P4712, P4713, P4726  
Cai, W.J., P2205  
Caidahl, K., P605, P1480  
Cailliod, R., P5675  
Caimi, L., P559  
Caimi, V., 987  
Caires, G., P4018  
Cairns, K.J., 253, P5434  
Cairns, R., P1441, 2649  
Caixeta, A., 1957  
Calabrese, A., 5130, P5645  
Calabrese, F., P2240, P2496  
Calabro', P., P3248  
Calabro', R., P751, P801, P2174, P2370, P3248, P3896, P4771, P4781, P4785, 5178, 5181, P5343  
Calabuig, J., P1518  
Calafiore, A.M., P685, P2066  
Calazans, L.C., P847  
Calcagnino, M., P515  
Calcutteea, A., P503  
Caldara, G., P1427, P1435, P3807, P5694  
Caldentey Adrover, G., P4792, P4793  
Calderon, A., P4938  
Calderon Colmenero, J., P2375  
Cale, R., P611, P1456, P3227  
Calenta, C.H., P4732  
Califf, R., P4198  
Calin, A., 2862  
Caliskan, K., 1210, P3243, P4147  
Calli, A., 343  
Calmac, L., P2092  
Calmez, G., P1616  
Calo, L., P4146, P4151, P4826, 5062, 5063, 5222  
Calore, C., P3250  
Calqueiro, J., P611  
Calquinha, J., P2320, 5243  
Calvino Santos, R., P641, P1499, P1500, P3186  
Calvino-Santos, R., P2980, P5285  
Calvino-Santos, R.A., P840  
Calvo, D., P3342, 5102  
Calvo, N., P3337  
Calvo, R., 5161  
Calvo Bonacho, E., P5473  
Calzolari, M., P5695  
Camara-Feita, E., P3263  
Camara-Rey, O., P5636  
Cambou, J.P., P436, P631, 1950, 3530  
Cambronero, F., P3266  
Cameli, M., P1490, P4470  
Cameron, J.D., 1261  
Cameron, P., P5687  
Cameron, V.A., P541, P1697  
Camici, G.G., P2107, P3944, P3947, P5385, P5418  
Camici, P.G., 390, P4744, 5132  
Caminiti, G., P1678, 4962  
Camino-Lopez, S., P4604  
Camm, A.J., P531, P2070, P2148, P4189, P4852, P5381, P5382, P5552  
Cammarata, S., P823  
Campagna, G., P794  
Campan, M., P1712, P2264, P4508  
Campana, C., 5039  
Campanile, A., 2917  
Campbell-Cole, C., P799  
Campelo, F., P3854  
Campian, M.E., P3238  
Campiglia, P., 2917  
Campo Perez, R., P1500  
Campodonico, J., P3184  
Camporeale, A., P3260  
Camporotondo, R., P1266, P5343  
Campos, A., 2047  
Campos, D.H.S., P1696, P1702, P1708  
Campos, J., P802  
Campos, O., P4794

- Campuzano, O., P4685, 5121, P5549  
 Can, M.M., P1584, P1600, P1605, P1611, P5322, P5325  
 Canale, M.L., P4931  
 Canario-Almeida, F., P2491, P4530  
 Cancarini, G., P4910  
 Candeias, R., P2453  
 Candell Riera, J., P4058  
 Candemir, B., P1539  
 Candia, R.C., P4567  
 Candido, G.O., P2484, 4961  
 Caneda-Villar, C., P1449, P5530  
 Canevese, F., P5641  
 Cannavo, A., P1686  
 Cannistraci, C.V., P5317  
 Cannon, C.P., P696, P1735  
 Cano, L., P3167, P4231  
 Canoui-Poitrine, F., P5443  
 Canteli Alvarez, A., P841  
 Cantin, B., P2523  
 Cantinho, G., P4579  
 Cantoni, S., P4508  
 Canzonieri, V., P1263  
 Cao, K., P3308  
 Cap, M., 5116  
 Capan, D., P3813  
 Caparros, C., P4784  
 Capati, E., P3893  
 Capeau, J., 5003  
 Capewell, S., P5523  
 Caplice, N.M., 5137, P5265  
 Caplin, J.L., P4079  
 Capodanno, D., P1510, P2066, P4033, P4722  
 Capogrossi, M.C., 1155, P1314  
 Caponi, G., P3021  
 Caporale, R., P5472  
 Caporotondi, A., P4232  
 Cappelli, S., P5567  
 Capra, M., P4879  
 Capranzano, P., P1309, P1316  
 Capretti, G., P1686  
 Capucci, A., 252, 256, P3814, P3815, P4155  
 Caputi, L., P2346  
 Caputo, M., P3893, P4470  
 Caraiola, S., P5660  
 Caralt, T., 5147  
 Carbonari, L., P4620  
 Carbone, A., P3313  
 Carbone, I., P470  
 Cardiga, R., P4853  
 Cardin, S., P531, P5382  
 Cardinale, D., P1305, P2479  
 Cardona, A., P4688  
 Carerj, S., P602, P2174, P2184, P4473  
 Caretta, G., P3001, P4691  
 Carey, M., P848  
 Cariou, A., P3809, P3810, P4158  
 Carleton, A.J., 3529  
 Carli, F., P4571  
 Carli, P., P3809  
 Carlier, S.G., P875, P5453  
 Carlino, M., P1544, P4128  
 Carlomagno, G., P2496  
 Carlos Fernandez-Pereira, C., P1501  
 Carlson, C.R., P824, P1438  
 Carluccio, A., P1678  
 Carluccio, E., P3348  
 Carmeliet, P., 3779, P3913  
 Carminati, M., P510, P2346, P4814  
 Carmo, P., P611, P1456, P1640, P1642, 1960, P3321, P5463  
 Carnevalini, M., P2310  
 Caron, M., 5003  
 Carothers, D., P2273  
 Carpeggiani, C., P537, 1106, P3237  
 Carpenter, J.P., P3285  
 Carpentier, A., P2395  
 Carrabba, N., P665, P3023, 4950  
 Carrageta, M., P2403, P5344  
 Carranza, C., P4122  
 Carre, F., P600, P601  
 Carrel, T., P2414, P3797, P4777, P5256  
 Carrie, D., P1463, P1608, P4740  
 Carrier, D., P4735  
 Carrier, M., P2523  
 Carrillo, E., P457  
 Carrillo, X., P1721, P4219  
 Carrington, M., P3798, P4877  
 Carrington, M.C., 124, 4981, P5528  
 Carrizo, L.R., P2310  
 Carro, A., P4731  
 Carroll-Hawkins, C., P5684  
 Carruthers, K., 888  
 Carson, P.E., 5041, 5049  
 Carteaux, J.P., P2329  
 Carteaux, J.P.C., P4110  
 Carter, A.M., P2102, P2104  
 Carter, E., P1697  
 Carter, J., P5284  
 Cartier, R., P1373  
 Cartwright, E., P1423, P3384  
 Carubelli, V., P3830  
 Caruso, R., P2184  
 Caruso, V., P3028  
 Carvalhais, C.H.V.B.G., P583  
 Carvalho, A.C., P3853, P3939, P4610  
 Carvalho, A.C.C., P4794  
 Carvalho, M., P3024, P4579  
 Carvalho, R.F., P1702  
 Carvalho, S., P774, 1825, P5496  
 Carvounis, C.P., P5539  
 Carzaniga, C., P3402  
 Casabe, J.H., 1912, P2468, P5578  
 Casadei, B., 1239, P4868  
 Casadei, I., P585  
 Casado, R., P2095  
 Casali, V., P655  
 Casalino, R., P4091  
 Casalta, J.P., P4124  
 Casamassimi, A., P3946  
 Casani, L., P3207, P4604  
 Casares Mediavilla, J., P2305  
 Casasnovas, J.A., 883  
 Casazza, F., P735, 5186, 5188  
 Cascant, P., P4036  
 Cascon, M., P744  
 Case, J., 398  
 Casella, M., 2776, P3260, P4861, 5063, P5611  
 Casella-Filho, A.C.F., P2263  
 Casini, A., P5472  
 Casini, C., P4598  
 Casini, S., P567  
 Casiraghi, C., 151  
 Caso, P., P751, P2174, P3896  
 Cass, A., 1018  
 Cassater, D., P1688  
 Casselman, F., 340, P3345  
 Cassese, M., P794  
 Cassese, S., P4084, P4719  
 Cassidy, P., P2471, P2473  
 Cassini, P., 5039, P5671  
 Cassone, A., P3834  
 Castagno, D., P2477  
 Castaldi, B., P2370  
 Castaldo, C., P2972, P3061, P3065, P3076  
 Castaldo, D., 1248, P3948  
 Castaneda, J., P3854  
 Castel, M.A., P5691  
 Castellani, G., P5477  
 Castellano, M., P549  
 Castellant, P., P4241, P4840, P5599, P5625  
 Castelli, C., P1492  
 Castello, A., 5046  
 Castelvecchio, S., P851  
 Castillo Dominguez, J.C., 1951, P2305  
 Castrejon Castrejon, S., P3842, 5011  
 Castrillo Bustamante, C., P841  
 Castro, A., P4784, P4786, 5161, P5492  
 Castro, G., P711, P734, 5185  
 Castro, R., P1456  
 Castro, V., P1666  
 Castro Beiras, A., P596, P641, P1499, P1500, P3186, P3848, P4254  
 Castro-Beiras, A., P840, 2047, P2980, P3253, P5285, P5350  
 Castro-Chaves, P., P3358  
 Castro-Chaves, P.M., P818  
 Casu, M., P5669  
 Catalano, M., P4473  
 Cataliotti, A., P810  
 Catanzaro, R., P4215, P4247  
 Catapano, O., P4738, P5267  
 Catez, E., P4257  
 Cati, A., P584  
 Catrina, S.B., P3003  
 Cattaneo, P., P853  
 Cattle, B.A., 988, 1797  
 Caudron, G., P506  
 Cauliez, B., P5260, P5262  
 Cavaco, D., P1640, P1642, P2453, P2454, P2463, P3321  
 Cavaco, S., 5236  
 Cavagnini, F., P3402  
 Cavallaro, C., P751, P3896  
 Cavallero, A., P1305  
 Cavallini, C., P519, P3177, P4508, P5292  
 Cavana, M., P2178  
 Cavarretta, E., P2409  
 Cavazzini, D., P795  
 Cavusoglu, Y., P1723  
 Cavuto, F., P4837  
 Cayla, G., 1800, P3852, 5200, 5207  
 Cayli, S., P873, P3980  
 Cazaux, P., 4989  
 Cazeau, S., P5616  
 Cazenave, J.P., P2090  
 Cazon, L., P3253  
 Cazzaniga, M., 151  
 Cea-Calvo, L., P2272  
 Cebria, A., P606  
 Cebrian, A., 4991  
 Cecchi, E., P4116  
 Cecchi, F., P3273  
 Cech, J., P1368  
 Ceck, C., P5659  
 Ceconi, C., 5052  
 Cedano, J., P1645, P3314, P4170, 5213  
 Cederholm, A., P4658  
 Cederholm, I., 2821  
 Cedro, K., P5542  
 Ceglia, M., P2150  
 Ceia, F., P4853  
 Cekmen, M., P1290  
 Celada, J., 5244  
 Celebi, O., P5624  
 Celeiro, M., P5344  
 Celermajer, D.S., P726, P3986  
 Celestini, A.C., P5677  
 Celli, S., P3052  
 Celik, S., P2524  
 Celikel, T., P5365  
 Celikyurt, Y.U., P5598  
 Celorrio, V., 1114  
 Cemerlic Adjic, N., P2312  
 Cencarik, J., P868  
 Cengel, A., P832  
 Centola, M., P1338  
 Ceolotto, G., P3971  
 Cequier, A., P4731  
 Cera, M., P2504  
 Cerbai, E., P409, P567, 1238, P3087, P3273, P3386, 5052  
 Cerda, M., P3021  
 Cerene, A., P4740  
 Ceriello, A., P2210  
 Cerin, G., 335  
 Cerisano, G., P665, 4950  
 Cermakova, Z., P425, P2987  
 Cernelc, P., P5692  
 Cernohous, M., P1729  
 Cerqueira, M., 397  
 Cerqueira, R., P818  
 Cerquetani, E., P585  
 Cerrito, A., P1678  
 Cerutti, A., P2383  
 Cervi, E., P5618  
 Cervinka, P., 2924  
 Cervinka, P.C., 2924  
 Cervio, E., 5138  
 Cesar, L.A., P538  
 Cesar, L.A.M., P534, P2957, 5189  
 Cesari, F., 155, P2409, P4109, P4123, P5472, P5499

- Cesaroni, G., P1719  
 Cesena, F.H.Y., P2256, P2263, P2274  
 Cezar, L.A.M., P2069, 5238, P5480  
 Cezar, M.D.M., P1696  
 Chabaneix, J., P4787  
 Chabrilat, Y., P5582  
 Chachques, J.C., P850  
 Chacko, G., P5308  
 Chacko, S., P1554  
 Chacra, A.P., P2271  
 Chadjichristos, C.E., 5139  
 Chadwick, R.J., P4643  
 Chae, C.U., 169  
 Chae, I.-H., P2108  
 Chae, S.C., P420, P2982, P2992, P4533, P4676, P5370, P5415  
 Chagas, A.C.P., P2263  
 Chahal, N.S., P496  
 Chaidaroglou, A., P3251, P5674  
 Chairpromprasit, J., P2351  
 Chakor, H., P805  
 Chakrabarti, S., 2004  
 Chakroun, T., P1326  
 Chalah, C., P511  
 Chalak, W., P3119  
 Chalikias, G., 898, P2488, P4208  
 Chalil, S., P5643  
 Challenor, V.F., P4513  
 Chalmers, J., 150, 1018  
 Chamaidi, A., P2144  
 Chamandi, C., P4863  
 Chambers, J., P5482  
 Chambers, J.C., P496, 1151, P4645, P5394  
 Chamone, D., 5238  
 Chamontin, B., 1950  
 Champagne, S., P2134  
 Champion, H.C., P5700  
 Chan, C., P4551, P4618  
 Chan, C.P., P664  
 Chan, C.W.S., 1250, P1336  
 Chan, H.T., P478, P1482, P3153, P4672, 4968  
 Chan, M., 2672  
 Chan, S., P4002  
 Chan, W.C., P3145  
 Chan, W.K., P785  
 Chan, W.S., P1335  
 Chan, Y.H., P3339  
 Chandanamattha, P., P3335  
 Chandra, N., P600, P2508, P2520, P3124, P4239  
 Chandrasekaran, B., P831  
 Chandy, S.T., P5560  
 Chang, B.C., P3109  
 Chang, D., P760, P1631, P2420  
 Chang, H.-J., P4647  
 Chang, H.J., 1258, P5629  
 Chang, K.-C., P2261  
 Chang, L.T., P3100  
 Chang, M., P4075  
 Chang, P.-Y., P2229, P2261  
 Chang, S.-A., P487, 5095  
 Chang, S.G., P5410  
 Chang, Y.C., P4008  
 Channer, K.S., P4664  
 Channon, K., P4868  
 Channon, K.M., P2311, P5421  
 Chao, T.-H., P2195, P5374  
 Chao, Y., P4607  
 Chapaeva, N., P4108, P5558  
 Chaparro, M., P4784, 5161, P5492  
 Chapelle, C., P698  
 Chapman, C., 5009  
 Chapman, M.J., P5444  
 Chapuis, L., P2978  
 Charakida, M., P5420  
 Charalampopoulos, A., P5251  
 Charbonneau, E., 5237  
 Charlton, R.K., P1309  
 Charlton, S.B., P3315  
 Charlton, T.A., P3315  
 Charoenpanichkit, C., P3335  
 Charpentier, S., P1291  
 Charron, P., 2918, P3058  
 Charter, K., 2647  
 Chartier, D., 3660  
 Charwat, S., P5405  
 Chassaing, S., 4989  
 Chastre, T., 1800  
 Chattipakorn, N., P4680  
 Chatzikyriakou, S., P2488, P4208  
 Chatzis, D., P607, P879, P1443, P2535, 2644, P3146, P3931, P3990, P3993, P4023, P4253, P4270, P4682, P4922, P4928, P5708  
 Chatzistamatiou, E., P634, P4009, P4907, P5711  
 Chatzizacharias, A., P460  
 Chatzizisis, Y.S., 899, P1477, P4069, P4602, P4619, P4760  
 Chatzopoulos, D., P3208  
 Chau, V., 1154, P2124  
 Chauvin, M., P1307, P1312, 2775  
 Chavakis, E., P4478  
 Chazelle, F., P2253  
 Cheah, F.K., P1365  
 Cheaito, R., P1326  
 Chechi, T., P699  
 Chee, S., P4724  
 Chello, M., P4534  
 Chen, C.-H., P2261  
 Chen, C.Y., P3390  
 Chen, G.P., P3963  
 Chen, H., P810, P3153, 5060  
 Chen, H.C., P3149  
 Chen, H.H., P1425, P2490, 3774  
 Chen, H.Y., P520, P2363  
 Chen, H.Z., P520, P2363, P5574, P5597  
 Chen, I.J., P1403  
 Chen, J., 152, P856, P858  
 Chen, J.-H., P2195, P5374  
 Chen, J.W., P4529  
 Chen, K., P1738  
 Chen, L., P5460  
 Chen, M., P2519  
 Chen, M.F., P3390  
 Chen, P., P5574  
 Chen, R., P1444, 2671, P3844, P5574, P5597  
 Chen, S., P2388  
 Chen, S.S.M., 2002  
 Chen, W., P5305, P5407  
 Chen, X., P1622  
 Chen, Y., P475  
 Chen, Y.-J., P2229, P2261  
 Chen, Y.S., P703, P4150  
 Chen, Z.M., P475  
 Chenevez, P., P1648  
 Cheng, H., P5718  
 Cheng, J.M., P2338, 4949, 5204  
 Cheng, X.W., P1361  
 Chenoune, M., P4494  
 Chenu, P., P3228  
 Cheriaa, S., P4042  
 Cherif, A., P5259  
 Cherniavskiy, A., P3091, P3097, P5601  
 Cheruvu, C., P677  
 Chesler, N., 5169  
 Chessa, M., P510, P4814  
 Chetaille, P., P5549  
 Chetboul, V., P2474  
 Cheung, S.C.W., 1250, P1335, P1336  
 Chevalier, B., P671  
 Chevalier, P., P1392  
 Chew, D.P., P5461  
 Chew, E.W., P5609  
 Chi, N.H., P703  
 Chia, S., P5310  
 Chiacchia, F.S., P5422  
 Chiang, C.K., P3203  
 Chiang, F.T., P4008  
 Chiari, E., P2416  
 Chiarriello, M., P1408, P1686, P2191, P4000, P4084, P4719, P5406, P5517, P5527, P5534, P5540  
 Chiatto, M., P4223  
 Chiba, N., P3818  
 Chieffo, A., P1544, P4128, 5196  
 Chieffo, E., 2050, P3860  
 Chiellini, F., 1245, P2198, P5514  
 Chierchia, G.B., 1110  
 Chigogidze, N.A., P415  
 Chikamori, T., 400, P4573, P4747  
 Chiladakis, J., P2138  
 Child, A., P5543  
 Child, A.H., P2148, P5552  
 Chilingaryan, A.L., 5048  
 Chimenti, C., P1265, P3271  
 Chin, D., P5612  
 Chin, S., P2273  
 Chin Quee, S., P1512  
 Chin-Dusting, J., 2648, P3942  
 China, P., P5579  
 Chinaglia, A., P5571  
 Ching, C.K., P5427  
 Chio, J.H., P2172  
 Chiolero, A., P2292  
 Chipperfield, R.A., P1734  
 Chiricolo, G., P4087  
 Chirillo, F., P4109, P4116, P4123, 5195  
 Chittari Macharotu, M.S.V., P2210  
 Chitty, C., P2508  
 Chitu, M., P2132  
 Chiu, C.C., 339  
 Chiu, J.F., P3141  
 Chiu, Y.W., P4860  
 Chiurlia, E., P3994, P4003  
 Chizzola, P.R., P5699  
 Chlorogiannis, I., P2321  
 Chlouverakis, G., P3242, P5725  
 Chmiel, A., P2239, P5321  
 Chmielak, Z., P4139  
 Cho, C.-L., P2195  
 Cho, D.K., 1096  
 Cho, G., P1576  
 Cho, G.Y., P3938  
 Cho, I., P4647  
 Cho, J.G., P543, P2436, P2993, P3093, P4152, P5358  
 Cho, J.G.C., 1111  
 Cho, J.H., P2289  
 Cho, J.R., P5266  
 Cho, K.I., P730, P1457  
 Cho, M.C., P420, P2982, P4533, P4676, P5370, P5415  
 Cho, S.Y., P1511  
 Cho, Y.H., P4466  
 Cho, Y.K., P2142, P3216, P4168, P4184  
 Chochoła, M., P522  
 Chockalingam, A., P3991  
 Chodor, P., P2133, P2343, P3143  
 Choe, H.M., 2673  
 Choe, K.H., P2091, 2673, 3558, P4648, P4651  
 Choi, B.J., P1380, P1553, P4016  
 Choi, C.Y.S., 5106  
 Choi, D., P1511  
 Choi, D.-J., P2108, P4647  
 Choi, D.H., P4066  
 Choi, D.J., 1258, P3938  
 Choi, E.-K., P487  
 Choi, I.S., P1515, P4535, P5400  
 Choi, J.H., 1096, P5354  
 Choi, J.I., P3900  
 Choi, J.O., P4118  
 Choi, J.Y., P5410  
 Choi, K.J., 1109  
 Choi, S.H., 1096, P4118  
 Choi, S.I., 1258, P5629  
 Choi, S.Y., P1380, P1553, P4016  
 Choi, U.J., P1553  
 Choi, W.G., P5323  
 Choi, Y.-S., P487  
 Choi, Y.J., P5266  
 Chojnowska, L., P3262, P4139  
 Chojnowska, L.S., P1567, P3274  
 Chonchol, M., P5524  
 Chong, E., P627  
 Chong, N.W., P1405  
 Choo, A., 2018  
 Chopard, R., P521, P2098, 2823, P2935, P3856, P4037, 5209  
 Chorro, F.J., P430, P606, 3567, P4725, 5112  
 Chou, W., P2519  
 Chouchene, S., P1326  
 Choudhry, F., P3257  
 Choudhury, A., P2494  
 Choudhury, R.P., P3988, P4542

- Chouraqui, P., P1362  
 Choussat, R., P431, P2083, P4716, P5276  
 Chow, D., 5086  
 Chow, V., P677  
 Chris, G., P5282  
 Christ, A., P4878  
 Christ, M.C., P765  
 Christen, A., P850  
 Christensen, A.C., 5146  
 Christensen, G., P824, P1410, P1438, P1674  
 Christensen, J.H., P5702  
 Christenson, R., P823, 1098  
 Christian, C., P4545  
 Christiansen, E.H., P4714  
 Christiansen, J.S., P4816  
 Christie, L., 5040  
 Christodoulakos, G., P5446  
 Christoph, J., P1693  
 Christophersen, T.B., P2171  
 Christov, F., P4798, P4800  
 Chromik, K., P2315, P3918, P4561, P4834  
 Chronos, N., P4603  
 Chrostowska, M., P3139  
 Chrustowicz, A., P753, 2772  
 Chrysohoou, C., P468, P859, 1014, P1486, P1489, P2228, P3126, P3981, P4217, P4692, P4919, P5667, P5703  
 Chu, Z., P760  
 Chua, L.H., P2177  
 Chua, S., P3100  
 Chua, S.K., P3109, P4539  
 Chua, T., P1365  
 Chuah, S.C., P833  
 Chuang, L.M., P4008  
 Chuapali, Y., P3901  
 Chun, E.-J., P4647  
 Chun, E.J., 1258  
 Chun, J., P2429  
 Chun, K.J., P757, P4832  
 Chun, K.R.J., P1644  
 Chung, D.R., P4118  
 Chung, I., P2460  
 Chung, N.S., P4066  
 Chung, W.J., P1515, P4535, P5400  
 Chung, Y.-L., P5381, P5382  
 Chuprova, S., P4165  
 Chuvilina, M., P4693  
 Chwyczo, T., P609, P4859  
 Chybowska, B., P4917  
 Ciampi, Q., P1711  
 Cianflone, D., P4675, P5317  
 Ciardetti, M., P1355  
 Ciarka, A., P727, P857, P5633  
 Ciavarella, M., 1124  
 Ciccarelli, M., 1019  
 Ciccarese, C., P3830  
 Cicchitti, V., P654, P4937  
 Ciccone, M.M., P5338  
 Cicek, G., P3195  
 Ciceri, F., P1305  
 Cicha, I., P467, P3958, P4063  
 Cichon, T., P3080  
 Cicogna, A.C., P1696, P1708  
 Cicoir, M., P835, P1688, P4098  
 Cicorella, N., P1300, P1551, P4532  
 Cid, B., P5603  
 Cid Alvarez, A.B., P441  
 Cifkova, R., 1017, P5494  
 Cihak, R., P3324, 5107  
 Cikes, I., P3796  
 Cikes, M., P3796  
 Ciliberti, P., 344, P3236, P3239  
 Cimadevilla, C., P4099  
 Cimbaro Canella, J.P., P4223  
 Cimen, A., 3568  
 Cimminiello, C., P5539  
 Cimmino, G., 892, P2113, P3377, P5407  
 Cinca, J., P564, P578, 1240, 2773, 2778, P4207  
 Cincotta, G., P685, P2066  
 Cingolani, H.E., P4943  
 Cinteza, E., P4271  
 Cinteza, M., 335, P507, P3354  
 Cinti, L., P423, P424, P3858  
 Ciobanu, N., P1409  
 Cioffi, G., P4100  
 Cioppa, A., P1265  
 Cioppa, C., P3896  
 Ciosek, J., P3068, P3089  
 Ciotola, M., P2210  
 Cipolla, C.M., P1305, P2479  
 Cipolletta, E., 1019  
 Cipolli, J.A., P2530, P3403, P4942  
 Ciricugno, S.A., P4204  
 Cirillo, P., P4084, P4719  
 Ciszewski, A., P3128  
 Citro, R., P1266, P1565, 5130, P5645  
 Cittadini, A., P2240, P2496  
 Citterio, F., P2953  
 Ciuffreda, C., 5138  
 Ciurzynski, M., P704  
 Ciuti, G., P1592  
 Civaia, F., P852  
 Civeira, F., 883  
 Civelli, M., P2479  
 Civil, J., 3531  
 Cladellas, M., P4094  
 Claes, B., P3913  
 Claessen, B.E.P.M., P2938  
 Claessens, C.W.F., P1715, P3894, P4522  
 Claessens, J.E.J., P1715, P3894, P4522  
 Claessens, M.C.F., P1715, P3894, P4522  
 Claessens, M.M.M., P1715, P3894, P4522  
 Claessens, P.M.J., P1715, P3894, P4522  
 Claeys, M., P2936  
 Claeys, M.J., 5111, 5153  
 Clague, J.R., P767  
 Clark, A.L., P811, P845, P4214, P4894  
 Clark, D., 2647, P5481  
 Clark, D.J., 4951  
 Clark, P.C., 123  
 Clarke, B., P1554, P2366  
 Clarke, R., 980, 3534  
 Claudel, J.P., P2112  
 Claus, P., P1342, P1607, P5330  
 Claustres, M., P5546  
 Clavel, M.-A., P3792, P4092  
 Cleland, J., P4205  
 Cleland, J.G.F., P811, P845, P4214, P4894  
 Clemente, C., 2015  
 Clemente, M., P4196  
 Clementi, F., P4087  
 Clementino, N.C.D., P1695  
 Clements, S., P821  
 Clementy, J., P5627  
 Clemmesen, P., 287, P1299  
 Clerc, J., P2517  
 Clerico, A., P5368  
 Clevers, H., P1428  
 Clift, P., 5179  
 Climent, V., 1211, P1641, P3266  
 Clopton, P., P816, P823, 1098  
 Co, M., P4724  
 Coats, A.J.S., P2493  
 Cobain, M.R., 3531  
 Cobbe, S.M., 241, P553, P4220  
 Cobelli, C., P3971  
 Cobo, M., P1422, 2920  
 Cobo Belaustegui, M., P841  
 Cobo Sanchez, J.L., 5013, 5016  
 Coca, A., P4254, P4938  
 Coceani, M., P537, 1106, P1355, P3237, P3833  
 Coch, C., P5402  
 Cochet, A., P1373, P3847  
 Cockle, S., 1798, P3125, P5476  
 Codazzi, C., P486  
 Codd, V., P542  
 Coelho, O.R., P2256, P4019  
 Coghlan, G., P1596  
 Coghlan, J.G., P1575  
 Cohen, A., P2977, P4190, P4257, 5003  
 Cohen, C., 2775, P3353  
 Cohen, E.A., P3141  
 Cohen, I., P2395  
 Cohen, M., P1670  
 Cohen, M.G., P686  
 Cohen, R., P2134  
 Cohen Arazi, H., P2310, 5244  
 Cohen-Solal, A., P1718, P2493, P2521  
 Cohn, J.N., 1099  
 Coimbra, S.R., P2274  
 Coirault, C., P3058  
 Cokkinos, D., P867, P2268, P2527  
 Cokkinos, D.V., P2149, P2947, P4162, P5576, P5664, P5674  
 Cokkinos, P., P4162  
 Colangelo, G., P794  
 Colkesen, B.E., P3123  
 Coll, R., P3167  
 Coll-Barroso, M., P4902  
 Collante Bohle, M.A., P3037  
 Collart, F., P4124  
 Colles, P.H., P3228  
 Collet, J.-P., P1333, P2083, 5200  
 Collet, J.P., P431, P1301, 1800, P2090, P2112, P3852, P4716, 4989, 5207, P5276, P5296, P5301  
 Collins, H.E., P4638  
 Collins, R., P475  
 Collins, S.P., P816  
 Collinson, P., P5673  
 Collinson, P.O., P2072  
 Colod-Beroud, G., P5546  
 Colman, J.M., P4763  
 Colmenarez, H., P4734  
 Colmenarez, H.J., P1543  
 Colombo, A., P1544, P2087, P2479, P3176, P3201, P4050, P4128, P4130, P4144, 5156, 5196, 5197  
 Colombo, F., P4057  
 Colombo, M.G., P3237  
 Colombo, N., P2479  
 Colonna, D., P4534  
 Coluccia, G., P2358  
 Com, O., P1346  
 Coma-Canella, I., P1518  
 Comberg, T., P4053  
 Combes, X., P4158  
 Combescure, C., P1492  
 Comeglio, P., P5552  
 Comenale Pinto, S., P751  
 Comerci, G., 5077  
 Cominacini, L., P2278  
 Comini, L., 5052, P5471  
 Comito, C., P407  
 Commeau, P., 4991  
 Commissaris, K., P1508, P4076  
 Committeri, G., P1478  
 Compare, A., P1564  
 Compare, A.C., P3172  
 Compostella, L., P584, P2948  
 Comtois, P., 3660  
 Conard, J., 1954  
 Conard, S., P2254  
 Conca, C., P1707, P2161, 5067  
 Conceicao, I., P4579  
 Conen, D., 169, P5445  
 Conficoni, E., P722, P1571, P1598, 5172  
 Cong, P., P760  
 Conley, P., 5115  
 Conley, P.B., 2678  
 Connell, J.M.C., 240, P821  
 Connelly, K.A., P3084  
 Connolly, D.L., P1504, 5152  
 Connolly, S.B., P582, P594  
 Connolly, S.J., 1914, P2447, 2779, 2781, P4847  
 Conraads, V., P1411, 4960, 4965  
 Conraads, V.M., P2949  
 Consoli, C., 4962  
 Constantinesco, A., 5069  
 Consuegra Sanchez, L., P3848  
 Conte, L., P795  
 Conte, M., P697  
 Conthe, P., 5004  
 Conti, A., 236  
 Conti, L., P3332  
 Conti, M.G., P4526  
 Contine, A., P5292  
 Contini, P., P4616  
 Contre, C., P1718, P2521  
 Convens, C., 5111, 5153  
 Conversano, A., P2419  
 Convert, G., 5149

- Cook, S., P4028  
 Cook, S.A., 5132  
 Cooney, M.T., 129, P3979, P5452, P5458  
 Cooper, P., 245  
 Cooter, N., P4643  
 Copelli, S., P1713  
 Coppess, M.A., P3315  
 Coppini, D.V., 2870  
 Coppini, R., 1238, P3273  
 Coppola, G., P4644  
 Coppolino, G., 384  
 Corazzini, A., P654, P4050  
 Corbascio, M., P3071  
 Corbellini, C., P549  
 Corbetti, F., P1267, P3173, P3261, P5579  
 Corbi, G.M., P5681  
 Corbi, M., P4540  
 Corbisiero, R., P839  
 Corciu, A.I., P5249  
 Cordero, A., 883, 5004  
 Cordero, M., P1330, P5691  
 Cordiano, R., P4837  
 Cordier, J.F., P1587, P4892  
 Cordisco, A., P1325  
 Corlan, A.D., P3046  
 Cornel, J.H., 401, P3006  
 Cornelio, M., P2530  
 Cornelussen, R.N., 1922  
 Cornillet, L., P5586  
 Cornily, J.-C., P2074, P2234  
 Corona, F., P4775  
 Corrada, E., P3217, P5299  
 Corrado, D., 1115, P1267, P3261  
 Corrado, E., P4644  
 Corral, J., 1953  
 Correa De Sa, D., 5060  
 Correale, M., P2150, P4191  
 Correia, A., 1149, 2677, 2679, P2960, P3002, P3193, 4977  
 Correia, E., 1107  
 Correia, E.B.C., P4567  
 Correia, M.J., P3270, P4579  
 Corsani, I., P5472  
 Corseaux, D., P5564  
 Corson, N., P4213, P4240  
 Cortes, M., P3842  
 Cortes, R., P3387, P4259  
 Cortese, B., P4759  
 Cortez-Dias, N., P1455, P2295, P2544, 2652, P3150, P3270, P4579  
 Corti, R., P1372, P2077, P3094, P4659  
 Cortigiani, L., P1528, 2048, 2867, P3885, P3889, P3890  
 Cortina, J., P718, P723  
 Cortinovis, S., P1356, P1357  
 Corvaja, N.C., 1011  
 Cosentino, F., 384, P2207  
 Cosentino, M.A.C., P4567  
 Cosentino, N., P697, P1271  
 Cosin-Sales, J., P4773, P5398  
 Coskun, A.U., 899, P4069, P4602, P4619, P4760  
 Cossu, L., P2174  
 Costa, A., 1107  
 Costa, F.F., P3806  
 Costa, G.M., P3156  
 Costa, J., 1149, P3002, P3193, 4977  
 Costa, L.C.O., P1696  
 Costa, M., P4072, P4076, 5211  
 Costa, R., 1925  
 Costa, S.P.L., 1925  
 Costa-Pereira, A., P2491, P4530  
 Costagliola, D., P2977, 5207  
 Costantino, M.F., P513  
 Costanzo, P., P4116, P5540  
 Costard-Jaeckle, A., 5158  
 Costerousse, O., P3092  
 Cotrim, C., P2403, P5344  
 Cotrufo, M., 904  
 Cotel, D., 884, 2650, 3540, P4657  
 Cotter, G., 1101, P2486, P2489, 2763, P4252, P5658  
 Cotterill, D., 249  
 Cottin, Y., P618, 1950, P3847, P3859, P5316  
 Cottini, M., P515  
 Cotton, J., P2089  
 Couade, M., P479  
 Coucello, J., P877, P1538, P4941, P5357  
 Couffinhal, T., P2961, P3127  
 Coulombe, N., P754  
 Coulter, T., P5362  
 Cournot, M., P1291  
 Coussement, P., P2936, 5111  
 Couture, E., P4491  
 Couvreur, N., P2474, P4494  
 Covello, R.D., P4130, 5156  
 Covic, A., P825  
 Coviello, I., P2226  
 Covino, E., P4534  
 Covolo, L., P1659, P5638  
 Cowey, P., P4852  
 Cowie, M.R., P831, P2457, 5009  
 Cox, D.A., P3850  
 Cox, M.G., P2140, P3265  
 Cox, R., P3384  
 Cozar, R., P3299  
 Cozma, A., P3984  
 Cozma, D., 2052  
 Cozma, D.C., P414  
 Cozzi, R., P3402  
 Cozzio, S., 160  
 Cozzzone, P.J., P3032  
 Craciunescu, I., 1999  
 Craig, S., P4542  
 Craiu, E., P2092  
 Cramariuc, D., P865, P4100, P4106  
 Cramer, M.J., P599, 2051, P2140, P3265, P4696, P4887, 4975, 4976, P5646  
 Cramer, M.J.M., P5656  
 Cransac, F., P4107  
 Crea, F., P461, P597, P662, P697, 1155, P1271, P1314, P2226, 2776, P3260, P3834, P4001, P4578, P4861  
 Cremer, J., P4127  
 Cremer Luengos, D., P788  
 Cremers, B., P1516, P3206  
 Crepaldi, C., P4761  
 Cresci, M., P5547  
 Crespo-Leiro, M.G., P840  
 Cribier, A., P5260, P5261, P5262  
 Cricco, A.M.C., 1011  
 Crijns, H., P1498, P4852, P5495  
 Crijns, H.J.G.M., P575, P623, P630, P1375, 2779, 2781, P2981, 3650, P3891  
 Crijns, J.G.M., P4185  
 Crimi, E., P4598  
 Crimi, G., P3222  
 Crisa, S., P2431  
 Cristell, N., P4675, P5317  
 Crivellari, D., P1694  
 Crochet, D., P2347, P4056  
 Croisille, P., P3870  
 Cronin, E., P848  
 Crossett, M.P., 1261  
 Crouzet, C., P705  
 Crowley, J., P834  
 Crowther, N., P5588  
 Crudele, V., P4623  
 Cruz, A., P4734  
 Cruz, D., P5420  
 Cruz Fernandez, J.M., P3848, P4784, 5161, P5492  
 Cruz-Adalia, A., P5584  
 Cruz-Gonzalez, I., P744  
 Csanady, M., P3280  
 Cseko, -, P1725  
 Cubbon, R.C., 242  
 Cubedo, J., P3007  
 Cubukcu, A.A., P1494  
 Cucchi, G., P2518  
 Cucchini, F., P4837  
 Cuculo, A., P4191  
 Cuff, C., P4099  
 Cuellar, H., 1007, P5355  
 Cuellar, H.C., 1008  
 Cuellar Calabria, H., P4089  
 Cuenca-Castillo, J.J., P840  
 Cuesta, A., P3292  
 Cugola, D., 3646  
 Cui, L., P3954  
 Cuilleret, F.J., P2204  
 Cuisset, T., 5117, 5119  
 Cuko, A., P2455  
 Cung, T.T., P5586  
 Cunha, P., P5600  
 Cunnington, C., P3988  
 Cuono, C., P1606  
 Curnis, A., P772, P1659, P5638  
 Curotto, V., P4555  
 Currie, B., P3140  
 Curtis, N., 245  
 Curtis, S., P2365  
 Curtis, S.L., 2004  
 Cusack, M., P2089  
 Cusma Piccione, M., P4473  
 Custodio, H., P3888, P5357  
 Custodis, F., P3967  
 Cygankiewicz, I., 2773, 2778  
 Cypiene, A., P3999  
 Czarnecka, D., P477, P872, P3415  
 Czarnecki, A., P494  
 Czarnowska, E., 1125, P1433, P5590  
 Czepluch, F.S., P605, P3111  
 Czernin, J., 398  
 Cziraki, A., P2211  
 Cziraky, M., P2249  
 Cziraky, M.J., P2247, P5409  
 Czolbe, M., P3365, P3366  
 D'Angeli, I., P4560, P4646  
 D'Smith, R., 5167  
 D'Addario, S., P519  
 D'Addio, G., P5681  
 D'Agostino, C., P735, 5188  
 D'Agostino, R.B., 3531  
 D'Alterio, G., P4771, P4781, 5178, 5181  
 D'Alto, M., P4771, P4781, P4785, 5169, 5178, 5181, P5343  
 D'Amati, G., P3386, P4744  
 D'Ambrosio, A., P3232, P4703  
 D'Andrea, A., P5343  
 D'Andrea, C., P5517  
 D'Angeli, I., P1281  
 D'Angelo, A., 5104  
 D'Angelo, L., P782  
 D'Anna, C., P5517  
 D'Armini, A.M., P712, P735  
 D'Elia, E., P655  
 D'Errico, A., P1528, 2866  
 D'Este, D., 160  
 D'Hooge, J., P483, P485, P1342, P1607, P2183, P5330  
 D'Onofrio, A., P751, 3646  
 D'Orazio, N., P4674  
 Da Costa, A., P5620  
 Da Luz, P.L., P2274  
 Da Pozzo, E., P1273  
 Dabbah, S., 338, 1145  
 Dabbous, O., P1738  
 Dabrowska-Kugacka, A., P4171  
 Dabrowski, M., P1567, P3274, P3977  
 Dabrowski, P., P756  
 Dabrowski, R., P609, P4859  
 Daburger, A., P2344  
 Dada, S., P3119  
 Daemen, J., P2100  
 Dagenais, F., 5237  
 Daghini, E., P3414  
 Dagorn, P., P1392  
 Dagres, N., P4854  
 Daha, I., P4649, P5660  
 Daha, I.C., P3995  
 Dahdah, N., P2377, P2379  
 Dahdouh, Z., P4857  
 Dahl, A., 4973  
 Dahl, C.P., 243, P1674  
 Dahl, M.B., P824  
 Dahlbom, I., P4658, P4661  
 Dahlof, B., P863, P866, 1015, 1021, P2542, P5479  
 Dahm, J., 2674  
 Dai, Y.L., P478, 4968  
 Dai, Y.L.E., P1482  
 Dai, Z.K., P1403  
 Daiber, A., P3957

- Daida, H., 284, P4067, P5248  
 Dal Monte, A., 5130, P5645  
 Dal Pai-Silva, M., P1702  
 Dalen, H., P482, P509  
 Dalen, H.D., 2049  
 Dalialis, N., P3975  
 Dalla Costa, A.P., 2015  
 Dalla Man, C., P3971  
 Dallago, M., P4727  
 Dallan, L.A.O., P2069, P2071, 5189, 5191, 5238  
 Dallongeville, J., 884, P2128, P2204, 2650, 3540, P4657, P5722  
 Dalmasso, P., P1330  
 Dalsgaard, M., 287  
 Daluz, P.L., P2263  
 Daly, K., P834  
 Dalzell, J.R., 241, P820, P4220  
 Damatto, R.L., P1708  
 Dambrauskaite, V., P1607  
 Dambrink, J.H.E., P3213, P5264, P5291  
 Damiano, M., 2866  
 Damman, K., P846, P3359, P4212  
 Damy, T., P4214, P4251, P4894  
 Dan, A., P3995, P4649  
 Dan, A.-R., P5660  
 Dan, G.-A., P5660  
 Dan, G.A., P3995, P4649  
 Dan, K., P1514  
 Dancea, A., P2379  
 Danchin, N., P436, P631, P1442, P1492, P1496, P2121, P3836, P3839, 5109, 5149, P5301, P5424, P5467, P5722  
 Dandachli, F., P2093  
 Dandel, M., P489, 1005, 1208, P1581, P1685  
 Dane, F., P3357  
 Dang-Heine, C., P3212  
 Dargas, G., 5196  
 Dargas, G.D., P645, P3850, 5210  
 Dangoisse, V., P3228  
 Daniel, G., P1698  
 Daniel, J.M., P544, P560, 2914  
 Daniel, W.G., P467, P1358, P3868, P3958, P4063, P4564, P5498  
 Danieli, G.A., 1209, P3233, P3250  
 Danieli, P., 5138  
 Daniels, L., 2771  
 Daniels, L.B., P823  
 Danielsen, R., P3135  
 Danielsson, C., P3071, P5556  
 Daniotti, A., P4123  
 Danny Dvir, D.D., P1550  
 Danser, A., 1799  
 Danser, A.H.J., 2003, P3205, P3210, P3968, 4995, P5544  
 Dantas-Carletti, M.S., P4169  
 Danzi, G.B., P4084, P4735, P4775  
 Dao, T.-V., P3960  
 Dao, V.T., P2222  
 Dar, O., 5009  
 Daram, S., P1736  
 Darbar, D., 3776  
 Dardas, P.D., P2350  
 Dargie, H.J., P821, 1254, P2477, P4751  
 Darius, H., P1277, P2096, P2990, P3180, P4721  
 Darladimas, I., P551, P2224, P2539, P3923, P3993, P4258  
 Darladimas, J., P4919  
 Darlington, A., P1309  
 Darrieux, F., P763  
 Dart, A.M., 4951  
 Dartigues, J.F., 133, P624  
 Das, C., P1575, P1596  
 Das, D., P5612, P5619  
 Das, R., P1349, P1374, P5308  
 Das, S., 5132  
 Dasgupta, A., P4733  
 Dashkevich, A., P4142  
 Daskalaki, M., P460, P608, P3404, P4024  
 Dasli, T., P3326  
 Dastros-Pitei, D., P2097  
 Daszkowska-York, J., P1433  
 Daticu, M.D., P3984  
 Datino, T., 3660  
 Daubert, C., 233  
 Daubert, J.C., 237, 238  
 Dauphin, C., P1574  
 Daures, J.P., P1492  
 Davani, S., P3090  
 David, B., P5722  
 David, C., P736, P3270, P3986  
 David, R., 2915, P3082  
 David Brosh, D.B., P1550  
 Davidavicius, G., 3564  
 Davidsen, U., P1556  
 Davidson, M.H., P2287  
 Davies, A.H., 379  
 Davies, C., P1566, P2494, P3281  
 Davies, G., P2250  
 Davies, J.E., 283, 1959, P3855  
 Davies, R., P856, P1742  
 Davies, S., P2514  
 Davis, R.C., 5152  
 Davison Weatherley, B., P4252  
 Davlouros, P., P2138  
 Davoodi, G.H., P490  
 Dawkins, I., 5047  
 Dawkins, K.D., 2933  
 Dawood, A., P1609  
 Dawson, D., P500, P739, P748, P752, P1262, P1612, P3872, 5167, P5362  
 Dbs, A., P4741  
 De Agustin Loeches, J.A., P491, P2304, P5329  
 De Ambroggi, L., P3046  
 De Amici, M., P5641  
 De Angelis, A., P3065  
 De Angelis, K., 4961  
 De Araujo Goncalves, P., P3038  
 De Backer, C., P4752  
 De Backer, G., 153, P594, 1795, P3913  
 De Backer, J., P5545  
 De Bacquer, D., 153, P594, 1795, P5460  
 De Bakker, J.M., P2421, P3294  
 De Bakker, J.M.T., P2441, 3777  
 De Belder, A., P4643  
 De Belder, M.A., 4992, P5284  
 De Blois, J., 5083  
 De Boeck, B.W., 2051, P2140, P3265  
 De Boeck, B.W.L., P5646  
 De Boer, M.J., P3213, P5291  
 De Boer, R.A., P854, P1413, 2765, 2921, P3413  
 De Bono, J.P., P2989  
 De Bortoli, M., P3233  
 De Bruin, A., P4221  
 De Bruyne, B., 340, P1334, P1527, P1535, 3564, P4040, P4752  
 De Buyzere, M., P3913  
 De Buyzere, M.L., 153  
 De Caralt, T., P3291, P3305  
 De Caralt, T.M., P3292  
 De Carlo, M., P5505  
 De Carvalho Frimm, C., P4498  
 De Castro, S., P4646  
 De Caterina, R., P464, P654, P1478, P2231, P3175, P4050, P4596, P4674, P4937, P5512, P5514  
 De Chiara, A., P801  
 De Chillou, C., 5213  
 De Cillis, E.D., P5493  
 De Ciuceis, C., P549, P559  
 De Cock, C.C., P495, P5632  
 De Courcey, J., P2508, P2520, P4239  
 De Craene, M., P5636  
 De Crescenzo, I., P3896  
 De Cruz, M., 5057  
 De Faire, U., 3770, P4658, P4661  
 De Feijter, P.J., P660  
 De Feo, S., P580, 1903, P4835, P5610  
 De Ferrari, G.M., P3222, P3860  
 De Feyter, P., P1285, P4129  
 De Feyter, P.J., P3009, P4035  
 De Gennaro, L., P4191  
 De Gennaro Colonna, V., P5435  
 De Giacomi, G., P2479  
 De Graaf, F.R., P1351, P1382, P2075, P4622, 4987  
 De Gregorio, C., 1124  
 De Groot, D., 2911, P5404  
 De Groot, J.R., P4767  
 De Groot, N.M.S., P785, P1639  
 De Groote, P., P3351  
 De Haan, S., P1344  
 De Icaza Herrera, M., P5261  
 De Jaegere, P., P4129  
 De Jaegere, P.P.T., 4947  
 De Jong, R.M., P4913  
 De Jonge, P., P3162  
 De Keizer, N.F., P587  
 De Kerchove, L.L.A., 5165  
 De Keulenaer, G.W., 2919, 2922  
 De Kleijn, D., 2017, 2018  
 De Kleijn, D.P., P4488, P4501  
 De Kleijn, D.P.V., 381, 893, 1246, 2911, P3105, P3920, 5227, P5387, P5404  
 De Koning, E., P2242  
 De Koning, E.J.P., P1448  
 De La Fuente Sanchez, A., P4792, P4793  
 De La Hera, J.M., P3129  
 De La Morena, G., 1211, P3266  
 De La Rosa Sanchez, A.J., P4481  
 De La Torre Hernandez, J.M., 2926  
 De Labriolle, A., 2681  
 De Laurentis, M., P5534  
 De Lazzari, M., P5579  
 De Leo, A., P4109  
 De Liefde, I.I., 157, P3159, P5525  
 de Lima, J., 2015  
 De Lima, J.J.G., P2957  
 De Luca, G., P1542  
 De Luca, L., P4146, P4151, P4826, 5222  
 De Lucia, R., P1606, P2358  
 De Lucia, V., P2381  
 De Maat, M., 1799, 4995  
 De Maio, J.I., P5534  
 De Man, F.H., P2136  
 De Marchi, D., P3028, P4879  
 De Marchi, S., P2164  
 De Marchi, S.F., P738, 976, P3192, P4757, P4758  
 De Marco, E., 1124, 5077  
 De Maria, D.M.R., P5677  
 De Maria, G.L., 1155, P1314  
 De Martin, R., P5405  
 De Matos, L.D.N.J., P4698  
 De Meester, A., P2936, 5111, 5153  
 De Meyer, G.R.Y., 905, 1256  
 De Meyer, T., 153, 888, P3913  
 De Mol, P., P1448  
 De Mulder, M., 401, P3006  
 De Nigris, F., P4598  
 De Nisco, A., P2226  
 De Oliveira, A.L.V., P2957  
 De Oliveira, M., 2015  
 De Paepe, A., P5543, P5545  
 De Paoli, A., P1263  
 De Paula, F.J., P2957  
 De Paulis, D., P3875  
 De Peretti, C., P1496  
 De Poli, F., P2090  
 De Raedt, H., P2936, 5111  
 De Riva, M., P2357  
 De Roest, G.J., P5632  
 De Rooij, S.E.J.A., P3311  
 De Roos, A., P700, P1351, P1382, P1453, P1521, P3018, P4141  
 De Rosa, F.G., P4116  
 De Rosa, R., P2191, P4719  
 De Ruvo, E., P4146, P4151, P4826, 5222  
 De Santis, D., 3778  
 De Santo, T., P5627  
 De Sciscio, P., P1329  
 De Servi, S., P1549, P3177, P4723, P5268  
 De Siatl, L., P2207  
 De Silvestri, A., P4228  
 De Simone, A., 5217  
 De Simone, C., 2866  
 De Simone, G., P4100  
 De Sisti, A., P3340  
 De Souza, A.I., P531, P5381, P5382  
 De Teresa, E., P4254, 5128  
 De Teresa Galvan, E., P457  
 De Visser, R., P1285  
 De Vivo, S., P751  
 De Vos, C.B., P623, P630, P3891  
 De Vries, A.A.F., P572, P3099

- De Vries, J.P.P.M., 893, P3104, P3105, P3107, P3920, P5387  
 De Vries, R., P3968  
 De Vries, S.T., P1448  
 De Vries, T., P4045  
 De Waard, M.C., P591  
 De Waha, A., P4711  
 De Windt, L.J., P742  
 De Winter, R.J., P1302, P2938, 3569, P4632  
 De Wit, C., 5139  
 De Zwaan, M., 5006  
 De'faire, U., P1480  
 Deac, M., P3285  
 Deal, L., P3887  
 Dean, J., 1914  
 Dean, R.G., P3382  
 Deanfield, J.E., P4507, P5420  
 Debacker, G., P3114  
 Debacquer, D., P3114  
 Debicka-Dabrowska, D., P872  
 Deboeck, G., P1437  
 Deckers, J.W., P3122  
 Deedwania, P., P3970  
 Deugenio, D., P4733  
 Deev, A., P4693  
 Deev, A.D., P2301, P3996  
 Defaye, P., P1648  
 Deftereos, S., P3330, 5145, P5297  
 Degano, B., P1608  
 Degaute, J.P., 1016, P3147  
 Degenhardt, A.M., 3780  
 Degertekin, M., P639  
 Degiannis, D., P3251, P5674  
 Degrossi, E., P4555  
 Deguchi, Y., P4180  
 Deguise, P., P2131  
 Deharo, J.C., 1904, P3032, P5635  
 Dehina, L.D., P4500  
 Dei Cas, L., P1659, P3001, P3830, P4100, P4691, P5638  
 Deidda, M., P2507, P5589  
 Deisenhofer, I., P4845, 5100  
 Dekany, M., P4233, P4234  
 Deklunder, G., P1568  
 Del Castillo, R., 1114  
 Del Fiandra, M., P2381, P3928  
 Del Giudice, A., P3248  
 Del Giudice, C., 1019  
 Del Lungo, M., P409, P3087  
 Del Pinto, M., P5292  
 Del Ponte, S., P4116  
 Del Prato, S., P1458, P3949  
 Del Rio, A., P2095  
 Del Ry, S., P4932  
 Del Taglia, B., 236  
 Del Valle, R., P4737  
 Del Valle Fernandez, R., P2348, P5258  
 Delacretaz, E., P1639, P3797  
 Deladi, S., P1629  
 Delagado, J., P4926  
 Delahunty, N., P2514  
 Delaney, S., 5115  
 Delarche, N., P2112, 5062, 5063, 5149  
 Delarochelliere, R., 1251, P4742, 5073  
 Delarochelliere, R.H., P3187  
 Delasalle, B., P2347  
 Delcroix, M., P1607  
 Deleanu, D., 2862  
 Delecluse, C., P615  
 Delfuria, F., P3178  
 Delgado, E., P3129  
 Delgado, J., P716, P718, P723, P3822, P4557, P5688  
 Delgado, J.F., 5079  
 Delgado, V., P857, P1451, P1705, 2044, P2156, P2157, P2186, P3300, P3873, P3876, P4102, P4546, 5088, 5094, 5125, P5272, P5633, P5642  
 Delgado Ortega, M., 1951, P2305, P2306, P5320  
 Delgado Palomar, E., P5473  
 Delgado Silva, J., P2463  
 Delhaas, T., P3891  
 Delise, P., 1924, P4146, P4151, P4826  
 Deljanin Ilic, M., P619  
 Dell'era, G., P1542  
 Dell'era, L., P4775  
 Dell'italia, L.J., 5045  
 Dell'omo, G., P4931  
 Dell'oro, R., P4022, P5714  
 Della Bona, R., P3834  
 Della Porta, M., P1711  
 Della Scala, A., P806  
 Della Valentina, P., 5130, P5645  
 Dellabianca, C., P515  
 Dellborg, M., P2979  
 Delle Donne, G., P728  
 Delle Donne, M.G., P1606, P4931  
 Dello Russo, A., 2776, P3260, P4861, P5611  
 Dellsperger, K.D., P3991  
 Delnoy, P.P.H.M., P758, P1635, P2441  
 Delogu, A., P2226  
 Delos, A., 5074  
 Delpon, E., P579  
 Delrue, L., P3345, P4753, 5117, P5676  
 Delrue, M.A., P5546  
 Delsart, D., P698  
 Demerouti, E., P5674  
 Demets, D., 5041  
 Demil, N., P3351  
 Demin, A., P1466, P4108, P5558  
 Demir, E.D., P581  
 Demir, O., P5648  
 Demiraj, A.F., P5259  
 Demirci, D., P3195  
 Demirci, D.E., P3195  
 Demiroglu, I.C.C., P2303, 2860, P3334, 3638, P3909, P3910, P4090, P4635  
 Demirustu, C., P1723  
 Demkow, M., P1567, P4139  
 Demponeras, C., P3189, P3231  
 Demyanets, S., P5376  
 Den Hamer, I.J., P854  
 Den Uil, C.A., P2338, 5204  
 Denardi, C., P2263  
 Dencker, L., P5556  
 Dendrinou, I., P3268  
 Denegri, A., P5669  
 Denes, M., P2415, P4925  
 Dengler, T.J., P2524  
 Denjoy, I., P570  
 Dennis, R., 5245  
 Denollet, J., P3162, P3164, P3165, P3169  
 Dentan, G., P5316  
 Denti, P., P4144, 5156  
 Denton, C.E., P1575  
 Denton-Beaumont, R., P661  
 Depalma, R., P4086, P4088  
 Deplagne, A., P2141  
 Deprest, J., P2183  
 Derchi, G., P4879  
 Derejko, P., P1661, P4163  
 Derosa, G., P1737, P4839  
 Derumeaux, G.A., P1587, P3870, P3875, P4491  
 Dery, J.-P., 1251  
 Dery, J.P., P4742, 5073  
 Derzhko, R., P4920  
 Desai, A., P2542  
 Desai, B., P1309  
 Desai, H., P1670  
 Desal, H., P2347  
 Descalzo, M., P5661  
 Desch, S., P432, P1340, 5148  
 Deschaseaux, F., P3090  
 Deschenes, I., 3778  
 Descotes, J., P1392  
 Descotes, J.D., P4500  
 Descotes, V., P521  
 Descotes Genon, V., P3090, P3856  
 Descotes-Genon, V., P2098, 2823, P2935, P4037, 5209  
 Descoitures, F., P4131, 5155  
 Deserno, V., P2125  
 Desideri, A., P450  
 Desmet, W., 1253  
 Desnos, M., P2395  
 Desrosiers, C., P1397  
 Dessi, M., P2507  
 Dessi-Fulgheri, P., P4620, 5134  
 Dessy, C., P1416, P3959  
 Desvignes, O., P4840  
 Deswarte, G., P4251  
 Detaint, D., 2006, P4131, P4807, 5155, P5543, P5546  
 Detre, E., P4639  
 Deveci, O.S., P1353  
 Devereux, R.B., 159, P863, P866, 1015  
 Devita, M., P4738, P5267  
 Devos, D., P5545  
 Devriendt, K., P4695  
 Dewald, O., P5483  
 Dexter, J., P5684  
 Deye, N., P3813  
 Dhawan, V., P2217  
 Dhillon, O.S., 283, 1959, P3855  
 Dhinoja, M., P2450, 5216  
 Dhoble, A., P3880  
 Di Angelantonio, E., P4190  
 Di Bella, E., P4819  
 Di Bello, V., 1124, P1606, P2174, P4931  
 Di Benedetto, G., P5487  
 Di Biase, L., P770, P1620, P2448, 3652, 5101  
 Di Biase, M., P2150, P4191  
 Di Cori, A., P2358  
 Di Donato, M., P510, P851, 3646  
 Di Filippo, S., P1574  
 Di Fonzo, L.M., P3248  
 Di Ilio, C., P4674  
 Di Lenarda, A., 1213, P3264, P3272, P4244  
 Di Lorenzo, E., P4705  
 Di Luozzo, M., P4087  
 Di Marco, A.P., P1676, P3392  
 Di Marino, S., P4890  
 Di Mario, C., P3174, P3178, 5197  
 Di Meglio, F., P2972, P3061, P3065, P3076  
 Di Monaco, A., P597, P2226, P4001, P4578  
 Di Nucci, G., P407  
 Di Palma, V., P751  
 Di Pasquale, G., P3838  
 Di Pasquale, P., 5046  
 Di Pasquo, I., P1501  
 Di Puccio, F., P3052  
 Di Rienzo, M., P1427, P3042  
 Di Rocco, G., 1155  
 Di Roma, A., P470  
 Di Salvo, G., P2174, P2370  
 Di Salvo, M.E., P685, P1510, P2066, P4033, P4722  
 Di Sciascio, G., P1334, P3175, P3232, P4534, P4703  
 Di Serafino, L., P1686  
 Di Somma, S., 2771  
 Di Stefano, R., 1245, P1273, P1454, P1458, P2198, P2199, P2201, P3949, P5249, P5512, P5514  
 Di Tano, G., P4223  
 Di Tommaso, L., P5517  
 Di Valentino, M., P1372  
 Di Vito, L., 1155, P1314  
 Di-Biase, L., P4188  
 Diago, J.L., P4773  
 Diakakis, G.F., P2252, P2259  
 Diakos, N., P861  
 Diarte, J.A., 2926  
 Dias, E.T., P4025  
 Dias, P., P2317, P5595  
 Dias, R.G., P4699  
 Diaz, B., P606  
 Diaz, E., P3299  
 Diaz, P., P4557  
 Diaz Escofet, M., P5622  
 Dibbets-Schneider, P., 2819  
 Dibella, E.V.R., P1638  
 Dibra, A., P644, 2929, P4705, P4711  
 Dichtl, W., P1350  
 Dick, A.J., P3084  
 Dick, M., P776  
 Dickele, M.C., P2090  
 Dickinson, G., 2780  
 Dickinson, K., 249, P3020  
 Dickmeiss, E., 2816  
 Diederichsen, A., P3040  
 Diego, M., P744  
 Diegoli, M., 5039  
 Dieks, K., P4640

- Dielhoff, B., P3872  
 Diemberger, I., P2079, P5618  
 Diena, M., 335  
 Dienesch, C., 5055  
 Dieplinger, B., 158  
 Dierickx, K., P4753, P5676  
 Dierkes, J., P4186  
 Diesch, J., P617, P3988  
 Dietel, B., P467, P5498  
 Dietrich, C., P3289, P3293  
 Dietrich, T., P4584  
 Dietz, H., P5545  
 Dietz, R., P526, 2020, P2137, 2818, P3075, P3078, P3240, P5624  
 Dieuboue, J., P3147  
 Diez, C., P3167, P4231  
 Diez, J., P4254  
 Diez, M., 1912, P5661  
 Dijk, F., P5468, P5469  
 Dijkstra, J., P3018, 4956, 4983  
 Dijkstra, M.H., P5389  
 Dilaveris, P., P4149, P4919  
 Dilaveris, P.E., P781  
 Diliberto, R., P4560  
 Dill, T., 1255, 1257, P1311, P1364, P3019, P3214, P5264, P5312  
 Dilleen, M., P1579, P1589  
 Diller, G.-P., P5327  
 Diller, G.P., P4766, P4768  
 Dillinger, J.G., P3813  
 Dima, I., P466, 1020, P1529, P2185, P2531, P3171, P3405, P3919, P3973, P4265, P4702, P4935, P4936  
 Dima, K., P4900  
 Dimario, C., P1508  
 Dimas, C., P2282  
 Dimitri, H., 1920, P2426, P2443, P3341, P5560  
 Dimitriadis, G., P3106  
 Dimitriadis, K., 386, P551, P607, P625, P869, P1483, P2212, P2232, P2284, P2286, P2539, P3146, P3400, P3408, P3410, P3923, P3931, P4253, P4258, P4267, P4270, P4682, P4940, P4946, P5419, P5708  
 Dimitriou, A., P1315, P1319  
 Dimitriou, A.-G., P5593  
 Dimitriou, A.G., P825  
 Dimitrova, T., P4475  
 Dimopoulos, A., P2149  
 Dimopoulos, K., P2386, P4765, P4766, P4768, P4785, P4803, 5180  
 Dimopoulos, M.A., 5044  
 Ding, D., P664  
 Ding, Z.P., P833, P2177  
 Dinh, W., P4902  
 Dinh Cat, A.N., P3288  
 Dini, F.L., P844, 1124, P2168  
 Dinkelborg, L., P4584  
 Dinucci, D., 1245  
 Diogo, A., P736  
 Dion, R.A., 3648, P4903  
 Dirschinger, J., 2931  
 Disabella, E., P5484  
 Disertori, M., P4727  
 Disomma, S., 1098  
 Distelmaier, K., P2101, P5282  
 Dith, I., P4166  
 Divakaramenon, S., 1914, P2447, P4847  
 Dixon, G., P4643  
 Djaballah, W., P4083  
 Djaberi, R., P1451, P1453, P2242, P4654  
 Djiane, P., P2121  
 Djokovic, A., P4176  
 Djordjevic-Dikic, A., P3117, 3565, P5331  
 Djouhri, S., P5675  
 Dk, K.I.M., P4709  
 Dlugopolski, R., 5183  
 Dluzniowska, M., P4917  
 Dluzniowski, M., P4917  
 Dnazi, G.B., P2115  
 Do, V., P5724  
 Dobordzhinidze, L.M., P3996  
 Dobarobantu, M., P3138  
 Dobreanu, D., P1434  
 Dobrovolsky, A.B., P2439  
 Dobrzycki, S., P663, P5300  
 Dodic, S., P2312  
 Dodos, F., P1594  
 Doehner, W., P1441, P1679, 2649, 5058, P5655  
 Doehring, L.C., 380  
 Doenst, T., P842, P1690  
 Doering, A., P3976, P4656  
 Doerler, J., P4626  
 Doerner, A., P1404  
 Doerr, M., 2674, P4663  
 Doerr, R., P2997  
 Doerries, C., 387, 2913  
 Doesch, A.O., P2524  
 Doesch, C., 3641  
 Doevendans, P.A., P1428, 1956, 2017, 2051, P2136, P2140, P3265, P4488, P4501, P5646  
 Doevendans, P.A.F.M., P5656  
 Doevendans, P.A.M., P2204  
 Dogan, A., P1536, P2533, P3362  
 Dogan, E., P4192  
 Doganov, A.L., P4717  
 Doggen, K., 2919, 2922  
 Dogramatzi, F., 2640  
 Dohi, K., P3275, P3352, P4876  
 Dohi, Y., P476, P3983, P4660, P4667, P4668, P4678  
 Dohmen, G., P4134, 5064  
 Doi, A.M., P583  
 Doi, M., P4934, 5005  
 Doi, N., P4078  
 Doi, T., P1421  
 Doi, Y., 3640  
 Doigny, D., 5244  
 Dokainish, H., 2045, P2146  
 Dolecek, R., P5640  
 Doleschal, B., P552  
 Doltra, A., P1275, P2983  
 Domanovic, D., P5692  
 Domanski, M., P3008  
 Domei, T., 2642, P4568  
 Domenichini, G., P2079, P5618  
 Domingo, E., P504, P731  
 Dominguez, H., P1440, P3962  
 Dominguez, J.N., P4481  
 Dominguez Franco, A., P457  
 Dominguez Rodriguez, A., P4912  
 Dominiak, M., P3863  
 Dominiak, M.T., P2506  
 Donal, E., P2141, P4093, P4492, 5062, 5063, P5616  
 Donataccio, M.P., P1300, P5477  
 Donato, F., P1659, P5638  
 Donnelly, P.M., P3013  
 Dong, L., 2927  
 Dong, L.L., P520, P2363  
 Dong, M., P664, P2984, P3393  
 Dong, Y., P1631  
 Dongzhu, X., P4862  
 Donners, M., P5403  
 Donovan, G., P2334, P3048  
 Donovan, G.C., P2336  
 Donovan, J., P831  
 Donovan, J.L., P2084  
 Donzel-Javouhey, A., P618  
 Donzelli, S., P5406  
 Dooijes, D., 1210, P3243, P3247  
 Dopheide, J.F., P4594  
 Dopico-Pita, J., P1449  
 Dor, V., P852  
 Dore, R., P5484  
 Dorent, R., P511  
 Dores, H., P3888, P4853, 5243  
 Dorian, P., P4852  
 Dorigatti, F., 160  
 Dorigo, E., P4130, P4144, 5156  
 Dormandy, J.A., P1441, 2649  
 Dorniak, W., P2116  
 Dorobantu, M., P2092, P5644  
 Doronzo, B., P2442  
 Dorr, M., 2675  
 Dorsaz, P.A., P3895, P5500  
 Dos Remedios, C., P5381  
 Dos Santos, J.E., P2256  
 Dos Santos, M.R., P4699  
 Dosenko, V.E., P2135  
 Dostal, O., P522  
 Douard, H., P601  
 Doucet, S., P2131, P4685  
 Doue, T., 394  
 Doughty, R.N., P541, P2167, P5673  
 Doulaptis, C., P4162  
 Douma, R., 5186  
 Doumas, M., 131, 165  
 Douna, F., P4190  
 Dourado, R., P3038  
 Douskou, M., P5576  
 Doutrelan, L., 2869  
 Douwes, J.M., P1573  
 Douzenis, A., P5668  
 Doval, H.C., P4555  
 Dovellini, E., P665  
 Doveri, M., P513  
 Dowsey, A.W., P2388  
 Doyle, D., 5237  
 Doyon, O., 5007  
 Drager, L.F., P4025  
 Draghici, C., P2165  
 Drago, F., 5098  
 Dragu, R., P2996  
 Dragulescu, D., 2052  
 Dragulescu, S.I., P414, 2052  
 Dragun, D., P1524  
 Drakopoulos, I., P3189, P3231  
 Drakopoulou, M., 395, P452, P1462, P1522, 3559, P4064, 4984  
 Drapisz, S., 3642  
 Drca, N., P1637  
 Drechsler, M., P1385  
 Dreger, H., P789, P3955, 5140  
 Drenthen, W., P4789  
 Dressen, M., P4637  
 Drew, B.G., 5135  
 Dreads, T., 1004, 1005, P4133  
 Drexel, H., P1464, P2262, P2270, P2279, P2975, P4666  
 Drexel, V., P2213, P4541  
 Drexler, H., 1244, P3372, 5225  
 Dreyse, S., P4133, P4200  
 Dridi, Z., P1326, P4042  
 Drighil, A., P2376  
 Dritsas, A., P2947  
 Driva, M., P3330, P5297  
 Drivakos, A., P4023  
 Drodz, J., P2506  
 Drogoul, L., P705, 895  
 Drolias, A., P1682  
 Drouet, E., P631, P5301  
 Drouin, A., P546, P2193  
 Drodz, J., P422, P1293, P1297, P2410  
 Drye, E., P813  
 Drygas, W., P3161  
 Drzewiecka, A., P3918  
 Dschietzig, T., P732, P1419  
 Dua, J.S., P510, P4814  
 Dubiel, J., P683  
 Dubiel, J.S., P2958  
 Dubini, A., P4022  
 Duboc, D., P3276  
 Dubois, P., 5111, 5153  
 Dubois, P.H., P2936  
 Dubois-Rande, J.L., P5630  
 Dubois-Rande, J.L., P2134, P2474, P3369, P3887, P4158, P4251  
 Duboscq-Bidot, L., 2918  
 Dubourg, O., P2153, P2155, 5074  
 Dubrey, S.W., 5009  
 Dubroca, C., 5226  
 Dubuc, M., P754, P805  
 Ducardonnet, A., P3351  
 Ducas, R.A., P2994  
 Ducasse, J.L., P1291  
 Ducharme, A., 5007  
 Duchene, C., P3043  
 Ducimetiere, P., 133, P624, P2128, P5443  
 Duckett, S., P4518  
 Duclos, F., P3852  
 Ducreux, D., P743  
 Ducrocq, G., P2093, P4131, 5155



- Dudek, D., P683, P872, P2958, P3179, 4955  
Dudina, A., 129, P3979, P5452, P5458  
Dudova, D., P1474  
Duenas, R., P3133  
Duengen, H.-D., P4897, P4914  
Duengen, H.D., P2428  
Duerden, R., P604  
Dufaitre, G., P4190  
Duff, H., P2471, P2473  
Duffy, S., 2647  
Duffy, S.J., 4951, 5135, P5481  
Dugoni, A., 1010, P5355  
Dugoni, A.D., 1008  
Duhoux, F.D., P4110  
Duicu, O., P1395  
Dujardin, J.J., P631  
Dujic, Z., P2223  
Dul, P., P707, P747  
Dulac, Y., P506  
Duman, D., P2173, P3357, P5698  
Dumas, F., 255, P3809, P3810  
Dumesnil, J.G., P3792, P4092, P4104  
Dumitrascu, A., P2165  
Dumitrascu, C., P2165  
Dumitrescu, D., P1588, P1594  
Dumitrescu, S.I., P4652  
Dumitriu, I., P825  
Dumitriu, I.E., P5377  
Dummler, S., P4637  
Dumont, E., 5237  
Dumonteil, N., P3828, P4740  
Dunbar, D., 888  
Dunbar, S.B., 123  
Duncan, E., P813  
Duncan, M., P4765  
Duncker, D., 1252  
Duncker, D.J., P3205, P3210, P3211, P3968  
Duncker, D.J.G.M., P591  
Dunda, S., P3245  
Dundon, B., P1374  
Dundon, B.K., P1349  
Dunkelgrun, M., P1445, P2966  
Dunne, M., P820  
Dunselman, P., P4205, P5679, P5685, P5701  
Duocastella, L., P3207  
Duplain, H., P738, 976  
Duplyakov, D., P1296, P4511  
Dupouy, P., P2134, P2967, P4729, P5301  
Dupuis-Girod, S., P4892  
Duque, G.S., P4169  
Duque, M.D., P4181  
Durak, A., P3319  
Duran, A.D., 5068  
Duran, G.D., 5068  
Duran, M., P1536  
Duran, N., 2770  
Duran, N.E., P2411  
Duran, X., 1152  
Durand, A., P1648  
Durante, A., P4675  
Duranti, M., 5186  
Durighel, G., 5170  
Durmaz, B.D., P581  
Durmaz, T., P5319  
Duronto, E., P3021  
Durrington, P.N., P2244  
Durst, R., P5369  
Duru, F., P2162, P5604  
Dussault, C., P3887  
Dutheil, J., P521, P2098, 2823, P2935, P3856, P4037, 5209  
Dutka, D.P., P4506  
Duttaroy, S., P5411  
Duval, X., P2413  
Duvdevani, A., P3941  
Duvina, A., P4914  
Duvivier, C., P4257  
Duvoisin, N., P3824  
Dvir, D., P4061  
Dvorak, J., P791, P2402  
Dworakowski, R., P4135  
Dwyer, N., P1590  
Dymarkowski, S., 1253, P1342  
Dzenkeviciute, V., P3999  
Dziura, J., P4574  
Dzyak, G., P2988  
Earley, M., 5216  
Earley, M.J., P2450  
Ebbing, M., P1274, P1295  
Eber, B., P1722  
Eberle, B., P3797, P5256  
Eberle, H.-C., P1337  
Eberle, S., 2929  
Eberli, F., P4715, P4736, 4993, P5280  
Ebihara, A., P3867  
Ebisu, K., P4574  
Ebner, B., P1704  
Ebraheem, H., P2235  
Eccleston, D., P4745  
Ecollan, P., P5276  
Economou, D., P2513  
Ector, H., P4810  
Edelman, E.R., 899, P2323, P4069, P4602, P4619, P4760  
Edelmann, F., P2428, P4897, P4905, P4911, P4914  
Eder, S., P4809  
Ederhy, S., P4190, P4257  
Edmondson, K., P5296  
Edstrom-Pluss, C., P589  
Edvardsen, T., 292, 1116, P2175, P3306, P3865, P4634, P4923, P5313, P5366, P5631  
Edvardsson, N., P5428, P5429  
Edvardsson, V., P3338  
Edwards, C., P600, P3124  
Edwards, C.P., P2508, P2520, P4239  
Eefting, F.D., P2136  
Eek, C., P3865  
Eenkhooen, E.F.H.A., 5012  
Efanova, O., P3097  
Efstathiou, S., P1487, P2282  
Efthimiadis, A., 2640  
Efthimiadis, I., 2640  
Egdell, R.M., P1494  
Egeblad, H., 1921  
Egerer, K., P4888  
Egerer, R., P3287  
Eggebrecht, H., P4750  
Egger, M., P2189  
Eggington, S., P3965  
Egglezopoulos, K., P2103  
Egido, J., P3263  
Egred, M., P4586  
Egrise, D., P3956  
Egstrup, K., P2171, P5570  
Egstrup, M., P5663  
Ehara, M., P688, P1366, P1505, 3562, P4554  
Ehlenitzky, M., 1901  
Ehlermann, P., P636, P3234, P3256  
Ehlers, E.M., 380  
Ehlert, N., P4778  
Ehliken, B., 4978  
Ehrhardt, C., P3287  
Eicher, J.-C., P1716  
Eicher, J.C., P1373  
Eichinger, M., P670, 3771  
Eick, C., P555, P574  
Eide, G.E., 128  
Eigenmann, C., P2164  
Eijgelsheim, M., 5117  
Eikelboom, B.C., P5440  
Einav, S., P1507, P4061, P4068  
Eindhoven, J., P3857, P4030, 4949  
Eiras, S., P1400, 3661  
Eiris Cambre, M.J., P1449  
Eisenreich, A., P2221  
Eitel, C., P764, P4187, P4871  
Eitel, I., P432, P1339, P1340, P1343, 2822, P2956, 5148, P5295  
Eitenmueller, I., P2205  
Ekeberg, I.S., P5707  
Ekonomopoulos, G., P4612, 5136, P5421  
Ekroos, K., P5414  
Ekroth, R., 5235  
El Baghdady, H., P851  
El Farouk, O., P2387, P4558  
El Fiky, A., P2387, P4558  
El Ghannudi, S., P1307, P1312  
El Hadad, S., P3852  
El Kadri, M., P576  
El Khebir, C., P511  
El Khoury, G., 5165  
El Mahmoud, R., P2155  
El Massri, N., P446  
El Sayed, M., P2387, P4558  
El Shahed, G., P2387, P4558  
El-Banayosy, A., P1691  
El-Bizri, N., P404  
El-Omar, M., P1554  
El-Sherif, A., P2154  
Elalamy, I., 1954  
Elbaz, M., P1291  
Elder, D.H.J., P4518  
Eldstrom, J., 3780  
Elefterakis, N.G.E., P2373, P2378  
Eleftherakis, N.E., P2350  
Elezi, S., P844  
Elezovic, I., P4199  
Elhadad, S., P2134  
Elhadidy, E.S., P4769  
Elhenicky, M., P828, P4216, P4224  
Eli Lev, E.L., P1550  
Elices, J., P5603  
Elion-Mboussa, A., 5173  
Elisaf, M., P4013  
Elizaga, J., 2926  
Elkheyr, M., P1283, P1284  
Elkoustef, R., P674  
Ellinghaus, P., P4902  
Ellingsen, Ø., P3391  
Elliot, P., 1151  
Elliott, H.L., P4509  
Elliott, P., P1262  
Elliott, P.J., P3944  
Elliott, P.M., P1561  
Ellis, C.J., P541  
Ellis, G.R., P790  
Ellis, K.L., P541  
Ellis, S., 4992  
Ellis, S.G., 5157  
Ellison, G.M., 904, 2916, P3060  
Elmiers, L., P1697  
Elmas, E., P4145, P4636, P4870  
Elmasry, O.A., P1601, P4769  
Elmer, G., 5187  
Einoamany, M.F., P1609, P1710, P2235, P5342  
Elosua, R., P632, P2298, P3133  
Elsaesser, A., P843, P1406, P1545, P2206, P3055, P3371  
Elsharkawy, E., P5255  
Elsheekh, N., P2235  
Elsik, M., P5639  
Eltchaninoff, H., P5260, P5261, P5262  
Elvan, A., P758, P1635, P2441  
Emans, M.E., P5656  
Embersson, J., 2782, 3544  
Embersson, J.R., 980  
Embrechts, J.L.A., 2911  
Emdin, M., P822, P827, P1680, 2767, P3360, P3414, P4549, P4553, P5368  
Emmel, M., P2374, P3320  
Emmerich, J., P479  
Empaña, J.P., 133, 255, P624, P3809, P3810, P5424, P5443  
Emparanza, J., 5203  
Empen, K., 2674, 2675  
Emperanza, J., P3843  
Emslander, I., P2213  
Enache, I., P3392  
Enache, R., P602, P2183, P2184  
Ender, G., P3409  
Endres-Becker, J., 2016  
Endresen, K., P2281  
Enea, I., P735  
Enescu, O., 335

- Enger, S., P3333, P4864  
 Englberger, L., P2414  
 Englert, A., 1208, P1581  
 Englund, A., 2784  
 Engstroem, T., 5206  
 Engstrom, A.E., P2938  
 Engvall, J., P2180  
 Enia, F., P4116  
 Enin, E., P4611  
 Enjuanes-Grau, C., P4912  
 Ennekens, G., 4960  
 Ennezat, P.V., P2204, P4104  
 Ennis, I.L., P4943  
 Enriquez-Sarano, M., 337  
 Enriquez-Sarano, M.E.S., P2392  
 Enseleit, F., P5604  
 Enthofer, K., P1390, P1401, P1402  
 Entok, E., P1723  
 Epailly, E., P2328  
 Epema, A.H., P854  
 Epistolato, M.C., P5567  
 Epstein, A., P1656, 1909, P3811  
 Epstein, S.E., P2190  
 Erasmus, M.E., P854  
 Erbel, R., 1128, P1585, P4750, 5157  
 Erbs, S., 288, P1677, P2480, P2944, P2950,  
 P2951, 3528, P4690, P4755, 4959, 4963, 4966  
 Ercan, E., P418, P1369, P4701  
 Erdim, R., P4635  
 Erdine, S., 1017  
 Erdmann, E., P1441, P1447, P2477, 2649, P5448  
 Erdmann, J., 380, P4689  
 Erdogan, A., P455, P463, 889, P1649, P3953  
 Eremeeva, M.V., P415  
 Eren, A., P2382  
 Ergelen, M., P3182, P3195  
 Ergun, M., P4701  
 Ericson, M., P4173  
 Eriksen, E., P4106  
 Erikssen, G., P4679  
 Erikssen, J.E., P4679  
 Eriksson, J., P5474  
 Eriksson, M., P2244  
 Eriksson, U., P2203, P5389  
 Eriksson, U.G., P4851  
 Eritsland, J., P1468  
 Erkal, E., P4193  
 Erkapic, D., 1257, P1364, P1624  
 Erl, A., P472, P539  
 Ermacora, D., P750, P3363  
 Ernande, L., P1587  
 Erne, P., 1249, P2202, 2774, P3094, P3824, P3945,  
 P4615  
 Ernst, S., P767, P5375  
 Eroglu, S., P2237, P2430  
 Erol, C., P1539, P2225  
 Erqou, S., 1823  
 Erschow, S., P3372, 5225  
 Ertas, G., P3209  
 Ertl, G., 385, P417, P2159, P2214, P2482, P3966,  
 P4245, P4524, 5055, 5082, 5231, P5670  
 Ertl, G.E., 2861, P3897, P4105  
 Ertugrul, O., P1353  
 Erturk, E., P2411  
 Eruchie, D., 249  
 Eryol, N.K., P2533  
 Eryuksel, E., P5365  
 Esalmi, B., P490  
 Escandon, R., P2519  
 Escaned, J., P1543, P4737  
 Escaned Barbosa, J., P4734  
 Eschen, O., P5702  
 Escher, F., P1699  
 Eschwege, E., P1442  
 Escobar, A., 1955, P2118  
 Escolar, G., P435  
 Escoubet, B., P3249, P3288  
 Escribano, P., P716, P718, P723, P1572, P4557  
 Escudero, E.M., P4943  
 Escudier, J.E.V., P1666  
 Escudier, J.M., P773  
 Esdorn, H., P4545  
 Esen, A.M., P3326  
 Esen, O.B., P3326  
 Esfahani, A., 3529  
 Esis, C., P598, P2541, P5439  
 Esmaeilzadeh, M., P2417  
 Espana, F., 1953  
 Espejo, S., P2369  
 Espejo Perez, S., P5320  
 Espinosa, L., P3032  
 Espinosa Castro, M.A., 5011  
 Espinoza, A., 292  
 Esplugas, E., P4731  
 Esposito, A.C., P4598  
 Esposito, G., P1408, P1686, P4084, P4719  
 Esposito, G.P.E., 1011  
 Esser, S., P1585  
 Essers, J., P5544  
 Esteve, J.B., 5200  
 Estevez Loureiro, R., P840, P3186  
 Estevez-Loureiro, R., P2980, P5285  
 Estner, H.L., P4845  
 Estornell, J., P4540, 5080  
 Estrada Gomez, S., P744  
 Etheridge, S.P., P776  
 Etienne, Y., P4241, P5599, P5625  
 Eto, M., P2248, P3950  
 Etori, F., P5268  
 Eugen-Olsen, J., P5455  
 Euler, G., P1404, P3394  
 Eutychiou, C., P3242  
 Evangelidis, G., P4200  
 Evangelista, A., 1007, 1010, P1707, P2161, P4646,  
 5067, P5353, P5355  
 Evangelista, A.E., 1008  
 Evangelista, L., 127  
 Evangelista Masip, A., P4089  
 Everett, B.M., P5445  
 Evers, K.S., P1338  
 Evers, R., P1338  
 Evrard, P., P2936, 5111  
 Ewe, S.H., P833, P5427  
 Ewen, E., P4856  
 Ewert, P., P4809  
 Exner, D., P2471, P2473  
 Exposito, V., P1422  
 Exposito Garcia, V., P841  
 Exton, S.A., 5127, P5617  
 Extramiana, F., P3336  
 Eyigor, S.E., P581  
 Eyjolfsson, K., P3135, P3144  
 Eymard, B., P3276  
 Eyskens, B., P4810  
 F, P., P5698  
 Fabbri, P., P4516, P4616  
 Fabbriocchi, F., 5071, P5511  
 Fabbri, A., 3646  
 Fabbri, G.M.T., P4204  
 Faber, L., P1268, P3284, P4545, P4909, P5693  
 Fabiano, G., P794  
 Fabio Fantini, F.F., 3645  
 Fabri, M., P2312  
 Fabritz, L., 3779  
 Fabrizio, F., P827  
 Facchetti, R., 168  
 Facchini, A., P2504  
 Facila, L., 5004  
 Facta, A.D., P2076  
 Faden, G., P4691  
 Fadini, G.P., P3971  
 Faerber, G., P1690  
 Faergeman, O., P5531  
 Faes, D., P3228  
 Fagagnini, A., P4826  
 Faganello, G., P2365  
 Fagard, R., 4967  
 Faggiano, P., P1266, P4100  
 Faggini, E., P5561  
 Fahrleitner-Pammer, A., P811  
 Fahrner, R., 5093  
 Fahy, M., 1957  
 Faini, A., P1435, P3807, P5694  
 Faita, F., P1712, P2207  
 Faivre, L., P3058, P5546  
 Fajadet, J., 2923, 4991  
 Fakiolas, C., P4031, P4218  
 Falahati, A., P5247  
 Falcao-Pires, I., P741, P3383, P4895  
 Falcone, C., 5104  
 Falconi, M., 336  
 Faletra, F., P1281, P1707, P2161, 5067  
 Faletra, F.F., P4560, P4646  
 Falk, L.C., 242  
 Falk, V., P2068  
 Fall, S., P848  
 Fallani, F., P2079  
 Faludi, R., P483, P485, P2180  
 Falz, R., P4269  
 Fan, C., P1511  
 Fan, X., P2258  
 Fang, Q., P5305  
 Fang, T., P494  
 Fang, Y., P2510  
 Fannelop, R., 293  
 Fantinato, S., P537  
 Farah, M.E., P4610  
 Farahmand, B., 149, P5428, P5429, P5497  
 Farhan, A., P2154  
 Farhan, S., P675, P4039  
 Farhat, F., P3119  
 Farhat, N., P2193  
 Faria, C., P3998  
 Faria, R., 1107, P2129  
 Faria Neto, J.R., P3103  
 Faria-Neto, J.R., P2256  
 Farid, M.M., P4769  
 Farinetti, A., 2643  
 Farkas, K., P3115  
 Farkouh, M., P2318, 5191  
 Farkouh, M.E., P3225  
 Farmaki, K., P3268  
 Farmakis, D., 126, P3157, P4926, 5144, P5666  
 Farouque, O., 2647  
 Farr, M., P3241  
 Farrell, K., P3062  
 Farrero, M., P438  
 Farsky, S., P5709  
 Farstad, M., P3811, P4523, P4527  
 Farto E Abreu, P., P1465  
 Farzati, B., P3946  
 Faselis, C., 131, 165  
 Fasnacht, M., P4779, P5555  
 Fassoulakis, C., P638, P1529, P2532  
 Fatemi, M., P4241, P4840, P5599, P5625  
 Fath-Ordoubadi, F., P2115  
 Fatih, A., P5698  
 Fatini, C., P5536  
 Fattiroli, F., P580, P4835  
 Fauchier, L., 2918  
 Fava, F., P515  
 Favale, S., P584, 3778, P4215, P4247, P4526  
 Favalli, V., P486, P5484, P5671  
 Favalaro, L., 1912, P5661  
 Favalaro, R.R., P5578  
 Favi, E., P2953  
 Favilli, B., P3028, P4543, P4879  
 Favilli, R., P3893  
 Favretto, G., P735  
 Favretto, P., 5188  
 Fay, R., P4536  
 Fayyad, R., P2245, 3544  
 Fazendas, P., P2403  
 Fazio, G., P782, 5046  
 Fazio, S., P2496  
 Fearon, W.F., P4040  
 Febo, O., P4232  
 Fechner, M., P4599  
 Fedacko, J., P1474, P2255  
 Fedackova, P., P1474  
 Fedak, D., P3415  
 Fedatovskikh, G., P4611  
 Fedele, F., P470, P3862  
 Fedele, M., P4516, P4616  
 Federici, C., P3928  
 Federico, G., P1454  
 Federico, P., P4540  
 Fedida, D., 3780  
 Fedorco, M., P4227  
 Fedorowski, A., 167  
 Fehr, M., P4640

- Feijao, A., P746  
 Feijoo-Bandin, S., P1399  
 Feinberg, M.S., P1475, P2227  
 Feldman, C.L., 899, P4069, P4602, P4619, P4760  
 Feldmann, M., 379  
 Felekos, I., P5351  
 Felekos, J., P5341, P5345  
 Felice, F., P3949  
 Feliciano, J., P614  
 Feliciello, A., P1408  
 Felix, S.B., 2674, 2675, P4248, P4663, P4888  
 Felker, G.M., 1101, P2486, P2489, 2763, P4252, P5658  
 Fellner, B.F., P709  
 Feltrin, G., P2948  
 Fendler, W., P3930  
 Feneley, M., P3022  
 Fenelon, L.M.A., P847  
 Feng, H., P1570  
 Fengler, A., P5653  
 Fengersrud, E., 2784  
 Fenollar, F., P3794  
 Feola, M., P4223  
 Ferda, J., P1368  
 Fereig, H., P3906  
 Ferenc, M., P4053, 5194  
 Ferket, B.S., P3123  
 Ferlin, E., P4945  
 Fernandes, C.C.F., 1150  
 Fernandes, C.C.F., P2999  
 Fernandes, J., P564, P578, 1240, 5236  
 Fernandes, L.C.M., P1709, P4898  
 Fernandez, A., 1912, P2468, 3661  
 Fernandez, C., P4114, P4115, P4117, P4120  
 Fernandez, E., P4254  
 Fernandez, F., P516, 2916, P3060  
 Fernandez, L., P1378  
 Fernandez, M.T., P4036  
 Fernandez, X., 1211, P3253, P5603  
 Fernandez Armenta, J., 5161  
 Fernandez Aviles, F., 1114  
 Fernandez Berges, D.J., P3848  
 Fernandez Cavazos, R., P566  
 Fernandez De La Concha, J., 1910  
 Fernandez Lozano, I., 1910  
 Fernandez Lozano, I.F.L., P1666  
 Fernandez Palomeque, C., P4792, P4793  
 Fernandez Vivancos, C., 5161  
 Fernandez-Aviles, F., P3342, 3660, P3842, P4229, 5011, 5102  
 Fernandez-Diaz, J.A., P773, 3656  
 Fernandez-Fernandez, C., P4235  
 Fernandez-Friera, L., P841  
 Fernandez-Golfín, C., P491, P492, P2304, P2397, P2401, P3039, P4183, P4563, P5329  
 Fernández-Hidalgo, N., P3795, P4111  
 Fernandez-Lozano, I., P773, P1662  
 Fernandez-Ortiz, A., P1316, 4958  
 Fernandez-Pereira, C., P4555  
 Feron, O., P3959, 5226  
 Ferraironi, A.F., P5677  
 Ferrannini, E., P1441, 2649  
 Ferrante, E.A., P5352  
 Ferrante, G., P461, P697, P1271, P3174, P3178  
 Ferrantini, C., 1238  
 Ferrao De Oliveira, J., 1002  
 Ferrara, E., P515  
 Ferrara, L., 2866  
 Ferrara, N., P819, P5681  
 Ferrara, V., P4674  
 Ferrarello, S., P4144  
 Ferrari, C., P3184  
 Ferrari, E., P705, 895, P2978  
 Ferrari, I., P1737  
 Ferrari, M., P784, P2342, P2345, 4979, 4982  
 Ferrari, M.D., P4802  
 Ferrari, R., 1799, 4995, 5052, 5130, P5645  
 Ferrario, M., 2050  
 Ferraro, M., P2087, P3176, P3201  
 Ferraro, S., 252, 256, P3814, P3815  
 Ferraz, A.S., P583  
 Ferreira, A., P611, P774, P5463  
 Ferreira, A.R., P1465  
 Ferreira, C., P774, 1825, P5496  
 Ferreira, F., P2491, P4530  
 Ferreira, I., 1007, 1010  
 Ferreira, J., P1728, 1960, P2296, P5281, P5450, P5463  
 Ferreira, J.C.B., P3378  
 Ferreira, L., P614  
 Ferreira, M.L., P421, P2939  
 Ferreira, N., P4036, P4915  
 Ferreira, R., P3358, P4853  
 Ferreira, R.C., P421, P614, P2939, P2941, P5600  
 Ferreira, S.M.A., P5699  
 Ferreira Santos, L., 1107  
 Ferreira-Martins, J., P3358  
 Ferreira-Sae, M.C.S., P2530, P3403, P4942  
 Ferreiro, J.L., P1309  
 Ferreiros, J., P4563  
 Ferrer, M.C., P1543  
 Ferrero Gregori, A., P4207  
 Ferri, C., P728  
 Ferri, L.A.F., P534, P538  
 Ferrieres, J., P436, P595, P631, 884, P1463, P2128, 2650, 3540, P4657, 5149, P5301, P5443  
 Ferrini, D., P5267  
 Fersi, I., P5625  
 Festa, P., P4788, 5160  
 Fetics, B.J., P5629  
 Fetsch, T., P646  
 Fettich, J., P5692  
 Feuchtner, G.M., P1350  
 Feuchtner, K., P1350  
 Feyter, P.J., 1252  
 Fianchini, A., 5134  
 Fibbe, W.E., 2819  
 Fichtlscherer, S., P5464  
 Fichtner, S., P4845, 5100  
 Fici, F., P4264  
 Ficker, E., 3778  
 Ficorella, C., 1095  
 Fidler, F., P768  
 Fidorra, K., P1493  
 Fiedler, J., P2214  
 Fiedler, S., P1370  
 Figiel, L., P3863, P5314  
 Figueiredo, A.B., P3278  
 Figueiredo-Neto, A.M., P3939  
 Figulla, H.-R., P2345  
 Figulla, H.R., P1683, P2145, P2449, P2522, P3287, P3907, P4923, 4979, 4982  
 Fijalkowska, A., 5183  
 Fikenzer, K., P4269  
 Fikenzer, S., P4269  
 Filali, T., P4042  
 Filgueira, D., P3299  
 Filgueiras, D., P4786, P4790  
 Filho, M.M.P., P847  
 Filipecki, A., P1661, P2458  
 Filipescu, D., 5042, 5242  
 Filipiak, K., 392, P3080  
 Filipiak, K.J., P1328, P1562  
 Filippatos, G., 126, 1098, P2486, 2763, 2771, P3157, P4252, P5658, P5666, P5668  
 Filippatos, G.S., 1101, P2489, P4203  
 Filippelli, A., P819  
 Filis, K., P5535  
 Filmer, A., P2266  
 Findlay, I.N., P3255  
 Finet, G., P4056, P4892  
 Fink, M., P479  
 Finlay, M., 5216  
 Finn, C.J., P2177  
 Finsen, A.V., P824, P1410, P1674  
 Finta, L., P4574  
 Finzi, A., P1660  
 Fiocca, L., P4072, 5211  
 Fiocchi, F., P3994  
 Fiocchi, R., 1001  
 Fiol, M., 2778, P4207  
 Fiorani, B., P407  
 Fiorentini, C., P2479, 5071, P5511  
 Fioretti, P.M., P750, P3363  
 Fiorito, C., P4598, P4623  
 Fiquet, B., P4536  
 Firek, L., P5257  
 Firmann, M., P2291  
 Firmin, D.N., P2388, P4551  
 Firth, W., P586  
 Fischbach, P.S., P776  
 Fischer, D., P2355  
 Fischer, E., P2106  
 Fischer, M., P2099, P5518  
 Fischer, P., P3372, 5225  
 Fischer, R., P406, 2912  
 Fischer, S., P1396  
 Fischer, S.C., P3939  
 Fischer Hansen, J., 1826, P3170  
 Fischman, D., P4733  
 Fisher, J., P678  
 Fisher, M., P1532  
 Fishman, D., P4164  
 Fishman, E., P5545  
 Fisman, E.Z., 3545  
 Fitzgerald, P., 2923  
 Fitzgerald, P.B., P5585  
 Fitzpatrick, A., 245  
 Fitzpatrick, P., P5470  
 Fiumicelli, G., P582  
 Fiutowski, M., 125  
 Fiuza, M., P1455, P2544, P3150  
 Fiuza, M.M., P2295, 2652  
 Flachskampf, F.A., P3868  
 Flambarb, B., P3800  
 Flamm, S., P4815  
 Flannigan, S., P2464  
 Flather, M., 1102, P2097, P2493, P4745  
 Fleck, E., P403, P1321, P2435, P3027, P4200, P4584, P4606, 5212  
 Fledderus, J.O., P2187  
 Fleischmann, B.K., 1247  
 Fleissner, F., P2214, P4524  
 Fleming, I., P3952  
 Flesch, M., P5448  
 Flessas, D., P2364, P3898, P5417  
 Fletcher, A., P4844, 4997  
 Fletcher, R., 131  
 Flevari, P., P792, P2230  
 Flewitt, J.A., P4746  
 Flierl, U., P4589  
 Fliser, D., P4631  
 Floch, F., P570  
 Florzcyk, M., 5183  
 Flores, F., 5086  
 Flores, J., P4685  
 Flores Rios, X., P641, P1499, P1500  
 Flores-Santana, W., P5406  
 Florescu, M., 335, P507, P3354  
 Flu, W.-J., P3047  
 Flu, W.J., 887, 1009, P1706, P2170, P2341, P2509, P2966, P3987, P4633, 4947, 5061, P5252, P5485, P5513  
 Flu, W.J.P., P1445  
 Flyvbjerg, A., P3407  
 Fodri, D., 168  
 Foell, D., 161  
 Foerster, M., P1683  
 Foffa, I., 5160, P5547  
 Fogari, R., P1737, P4839  
 Foglia, B., P3398  
 Fokstuen, S., P3241  
 Foldesi, C.L., P3343  
 Foley, P.W.X., P4249, P5643  
 Foley, R.N., P3327, P3368, P5447  
 Folke, F., 1821, P2290, P3130, P5442  
 Follath, F., P3822, P4926, 5079, 5084, P5688  
 Fommei, E., P4932  
 Fong, A.Y.Y., P4539  
 Fonseca, C., P4853  
 Fonseca, F.A., P2256  
 Fonseca, F.A.H., P3939, P4610  
 Fonseka, M., 250  
 Fontaine, D., P3956  
 Fontaine, G., P3058  
 Fontaine, V., 382  
 Fontana, A., 1001  
 Fontana, F., P3156  
 Fontana, M., P822, P1680, 2767, P5368  
 Fontanella, B., P3830  
 Fontanelli, A., P450

- Fontanive, P., P844  
 Fonte, M.F., P4567  
 Fonte, M.L., 344  
 Fontes, P., 1825, P5496  
 Fontes Carvalho, R., P3358, P4915  
 Fontes-Carvalho, R., P818  
 Fontes-Sousa, A.P., P411, P837  
 Foote, A., P1492  
 Forastiere, F., P1719  
 Forbes, J.M., 5135  
 Forcada, P.J., P3926  
 Forclaz, A., 3657, P4828  
 Ford, I., 241, 1254, P4220, P4751  
 Foreman, A.J., P1578  
 Forestier, M., P4593  
 Forfang, K., 5224  
 Forgione, L., P3248  
 Forkmann, M., P3385  
 Forleo, C., 3778, P4215, P4247  
 Forleo, G., 5217  
 Forman, S.A., P3853  
 Formenti, A., P1356, P1357  
 Formichi, B., P1597  
 Formisano, F., P4879  
 Formosa, M.F., 5135  
 Formuszewicz, R., P4717  
 Forno, D., P5571  
 Forslund, L., P4173  
 Forst, S., P1412  
 Forster, O., 2769  
 Forster, T., P2442, P3280  
 Forstermann, U., P3957  
 Forte, P., P3052  
 Forteza Alberti, J.F., P4792, P4793  
 Fortmueller, L., 3779  
 Forsys, J., P3054  
 Fosbol, E., 882  
 Fosbol, E.L., P3130  
 Fosch Mur, X., P788  
 Foss, A.F., P3962  
 Fossaa, A., P4634  
 Fossaa, S., P4634  
 Foster, W., P4518  
 Fountas, N., P1471  
 Fountoulaki, K., P3106, 5144  
 Fouquet, R., P2316  
 Fourcade, J., P3835  
 Fourcade, L., P5582  
 Fourcade, O., P3828  
 Fourey, D., 1117  
 Fourlas, C., P4907  
 Fournial, G., P4740  
 Fournier, A., P1628  
 Foussas, S.G., P2962, P2986, P3163, P4031, P4218  
 Fox, J.C., P5679  
 Fox, J.P., P4103  
 Fox, K., 1799, P4198, 4995  
 Fox, K.A.A., 888, P1426, 1797, P3836, P3839, P3844  
 Foxwell, B.M.J., 379  
 Fraccarollo, D., 385, P2482, P3966, 5055  
 Fraga, R.F., P4025  
 Fragasso, G., P2419, P2504  
 Fragata, A.A.F., P4567  
 Fragkaki, M., P608  
 Fraisse, A., P1574, 5176  
 Frampton, C.M., P541  
 Francart, C., P2372  
 Franceschi, F., 1904, P5635  
 Franceschini, L., P1300  
 Franchi, E., P1542  
 Franchi, F., P728  
 Franchini, A., P1678  
 Franchini, K., 2015  
 Franchini, K.G., P2530, P3403, P4942  
 Francino, A., P3235, P3245  
 Francis, D.P., P2465, P4766, P4768  
 Francis, F., 5155  
 Francis, J.M., P617, P3988, P4542, P5340  
 Francisco, V., P2276, P2297  
 Franco, D., P4481  
 Franco Duran, O.H., 3531  
 Francone, M., P470  
 Frangi, A.F., P577, P5636  
 Frangogiannis, N.G., P5483  
 Frank, E., 2915  
 Frank, H., P1614  
 Frank, K., P561  
 Frank, R., 1902, P3058, P4166  
 Franke, A., P548  
 Franke, J., P636  
 Franke, V., P1339  
 Franke, W.W., P2308, P3079  
 Franken, M., 1150, P2999, P3005  
 Franken, R.J., 2001  
 Frankenstein, L., P636, P2524, 2768  
 Frantz, C., P1604  
 Frantz, S., P4245, 5055  
 Franz, A., P3055  
 Franz, M., P1683  
 Franz, W., P5653  
 Franz, W.M., 2912, 2915, P3082  
 Franzen, O., 5158  
 Franzini, M., P5567  
 Franzone, A., P1686  
 Franzoni, I., 5056  
 Franzosi, M.G., 134, P412, 1104, P1660, P2495, P2518, P4206, 5085, P5680  
 Fraser, A.G., P5602, P5654  
 Fraser, D., P1554  
 Frassi, F., P1703  
 Fratini, S., 1095  
 Fratino, L., P1694  
 Fratta, F., P2370  
 Fratta Pasini, A., P2278  
 Frattini, S., P3001, P4691  
 Frederix, G., 4960  
 Fredrikson, M., 2821  
 Freedman, S.B., P592  
 Freel, E.M., 240  
 Freeman, L.J., P613  
 Freese, M., 5078  
 Freimark, D., P2227  
 Freising, C., P1633  
 Freitas, A.I., P533, 3775, P4642, P4683, P4687  
 Freitas, C., P4642, P4683  
 Freitas, D., P4018  
 Freitas, J., P802  
 Freitas, M., P426, P428, P439, P711, P2973, P2974, P3000, P3827, P3832, P4225, P4537, 5185  
 Freitas, S., P533, 3775, P4642, P4683, P4687  
 Freixa, X., P2983, 5147  
 Frenay, M., P3018  
 Frenneaux, M., 166, P1714, P2494, P3346, P4880, P4885, P4891, P4901  
 Frenneaux, M.P., P604, P1459, P1561, 3639, P3965, P4249, P4471, P4883, 5179  
 Frere, C., 5117, 5119  
 Fresneda-Moreno, J., P4235  
 Fressart, V., P3058  
 Fressonnet, R., P2347  
 Frey, N., P1586, P3234  
 Frey, R., P1577  
 Freynhofer, M., 5108  
 Freysz, L., P508, P4110  
 Friart, A., 5226  
 Frick, M., P2333, P2335, P4238, P4626, P4884  
 Friebe, D., 3528  
 Friedenberger, J., P5295  
 Friedli, B., P673  
 Friedman, Z., P5360  
 Friedrich, D., P4478  
 Friedrich, E., P4478  
 Friedrich, E.B., P3102  
 Friedrich, G., P1350, 5241  
 Friedrich, M.G., P2137, P4746  
 Frigerio, S., P5520  
 Friis, T., 2816  
 Frilling, B., P2412  
 Frimerman, A., P4211  
 Frishman, W., P1670  
 Frisinghelli, A., P4204  
 Frisso, G., P3248  
 Fritsch, M., P2266  
 Fritzenwanger, M., P1683  
 Fritzsche, J., P4606  
 Froehlich, G.M., P5604  
 Froehlich, K., P417  
 Frogoudaki, A., P4803  
 Frohlich, J., P4002  
 Frohn-Mulder, I., P3243  
 Fromer, M., P4865  
 Frommeyer, G., P565, P2418  
 Frommolt, P., P5448  
 Frost, G., P594  
 Frost, L., P5531  
 Frostegard, J., P1480, P4658, P4661  
 Fruehauf, M., P4187, P4871  
 Fruhwald, F., P811  
 Fruhwald, F.M., 5223  
 Fruntelata, A., P5644  
 Frusca, T., P862  
 Frustaci, A., P1265, P3271  
 Frustaci, S., P1263  
 Frutuoso, C., P802  
 Fry, E.T., P686  
 Frycz-Kurek, A.M., P451  
 Frystyk, J., P3407  
 Fu, M., P3100, P3370, P3963, P4237  
 Fu, Z., P3328  
 Fu, Z.Z., P5718  
 Fuat, A., P5673  
 Fuchs, A.R.C.N., P583  
 Fuchs, F.D., P4945, P5432  
 Fuchs, M., P2355  
 Fuchs, S., P667, P1507, P4061, P4068, P5277  
 Fuchs, S.C., P4945, P5432  
 Fuchs, T., P5498  
 Fuente, R.N., P2484  
 Fuernau, G., P432, P1339, P1340, 2822, P2956, P5295  
 Fuernkranz, A., P757, P1644, P4832  
 Fuerster, T., 4971  
 Fueth, R., P4902  
 Fugedi, K., P3045, 5219  
 Fujibayashi, K., P4629  
 Fujii, M., P814, P4262  
 Fujii, S., P691, P4038  
 Fujii, T., P4180  
 Fujii, Y., P2216, P3215, P3416, P5541  
 Fujimaki, T., P445, 1013, P3057, P3997, P4014  
 Fujimoto, A., P3805  
 Fujimoto, N., P4876  
 Fujimoto, S., 393  
 Fujimoto, Y., P693, P1514  
 Fujimura, N., P2216, P3215, P3416  
 Fujinaga, H., P1359  
 Fujioka, T., P5437  
 Fujishima, Y., P5437  
 Fujita, H., P826, P5248  
 Fujita, M., P2487, P4237, P4517, 5001  
 Fujiwara, H., P759, P1367, P2478, P2483, P3015, P5515  
 Fujiwara, T., P2478, P2483, P5515  
 Fukai, T., P4476  
 Fukaya, H., P554, 3659  
 Fukazawa, R., P4754  
 Fuku, Y., P668, P690, P691, P4038  
 Fukuda, K., P4495  
 Fukuda, N., P4005, 5229  
 Fukuda, Y., P4005, P5605, P5650  
 Fukushima, K., P1503  
 Fukuzawa, S., P437  
 Fulford, J., P604  
 Fulmanski, P., P3054  
 Fumagalli, S., 1899  
 Funada, J., P4062  
 Funahashi, H., 1127, P1361  
 Funck, R., P3279  
 Funck-Brentano, C., P1333  
 Furber, A., P4492  
 Furenes, E.B., P2288  
 Furgi, G., P590  
 Furian, L., P4761  
 Furiozzi, F., P3893  
 Furlani, D., P3088, P3095  
 Furmenko, G.I., P2302  
 Furniss, S.S., 248, 250  
 Furundzija, V., P4606

- Furuya, S., P4630  
Fusco, A., 2917, P5610  
Fuster, J.J., 377  
Fuster, V., 892, P2113, P3377, P5407
- Gaasch, W.H., 5049  
Gabe, E.D., P5578  
Gabe, J.P.N., 5009  
Gaber, M., P4119  
Gabinsky, J.L., P3077  
Gabriel, H., P4101, 5164  
Gabriel, J., P774, 1825, P5496  
Gabriel, L., P3228  
Gabriel, R., P5454  
Gabriele, M., P461  
Gabielli, D., P4575  
Gabielli, F.A., 5077  
Gabrielsen, A., P4608  
Gabutti, A., P5368  
Gabutti, G., P4228  
Gachet, C., P1307, P1312, P2090  
Gackowski, A., P753, 2772  
Gad, M., P2500  
Gaddi, O., P4116  
Gadesam, R., P4603  
Gaebel, R., P3088  
Gaemperi, O., 396, 399, P2078, P3011, P3033, P4562  
Gaensbacher, B., P2279, P2975  
Gafarov, V., P3151, P3152  
Gafarova, A., P3151, P3152  
Gagarina, A., P1432  
Gago, P., P2129  
Gagulin, I., P3151, P3152  
Gaillard, C.A.J.M., P5656  
Gaio, G., P2370, 5178  
Gaita, D., P414, 1795  
Gaita, F., 5120  
Gajdos, M., P1740  
Galaktionova, E.E., 2783  
Galal, W., P1445, P3978  
Galan, A., P435  
Galanopoulos, G., P5664  
Galasso, G., P2191, P4084, P4719  
Galati, G., 344, P1478, P3236, P3239  
Galati, M.C., P2080  
Galatius, S., P1556, P2114, P2117, P2942, 5206  
Galbiati, V., 168  
Galderisi, M., 1124, P1528, P2168, 2867, P3885, P3889, P4470, 5130, P5645  
Gale, C., P3844  
Gale, C.P., 242, 988, 1797, P5361  
Galema, T., P1285  
Galie, N., P1571, P1579, P1589, 5172, 5173  
Galie', N., P722, P1598  
Galimbert, P., 233  
Galinier, M., P1463, P3351, P3828, P3835  
Galizio, N., 1912, P2468  
Gall, N., P799  
Gallani, M.C.J., P2530  
Gallego, L., P3842  
Gallego, M., P4196  
Gallego Garcia De Vinuesa, P., P4784, P4786, P4790, 5161, P5492  
Gallego Parra, L., 5011  
Gallez, B., P3959  
Galli, E., P5651  
Galli, M., 5195  
Galli, S., 5071, P5511  
Gallimore, A., P1575  
Gallina, S., 1124, P2231, P4937  
Gallinghouse, G., P1620, P2448  
Gallino, A., P1372  
Gallo, P., 2866  
Gallo, R., P2131  
Galloe, A., P1556, 5206  
Galovcova, M., P5494  
Galrinho, A., P5600  
Galuppo, P., P2482, 5055  
Galuppo, V., 904, 2916  
Galvani, M., P4738, P5267  
Galvin, J., 251  
Gama, V., P3024, P4915  
Gamba, A., 1001
- Gambarin, F.I., P486, 1212, 5039, P5484, P5671  
Gambert, P., P5316  
Gambetti, S., P722, P1571, 5172  
Gambino, A., 1003, P2948  
Gamble, G.D., P1479  
Gamez, A., 2000  
Gamez Martinez, J.M., P788  
Gammon, B., P5532  
Gamra, H., P1326, P4042  
Ganame, J., 1253, P1342, P5330  
Gandara, F., P4853  
Gandhi, K., P1670  
Gandjbakhch, E., P3058  
Gandjbakhch, I., P516  
Gandolfi, E., P5641  
Ganem, F., P2999, P3005  
Ganotakis, E., P2257, P2259  
Gans, R., P3840  
Gans, R.O.B., P1448  
Ganser, C., P539, 3771  
Ganum, G., P3021  
Ganz, F., 168  
Gao, L., P760, P1631, P2420, P4055  
Gao, P., P3397  
Garau, P., P4743  
Garbade, J., 1012  
Garber, A.J., P5247  
Garbin, U., P2278  
Garbocz, P., P3918  
Garcia, B., P4036  
Garcia, D., P2369  
Garcia, E., P671, P4737  
Garcia, F., P839  
Garcia, M., P1378, P1692  
Garcia, M.J., P2113, P3377  
Garcia Algas, F., P4792, P4793  
Garcia Bueno, L., P596  
Garcia Campo, E., 1910  
Garcia Campos, A., P596, P1499  
Garcia Del Blanco, B., P4058  
Garcia Dorado, D., P4058  
Garcia Fuertes, D., P5320  
Garcia Garcia, A., P5473  
Garcia Guerrero, J.J., 1910  
Garcia Montes, J.A., P2375  
Garcia Moran, E., P3051  
Garcia Quintana, A., P5623  
Garcia Sanchez, A., P788  
Garcia Seara, F.J., P5603  
Garcia Seara, J., P441  
Garcia-Acuna, J.M., P441  
Garcia-Alonso, A., 3661  
Garcia-Alvarez, A., P438, P1559, P5691  
Garcia-Arguinzonis, M., P5416  
Garcia-Blas, S., 289  
Garcia-Camarero, T., P841  
Garcia-Dorado, D., 1007, 1010, P1387, P4485, P5355  
Garcia-Dorado, D.G.D., 1008  
Garcia-Fernandez, F.J., P3342  
Garcia-Garcia, H., 4954  
Garcia-Garcia, H.M., P696, 897, P1509, P1735, P1742, 2930, P4046, P4076, P4077  
Garcia-Hernandez, F., P1572  
Garcia-Honrubia, A., 1211, P3266  
Garcia-Moll, X., P3007  
Garcia-Rafanell, J., P3207  
Garcia-Robles, J.A., P4229  
Garcia-Ruiz, J.M., P3129  
Garcia-Sanchez, J.I., P4235  
Garcia-Tejada, J., P2357  
Garcia-Touchard, A., P773, 3656  
Garcin, S., 389, P738, 976  
Gardini, C., P2419, P2504  
Gardiwal, A., P849  
Garefalakis, C., P2986, P3163  
Garg, S., P4073  
Gargalianos, P., P5587  
Gargani, L., P433, P513, P1703  
Gargaro, A., 5222  
Gargiulo, G., P1408  
Garibaldi, S., P4516, P4616  
Garipey, J., 133  
Garipov, R., 246, P786
- Garlichs, C.D., P467, P3958, P4063, P5498, P5569  
Garramone, B., 5077  
Garrido, I.P., P2525  
Gary, R.A., 123  
Garzia, A., P1490  
Garzillo, C.L., P2069, P2071, P3158, P5480  
Gascon, J., P1559  
Gasior, M., P451, P474, P870, P3143, P3849, 5240, P5273, P5278, P5279, P5287, P5288, P5293, P5307, P5309  
Gasior, Z., P2239, P2315, P5321  
Gaspar, A., 1149, 2679, P2960, P3002, P3038, P3193, 4977  
Gaspar, T., P764, P4187, P4854, P4871  
Gaspardone, A., P2354  
Gasparini, G.L., P3217  
Gasparini, M., 233, 1899, P5627  
Gasser, R., P4531, 5131  
Gasser, S., P4531  
Gastaldi, D., P5520  
Gaszner, B., P2211  
Gatehouse, P.D., P4551  
Gatta, L., 4962  
Gattenloehner, S.G., 2861, P4105  
Gatti, G., P862  
Gatto, L., P3175, P4534, P4703  
Gattono, M., 981  
Gatzoulis, K., P781  
Gatzoulis, K.A., P4149  
Gatzoulis, M.A., P2386, P4765, P4766, P4768, P4785, P4803, 5180  
Gaub, R., 1123  
Gaudin, C., 2779, 2781  
Gaudio, G., 5056  
Gaudron, P.G., P3897  
Gaunt, R.M.C., P1734  
Gavaruzzi, G., P2079  
Gavazzi, A., P1551, P2094, P4532  
Gavin, A., P5552  
Gavina, C., P4895  
Gawaz, M., P695, P1633, P2452, 2680, P3096, 3772, P4613, P4780, P4867, 5232, P5311  
Gay-Jordi, G., P557, P4641  
Gayat, E., P4240, 5079  
Gazdic, P., P868  
Gazdic, T., P729  
Gaze, D., P5673  
Gaztanaga, J., P1378  
Gazzola, C., 1903  
Ge, J., P1534, 2927  
Ge, J.B., 2777, P5574, P5597  
Ge, L., P1534  
Gebhard, C., P3365  
Gebhardt, C., P3366  
Gebker, R., P3027  
Gegenhuber, A., 158  
Gehring, M., P1540  
Geigle, P., P3062  
Geisler, T., 2680, 3772, P4867, 5232, P5311  
Geissdoerfer, W., P3794  
Geist, V., 5202  
Gekas, J., P3092  
Gelatti, U., P1659, P5638  
Gelbrich, G., P417, P1269, P4245, P4897, P4914, P5670  
Geleijnse, M.L., P493, P2147, P2166, P3381, P3902, 5171  
Geijlins, A., P856, P858  
Geller, C., P4182  
Geller, J.-C., P4188  
Geller, J.C., P2461, P4174, P4827  
Geller, L., P3309, P5615, P5626  
Geloneze, B., P4019  
Gelwix, C., P2124  
Gemein, C., P807  
Gemignani, V., P1712  
Gendlin, G.E., P836  
Genead, R., P3071, P5556  
Geneau De La Marliere, S., 1112  
Genest, J., P5422  
Gennadi, A., 386, P2539, P3146, P3400, P4267  
Genoni, M., P4609  
Genovesi, D., P4576  
Genovesi, E., P654

- Gensini, G.F., 155, P1325, P1592, P3023, P3331, P5472, P5499, P5536  
 Gentiloni Silveri, N., P3834  
 Geny, B., P1676, P2328, P3392  
 George, J.L., P3844  
 George, R.S., P2334, P2336  
 Georgiadou, P., P3251  
 Georgiev, K., P3256  
 Georgii, B., P2342  
 Georgiopoulos, G., P4944, P5446  
 Georgiopolou, V.V., P4222  
 Georgopoulos, S., P4697  
 Georgoula, G., P1487  
 Gepner, K., P1668, P3262  
 Geppert, A., 5108  
 Geppert, A.G., P709  
 Gerard, M., P3228  
 Gerber, R.A., P2502  
 Gerber, R.T., P1544, P2087, P3176, P3201, 5197  
 Gerckens, U., P4143  
 Gerdes, N., P4590  
 Gerds-Li, J.-H., P403, P2435  
 Gerds-Li, J.H., 5212  
 Gerds, E., 159, P863, P865, P4100, P4106, P5570  
 Gerecke, B., 346  
 Germanakis, I., P3049  
 Germans, T., P3389  
 Germing, A., P1530  
 Germond, M., 976  
 Gerne, O., P3040  
 Gerosa, G., 1003, P2330, P2948  
 Gersbach, P., 2820  
 Gersh, B.J., 5189, 5210  
 Gershlick, A.H., P661  
 Gerstein, H.C., P696, P1735, 5081  
 Gerth, A., P4836, P4841  
 Gerull, B., P3244  
 Gervasoni, R., P5586  
 Gessler, P., P4779  
 Geudelin, B., P2965  
 Gevaert, S., P2936, 5153  
 Gewillig, M., P4805, P4810  
 Ghaboura, N., P4492  
 Ghaleb, B., P2474, P4494  
 Ghanem, G., P3119  
 Gharib, A., P3875  
 Ghazy, M., P2387, P4558  
 Ghenim, R., P4740  
 Gheorghiadu, M., P2502, P4203  
 Gheorghiu, G., P1395  
 Gherardi, S., P1528, 2867, P3885, P3889, P3890, P5347  
 Gherghina, I., P4271  
 Ghiadoni, L., P1458, P2207, P3414  
 Ghiglia, S., P4775  
 Ghigo, D., P1330  
 Ghio, S., P735, 1212, P2168  
 Ghiorghe, S., P3138  
 Ghiorghiu, I., 1999, P4817  
 Ghofrani, H.A., P1577, 5173  
 Ghosh, S., P5684  
 Giacca, M., P4244  
 Giacomantonio, N.B., P586  
 Giagini, A.T., P5490  
 Gialafos, E., P3044, P5345  
 Gialeraki, A., P5393  
 Gialernios, K., P635, P878, P4933  
 Gialernios, T.H., P635, P878, P4933  
 Giamarellou, H., P2241  
 Giammaria, M., P5571  
 Giammarinaro, M., P662  
 Giamouzis, G., P2144, P2513, P4222  
 Gianfagna, P., P750, P3363  
 Gianfaldoni, M.L., P433  
 Gianiorio, F.E., P5669  
 Giannakopoulos, A., 165, 2641  
 Giannakoulas, G., P2386, P4765, P4766, P4768, P4803, 5180  
 Giannarelli, C., 892, P3377, P5407  
 Giannessi, D., P4628, P4932  
 Giannini, C., P1606, P4931  
 Giannini, D., P5505  
 Giannini, G., 1925  
 Giannitsis, E., 4978  
 Giannoglou, G.D., P1477, P3936  
 Giannoni, A., P1680, 2767  
 Giannopoulos, G., P781, P3330, 5145, P5297, P5341, P5345, P5351  
 Giannotti, F., P699  
 Giannuzzi, P., 981  
 Giardina, A., P2354  
 Giatrakos, I., P4928, P5298  
 Giatti, S., P5645  
 Giazitzoglou, E., P4044  
 Gibbons, S., P3384  
 Gibbs, J.S.R., P739, P748, P1576, 5167  
 Gibbs, S.D.J., 5057  
 Gibbs, S.J.R., P512  
 Gibelin, P., P743, P2151  
 Gibson, D.G., P2386  
 Gibson, K., P1733  
 Gibson, L., P1656, 1909  
 Gick, M., P4053, 5194  
 Gidlund, M.A., P3939  
 Gielen, S., 288, P1411, P2944, P4054, 4959, 4966  
 Gierlak, W., P4917  
 Gierlotka, M., P434, P451, P474, 1148, 1958, P3143, P3845, P3849, P3851, 5240, P5270, P5271, P5273, P5274, P5279, P5287, P5288, P5293, P5307, P5309  
 Giersten, J., P2422  
 Gieszczyk, K., P2239, P5321  
 Gizek, H., P1733  
 Giga, V., P3117, 3565, P3878, P3985, P5331  
 Gigante, B., 3770  
 Giglio, V., P519  
 Gijsen, F.J.H., P3009, P3013, P4625, 4983  
 Gika, H., P3208  
 Gil, J.-M., P5582  
 Gil, R., P3849, P5273, P5279, P5287  
 Gil, R.J., 1125, P4717  
 Gil, V.M., P1465  
 Gilard, M., P2074, P5301  
 Gilbert, J., P2093  
 Giles, J.A., P3020  
 Giles, P., P2273  
 Gillberg, L., 2820  
 Gillebert, T., P3913  
 Gillebert, T.C., 153  
 Gillies, M., 150, P5523  
 Gillis, A., P2471, P2473  
 Gillis, M.-A., P546  
 Gillmore, J.D., 5057  
 Gilman, R.H., P5433  
 Gilmanov, M., P4611  
 Gilmore, A., P1576  
 Gilsbach, R., P1690  
 Gilmuth, H., P2086, P3941  
 Gimelli, A., P4576  
 Gimeno, F., 2926, P3051, P3185  
 Gimeno, G.R., P2365  
 Gin-Sing, W., 5167  
 Gingham, C., 1999, P2183, P2184, 2862, P4817  
 Ginon, I., P4892  
 Gioffre, G., P2354  
 Gioffre, G., P4473  
 Giolis, A., P536, P1287, P2109, P3917  
 Giordano, A., P4578, P4598  
 Giordano, C., P3386  
 Giorgetti, A., P4576  
 Giorgi, R., P4107  
 Giorgio, M., P1305  
 Giorgis, L., P5616  
 Giotsas, N., P1446, P2265  
 Giovane, A., P3946  
 Giovannetti, O., P3809, P3810  
 Giraldez, R.R., P2999, P3005  
 Giraldez, R.R.C.V., 1150  
 Girard, C., P5675  
 Girard, P.M., P4257  
 Girardi, P., P3158  
 Girasis, C., P3857, P4030  
 Girerd, N., 5237  
 Girndt, M., P4631  
 Girschbach, F., P1633  
 Gislason, G., P5442  
 Gislason, G.H., 882, P1439, 1821, P2290, P2299, P3130, P4684  
 Gislason, G.H.G., P1440  
 Gitt, A., P3836, P3839, P5280  
 Gitt, A.K., P434, 1148, 1796, 1958, P2253, P2998, 3543, P3845, P3851, P4512, P4514, P4704, P4715, P4721, P4736, 4993, 4994, 5150, 5151, P5270, P5271, P5274  
 Gittenberger-De Groot, A.C., P572, P573  
 Giuggioli, D., P728  
 Giugliano, G., P5527, P5534  
 Giuliani, G., P665, P699, 4950  
 Giuliani, L., P1542  
 Giuliano, A., P1435, P3807  
 Giurgesa, A., P5516  
 Giusca, S., P1607, P2183  
 Giuseppe Barletta, G.B., 3645  
 Giusti, B., P1325  
 Giusti, S., P2381  
 Gjerdalen, G.F., P4694  
 Gjerde, M., 2821  
 Gjesdal, O., P2175, P4923, P5631  
 Gkouziouta, A., P1700, P4162  
 Gkouziouta, A.G., P3251  
 Gladwin, M.T., P1602  
 Glatz, J., 5177  
 Glauber, M., 5160, P5567  
 Glavas, D., P2223  
 Glavina, F., P5520  
 Gleeton, O., 1251, P4742, 5073  
 Gleiss, A., P4210  
 Glick, A., 1117  
 Gliilutz, H., P3194  
 Glineur, D., 5165  
 Glinser, B., P4626  
 Gloeck, T., 1006  
 Gloekler, S., P3192, P4757, P4758  
 Glogar, D., P2158, P3791, P4032, P4039  
 Gloria, A., P4761  
 Glover, P., P4159  
 Glowacki, J., P2343  
 Gluais, P., P546, P1397, P2510  
 Gluais, P.G., P4500  
 Glunz, H.G., P4721  
 Gluszek, J., P3161  
 Gluud, C., P1299  
 Glynn, R.J., 169  
 Gnanadevan, M., P4880, P4885  
 Gnechi, M., 5138  
 Gnerlich, S., P3096, P5311  
 Gnesi, L., P1454  
 Goanvec, C., P2234  
 Gobbens, P., P1508, P4076  
 Goch, J.H., P2505  
 Godart, F., P1574, P2372  
 Godin, B., 5099  
 Godin, M., P5260, P5261, P5262  
 Godino, C., P1544, P2087, P3176, P4128, 5196, 5197  
 Goebel, B., P2145, P3907, P4923, 4979, 4982  
 Goehler, A., P1585  
 Goehring, S., P4706  
 Goehring-Frischholz, K., P555, P695  
 Goei, D., 1009, P1706, P2170, P2509, P4633, 5061, P5485  
 Goessinger, H.D., P1619  
 Goethals, M., P3345  
 Goetschalckx, K., P3356  
 Goette, A., P4186  
 Goetze, S., 1153  
 Goh, P.P., P833  
 Gohlke-Baerwolf, C.H., P4106  
 Gohlke-Barwolf, C., P5570  
 Goicolea Ruigomez, J., P773, P4735  
 Goicolea-Ruigomez, J., 3656  
 Goitein, O., P1362  
 Gokdeniz, T., 2770  
 Gokosmanoglu, F., P4468  
 Goktekin, O., P4808  
 Gola, A., P2315, P2425, P3918  
 Gold, M., 237  
 Gold, M.R., 238  
 Goldbarge, V., P3392  
 Goldbergova-Pavkova, M., P2987  
 Goldenberg, I., P1667, 3545  
 Goldin, J., P2076

- Goldman, J.H., P2512  
 Goldsmith, S.R., P2490  
 Goldstein, H., P3941  
 Goldstein, P., 5149  
 Goldsworthy, M., P3384  
 Goleanu, V., P4652  
 Golembiewski, S.L., P4717  
 Goletto, S., 5180  
 Golfdberg, S., P4137  
 Goliaasch, G., P3004  
 Golino, P., P801  
 Golla, E., 4972  
 Golmard, J.L., P516  
 Golukhova, E.Z., P415, P855  
 Gomes, R., P611, 1960, P2453, P2454, P2463  
 Gomes, V., P2129  
 Gomez, A.M., P3312  
 Gomez, E., P4801  
 Gomez, G.G., 5068  
 Gomez, I., P2357, P3795, P4113  
 Gomez, R., P579  
 Gomez Anta, I., 1114  
 Gomez Bosch, Z., 1008  
 Gomez Hospital, J.A., P4731  
 Gomez Perez, M., P4094  
 Gomez-Doblas, J.J., 5128  
 Gomez-Lara, J., P4731  
 Gomez-Sanchez, M.A., P716, P718, P723, P4557  
 Gommans, D.H.F., P2163, P3031  
 Goncalves, A., P802, P2317  
 Goncalves, F., P711, P2973, P2974, P3000, P4904, 5185  
 Goncalves, N., P741, P3383  
 Goncalves, P., P1456, 1960, P3227, P5281, P5463  
 Goncalves, S., P3861, P3864, P4469, P5363, P5364  
 Goncalvesova, E., P5475  
 Gong, X., 2777  
 Gonna, H., P2434  
 Gonon, A.T., P4484  
 Gonzalez, A., P598, P2357, P2541, P3060, P4786, P4790, P5439  
 Gonzalez, B., P1721, P3167, P4231  
 Gonzalez, F.J., P457  
 Gonzalez, I., P3051, P3185  
 Gonzalez, J., 1211  
 Gonzalez, J.L., 1912, P2468  
 Gonzalez, M.D., P4181  
 Gonzalez, T., P4196  
 Gonzalez Babarro, E., P441  
 Gonzalez Fernandez, A.E., P5473  
 Gonzalez Juanatey, J.R., P864, 2773, P4254  
 Gonzalez Torrecilla, E., P3342, 5102  
 Gonzalez Vilchez, F., P841  
 Gonzalez-Alujas, M.T., P4089, P4111  
 Gonzalez-Alujas, T., 1007, 1010, P5355  
 Gonzalez-Alujas, T.G.A., 1008  
 Gonzalez-Conejero, R., 1953  
 Gonzalez-Juanatey, J.R., P441, P1399, P1400, P1449, P2272, 3661, P4938, 5004, P5530  
 Gonzalez-Navarro, H., 377  
 Gonzalez-Santos, J.M., P744  
 Gonzalo, N., P1508, P3857, P4073  
 Gonzalo Lopez, N., 897, P1509, 2930, P4046, P4076, P4077, 4983  
 Goodall, A.H., P1405  
 Goode, K., P4214  
 Goode, K.M., P811, P845, P4894  
 Gooiker, D.J., P4802  
 Goovaerts, I., 4960  
 Goppelt-Strube, M., P3958  
 Gordon, A., P5422  
 Gordon, B., P5609  
 Gordon, M., P3190  
 Gordon, P., P2502  
 Gore, J.M., P5686  
 Gorenek, B., P1723  
 Gorenflo, M., P4810  
 Gorgadze, T., P4737  
 Gorgels, A.P.M., P1375, P2981  
 Gorgoulis, V., P5535  
 Gori, A.M., P1325, P5499  
 Gori, T., P1731, P3957  
 Gorissen, W., P3872  
 Gorkiewicz-Kot, I., P1320  
 Gornik, I., P1308, P2340  
 Goromonzi, F., 5216  
 Gosau, N., P5634  
 Gosselin, G., P2131  
 Gosselink, A.T.M., P3213, P5291  
 Gotcheva, N., P4717  
 Gotenhuis, H., P4141  
 Goto, D., P1582  
 Goto, S., 156, P2084  
 Goto, T., P668, P690, P691, P4038  
 Gotsman, I., P4236, P4246, P4260  
 Gotte, M.J.W., P3389, P5632  
 Gotto, A.M., P3122  
 Gottsater, A., 154  
 Gottskalksson, G., P3338  
 Gottwald, U., 346, P3277  
 Gottwik, M.G., P4512  
 Goube, P., P2316  
 Goud, R., P587  
 Goudevenos, I., P1315, P1319  
 Goudevenos, J., P658, P1552  
 Goudis, C., P829  
 Goudis, C.A., P1672  
 Goueffic, Y., P4056  
 Gougnot, S., P508  
 Gougourela, E., P4031  
 Gould, S., P4733  
 Goumans, M.J., 1246, P1428, P2136  
 Gouni, V., P2474  
 Gouni-Berthold, I., P5414  
 Gouriet, F., P4124  
 Gouveia, A., P802  
 Gouzouata, A., P2947  
 Govindan, M., P4189  
 Gow, R., P5451  
 Gowdak, L.H.W., P2957  
 Goya, M., P1717, 1900  
 Gozdzicka-Jozefiak, A., P3935  
 Graber, S., P4631  
 Grabowski, M., P5337  
 Graca, F., P2320  
 Gracia, R., P2525  
 Gradinger, R., P1345, P1376  
 Graefe, M., P2435  
 Graf, I., P1313  
 Graf, K., P1321, P4584, P4606  
 Graf, S., P2158  
 Graf-Bothe, C., P1497  
 Graham, A., P4002  
 Graham, I.M., 129, P3979, P5452, P5458  
 Graham, J., P3084  
 Grajek, S., P2396, P3196, P3964  
 Gralec, R., 5230  
 Gramley, F., P1618, P1630, P4505, P4874, P5399  
 Gramlich, M., P526  
 Grana, D.R., P4482  
 Grancelli, H., P2310, 5244  
 Grande, P., 287, P1299  
 Granger, C., P5686  
 Granger, C.B., 5081  
 Granieri, C., P4215, P4247  
 Grant, P.J., P2102, P2104, 5118  
 Grapow, M., P2414  
 Grapsa, A., 898  
 Grapsa, E., P861  
 Grapsa, J., P739, P748, P752, P1612, 5167, 5170  
 Gras, D., 1902  
 Grassi, G., 168, 1017, P3402, P3406, P4022, P5246, P5714  
 Grassi, M., 1108  
 Grasso, A., P1262, P3174, P3178  
 Grasso, M., 1212, 5039, P5484, P5671  
 Grassos, H., 395, 2641  
 Gratsiansky, N.A., P3996  
 Grau, M., P632, P2298, P3133  
 Grauhan, O., P489  
 Graves, K., P4609  
 Gravholt, C.H., P4816  
 Gravino, R., P4785  
 Grawning, J., P1414  
 Gravos, A., P4702  
 Gray, J., P4521  
 Greaves, K., 2870  
 Grebe, C., P1415  
 Grebe, E., 288, P3823, P5295  
 Grebe, M., P455, P1396, P1531, P3953, P4496  
 Green, J.D., P2137, P4746  
 Green, T., P816  
 Greenbaum, A.B., P686  
 Greenberg, B., P2519, P4252  
 Greenberg, B.H., 1101, P2486, P5658  
 Greenleaf, J.F., P481  
 Greenstein, A., P3110  
 Greenwood, D.C., 1797  
 Greenwood, J.P., P2526  
 Greenwood, R., P604  
 Greer, G.S., P839  
 Greere, V., P4652  
 Gregan, S.M., 379  
 Gregori, D., 2867, P3172  
 Gregorini, F., P1435, P3807, P5694  
 Gregorini, G., P4910  
 Gregorio, G., P1565  
 Greil, G., P4796  
 Gremmel, T., P1323  
 Grenne, B., P3865, P5313  
 Gretsarsdottir, S., 3776  
 Gretler, D.D., 2678  
 Griebenow, R., P2971  
 Grierson, R.A., P2994  
 Griffo, R., P580, 981, P4835  
 Grifoni, E., P1592, P3331  
 Grifoni, S., 236, P701, P714, P719, 5184, 5186  
 Grigioni, F., 337  
 Grignola, J.C., P716, P718, P723, P4557  
 Grigoratos, C., P1458, P5249  
 Grigore, M., P2165  
 Grigorian, L., P1449, P4259, P5530  
 Grigorian Shamagian, L., P1400  
 Grigoryan, S., 5103  
 Grigoryan, S.V., P3329  
 Grikstaite, E., P519  
 Grillo, M.T., P750, P3363  
 Grimaldi, A., P1469  
 Grimaldi, L., P5722  
 Grimaldi, T., P5695  
 Grimm, G., P5653  
 Grimm, M., 5131  
 Grimm, R., P5349  
 Grimm, R.A., P5630  
 Grinberg, M., P4091  
 Grinevich, Y., P4611  
 Grinfeld, D., P535  
 Grinfeld, L., P535  
 Grinfeld, L.R., P686  
 Grinnemo, K.H., P3071, P5556  
 Griol-Charhbil, V., P3249, P3288  
 Grip, L., P1741, P2979, P3223  
 Gritsopoulos, G., P1383  
 Gritti, M., 5104  
 Grize, L., P622  
 Grobbee, D.E., P4887  
 Groben, L., P1645, P4170, 5213  
 Groch, L., P3081  
 Grocott-Mason, R., P3048  
 Grodzicki, T., 163  
 Groen, H.C., P4625, 4983  
 Groenewold, S., P2266  
 Groenink, M., P1381, 2001, P4141  
 Groenke, S., P561, P1447  
 Grohmann, A., P789  
 Grojean, S., P4536  
 Gromov, D., 2826  
 Gromova, E., P3151, P3152  
 Grong, K., 293, P3811  
 Gronlund, H., P4658, P4661  
 Gronthos, S., P3085, P3313  
 Groothuis, A., P2323, P4069, P4619, P4760  
 Gross, H., P2332  
 Gross, M., 2818  
 Grosse, A., P4174, P4182, P4827  
 Grossi, E., P1564, P3172  
 Grossniklaus, D., 123  
 Grotowski, T., P3935  
 Grove, E.L., P1322  
 Grozdic, I., P3117  
 Grube, E., 3653, P4143

- Grube, M., 3658  
 Gruber, F., P5405  
 Gruchala, M., P4515  
 Gruenig, E., P1586, P3256  
 Gruenwald, H., P4248  
 Grueter, T., P2428  
 Grujic, M., P2433, P3322, P3985, P4194  
 Grundmann, S., 1246, P5404  
 Grundt, H., P830, P2277, P2969  
 Grundtvig, M., P4230  
 Grussmannova, K., P5640  
 Grygier, M., P3196, P3964  
 Grzesiak, A., 239  
 Grzybowski, J., 2043  
 Guagliumi, G., P645, P4072, 5210, 5211  
 Gualco, A., P2518  
 Guallar, E., P1473  
 Guan, J., P5596  
 Guan, K., P1415  
 Guan, L.H., P520, P2363  
 Guaraldi, G., P4571  
 Guardado, J., P2491, P4530  
 Guarini, P., 2866  
 Guarinos, J., P2115  
 Guarnieri, G.L., P4837  
 Guasch, E., P435, P557, P1617, P2983, P3291, P3292, P3302, P3305, P3337, P4641  
 Guastello, L., P2095  
 Guazzi, M.G., P5677  
 Guazzotti, G.P., P4232  
 Gucun, M., P3357  
 Gudbjartsson, D.F., 3776  
 Gude, E., 243  
 Gude, F., P441  
 Gudgalis, N., P5715  
 Gudjoncik, A., P3859  
 Gudjonsson, T., P3144  
 Gudnadottir, G.S., P3135  
 Gudnason, T., 978, P3135, P3144  
 Gueant, J.L., P3916  
 Gueant-Rodriguez, R.M., P3916  
 Gueder, G., P417, 5082, P5670  
 Guedes, A., P3228  
 Guedes Do Rego, A., P3998  
 Guedes Do Rego, M., P3998  
 Gueffet, J.P., P3831  
 Guenduez, D., P455, P1531, P3951, P3953, P4489  
 Gueneron, J., P601  
 Guenoun, M., P803, P1718, P2521  
 Guenther, F., P5352  
 Guenther, R., P3056  
 Guenther, R.W., P3029  
 Guentner, S., 5082  
 Gueret, P., P631, P3887, P4251, 5162, P5630  
 Guerin, P., P2347, P4056  
 Guerra, F., P4620  
 Guerra, P., P754, P805, 3660  
 Guerrero, F., P2234  
 Guerrero, J., P606  
 Guerri-Guttenberg, R.A., P4482  
 Guerriero, R., P1408  
 Guevara, E., 1912, P2468  
 Guida, P., P584, P4215, P4247  
 Guidalotti, P.L., P3239  
 Guido, M., 2016  
 Guidotto, T., P5610  
 Guiducci, V., 5195  
 Guijarro, C., P2272  
 Guilbert, A.S., P1676  
 Guillis, M.A., P2193  
 Guillon, B., P2347  
 Guimaraes, A.A., P1696  
 Guimaraes, G.V., P583, P5699  
 Guimaraes, M.J., 1002  
 Guimaraes, P., P774, 1825, P5496  
 Guize, L., P5444  
 Gul, M., P3195  
 Gulati, G., P3086  
 Gulcher, J., 3776  
 Gulec, S., P1539, P2225  
 Guler, A.L., P674  
 Gullestad, L., 243, 1100, P1674, P4230, P5501, P5606  
 Gummert, J., P2145  
 Gumprecht, J., P3230  
 Gumus, M., P3357  
 Gunarathne, A., P2424  
 Gunarathne, H.M.I., P5532  
 Gundermann, C., P3019  
 Gunduz, D., P5282  
 Gunduz, S., P2411, 2770  
 Gunebakmaz, O., P2533, P3362  
 Gunturk, E., P2533  
 Gupta, S., P4518  
 Guralnik, J.M., 169  
 Guranda, D., P679  
 Gurbel, P.A., P676, P681, 2678  
 Gurel, E., P483, P485  
 Gurfinkel, E.P., P3021, P4621  
 Gurgenyanyan, S., P1726  
 Gurghean, A.L., P4899  
 Gurieva, I., P1444  
 Gurovich, V., P4211  
 Gurzu, B., P825  
 Gus, M., P4945, P5432  
 Guschina, V.M., P836  
 Guseva, G., P4511  
 Gussi, I.L., P2183  
 Gustafsson, F., 5076, P5673  
 Gustafsson, I., P5663  
 Gustafsson, U., P2176  
 Gustavo Risau, G., P1501  
 Gutberlet, M., P432, 1012, P1339, P1340, 2822, P2956  
 Guterbaum, T.G., P1440  
 Guterbaum, T.J.G., P3962  
 Gutierrez, C.G.L., P1666  
 Gutierrez, H., P3185  
 Gutierrez, R., P1720  
 Gutierrez-Chico, J.L., P4054  
 Gutierrez-Landaluce, C., P773  
 Gutleben, K.-J., P4552  
 Gutleben, K.J., P5647  
 Guttilla, D., 5046  
 Guzman, L.A., P1309  
 Guzun, L., P1409  
 Gwechenberger, M., P1619, 1901  
 Gwon, H.C., 1096  
 Gyoengyoosi, M., P3791, P4032, P5405  
 Gyongyosi, M., P4039  
 Gziut, A.I., 1125  
 Ha, S.J., P5367  
 Haack-Soerensen, M., 2816  
 Haas, B., 884, P2128, 2650, 3540, P4657  
 Haas, G.-M., 3538  
 Haas, G.M., P3974  
 Haas, J., P4605  
 Haas, T., 5131  
 Haass, M., 5049  
 Haaverstad, R., 293, P3391  
 Habara, M., P1505  
 Habara, S., P668, P690  
 Habedank, D., P5624  
 Haberkra, M., P2239, P5321  
 Haberstock-Debic, H., 5115  
 Habets, J., P4528  
 Habib, G., P1716, 1904, P4107, P4124, P5635  
 Habib, N.M., P1601  
 Hachicha, Z., P4104  
 Hachul, D., P763  
 Hachul, D.T., P4698  
 Hackajlo, D., P1684, P3905  
 Hacke, W., P4198  
 Hackeng, C.M., 2682  
 Hada, Y., 5000  
 Hadamitzky, M., 1260, P3035, 5114  
 Haddad, F., P5692  
 Haddad, H., P1720, P2523  
 Haddad, J., P3119  
 Hadid, C., P3342, 5102  
 Hadjiphilippou, S., 1241  
 Hadoko, P.W., P4597  
 Hadrich, M., P2353  
 Haeck, J.D.E., P3098, 3569  
 Haeggstrom, J.Z., P4608  
 Haelg, C., P669  
 Haendeler, J., P5373  
 Haensel, L., P3375  
 Haerer, W., P4706  
 Haertel, F., P3951, P3952, P4489  
 Haertel, F.V., P455, P1531, P3953, P4475  
 Haeusermann, E., P4779  
 Haeusler, K.G., 3651  
 Hagege, A.A., P2395  
 Hagen, B., P2971  
 Hagen, M.E., P3880  
 Hager, A., P4778, P4798, P4800  
 Haghi, D., P3290  
 Hagikura, A., P476, P3983, P4667, P4678  
 Hahalis, G., P2138  
 Hahn, G.R., P5266  
 Hahn, J.Y., 1096  
 Hahn, S., 5072  
 Haider, K.H.H., P3073  
 Hailan, A., P678  
 Hainque, B., P3058  
 Haissaguerre, M., P1629, 3657, P4158, P4828, 5097, 5122  
 Hajek, P., P3219  
 Hajek, T., P1368  
 Hajjar, R., P1692, P5407  
 Hajkova, J., 4990  
 Hajnoczky, G., P530  
 Halbach, M., P3066, P3072  
 Halfwassen, U., P3823  
 Halimi, F., P1648  
 Hall, A.S., P2937  
 Hall, J.A., P5284  
 Hall, L., P3816  
 Haldin, M., P4658  
 Halle, M., P2213, P4541, P4897  
 Hallen, J., P2965  
 Halley, D.J.J., P3247  
 Hallmans, G., P4661  
 Halmaj, L., P3280  
 Halmosi, R., P1418  
 Halperin, J., P4198  
 Haltmayer, M., 158  
 Haluska, B.A., P875, P5453  
 Halvorsen, B., P1674  
 Halvorsen, P.S., 292  
 Halvorsen, S., P2122, P3877, 5154  
 Hamada, M., P5318  
 Hamadou, N., P3147  
 Hamano, G., P413  
 Hamasaki, S., P633  
 Hamberg, M., P4608  
 Hambrecht, R., P2480, P2944, P2950, P2951, P4755, 4959, 4966  
 Hamdan, A., P3027  
 Hamdan, H., P5253  
 Hamdi, S., P2991  
 Hamdy, A., P3906  
 Hamed, G., P798  
 Hameed, R.S., 2645  
 Hamilos, M., P4749, P4753, 5117  
 Hamilos, M.I., P1547  
 Hamilton, A., 253, P4159, P5434  
 Hamilton, B., P3315  
 Hamilton, M., 2004  
 Hamilton, M.C.K., P604  
 Hamm, C., 282, P642, P1311, P1406, P1624, 1961, P3019, P3214, P3325, P3371, P4715, 4993, P5264  
 Hamm, C.W., P843, 1257, P1364, P1545, P2206, P4736, P5312, P5464  
 Hamm, K., P3290  
 Hammami, A., P4121  
 Hammami, R., P2353  
 Hammer, A., P4210  
 Hammerman, H., 338, 1145, P2996, P5689  
 Hammond, J.L., P1416  
 Hammoud, M., P3166  
 Hammoudeh, A., P5253  
 Hammoudi, N., P511  
 Hammwoehner, M., P4186  
 Hamodraka, E., P4900  
 Hampton, D.R., P3047  
 Hamren, B., P4851  
 Hamwi, A., P4741  
 Hamza, H., P2374



- Han, B., P2371, P5572, P5583  
 Han, C.D., P2142  
 Han, J., P4095  
 Han, S.H., P1515, P4535, P5400  
 Hana Vaknin-Assa, H.V.A., P1550  
 Hanafusa, T., P3819  
 Hanasen, B.H., P3155  
 Hanash, J.A., P3155  
 Hancock, J., P4796  
 Handanis, S., P2962  
 Handke, M., P740  
 Handler, C., P1575  
 Handschin, R., P3356  
 Handschumacher, M.D., P2395  
 Hanhoun, M., P5373  
 Hanke, M., 5082  
 Hankey, G., P4198  
 Hannah, A., P804  
 Hannes, T., P3066  
 Hanon, O., P1442, P5467  
 Hansegaard, J., P498  
 Hansel, B., P5444  
 Hansen, H., P3395  
 Hansen, J.F., P1681, P3155  
 Hansen, K.N., P650, P4720  
 Hansen, M.L., 1821, P2290, P3130  
 Hansen, P.R., P1439, P1556, P2299, P4684, 5206  
 Hansen, P.S., P1639  
 Hansen, T.M., P5290  
 Hansen, T.W., P5455  
 Hanson, M., P2254  
 Hanson, S., P4603  
 Hanssen, H., P2213, P4541  
 Hanssen, M., P2967, P4729  
 Hanssen, T.A., 128  
 Hansson, G.K., P4590, P4608  
 Haouala, H., P4042  
 Hara, H., 2825  
 Hara, T., P3010  
 Harada, A., P480  
 Harada, K., P1359, P1361  
 Harada, M., P402  
 Hararis, G., P1443, P4266, P4682  
 Harary, T., P5401  
 Harassis, A., P5253  
 Harb, S., P4032  
 Harbinson, M., P5609  
 Harder, Y., 1156  
 Harders, G.E., P1424, P1425, 3774  
 Hardy, I., 2820  
 Hare, D., 5014  
 Hare, J., P4924  
 Hare, J.L., P4908  
 Harel, N., P649  
 Harigaya, H., P3010  
 Harjola, V.-P., 2764  
 Harjola, V.P., 5075  
 Harkins, C., P5523  
 Harkonen, U., 3773  
 Harks, E., P1629  
 Harmer, J.A., P3986  
 Harpf, H., 4969  
 Harridge, S.D.R., P1681  
 Harrington, J.L., P812  
 Harrington, R., P4688  
 Harris, E., P3942  
 Harrison, J.K., P745, P1580, P3132  
 Hart, G., P576, P1532  
 Hart, S.A., 147, P745, P1580, P3132, P4815, 5175  
 Hartford, M., P1480  
 Hartmann, A., 239, 5058  
 Hartmann, E., P5402  
 Hartmann, G., P5402  
 Hartmann, M., P405  
 Hartog, J.W.L., P4918  
 Haruki, N., P2181, 5092  
 Haruna, T., P4517  
 Haruta, S., P693  
 Harvey, P.R., P1734  
 Harvey, R.P., P526  
 Harwardt, M., P2106  
 Hasan, A., P5604  
 Hascouet, S., P506  
 Hasdai, D., 5205  
 Hasegawa, D., P668, P690  
 Hasegawa, K., P2487  
 Hasenfuss, G., 291, P706, 903, P1415, P2428, P4497, P4639  
 Hashida, H., P4062  
 Hashimura, K., 3640  
 Hashimura, Y., 1024, P4011  
 Hasic, A., P1410  
 Hasin, Y., 1148, 1958, P3845, P3851, P5271, P5274  
 Haslam, T., P2451  
 Hasman, A., P587  
 Hassager, C., P3282, P4122, P4795, P4797  
 Hassan, H., 2863  
 Hassell, K.L., P1602  
 Hassine, M., P1326, P2991, P4042  
 Hastie, C.E., P4665  
 Hatakeyama, Y., 3659  
 Hatala, R., P4872  
 Hatam, N., P807, 5064  
 Hatanano, T., P4573  
 Hatano, T., 400  
 Hatle, H., 4970  
 Hattangadi, N., P1516  
 Hattori, K., P3010, P4067  
 Hatziliadou, D., P829  
 Hatzinikolaou-Kotsakou, E., P5637  
 Hatzis, G., P524, P536, P1287, P2109, P3917, P3929, 4998, P5550  
 Haubner, B.J., P1390, P1391, P1401, P1402  
 Hauck, P., P4882  
 Haude, M., P643, P4136, P4137  
 Hauer, R.N., P2140, P3265  
 Hauff, P., P4584  
 Haugaa, K.H., 1116, P3306, P5366  
 Haugaard, S.B., P5455  
 Haugen, E., P4237  
 Hauner, H., P4637  
 Haunsoe, S., P775  
 Hauptmann, K., P671, 3653  
 Hauptmann, K.E., P1277, P2096, P2990, P3180, P5503, P5508, P5509  
 Hauptmann, T., P1321  
 Hauroeder, B., P2408  
 Hausauer, A., P5369  
 Hausenloy, D.J., P1383, 3647  
 Hauser, K.H., P5448  
 Hauser, R., 1913  
 Hauser, R.G., P1651, P1655  
 Hausleiter, J., 1260, P3035  
 Hausmann, R., P467  
 Hausmanowa-Petrusewicz, I., P1562  
 Haverkamp, W., P2444  
 Haverslag, R.T., 2911  
 Havndrup, O., P3282  
 Havranek, V.H., P709  
 Havulinna, A.S., 984  
 Hawkins, N.M., P2515  
 Hawkins, P.N., 5057  
 Haworth, P.A.J., P4643  
 Haworth, S.G., 5176  
 Hawranek, M., P474, P5288, P5293, P5307, P5309  
 Hawthorne, M., P3062  
 Hayakawa, T., P5683  
 Hayami, N., P3303  
 Hayashi, H., P530, P3220  
 Hayashi, M., P1361  
 Hayashi, T., 5110, 5129, P5628  
 Hayashida, A., P1537, P2405, P3869, 4986  
 Hayashida, K., P3183  
 Hayen, A., P3022  
 Hayes, D.L., P1655  
 Hayward, C., P5639  
 Hazarapetyan, L.G., 5103  
 Hazeekamp, M.G., P4141, P4791  
 Hazirolan, T., P1353  
 He, B., P1407  
 Head, C., P4796  
 Headon, A., P848  
 Heagerty, A.M., P3110  
 Healey, J.S., 1914, P2447, P4847  
 Heatlie, G., 166, P1714, P3346, P4891, P4901  
 Hecht Olsen, M., P866, 1015  
 Heck, P.M., P4506  
 Heckmann, D., 1113  
 Hedblad, B., 167, P4838  
 Hedin, U., P4608  
 Hedman, M., P2203, P3388, P5389, P5391  
 Heeger, C., 380  
 Heeley, E., 1018  
 Hees, H., 2768  
 Heeschen, C., P5464  
 Heestermans, A.A.C.M., P1311, P5264  
 Heestermans, T., P5312  
 Heethaar, R.M., P5632  
 Hegab, Z., P3384  
 Heger, J., P1404, P3394  
 Heidarsdottir, R., P3338  
 Heidbreder, M., P3375  
 Heidbuchel, H., P4695, 4974  
 Heidecke, H., P1524  
 Heiermann, N., P2188  
 Heigert, M., P4032  
 Heilmeyer, P., P588  
 Heim, A., P3287  
 Hein, F., 1260, P3035  
 Hein, L., P1690, 5055  
 Heine, G.H., P4631  
 Heinemann, L., P2997  
 Heinke, A., 1113  
 Heinrich, K., 387  
 Heintze, J., P3284, P4820  
 Heinz, G., 285, P717, P3820, P3837  
 Heinz, P., P5369  
 Heinzl, F.R., P562  
 Heinzl, H., P1613  
 Heise, A., P4878  
 Hekimian, G., P2413  
 Helbing, W.A., P1381, 5171  
 Held, C., P589  
 Helfenstein, T., P4610  
 Helft, G., P4716  
 Helle-Valle, T., P3030  
 Hellemans, I.M., P587  
 Hellenius, M., P4658  
 Heller, K., P4637  
 Hellige, G., P2100, P3797, P5256  
 Hellings, W.E., 893  
 Helluy, X., P3025  
 Helmer, C., P624  
 Helqvist, S., P3226, P3282  
 Helse, S., P5565  
 Helvacioğlu, F., P4635  
 Hemetsberger, R., P3791, P5405  
 Hemingway, H., 2671, P3844  
 Henandez-Martin, E., P3129  
 Henein, M.Y., P503, P2176  
 Heng, B.H., 2645  
 Hengstenberg, C., 1108, P4689  
 Henkelmann, N., 3772, P4780  
 Henkens, I.R., P721  
 Henkens, S., 1110  
 Henneberg, E.W., P5531  
 Hennerbichler, D., 5241  
 Hennemersdorf, M., P4735  
 Hennig, J., 161  
 Hennigan, B., P2537  
 Henning, A., P4885  
 Heno, P., P5582  
 Henriksson, K., P5428  
 Henriksson, K.M., 149, P5429, P5497  
 Henriksson, P., P589, P3121  
 Henriques, C., 1107  
 Henriques, J.P.S., P2938, 3569  
 Henriques-Coelho, T., P741  
 Henriquez, O., P1724  
 Henry, P., P3813, 4991, P5301  
 Hense, H.-W., P4656  
 Hense, H.W., P3976, 5082  
 Hentati, M., P2353, P4121  
 Hentia, C., P1395  
 Heppell, R., P678  
 Heppell, S., 5007  
 Heras, M., P435, P438, P1275, P1559, P2983  
 Herbots, L., P1607  
 Herda, L.R., P4248  
 Herdeg, C., P695, 2680  
 Herder, C., 132, P4669

- Herijgers, P., P1416, P5330  
 Hering, D., P1268, P3284, P4545, P4909  
 Herlitz, J., P1480, P2979  
 Herman, A.G., 905, 1256  
 Herman, D., P791, P2446  
 Herman, J.P., P4137  
 Herman, R.H., P3141  
 Hermanides, R., P5312  
 Hermanides, R.S., P1311, P3213, P3214  
 Hermann, S., P3796  
 Hermann, T.H., P3962  
 Hermans, H., P5330  
 Hermida, J., 1953  
 Hermida, J.-S., P1628  
 Hermida, J.S., P3336  
 Hermida-Prieto, M., P3253  
 Hernandez, A., P5616  
 Hernandez, C., P3185  
 Hernandez, E., P4718, 5198, 5199, 5245  
 Hernandez, F., P2357, 2926  
 Hernandez, J., P1654, P3297, P4196  
 Hernandez, R., P435, P1543, P4737  
 Hernandez Antolin, R., P4734  
 Hernandez Garcia, J.M., P2481, P4734  
 Hernandez Luis, C., P3051  
 Hernandez-Antolin, R., P1316, 4958  
 Hernandez-Baldomero, I.F., P4912  
 Hernandez-Romero, D., P1318, P3266  
 Hernando, V., P1387  
 Hero, M., P803  
 Herod, P., 3642  
 Herold, J., P548  
 Herpers, R., 1246  
 Herregods, M.-C., P5330  
 Herrera, D., P491, P492, P2304, P2397, P3039, P4183, P5329  
 Herrera, J., 343  
 Herreros, J., P850  
 Herrman, J.-P., P4136  
 Herrmann, H., P3373, P3396  
 Herrmann, J., 1128  
 Herrmann, R., P5655  
 Herrmann, S., P2159, P3897, P5359  
 Herrmann, S.H., 2861, P4105  
 Herrmann-Lingen, C., P2428  
 Hersemeyer, K., P544  
 Hertel, G., P2213, P4541  
 Herz, J., P4595, P4605  
 Herzog, B., P2078, P4562  
 Herzog, B.A., 396, 399, P3033  
 Herzog, W., P676  
 Hescheler, J., P3066, P3072  
 Hess, J., P4778, P4798, P4800  
 Hess, K.A., P2102, P2104  
 Hesse, B., 2816  
 Hessling, G., P4845, 5100  
 Hetherington, S.L., P5284  
 Hetterich, H., P1540  
 Hettich, I., P4126  
 Hetzel, S., 5041  
 Hetzer, R., P489, 1004, 1005, 1208, P1524, P1525, P1533, P1581, P1685, P4133, P4762, P4809, P4812  
 Heusch, G., 2016  
 Heying, R., P4810  
 Heyndrickx, G., P1334  
 Heyndrickx, G.R., P4752  
 Heyse, A., P4752  
 Hiasa, G., P4062  
 Hiasa, Y., P471, P2119, P5302  
 Hibino, T., P445, 1013, P3057, P3997, P4014  
 Hida, S., 400, P4573, P4747  
 Hideg, K., P1418  
 Hiemann, N.E., P1524, P1525, P1533, P4762  
 Higaki, J., P4062  
 Higashi, Y., P2216, P3416, P5541  
 Higgins, M., 123  
 Higuchi, M.L., P1671, P4498  
 Higushi, L., P5720  
 Hilberg, T., 4972  
 Hilbert, S., P4187, P4871  
 Hildebrand, L., P2956  
 Hildebrandt, P., P5663, P5673  
 Hildebrandt, P.R., P5455  
 Hildick-Smith, D., P2115, P4643  
 Hilfiker-Kleiner, D., 341, 2769, P3372, 5225  
 Hill, M.D., P3141  
 Hill, S., P1282  
 Hillege, H., P3154  
 Hillege, H.L., P846, P3359, P4212, P5466  
 Hillenbrand, H.H., P3897  
 Hiller, K.-H., P3025  
 Hiller, K.H., P768, P3026  
 Hillis, G.S., P804, P3911  
 Hilpert, P., P843, P3290  
 Hiilti, P., P3356  
 Himbert, D., P4099, P4131, 5155  
 Himi, T., P693  
 Hindricks, G., P764, P766, P2461, P4187, P4825, P4854, P4871, P4872  
 Hinz, R., 390  
 Hirai, T., P1288  
 Hirano, K., P3197  
 Hirashiki, A., 1127, P1361, P4250  
 Hirata, K., P469, 900, P1278, P1304, P1517, 3561, 3563, 3566, P5605, P5650  
 Hirata, K.H., P4467, P4472  
 Hirata, Y., P5248  
 Hirayama, A., P4060, P4630, P4862  
 Hiro, T., P4067  
 Hiroe, M., 5000  
 Hirohata, A., P3934, P4520  
 Hirohata, S., P3934, P4934, 5005  
 Hirokawa, Y., P4583  
 Hirono, A., P4038  
 Hirooka, K., P413  
 Hirose, E., P4520  
 Hirose, K., 400, P4573  
 Hirsch, A., P1303, P3098, P3101  
 Hirschberg, K., P545, P2324  
 Hisamatsu, K., P1514  
 Hisdal, J., P4694  
 Hita, A., P3926  
 Hitschold, T., P1704  
 Hittinger, L., P4214, P4251, P4894  
 Hiyamuta, K., P3932  
 Hiyoshi, E., P652, P656  
 Hjalmarsen, A., P4205, P5679, P5685, P5701  
 Hjelm, S., P2459  
 Hjelmesaeth, J., P2281  
 Hjerdahl, P., P4173  
 Hjerrild, B.E., P4816  
 Hlawaty, M., 2005, 2009, P3881, P4818, P5559, P5562  
 Hlidebrand, L., P1343  
 Hlivak, P., 5107  
 Ho, G.H., P5440  
 Ho, J., 1250, P1335, P1336  
 Ho, K.L., P833, P5427  
 Ho, K.T., 2645  
 Ho, S., 1250, P1335, P1336  
 Ho, Y.L., P4860  
 Hoang, N., P3316  
 Hoch, M., P3372, 5225  
 Hochadel, M., P434, 1148, P1277, P2096, P2990, P3180, P3836, P3839, P3845, P4704, P4721, P4736, 4994, 5151, P5270, P5274, P5280, P5503, P5508, P5509  
 Hochholzer, W., 4985, 5116  
 Hochman, J.S., P3853  
 Hocini, M., P1629, 3657, P4828, 5097  
 Hod, H., P1362  
 Hodge, D., 5060  
 Hodge, J., P2490  
 Hodge, S.A., P2994  
 Hodson, M., P503  
 Hoehltl, T., 5108  
 Hoehltl, T.H., P709  
 Hoedemaekers, Y.M., 1210, P3243, P3247, P4147  
 Hoedl, R., P5324  
 Hoefler, D., P2333, P2335  
 Hoefler, I., P5404  
 Hoefler, I.E., 1246, 2017, 2911, P3104, P3105, P3107, P4488, 5227, P5387  
 Hoefler, P., P2158  
 Hoefler, S., 4969  
 Hoefsten, D.E., P2171  
 Hoehner, M., P4200, P5569  
 Hoeks, S.E., 156, 157, 887, 1009, P1445, P1706, P2170, P2243, P2338, P2341, P2509, P2966, P3122, P3159, P3978, P3987, P4633, 4947, 5061, P5252, P5485, P5513, P5524, P5525, P5526  
 Hoellriegel, R., P2480, P2944, P2951, 3528, 4959, 4963, 4966  
 Hoelschermann, H., P463, 889  
 Hoendermis, E.S., P1573  
 Hoerlyck, A., P4816  
 Hoerstrup, S., P2077  
 Hoerstrup, S.P., P4609  
 Hoes, A.W., P4887  
 Hoevenaer-Blom, M.P., P3113  
 Hofbeck, M., P4780  
 Hofer, M., P4238, P4884  
 Hoff, L., 292  
 Hoffman, P., 2043, 2766, P4139  
 Hoffmann, A., P669, P2425  
 Hoffmann, E., P1634  
 Hoffmann, M., P4637, P5653  
 Hoffmann, P., P2122, P3877, 5154  
 Hoffmann, R., P2125, P3882, P4134, 5157  
 Hoffmann, S., P2115  
 Hoffmann, U., P3013, P4870  
 Hofman, N., P4156  
 Hofmann, A., 1247  
 Hofstra, L., P3012, P5468, P5469  
 Hogarth, A.J., P2526  
 Hohnloser, S.H., 2779  
 Hohnloser, S.J., 2781  
 Hollund-Carlson, P.F., P3040  
 Hojo, Y., P3989  
 Hoke, N.H., P2124  
 Hoke, N.N., 1154, P3367  
 Hoke, U., P721  
 Hol, P.K., P3865  
 Holden, A., P582  
 Hole, T., P4230  
 Holemans, P., P4639  
 Holland, D.J., 2053, P4881  
 Holland, P., P2104  
 Holland, R., P1693  
 Holland-Letz, T., P1530  
 Holloway, R., P2434  
 Holm, F., P3200  
 Holm, H., 3776  
 Holm, N., P3947  
 Holman, E.R., P2156, P3300, P3866, P3873, P3876, 5088, 5125, P5272  
 Holmberg, S., P4643  
 Holme, I., P2245, 5163  
 Holmes, D.R., 3653  
 Holst, A.G., P775  
 Holstenson, E., P1498  
 Holt, C.M., P3062  
 Holt, M.P., P661  
 Holte, H., P4634  
 Holub, J., P5494  
 Holy, E., 387  
 Holy, E.W., P2107, P3947, P4593  
 Holzmann, J., P2444  
 Holzmeister, J., P5604  
 Hombach, V., P416, 1255, P1345, P1376, P5369  
 Hommel, E., 1826, P3170  
 Hommel, S., 5099  
 Homolova, S., P3240, P3283  
 Hong, G.R., P2172, P5354  
 Hong, K., P856, P858  
 Hong, M.-K., P3198  
 Hong, P.S.G., 248, 250  
 Hong, S.N., P2982  
 Hong, T.J., P420, P2992, P4533, P4676, P5370, P5415  
 Hong, Y.J., P2436, 3560, P4152, 4988  
 Hong, Y.J.H., 1111  
 Hongo, R., P770, 3652  
 Honisz, G., 1147, P2133  
 Honjo, H., P402  
 Honkola, J., P4153  
 Hoole, S.P., P4506  
 Hooper, J., P831  
 Hooper, W.C., P3850  
 Hoorntje, J.C.A., P3213, P5291

- Hope, S.A., 1261  
 Hopp, E., 5224  
 Hoppe, S.T., P4269  
 Hoppe, U., 2016, P4137  
 Hoppe, U.C., P4136  
 Hoppener, M.R., P3123  
 Hoppmann, P., P472, P539, P670, 3771  
 Horak, D., 3649, P3879  
 Hordern, M.D., P4908  
 Horellou, M.H., 1954  
 Horie, M., P814, 2676, P4262  
 Horie, T., P532  
 Horinaka, S., 2825  
 Horio, Y., P2476  
 Horjeti, B., P2976  
 Horowitz, J.D., P2233  
 Horrevoets, A.J.G., P2187  
 Horrigan, G., P3804  
 Horsfall, M., P5461  
 Horstkotte, D., P1268, P1675, P3284, P3307, P4226, P4545, P4820, P4909, P5693  
 Horton, R., P770, P1620, P2448, 3652  
 Horvath, I., P2211  
 Horvath, I.G., P1317, P5283  
 Horvilleur, J., P1648  
 Hoshiga, M., P3819  
 Hosogi, S., P668, P690, P691, P4038  
 Hosokawa, S., P471, P2119, P5302  
 Hosseinkhani, H., 1245  
 Hotta, H., 5141  
 Hou, J., P1570  
 Hou, X., P3308  
 Houben, R., 2762  
 Houde, C., P2379  
 Houe, N., P1283, P1284  
 Houghtaling, P., 397, P5349  
 Houle, H., P4787  
 Hounslow, N., P4624, P5413  
 Houtman, M.J., P3312  
 Hovanesyan, A., P1588  
 Hove-Madsen, L., P564, P578, 1240  
 Hovinen, M.H., P2275  
 How, O.J., P3884  
 Howard, J., P1576  
 Howard, L.S.G.E., P739, P748, 5167  
 Howlett, J., P1720  
 Hoydal, M., P3391, P3395, 5053  
 Hoyer, D., P561, P1447  
 Hoymans, V., 4960, 4965  
 Hristov, M., P2215  
 Hristova, K., P483, P485, P708  
 Hrycek, E., P3089  
 Hryniewiecki, T., P4125  
 Hryniewicz, A., P707, P747  
 Hsu, H.C., P3390  
 Hsu, J.H., P1403  
 Hsu, L.F., P833, P5427  
 Hsueh, W., P4587  
 Hsueh, W.A., 902  
 Htun, P., P5311  
 Hu, D., P4675  
 Hu, D.Y., P3148  
 Hu, L., 1244  
 Hu, S.-J., P3963  
 Hua, X., P4658  
 Huang, C., P696, P1735  
 Huang, C.-Y., P5594  
 Huang, D., P1534  
 Huang, J., P1365  
 Huang, P.H., P4529  
 Huang, S., 398  
 Huang, S.C., P703, P3149  
 Huang, S.K., P3149  
 Huang, Y.-Y., P3883  
 Huber, B., P3082  
 Huber, B.C., 2912  
 Huber, K., P675, P3004, P4039, 5108, P5275, P5376  
 Huber, K.H., P709  
 Huber, M., P4261, P5724  
 Huber, S., P3347, P3825  
 Huby, J.P., P5467  
 Hucko, T., P4584  
 Huczek, Z., P1328, P5315  
 Hudzik, B., P749, 5240, P5278, P5293  
 Hueb, A., P2069, P2071, P2318, 5189  
 Hueb, W., P534, P538  
 Hueb, W.A., P458, P2069, P2071, P2318, P3158, 5189, 5191, 5238, P5480  
 Huebler, M., P4812  
 Huebner, N., P5339  
 Huelsmann, M., 285, P828, 1901, P3820, P3837, P4216, P4224  
 Huenig, T., P1569  
 Huez, S., P727, P1587  
 Hughes, E.A., P5532  
 Hugues, T., P743, P769  
 Huh, J.K., P3411  
 Hui, J.C.K., P4519  
 Hui, R., 152, P2258  
 Hui, R.T., P1730  
 Huijgen, R., P2244  
 Huikuri, H.V., P4153  
 Huisman, M.V., P700  
 Hulot, J.S., P1333, 5200  
 Hulte, J., 1100  
 Hummel, A., 2674  
 Hummel, Y.M., P4913, P4918  
 Humphries, S., P3928  
 Hung-Fat Tse, H.F., P4672  
 Hunger-Dathe, W., P2997  
 Hunjan, M., P582  
 Hunt, J., 248, 250  
 Hunter, R., P2450  
 Huntley, B.K., P1424, P1425, 3774  
 Huntscha, S., P569, 3781  
 Hunzelmann, N., P1594  
 Huppertz, A., P3027  
 Hur, S.H., P420, P2142, P3216, P4184, P4533, P4676, P5370, P5415  
 Hurks, R., P3104, P3105, P3107, P5387  
 Hurler, M.A., P1422, 2920  
 Hurme, R., P5414  
 Hurtado, J.A., P657, P1318, P4858  
 Husberg, C., P824, P1674  
 Husby, P., P3811  
 Husmann, L., 396, 399, P2078, P3033, P4562  
 Husnain, K.H.H., P5388  
 Hussain, I., P455, P1531, P3953  
 Hussain, M., P576  
 Hussein, K.H., P798  
 Hussein, M., P2447  
 Husser, D., P764, P4187, P4871  
 Husser, O., P430, 3567, 5112  
 Hutchaleelaha, A., 2678  
 Hutter, A., P4126  
 Hutter, J.A., P3793  
 Hutter, R., P2113, P3377  
 Huttin, O., P508, P4083  
 Hutuleac, R., P4210  
 Hutyra, M., 3649, P3879  
 Huusko, J., P2203  
 Huusko, J.M., P5389  
 Huysmans, C., P4639  
 Huzeir, V., P2243  
 Huzen, J., 2765  
 Hvas, A.M., P1322  
 Hvass, U., P2413  
 Hvelplund, A., P2114, P2117, P2942  
 Hwang, J.W., P1553  
 Hynes, B., P783, 5137, P5265  
 Hytonen, J., P2192, P5391  
 Iaccarino, D., P3994, P4003  
 Iaccarino, G., 1019, P2191, 2917, P4890  
 Iacomino, M., P3248  
 Iacono, C., P2370  
 Iacopino, S., P794  
 Iacoviello, M., 3778, P4215, P4247  
 Iacovoni, A., 1001  
 Iacuzio, L., P852  
 Iagaru, N., P4271  
 Iakobishvili, Z., 5205  
 Iamele, M., P2354  
 Iancu, M., 1999, P4817  
 Ianhez, L.E., P2957  
 Iani, C., P2354  
 Iannelli, G., P5517  
 Iannino, T., P2978  
 Ibanez, B., 892, P2113, P3112, P3377, P5407  
 Ibanez, M.A., 377  
 Ibn El Hadj, Z., P2067  
 Ibrahim, A., P710, P1540  
 Ibrahim, M., 1241  
 Ibrahim, R., P2131, P2377  
 Ibsen, H., P866, 1015, P3800  
 Ichida, M., P3989  
 Ichikawa, K., P3352  
 Ichikawa, S., P437, 5089  
 Ichikawa, Y., P1348, P4547, P4876  
 Ichimori, H., P626  
 Ichinose, A., P4569  
 Iddon, P., 245  
 Ideker, R.E., P1647  
 Idrizi, R., P1689  
 Ielasi, A., P1544, P3201, 5197  
 Iemura, M., 2007, P2362  
 Iervasi, A., P4932  
 Iervasi, A.L., 2767  
 Iervasi, G., 1106, P3833  
 Iesaka, Y., P759  
 Iesu, S., P5487  
 Ieva, R., P2150  
 Ifrim, S., P3995  
 Igal Teplitsky, I.T., P1550  
 Igarashi, M., P1625, 1923, P3301, P4862, P5652  
 Igarashi, Y., 400, P4573, P4747  
 Iglesias, A., P4685, 5121  
 Iglesias, D., 289  
 Iglesias, M.J., P1399  
 Iglesias Garriz, I., P1378  
 Ignaszewski, A., P1720, P4002  
 Igoumenidis, N.E., P1547  
 Igual Perez, F., P470  
 Ihara, S.S., P4610  
 Ihlemann, N.I., P3962  
 Iida, K., P4630  
 Iijima, K., P2248  
 Iijima, R., 2929, P2995  
 Iimori, A., 5229  
 Iino, K., P4127  
 Ikeda, A., P437, P4138  
 Ikeda, J., P3932  
 Ikeda, S., 1146, P1452, P4012, P5318  
 Ikeda, T., P2487  
 Ikejima, H., P469, P1304, P4052  
 Ikemoto, M., P4237  
 Ikeno, F., 4953  
 Ikewaki, K., 1021, P5479  
 Ikonomidis, I., P2169, P2220, P2241, P2540, P3106, P3822, P4926, 5144, P5348, P5502, P5688  
 Ilija, R., P2086, P3194, P3941  
 Iliadis, S., P3936  
 Ilic, S., P619  
 Iliceto, S., P584, 1003, 1115, P1371, P2330, P3173, P3250, P3261, P4761, 5234, P5579  
 Ilich, I., 246, P786  
 Iliodromitis, E., 5144  
 Iliodromitis, E.K., P1383, P1484, P2492, P5535  
 Iliopoulos, D., P2321  
 Iliopoulos, D.C., P5490  
 Iliuta, L., 5042, 5242  
 Illario, M., 1019  
 Illyes, M., P2211  
 Ilsar, R., P726  
 Imai, H., P1560  
 Imai, K., P1537, 4986  
 Imai, M., P668  
 Imai, Y., P1391, P4520  
 Imamura, K., 5129, P5628, P5650  
 Imanishi, T., P469, 900, P1278, P1304, 3561, 3566, P4052, P4467, P4472  
 Imazio, M., P4116, P5571  
 Imholz, B.P.M., P2244  
 Imperiale, D., P853  
 Inaba, S., P4062  
 Inagaki, M., P437  
 Inamura, N., P1386  
 Inanc, M.T., P1536  
 Inanc, T., P2533, P3362  
 Inaraja, V., P2272

- Incarbone, A., P1501  
 Ince, H., P547  
 Indiveri, F., P4516, P4616  
 Indolfi, C., 904, P3060  
 Indridason, O.S., P3338  
 Infantes, C., P5492  
 Infantino, V.A., P4057  
 Infusino, F., P2226, P4578  
 Inglis, S.C., 150, P5523  
 Ingul, C., P3395  
 Ingul, C.B., 2049, P3802, 4970, P5707  
 Iniguez, A., P595  
 Iniguez-Romo, A., P4054  
 Innasimuthu, A.L., P4103  
 Inoko, M., P4517  
 Inomata, T., P1560  
 Inoue, H., P3188, P3932  
 Inoue, K., 284, P826  
 Inoue, N., P2385, P4477, P5372  
 Inserte, J., P1387  
 Insulander, P., P1637  
 Insull Jr, W., P2246  
 Intzilakis, T., P1289  
 Inuzuka, R., P2386, P4765, P4803, 5180  
 Inzitari, D., P5499  
 Ioakeimidis, N., 162, P453, P466, P473, P638, P1292, P1529, P2209, P2531, P2532, P3405, 3536, P3915, P3919, P3922, P3937, P3973, P4265, P4686, P4936, P5346, P5533, P5550, P5721  
 Ioannidis, A., P5662  
 Ioannidis, K., P2492  
 Ionac, A., 2052  
 Ionescu, D.-D., P1377, P2219  
 Ionita, G.M., 381  
 Iop, L., P5561  
 Iorgulescu, C., P5644  
 Iori, M., P5695  
 Iorio, M., P5512, P5514  
 Iorio, S., P1542  
 Iosseliani, D., P679, 2826  
 Iqbal, A., P3793  
 Iqbal, J., P4597  
 Iriart, X., P4787  
 Iribarren, C., P4167  
 Iribe, G., P408  
 Irigoyen, M.C., P2484, 4961  
 Irimpen, A., P1656, 1909  
 Irlbeck, T., P3013  
 Isaac, D., P2523  
 Isaacs, A., 1799, 4995  
 Isaaz, K., P5620  
 Isamat, R., P2369  
 Isaza, D., 5245  
 Ischinger, T., P5503, P5508, P5509  
 Ishac, R., 5121  
 Ishibashi, H., 3566  
 Ishibashi, K., 900, P1278, P5318  
 Ishibashi, T., P4477, P5372  
 Ishibashi, Y., P4756  
 Ishida, H., P626  
 Ishida, K.I., P3812  
 Ishida, M., P1348, P3275, P4559, P4876  
 Ishida, N., P4559  
 Ishida, S., P633  
 Ishida, T., P3416  
 Ishiguro, Y.S., P402  
 Ishihara, T., P3819  
 Ishihara, Y., P3899, P4071  
 Ishii, H., P1361, 2007, P2362  
 Ishii, K., P3871  
 Ishii, M., P3818  
 Ishikawa, M., P3010  
 Ishikawa, S., P1388, 5141  
 Ishimori, H., P3197  
 Ishio, N., P1503  
 Ishizaka, A., P5486  
 Ishizu, T., P838, P1582, P2251, P3036, P3908, P5649, P5652  
 Isidoro Tavares, N., P556  
 Isik, T., P3195  
 Isikova, K., P5715  
 Islegen, C., P4701  
 Ismail, T.F., 2934  
 Ismail, Y., P5253  
 Isnard, R., P1469, 2918, P3351  
 Iso, Y., P2196  
 Issa, S.M., P5526  
 Issa, V.S., P5699  
 Isshiki, T., P652, P656  
 Itai, K., P5437  
 Itescu, S., P3085  
 Ito, M., P3275, P3352, P4547, P4559, P4876  
 Ito, S., 284, P3374  
 Ito, T., P688, P1366  
 Ito, W.D., P2197  
 Ito, Y., P3197  
 Itoh, S., 2007, P2362, P4476  
 Itoh, T., 2817  
 Iudicello, R., P4473  
 Iung, B., P2413, P4099, P4131, 5155  
 Ius, P., P2409  
 Ivandic, B., P3256  
 Ivanov, A., P2988  
 Ivanov, V., P1409  
 Iversen, A., P1556, 5206  
 Iversen, K.K., 287, P1299, P4795, P4797  
 Ivorra, A., P1513  
 Ivy, D.D., P1578, 5176  
 Iwabuchi, M., P1717, 1900, 2642, P4568, P5519  
 Iwama, H., P4078  
 Iwamoto, T., P1367, P3015  
 Iwanaga, Y., P532, 5110  
 Iwasa, M., P2478, P4572  
 Iwasaka, T., P2127  
 Iwase, T., P1558, P4538, 4957  
 Iwata, H., P3867, P5248  
 Iwata, S., 5129, P5628  
 Iwata, Y., P1503  
 Iyer, K.S., P4811  
 Iyer, P., P4811  
 Izar, M.C., P3939, P4610  
 Izawa, H., 1127, P4250  
 Izraiq, M., P5253  
 Izumi, N., P5318  
 Izumi, T., P554, P1560, 3659  
 Izumo, M., P612, P4756, P5334  
 Izzo, A., P2094  
 Jaarsma, T., P846, 2765, P3154, P4212  
 Jabara, R., P4603  
 Jaber, W.A., 397, P5349  
 Jackson, C.E., 241, P820, P4220, 5081  
 Jackson, J., 3654, P4856  
 Jackson, R., P3145  
 Jacob, S., 4964  
 Jacobs, S., P2068  
 Jacobshagen, C., 291, P4497  
 Jaconi, M.E., P3087  
 Jacqueminet, S., P1469  
 Jacquier, A., P1346, P3032  
 Jadidi, A., 3657, P4828, 5097  
 Jaeger, S., 1242  
 Jaeggi, E.T., P5554  
 Jaffe, A.S., P1298  
 Jagathesan, R., P4513  
 Jagic, N., P2115  
 Jagoda, P., P3083  
 Jaguszewski, M., P4515  
 Jahagirdar, R., P5422  
 Jahangiri, M., P2070, P2072  
 Jahnke, C., P3027  
 Jahnke, T., P4127  
 Jahns, R., P417, P1569, P4245, P4882, 5231  
 Jain, P., P496, P5482  
 Jain, S., P2217  
 Jais, P., P1629, P3336, 3657, P4158, P4828, 5097  
 Jais, X., P1574, 5176  
 Jaisser, F., P3249, P3288  
 Jakala, J., 4955  
 Jakka, N., P2515  
 Jakob, A., P1541  
 Jakob, M., P4524  
 Jakob, P.M., P768, P3025, P3026  
 Jakovljevic, B., P4199  
 Jakovljevic, D., P2334, P3048  
 Jakovljevic, D.J., P2336  
 Jakowitsch, J., P715, P724  
 Jakubowski, J.A., P1310  
 Jalkanen, S., P4591  
 Jamart, J., P3228  
 Lambert, H., 5149  
 James, M., 5221  
 James, M.A., P2434  
 James, R., P4643  
 James, R.W., P3398  
 James, S., 286, P3135, P3144  
 Jan, V., P2074  
 Janas, J., P609, P1420  
 Janata, K.J., P709  
 Jander, N., P2406  
 Jander, S., P5653  
 Janerot Sjoberg, B., 2821  
 Jang, I., P5310  
 Jang, J.S., P1472  
 Jang, S.Y., P2289  
 Jang, Y., P1511  
 Jang, Y.S., P4066  
 Jang-Ho Bae, J.H., P4048  
 Janicke, I., P5503, P5508, P5509  
 Janin, S., P3325  
 Janin-Manificat, L., P3859  
 Janion, M., P3179, P5279  
 Janko, S., P643  
 Jankowska, E.A., P4209, P4893, 5059  
 Jankowski, K., P707  
 Jankowski, P., 163, P872, P2269  
 Jannowitz, C., P5408  
 Janoumis, L., P2282  
 Janousek, J., P3050  
 Janousek, S., P425, P3081  
 Jansa, P., P720  
 Janse, P., P4821  
 Jansen, J.A., P2421  
 Jansen, W.P.J., P4823  
 Janssen, C., P1437  
 Janssens, S., 5226  
 Jansson, J.H., P4661  
 Jantzen, T., P3313  
 Janus, M., P3196  
 Januszewicz, A., P5542  
 Januszewicz, M., P5542  
 Januzzi, J., P5673  
 Januzzi, J.L., 148, P5501  
 Jany, B., P417, P4245  
 Jaquet, K., P2120  
 Jarai, R., P675, P4039, 5108, P5275  
 Jarai, R.J., P709  
 Jarai, Z., P3115  
 Jardin, F., 5074  
 Jarverud, K., P2459  
 Jasaityte, R., P1685  
 Jaschke, W., P1347  
 Jassal, D., P494  
 Jassal, D.S., P2994  
 Jaster, M., P1523  
 Jastrzebski, D., P749  
 Jastrzebski, M., P477  
 Jaszewski, R., P2410  
 Jaubert, G., P5616  
 Jauhainen, M., P5565  
 Jauslin, D., 4985  
 Jaworska, K., P3853  
 Jayasinghe, A., P1588  
 Jeanpierre, E., P5564  
 Jeanrenaud, X., P3241  
 Jebara, S., P4863  
 Jebara, V., P4863  
 Jeemon, P., P5449  
 Jeffries, L., P4908  
 Jeffriess, L., P875  
 Jeffriess, L.J., P5453  
 Jeger, R., P669, P673  
 Jego, B., P1442, P5424, P5467  
 Jego, C., P5582, P5635  
 Jeilan, M., P2427, P2460, P4824, P5612, P5619  
 Jeker, U., 5084  
 Jelasic, D., P2340  
 Jelnin, V., P2348, P5258  
 Jemielity, M., P2396  
 Jenkins, C., 890  
 Jenkins, J.A., P1488, 3529

- Jenkins, N.P., P4601  
 Jenner, W.J., P4507  
 Jenni, R., P3244  
 Jenniches, M., 1012  
 Jennings, C., P582, P594, 1795  
 Jennings, C.S., P3114  
 Jennings, G., 124, 4981  
 Jenny, D., P2152  
 Jensen, C., P1337  
 Jensen, E., P4851  
 Jensen, G.B., 130, P3407, P5425  
 Jensen, J.K., 148, P5501  
 Jensen, J.S., P1556, P3407, 5206  
 Jensen, K.S., 5206  
 Jensen, L.O., P650, P3040, P4720  
 Jensen, L.T., P3800  
 Jensen, M., P3282  
 Jensen, M.T., 130, P5425  
 Jensen-Urstad, M., P1637  
 Jeon, E.S., 1096  
 Jeon, K.H., 1258  
 Jeong, J.O., P2289  
 Jeong, M.H., P420, P543, P2436, P2982, P2992, P2993, P3093, 3560, P4152, P4533, P4676, 4988, P5358, P5370, P5415  
 Jeong, M.H.J., 1111  
 Jeppesen, J., P3407, P5455  
 Jeppsson, A., 5235  
 Jerzykowska, O., P5257  
 Jessop, L., P5470  
 Jetter, H., P797  
 Jeu, A., P1628  
 Jewbali, L.S.D., P2338  
 Jhund, P., 150, P5523  
 Jhund, P.S., P2477  
 Jian, F., P3148  
 Jiang, C., P1570  
 Jiang, H.Y., 3529  
 Jiang, L., P1407  
 Jiang, L.X., P475  
 Jiang, P., P2246, P2287, P2420  
 Jimenez, M., P2983, 5147  
 Jimenez Lopez Guarch, M.C., P1572  
 Jimenez Lopez-Guarch, C., P716  
 Jimenez Navarro, M.F., P2481, P4734  
 Jimenez Quevedo, P., P4734  
 Jimenez-Borreguero, L.J., P5584  
 Jimenez-Candil, J., P1652, P1654, P2456, P2472, P3297, P4196  
 Jimenez-Navarro, M., 5128  
 Jimenez-Quevedo, P., P1316, P1543, P4737, 4958  
 Jin, E.S., 1109  
 Jin, H., P408  
 Jin, J.S.W., 5106  
 Jin, Y., 163, P542, P2371  
 Jinzaki, M., P3183  
 Jitareanu, C., P5593  
 Jo, D.K., P1526  
 Jo, S.H., P5266  
 Jo, Y., P2964, P3183, P4499, 5143, P5486  
 Jo, Y.H., P1526  
 Joachim, D., P4502  
 Joao, I., P2403  
 Job, L., P1341  
 Jodocy, D., P1350  
 Joehren, O., P3375  
 Joerg, L., P2152  
 Joergensen, C.H., P1439  
 Joergensen, E., 2816, P3282  
 Johansson, S., P5428, P5429  
 Johar, S., P767  
 Johansson, J., P5422  
 John, B., 1920, P2426, P2443, P3341, P5560  
 John, D., P4143  
 John, S., P4200  
 Johns, J., 2647  
 Johnsen, A.B., P3395  
 Johnsen, C., P5634  
 Johnsen, S.P., P4770, P4774  
 Johnson, D.M., P575  
 Johnson, E.E., P3315  
 Johnson, J.L., P4601  
 Johnston, N., 286  
 Joksimovic, Z.J., P4916  
 Jomaa, W., P2991  
 Jonas, M., 899, P4069, P4602, P4619, P4760  
 Jonasson, T.F., P3135  
 Jondeau, G., P2485, P3351, P4807, P5543, P5546  
 Joner, M., P1512  
 Jones, D., P628, P3142, P4112  
 Jones, D.G., P767  
 Jones, D.R., P5306  
 Jones, J., P582, P594  
 Jones, K.N., 5085  
 Jones, S., P5613, P5704  
 Jones, T.H., P4664  
 Jongbloed, M.R.M., P573  
 Jongjirasiri, S., P4655  
 Jons, C., P1667  
 Joos, T., P4867  
 Joosen, I., P3012  
 Jordaens, L., P2462, P4147, P4821, 5126  
 Jordan, A., P864  
 Jorge, E., P426, P428, P439, P711, P734, P2973, P2974, P3000, P3827, P3832, P4225, P4537, P4904, 5185  
 Jorje, L., 4961  
 Jorgensen, C.H., 1821, P2299, P4684  
 Jorgensen, C.J., P1440  
 Jorgensen, E., P3226  
 Jorrot, P., P4158  
 Josa, M., P5691  
 Josen, M., P2386  
 Joseph, M., P5461  
 Joshi, A., P2989  
 Joshi, M., P3945  
 Joshi, M.B., 1249, P2202, P4615  
 Joshi, P., P5449  
 Jourdain, P., 1950, 2775  
 Journath, G., P3136  
 Jousset, F., P4865  
 Jouven, X., 133, 255, P624, P3809, P3810, P5424  
 Jovic, A., 5066  
 Jovin, I.S., P4574  
 Jowi, C., P2352  
 Joyce, M., P5388  
 Jozifova, M., P5494  
 Jozwiak, J., 983  
 Jozwicki, D., P5339  
 Juan, O., P3207  
 Juan-Babot, O., P4604  
 Juanatey, J.G., P5603  
 Juanico, A., P2375  
 Juarez, M., P3842  
 Juchet, H., P1291  
 Jude, B., P1568, P2204, P5564  
 Judge, H.M., P1310  
 Judice, C., 2015  
 Juenger, C., P2253, P2998, P4148, P4512, P4514, 5150  
 Juilliere, Y., P508  
 Jukema, J.W., P1351, P1382, P1451, P1453, P1506, P1521, P2075, P2156, P2242, P3011, P3018, P3224, P4082, P4622, P4654, 4956, 4987  
 Jula, A., P571  
 Julliard, J.M., 2006  
 Julius, B., P3356  
 Julliard, J.M., P2121  
 Jumpertz, S., P4142  
 Juneja, R., P777  
 Jung, B., 161  
 Jung, C., P1683, P4484  
 Jung, J., P1704, P5503, P5508  
 Jung, J.H., P5266  
 Jung, J.W.S., 5106  
 Jung, P., P2332  
 Jung, S., P5371  
 Jung, W., P2444  
 Jungschleger, J.G., P3294  
 Juni, P., P2100, P4045  
 Junttila, M.J., P4153, 5121  
 Juolevi, A., 129, P5458  
 Jurcut, R.O., P2183  
 Jurek, M.M., 2678  
 Jurkovic, C., P4856  
 Juthier, F., P5564  
 Kaab, S., 1108  
 Kaba, R.A., P767  
 Kabanov, Y., P3151, P3152  
 Kabat, M., P5542  
 Kablak-Ziembicka, A., P2528, P3914, P3924, P4818, P5504, P5506, P5510, P5537  
 Kachboursa, S., P2067  
 Kaczmarek, M., 125  
 Kaden, J.J., P3364, 3641  
 Kadner, A., P2414, P4777, P5256  
 Kadota, J., P1460  
 Kadota, K., P668, P690, P691, P4038  
 Kadro, D., P4741  
 Kadro, W., P4741  
 Kadziela, J.M., P5542  
 Kaehler, J., 2824, P4510  
 Kaelsch, H., P1585  
 Kaelsch, T., P4636  
 Kaelsch, T.K., P4145  
 Kaese, S., 3779  
 Kaess, B., 983  
 Kaestel, M., P3252  
 Kaewsukkho, P., P2351  
 Kafantaris, J., P5297  
 Kafkas, N., P3189, P3231  
 Kafouri, A., P2282  
 Kafsack, F., P2946  
 Kageyama, N., P1359  
 Kahan, T., P4173  
 Kahlert, P., 5157  
 Kahn, M.B., 242  
 Kahraman, G., P4193, P4264  
 Kahveci, G., 2770  
 Kaider, A., P5282  
 Kaik, J., 2780  
 Kaikkonen, K.S., P4153  
 Kail, B., P3045, 5219  
 Kaiser, C., P669, P4705, P5289  
 Kaiser, C.A., P673  
 Kaiser, R., P1604, P4478  
 Kajimura, I., P2385  
 Kajinami, K., P4629  
 Kajiya, T., 5129, P5605, P5628, P5650  
 Kakadiaris, I., P3921  
 Kakkavas, A., P2536  
 Kakkamanis, L., P1484  
 Kaku, K., P2181, 5092  
 Kakuchaya, T.T., P415  
 Kakuta, T., P1367, P3015  
 Kala, P., P2987, P3200, 4990  
 Kalahasti, V., P4815, P5349  
 Kalai, T., P1418  
 Kalantzi, K., P658, P1315, P1319, P1552  
 Kalarus, Z., P440, P451, P659, 1147, P2133, P2393, P2963, P3143, P3230, P3849, 5240, P5279, P5287, P5309  
 Kaldara, E., P861  
 Kalifa, J., P3032  
 Kalikazaros, I., P2364, P3898  
 Kalimanovska, D.K., P2970  
 Kalinczuk, L., P3274, P5542  
 Kalinic, H., P3796  
 Kalinin, L., P780  
 Kalinowski, M., P749  
 Kalkum, G., P3288  
 Kalla, K., P5275  
 Kalla, M., P790  
 Kallikazaros, I., P625, P634, P869, P1483, P2212, P2232, P2236, P2286, P2529, P2539, P3134, P3146, P3408, P3923, P3990, P4009, P4253, P4256, P4258, P4928, P5419, P5708  
 Kallikazarou, E., 1022, P5390  
 Kallinen, L.M., P1651, P1655, 1913  
 Kallistratos, M., 165, 2641  
 Kallmeyer, B., 903  
 Kallvikbacka-Bennett, A., P4214, P4894  
 Kalmanti, M., P3049  
 Kalmucki, P., P5257  
 Kalogeropoulos, A.P., P4222  
 Kalogeropoulou, S., P2230  
 Kalogirou, S., P5395  
 Kalra, P., P4518  
 Kalra, P.R., P3327, P3368, P5447  
 Kalra, R., P1561

- Kaitoft, A., P650  
 Kaitoft, A.K., P5286  
 Kam, C., P4002  
 Kamakura, S., P3317  
 Kamal, A., P3324  
 Kamalvand, K., P678  
 Kamath, G., 233  
 Kambaxis, M., P4692  
 Kamensky, G., P5475  
 Kameyama, T., P3188  
 Kamimura, R., 1923  
 Kaminek, M., P3081, 3649, P3879  
 Kaminska, A., P5590  
 Kaminski, K., P484, P845, P3874, P5300  
 Kaminski, K.A., P663  
 Kamioka, M., P4477  
 Kamisago, M., P4754  
 Kamiya, H., P2308, P3079  
 Kamiya, K., P402  
 Kamke, W., P4261, P5724  
 Kammoun, S., P2353, P4121  
 Kamp, O., P495  
 Kampmann, C., P3249, P3288  
 Kamvrogianis, P., P2144  
 Kan, S., P4067  
 Kan, S.C., P3010  
 Kanagaratnam, P., P2465  
 Kanamori, H., P5515  
 Kanashiki, M., P3323  
 Kanda, G., 5129, P5628  
 Kanda, S., P4070, P4180  
 Kandolf, M., 5232  
 Kandolf, R., P3287, P4248  
 Kaneko, H., P2964, P5486  
 Kaneko, N., P4921  
 Kaneshige, K., P5719  
 Kanety, H., P1475  
 Kang, D.H., P4896  
 Kang, H.-J., P2108  
 Kang, J.C., P543, P2436, P2993, P3093, 3560, P4152, 4988, P5358  
 Kang, J.C.K., 1111  
 Kang, W.C., P4535  
 Kanidieva, A., P4821  
 Kannan, A.O., P2084  
 Kanoupakis, E.M., P1672  
 Kanse, S., P463, 889  
 Kanse, S.M., P544  
 Kantaria, N.M., P620  
 Kanters, J., P5442  
 Kanzler, I., P1385  
 Kao, M.P.C., P429  
 Kaoukis, A., P3330  
 Kapelak, B., P1320, P2313  
 Kapeliovich, M., 1145, P2996  
 Kapeller, B., P2322  
 Kapetanakis, V., P2148  
 Kapil, V., P2545  
 Kaplan, P., P2988  
 Kaplanis, I., 5145  
 Kaplanoglou, T., P2220  
 Kappenberger, L., P4873  
 Kappert, K., P4606  
 Kapsali, E., P3208  
 Kapur, A., P3142  
 Karabelas, J., P1462, 4984  
 Karakas, M., 132, P4669  
 Karali, K., P5662  
 Karalis, I., P2252, P2257, P2259  
 Karamermer, Y., P660, 2003  
 Karamitsos, T., 5070  
 Karamitsos, T.D., P5340  
 Karampelas, J., P647  
 Karanasios, E.K., P2350  
 Karanasios, E.S.K., P2378  
 Karanasos, A., 395, P452, P1462, P1522, P3204, 3559, P4064, P4627  
 Karaoli, E., P4766  
 Karapanagiotou, O., 2868  
 Karapatsoudi, E., P5637, P5662  
 Karapinar, H., P3326  
 Karapolat, H.K., P581  
 Karasik, A., P1475  
 Karason, K., P648  
 Karatasakis, G., P2149  
 Karatzas, D., 126, P5666  
 Karavelioglu, Y., P3326  
 Karavidas, A., P449, P5587  
 Karavolias, G., P1700, P3251  
 Karayannis, G., P2144, P2513  
 Karch, M.R., P4845, 5100  
 Karck, M., P545, P2308, P2324, P3079  
 Kardara, D., P3171, P3405, P4702  
 Kardasz, I., P5651  
 Kardos, A., P3343  
 Karevold, A., P3391  
 Kargul, W., P4561, 5065  
 Karhunen, P.J., P5430  
 Karjalainen, P.P., P682  
 Karkavitsas, N.S., P2252  
 Karlberg, I., 5235  
 Karlsson, G., P3144  
 Karlsson, L., P5411  
 Karmann, B., P5408  
 Karnik, R., P4032  
 Karoff, M., P4261, P5724  
 Karpanou, E., P867, P2527  
 Karpenko, Y., 2780  
 Karpouzas, G., P1588  
 Karpov, R., 2871  
 Karsdal, M.A., P4607  
 Karvinen, H., P2203, P5389  
 Karvounaris, S., P3163  
 Karwatowska-Prokopczuk, E., P3295  
 Kasama, S., 5089  
 Kasapara, A., P1536  
 Kasatzker, M., P4211  
 Kaschina, E., 239  
 Kase, M.T., P2088  
 Kasemisaeid, A., P490  
 Kasiakogias, A., 386, P625, P2224, P2236, P2284, P2529, P2538, P3990, P4253, P4266  
 Kaski, J.C., 898, P3174, P3848, P4526, P5377  
 Kasner, M., 1123  
 Kasper, M., P3385  
 Kasprzak, J.D., 125, P484, P1293, P1297, P2506, P3054, P3064, P3863, P3874, 5015, 5096, P5314, P5339  
 Kass, D.A., P5406, P5629, P5700  
 Kassab, R., P4857  
 Kasseckert, S.A., P1394  
 Kassianos, G., 1798, P3125, P5476  
 Kassim, S.S., P834  
 Kassner, A., P1691  
 Kastanioti, C., P4013  
 Kastelein, J.J., P2244  
 Kastelein, J.P.P., 1796, P2253, 3543  
 Kastl, S.P., P5376  
 Kastner, J., 345, P860  
 Kastner, P., 5223  
 Kastorini, C., P468, P859, P4217, P4919, P5667, P5703  
 Kastrati, A., P472, P539, P644, P670, P684, 894, 1006, P1313, P1332, P1512, 2929, 2931, P2995, 3771, P4705, P4711, 5114, P5304  
 Kastrup, J., P1299, 2816, P3226  
 Kataiwa, H., 3561  
 Kataoka, M., P4495  
 Kataoka, T., P633  
 Katidis, Z., P2962, P2986  
 Katinakis, S., P781  
 Katinioti, A., 1014, P1486  
 Katlama, C., P4257  
 Kato, H., P1517  
 Kato, K., P445, 1013, 1024, P3057, P3997, P4011, P4014, P5437  
 Kato, O., 2934  
 Kato, S., P402, P1348, P4559  
 Kato, T., 3640  
 Katoh, H., P691, P3220, 3563  
 Katoh, O., P1505, 3562  
 Katou, H., P4038  
 Katritsis, D., P1615, P4044, P4813, 5215  
 Katsafados, M., P3208  
 Katsaras, D., P792  
 Katsaros, C., P3163  
 Katsaros, F., P861  
 Katsaros, K., P5376  
 Katsaros, L., P861  
 Katsarou, A., 3539  
 Katsarou, O., P5417  
 Katsi, V., P634, P3134, P4009, P4258  
 Katsilambros, N., P3975  
 Katsiloulis, S., 2868  
 Katsiora, E., P4013  
 Katsiyiannis, W.T., P1651  
 Katsoudas, S., P2230  
 Katsoulas, T., 126, P3157  
 Katsouras, C.H., P658, P1552  
 Katsouras, C.S., P2103  
 Katsube, Y., P4754  
 Katsuki, T., P3989  
 Katus, H., P434, 1958, 2768, P3851, P4157, P5270, P5271  
 Katus, H.A., P569, P636, P1586, P2422, P2524, P3234, P3256, P3396, 3781  
 Katz, E., P4164  
 Katz, R., P2078  
 Kauer, F., P493, P3381  
 Kaufels, N., P3206  
 Kaufmann, B.A., 5093  
 Kaufmann, J., P1321  
 Kaufmann, P., P2075, P2078, P4562  
 Kaufmann, P.A., 396, 399, P3011, P3033  
 Kaul, A., P4639  
 Kaulitz, R., P4780  
 Kaun, C., P5376, P5405  
 Kaushal, S.K., P4811  
 Kautzner, J., P729, P1684, P2461, P3324, 5107  
 Kavanagh, K., P2471, P2473  
 Kavantzias, N., P2492  
 Kavouras, C., P2364, P3898  
 Kavvouras, C., P5417  
 Kawaguchi, N., P1367, P3015  
 Kawahara, C., P814, P4262  
 Kawai, H., P5605, P5650  
 Kawai, M., P4554  
 Kawai, Y., P1514, P4629  
 Kawakami, J., P1671  
 Kawakami, T., P4495  
 Kawalec, W., P1433, P4783, P5590  
 Kawamata, H., P4630  
 Kawamiya, T., P445, P3057  
 Kawamori, H., P1517, 3563  
 Kawamoto, M., P733  
 Kawamoto, T., P1537, P2405, P3869, 4986  
 Kawamura, A., P2964, P3183  
 Kawamura, I., P4572, P5515  
 Kawamura, M., 284  
 Kawamura, R., P838, P3908, P5649  
 Kawano, R., P838  
 Kawano, S., P1331, P1582  
 Kawano, Y., P1460  
 Kawasaki, M., P3899, P3904, P4071, P4177, P4179, P4572  
 Kawasaki, R., P839  
 Kawase, Y., P1692  
 Kawecka-Jaszcz, K., 163, P477, P872, P2269, P3415, P4255  
 Kawecki, D., P451  
 Kaya, A., P4268, P4468  
 Kaya, B., P1353  
 Kaya, H., P2411, 2770  
 Kaya, M.G., P1536, P2533, P3362, P4808  
 Kaya, Z., P3326  
 Kaye, D.M., P1689, 5135  
 Kayembe, P., P1437  
 Kaymaz, C., P1584, P1600, P1605, P1611, P5322, P5325  
 Kaynar, G., P2237  
 Kayser, T., P5706  
 Kazakov, A., P3083  
 Kazazaki, C., P5341, P5345, P5351  
 Kazdova, L., P3349  
 Kazmierska, B., P4859  
 Kazmierski, M., P3068, P3089  
 Keane, D., P783  
 Kearney, M.T., 242  
 Keavney, B., P3246  
 Kedde, H., P4782  
 Kee, F., 253, P4159, P5434, P5443  
 Keefe, D.L., 1105

- Keegan, J., P2388  
Keenan, N., P3174  
Keenan, N.G., P4551, P4618  
Kehtari, R., P4164  
Keidar, Z., P4576  
Keil, U., 1795, P3114, P3976, P4656  
Keilberg, P., P3028, P4543  
Keithahn, A., 2912, P4541  
Kelbaek, H., P3226, P3282, P4705  
Kelder, J.C., 1956, P4887  
Kelemen, K., P569, 3781  
Keles, N., P1584, P1600, P1611, P5322, P5325  
Keles, T., P5319  
Kelishadi, R., 3537, P4028  
Kelleher, C., P4027  
Kelleher, C.C., P5470  
Keller, S., P5385  
Keller, T., P3120  
Kellermair, J., P1715  
Kelly, G.E., P4027  
Kelly, R., P1689  
Kelm, M., P807, P2125, P3029, P3056, P3063, P3882, P4134, P5383  
Kelsey, S.F., P4519  
Kemi, O.J., P3391  
Kemp, B.E., 5135  
Kemper, D., P489  
Kempf, T., P1294  
Kempny, A., P5327  
Kendall, C.W., P1488, 3529  
Keng, F., P1365  
Kennard, E.D., P4519  
Kenneback, G., P1637  
Kent, K., P5719  
Keogh, B., 2017  
Kepka, C., P3128  
Kerans, V., 292  
Kerber, S., P1277, P2096, P2990, P3180, P3277, P4829  
Kerebel, S., P5582, P5635  
Keren, A., P4236, P4246, P4260  
Kereskai, L., P1418  
Kerkau, T., P1569  
Kerkeni, M., P2112  
Kern, B., P3234  
Kerr, D., 2870  
Kerver, M., P3105  
Kervio, G., P601  
Kesaniemi, A., P5570  
Kesavan, S., P3793  
Kessel, A., P740  
Kessels, R., 2762  
Keta, T., P4711  
Kettering, K., P1618, P1630, P2452, P4505, P4874, P5399  
Kettner, J., P729, P4227  
Kevorkova, Y.G., P448  
Keweloh, B., P1616  
Kh, N.G., 1959  
Khachigian, L., P2065  
Khafaga, M., P552, 1242  
Khai, N.C., P2483  
Khairy, P., P805  
Khalifa, E., P2398, 3643  
Khan, A., P834  
Khan, D., P3826, P5488, P5491  
Khan, F., P4831, P4866  
Khan, F.Z., P4506  
Khan, J., P2273  
Khan, M., P4570  
Khan, S.Q., 283, 1959, P3855  
Khan, Y., P3793  
Khandelwal, N., P2217  
Kharbanda, R.K., P5553  
Kharlamov, A.N., P3077  
Khatab, A., P643  
Khattar, R.S., P616, P1554  
Khavandi, K., P3110  
Khawaja, K., P3951  
Khazen, C., 1901  
Khin, L.W., P833  
Khogali, S., P2089  
Khokhlunov, S., P1296, P4511  
Kholmovsky, E., P4819  
Khoor, M., P3045, 5219  
Khoor, S., P3045, 5219  
Khosla, S., P2309  
Khouatra, C., P1587, P4892  
Kiavar, M., P2417  
Kidawa, M., 5096  
Kiencke, S., P3356  
Kiene, V., P2270  
Kienzle, R.-P., P4053  
Kiernan, T.J., P4733  
Kiess, W., 3528  
Kiessling, A., P589, P3121  
Kiesz, R.S., P3218, 4948  
Kihara, Y., P1360, P2216, P3215, P3416, P4583, P5541  
Kikkert, W.J., P2938  
Kikushima, K., P3818  
Kilani, T., P2067  
Kilany, A., P1710  
Kilger, E., P4566  
Kilian, H., P3027  
Kilic, T., P1290, P4193, P4264, P5598  
Killermann, D.P., P3840  
Kilner, P.J., P2388  
Kilpatrick, D., P1590  
Kilpijoki, J., P2203  
Kilter, H., 244  
Kim, B.H., P730, P1457, P1472  
Kim, B.J., P3411  
Kim, B.R., P1515, P5400  
Kim, C.H., 1258  
Kim, C.J., P420, P2982, P2992, P4533, P4676, P5415  
Kim, D.I., P4709  
Kim, D.K., 1096  
Kim, D.S., P4709  
Kim, H., P2142, P3216, P4184  
Kim, H.-K., 5095  
Kim, H.-S., P2108  
Kim, H.K., P2992, P3938, P5629  
Kim, H.S., P4728, P5266  
Kim, H.T., P2142, P3216, P4184  
Kim, I.C., P3216, P4184  
Kim, J.-O., P462, P5379  
Kim, J.-S., P1511  
Kim, J.B., P5410  
Kim, J.H., P2436, 3560, P4152, 4988  
Kim, J.H.K., 1111  
Kim, J.K., P5323  
Kim, J.S., P1511, P4066  
Kim, J.Y., P2091, 2673, 3558, P4648, P4651  
Kim, K.B., P2142, P3216, P4184  
Kim, K.H., P4728  
Kim, K.J.H., 5106  
Kim, K.S., P420, P4533, P4676, P5367, P5370, P5400, P5410, P5415  
Kim, M.C., P3225  
Kim, M.K., P5266, P5367  
Kim, O.R., P1515  
Kim, S., P3180  
Kim, S.-J., P523, P5592  
Kim, S.H., P5323  
Kim, S.J., P5367  
Kim, S.K., P1380, P4016  
Kim, S.W., 4988  
Kim, S.Y., P2289, P5410  
Kim, T., P2435  
Kim, T.H., P1511  
Kim, T.I., P1457  
Kim, U., P4709  
Kim, W.-J., P3198  
Kim, W.J., P543, 4952  
Kim, W.S., P5367  
Kim, Y., P4815  
Kim, Y.-H., P3198  
Kim, Y.-J., 5095  
Kim, Y.H., 1109, P3900, 4952  
Kim, Y.J., P420, P2172, P2289, P2982, P2992, P3938, P4533, P4676, P5354, P5370, P5415, P5629  
Kim, Y.K., P2289  
Kim, Y.N., P2142, P3216, P4184  
Kim, Y.S., P3093  
Kimman, G., P2440, P3053  
Kimura, G., P445, P476, 1013, P3057, P3983, P3997, P4014, P4660, P4667, P4668, P4678  
Kimura, K., P3867  
Kimura, M., P688, P1366, P1505, 3562  
Kimura, T., P652, P656, P4067, P5248  
Kimura, Y., P4707  
Kincl, V., P3081  
Kinderlerer, A., 390  
Kindler, B., P5539  
Kindsmueller, S., P4845  
Kingue, S., P3332  
Kingwell, B., 5135  
Kini, A.S., P3225  
Kink-Eiband, M., P2110  
Kinnaird, T.D., P3202  
Kinnear, C., P3246  
Kinoshita, M., P532  
Kinoshita, Y., P688, P1366, P1505, 3562  
Kiotsekoglou, A., P2070, P2148, P3269, P4189, P5552  
Kiowski, W., 5084  
Kipshidze, N., P647, P3204  
Kircher, S., P764, P4871  
Kirchhof, P., P2438, 3779, P4836  
Kirchmair, R., P2189  
Kirilmaz, B., P418, P1369  
Kirk, P., P3285  
Kirkby, N.S., P4597  
Kirkeby-Garstad, I., P3391  
Kirma, C., P3326  
Kiroudis-Markantonis, S., P5668  
Kirsch, M.K., P2111  
Kirsch, S., 1156  
Kirschbaum, N., P1577  
Kirschbaum, S.W., P660  
Kirschbaum, S.W.M., 1252, P4035  
Kirschmann, D.F., P4732  
Kirtane, A.J., 1957  
Kiryu, M., P554, 3659  
Kisacik, H., P3319  
Kische, S., P547  
Kishi, K., P471, P2119, P5302  
Kisko, A., P868  
Kispert, E.M., P4548  
Kiss, I., P3115  
Kiss, M., P5615  
Kiss, R.G., P4233, P4234  
Kisselbach, J., P2422  
Kistorp, C., P5663  
Kita, T., P532  
Kita, Y., P5683  
Kitabata, H., P469, 900, P1278, P1304, 3561, 3566, P4052, P4472  
Kitagawa, K., P1348, P3275, P4559  
Kitagawa, T., P1360  
Kitahara, H., P693, P1503  
Kitamura, M., P826  
Kitaura, Y., 5229  
Kitayama, M., 2934, P4629  
Kitslaar, P.H., P3018  
Kivimaki, M., P5441  
Kiviniemi, T.O., P4591  
Kiviniemi, V., 3644  
Kiwan, G., P3119  
Kiyakbaev, G.K., P2497  
Kjaer, A., 2816  
Kjaer, M., P1681  
Kjaergaard, J., P4795, P4797  
Kjekshus, J., 1100, P4205, P4634, P5679, P5685, P5701  
Kjeldsen, S.E., P866, 1015, P2122, P3877, P4679  
Klaassen, S., P3244  
Klaudiel, J., P2116  
Klauss, V., P1540, P2332, 2818, P5705  
Klautz, R., P857  
Klautz, R.J., P2179, 3648, P4102, P4903  
Kleber, F., P1616  
Kleber, F.X., P5705  
Klecicka, J., P4700  
Kleczyński, P., P683, 4955  
Kleemann, T., P1646, P1665, P4157  
Kleijn, S., P495  
Kleijnen, B., P758  
Klein, B., 4994

- Klein, G., P849, P2355  
 Klein, H.-U., P4188  
 Klein, J., 157, P3159, P5525  
 Klein, M., P4063  
 Kleinecke, C., P4054  
 Kleinert, C., P4744, 5132  
 Kleinman, N.K., 5068  
 Kleinrok, A., P756  
 Kleinschmidt, K., P5686  
 Klemm, H.U., P5634  
 Klemmstein, D., P4905  
 Klepetko, W., P713, P724  
 Klersy, C., 233, P1266, P1281, P1707, 2050,  
     P2161, P4228, P4560, P4646  
 Kleta, S., 1126  
 Klibanov, A., P5352  
 Kliebe, C., P5672  
 Kliebe, F., P5672  
 Klima, T.H., P4201  
 Klimeczek, P., 1259, P4480, P5328  
 Klimusina, J., P1707, P2161, P4560, P4646, 5067  
 Klingel, K., 2912, P4248, 5232, P5580  
 Klingenberg, R., P4590  
 Klinghammer, L., P3868  
 Klinkenberg, T., P4875  
 Klinowski, J., P3212  
 Klip, Y.T., P4913  
 Klisiewicz, A., 2766  
 Kliver, E., P3091, P3097  
 Kloczek, M., P4255  
 Kloch-Badelek, M., P477, P872  
 Klocke, R., P4640  
 Kloetzel, P.M., P4888, P5580  
 Klok, F.A., P700  
 Klopotowski, M., P1567, P4139  
 Klopowski, M., P3274  
 Kloppe, A., P5647  
 Klosinska, M., P5314  
 Klueter, H., P4636  
 Klug, G., P1347  
 Klugman, S., P5268  
 Kmec, J., P868  
 Kmecova, J., 5226  
 Knaapen, P., 401  
 Knackstedt, C., P807, P3056  
 Knapp, M., P5300  
 Knapp, S., 4969  
 Knappe, M., P1583  
 Knaus, T., P5624  
 Knebel, F., P2099, P4700  
 Knecht, S., P4828  
 Kneussl, M.P., 5177  
 Knie, W., P1523  
 Knight, C., P628, P3142, P4086  
 Knight, C.J., P4088  
 Knirsch, W., P4779  
 Knobelsdorff-Brenckhahn, F., 2020  
 Knoell, R., P1415  
 Knopf, P., P4594  
 Knopp, A., 5051  
 Knopp, R.H., P3122  
 Knosalla, C., P489, 1005, P1525, P1685  
 Knowles, R., P4086  
 Knudsen, E.C., P1468  
 Knyshev, G., P5581  
 Ko, J.S., P2993, 3560, 4988, P5358  
 Ko, W.J., P703  
 Ko, Y.G., P1511, P4066  
 Koa-Wing, M., P2465  
 Koba, S., P2196  
 Kobalava, Z., P5715  
 Kobalava, Z.H.D., P2497  
 Kobashigawa, J., P2523  
 Kobayashi, H., P2478, P4572  
 Kobayashi, T., P4554  
 Kobayashi, Y., P693, P733, P1338, P1503, P2196,  
     P2470  
 Kober, F., P3032  
 Kober, L., 882, 1821, P3130, P4846, 5076, P5442  
 Kober, L.K., P1440  
 Kobylecka, M., 392  
 Koca, F., P1584, P1600, P1605, P1611, P5322,  
     P5325  
 Kocaman, S.A., P832  
 Kocgirli, O., P2222  
 Koch, A., 1257, P1364, P2324  
 Koch, E., 977, P1724  
 Koch, K.T., P1302, 3569  
 Koch, L., P761, 5218  
 Koch, M., P569, 3781  
 Koch, W., P472, P539, P670, 3771  
 Koch, W.J., P819  
 Kochanowski, J., P1562, P4843, P5315, P5337  
 Kochev, A., 5241  
 Kochiadakis, G., P5725  
 Kochiadakis, G.E., P694, P1546, P1547  
 Kochman, J., 392, P1328  
 Kocic, G., P619  
 Kocka, V., P791, P1729, P2402  
 Kockova, R., P1729  
 Kockskaemper, A., 1126, P4911  
 Kockskaemper, J., 1242  
 Kockskemper, J., P552  
 Kocoski, V., P1569, P3025  
 Kodama, I., P402  
 Kodama, K., P4060  
 Kodama, T., 284  
 Kodlipet, D., P1309  
 Koebke, J., P4833  
 Koeber, L., P2290, P3282  
 Koegler, D., 5100  
 Koekemoer, A.L., P1405  
 Koektuerk, B., P1644, P2120, P2429  
 Koellensperger, E., P4505, P4874, P5399  
 Koenen, R., P1385  
 Koening, A., P2332  
 Koening, H., P560  
 Koening, I.R., P4689  
 Koening, T., P849  
 Koening, W., 132, P3848, P4669  
 Koerfer, J., P4545  
 Koerner, A., 3528  
 Koester, I., P757  
 Koester, R., 2824, P4510  
 Koestlin, N., P5375  
 Koeth, O., P4148, 5150  
 Koga, S., 1146, P1452, P4012  
 Kogaki, S., P626  
 Koglek, W., P5653  
 Kogushi, M., P2097  
 Koh, A., P447  
 Koh, J.H., P1526  
 Koh, J.S., P2436  
 Koh, K., P4263  
 Koh, K.K., P4535  
 Koh, S.B., P4648, P4651  
 Kohler, M., P4542  
 Kohlhaas, M., 5051  
 Kohli, V., P2374  
 Kohno, H., P4021  
 Kohno, S., 1146, P1452, P4012  
 Kohno, T., P4499, 5143, P5486  
 Kohro, T., 2825  
 Koide, K., P5665  
 Koide, M., P413  
 Koide, Y., 1146  
 Koike, M.K., P4498  
 Koitabashi, T., P1560  
 Kojda, G., P2222, P3960  
 Kojima, Y., P532  
 Kokkinos, J.P., 131, 2641  
 Kokkinos, P., 131  
 Kokkinos, P.F., 165, 2641  
 Koko, T., P2104  
 Kolar, M., P3349  
 Kolatkar, N.S., P696, P1735  
 Kolb, C., P797  
 Kolbel, T., 154  
 Kolditz, D.P., P573  
 Koledinsky, A., 2826  
 Koliaki, C., P3975  
 Koliviras, A., P4944  
 Kolkman, E., P1311  
 Koller, A., P880  
 Koller, M.L., P4829  
 Kollias, A., P3106  
 Kollias, G., P4944  
 Kollmann, A., 5223  
 Kollmar, R., P5498  
 Kolodgie, F.D., 393, P4632  
 Kolokathis, F., P3251  
 Kolomiets, V.V., P5726  
 Kolomvotsou, A., P1487  
 Kolossvary, E., P3115  
 Kolovou, G., P2268, P5674  
 Kolyrina, E.N., P5462  
 Komajda, M., P2490, 2918, P3351, 5041  
 Komarov, A., P4693  
 Komatsu, T., P1548  
 Komnou, A., P3399, P3401, P4681  
 Komocsi, A., P1317, P5283  
 Kompa, A., P1687  
 Komukai, K., P1278  
 Komuro, I., P693, P1503, 5001  
 Kon, M., P4570  
 Konarska-Kuszweska, E., P3918  
 Konda, R., P5437  
 Kondratiev, T.V., P3884  
 Kondys, M., 4948  
 Konen, E., P1362, P3017  
 Kong, P.K., 5152  
 Kongerud, J., 243  
 Kongsgaard, E., P2175, P3306, P5366, P5606,  
     P5631  
 Kongstad, O., P1621, P1643  
 Konig, R., P4735  
 Konka, M., P4139  
 Konkolowska, M., 4948  
 Konniari, A., P3972  
 Konnov, M.V., P3996  
 Konopka, A., P1420  
 Konorza, T., P1585  
 Konstandin, M., P2524  
 Konstantinides, S., 5186  
 Konstantinidis, A., P658, P1552  
 Konstantinidis, D., P2200  
 Konstantinidou, M., P2429  
 Konstantinou, D.M., P1477  
 Konstantinov, V.V., P2301  
 Kontaraki, J., P5725  
 Kontaraki, J.E., 2761  
 Kontny, F., P830, P2277, P2969  
 Kontos, C., P4218  
 Kontsas, K., P2540  
 Kontula, K., P571  
 Kontush, A., P5444  
 Konya, V., P3357  
 Konyi, A., P5283  
 Koo, J.J., P1431  
 Koolen, J., P4735  
 Kooner, J., P5482  
 Kooner, J.K., P5394  
 Kooner, J.S., P496, 1151, P4645  
 Koopmans, S.J., P3968  
 Koos, R., P4134, P5383  
 Kopec, G., 3642  
 Kopp, C.W., P1323  
 Kopp, F., P3032  
 Koppen, H., P4802  
 Koppensteiner, R., P1323, P5516  
 Kopsida, Z., P2138  
 Korantzopoulos, P., P3328  
 Kordosis, G.E., P1471  
 Koren, G., P405, P5451  
 Koren-Morag, N., P1475, P3017, 3545  
 Koretsune, Y., P413  
 Korinek, J., P1424  
 Korkmaz, S., P545, P2324  
 Korkmaz, Y., P1447  
 Kormali, L., P3929  
 Kornowski, R., P649, P667, P1507, P2407, P4061,  
     P4068, P5277  
 Koroboki, E., P4944  
 Koroglu, S., P4192  
 Korovesis, S., P4044  
 Korpisalo, P., P2192, P2203, P5391  
 Korsgaard Thomsen, K., P3136  
 Kort, S., P2182  
 Korte, S., P1675, P4226, P5693  
 Kortelainen, M.-L., P4153  
 Koryagina, N.A., P5462  
 Korybalska, K., P3964



- Koschyk, D., 5158  
 Kose, O., P2303  
 Koshiba, K., P1558, P4538, 4957  
 Kosior, D.A., P4843  
 Koskenvuo, M., P5441  
 Koskinas, K., P3936, P4069, P4602, P4619, P4760, P5662  
 Kosma, L., P3268  
 Kosmala, W., P817, P3982, P4920  
 Kossyvakis, C., P3330, 5145, P5297  
 Kostapanos, M., P4013  
 Koster, A., P1321  
 Kostin, S., P843, P1406, P1409, P1545, P2206, P3371  
 Kostkiewicz, M., P2528, P3881, P4480, P5328  
 Kostopoulos, C., P529, P3044, P5397  
 Kostrubiec, M., P704, P707, P747  
 Kotakos, C., P5251  
 Kotby, A.A., P1601  
 Kotecha, D., 1102, P2493, P4745  
 Kothari, S.S., P777  
 Kotlarz, A., P5303  
 Kotliar, C.V., P3926  
 Kotrc, M., P729, P1684  
 Kotrogiannis, I., P5703  
 Kotsakou, M., P5637  
 Kotsava, K., P582, P594, 1795, P3114  
 Kotsinas, A., P5535  
 Kotti-Tounsi, S., 5109  
 Kottkamp, H., P766, P4854  
 Kottke, D., P4923  
 Kotwica, T., P817  
 Kougialis, S., P635, P878, P4933  
 Koukouraki, S.I., P2252  
 Kouloupoulou, M., P2947  
 Koumallos, N., 1022, P1682, 4998, P5390  
 Kourliouros, A., P2070, P2072, P4189  
 Kouskouni, E., P878, P4933  
 Koustas, P.A.N., P1471  
 Koutbi, L., 1904  
 Koutouzis, M., P3223  
 Kouvousis, N., 5145, P5297  
 Kovac, M., P4199  
 Kovacic, N., P2223  
 Kovacs, I., P2132, P3045, 5219  
 Koval, O., P2988  
 Kovaleva, E., P3267  
 Kovalski, G., P4585  
 Kovanen, P.T., P5565  
 Kovatsi, L., P1477  
 Kowal, J., P3196  
 Kowalcuk, A., P2133, P2307  
 Kowalczyk, J., P440, P659, 1147, P2963, P3230  
 Kowalik, I., P609, P3262, P4859  
 Kowalski, G., P4576  
 Kowalski, M., P5339  
 Kowalski, O., P440, P659, 1147, P2963  
 Kowatsch, I., P4748  
 Kownator, S., P5539  
 Koyak, Z., P4767  
 Kozak, M., P793, P3118  
 Kozakiewicz, K., P3161  
 Kozakova, M., P1429, P1454, P4650  
 Kozanecki, A., P2528, P3914, P3924  
 Kozanitou, M., P536, P1287, P3917  
 Kozarez, I., 4959  
 Kozdag, G., P4193  
 Kozhukhov, S., P2959  
 Kozieradzka, A., P663, P5300, P5712  
 Kozlova, E.E., 2783  
 Kozluk, E., P756  
 Kozma, G., P2132  
 Kozuch, M., P5300  
 Kozuki, A., P1517, 3563  
 Kraaijenhagen, R.A., P3123  
 Krabatsch, T., 1004, 1005  
 Krabbendam, S.C., P3210  
 Kraemer, B., P4613, 5232  
 Kraemer, J., P1298  
 Kraemer, N., P3029  
 Kraenkel, N., P2480  
 Kraft, T., P3245  
 Krahn, T., P1614, P4902  
 Kraigher-Krainer, E., P4531  
 Krajcoviechova, A., P5494  
 Krakowiak, B., 5059  
 Kralisz, P., P663, P5300  
 Kramer, F.M., P1614  
 Kramer, M.C., P1302  
 Kramer, M.C.A., P4632  
 Krane, M., P4637  
 Kranendonk, S.E., P5539  
 Kranig, W., 5062, 5063  
 Krankenber, H., P5489, P5518  
 Krapf, L., P2413  
 Krapiec, F., P2408  
 Krarup, P.M., P4490  
 Kraska, A., P4859  
 Krason, M., P2343  
 Krasowski, W., P2116  
 Krasuski, R.A., 147, P745, P1580, P3132, P4815, 5175  
 Kratzler, H., P3258  
 Kraus, F., P3364  
 Krause, K., P2120  
 Krause, K.T., P5634  
 Krause, S., P2287  
 Krausgrill, B., P3066, P3072  
 Krausova, D., P5709  
 Krauss, J., 336  
 Kravitz, B.G., P696, P1735  
 Kravos, A., P3118  
 Krebs, A., P5624  
 Krecki, R., P1293, P1297  
 Kreidel, F., P4566  
 Kreissl, M., 902  
 Kremastinos, D., 126, P792, P1487, P1663, P2230, P2540, P3157, P3822, P4900, P4926, P5251, P5393, P5502, P5666, P5668  
 Kremastinos, D.T., P1383, P2169, P2220, P2241, P2492, P3106, P4854, 5144, P5348  
 Kremastinos, D.T.H., P1484, P3251  
 Kremen, V., 5220  
 Kremer, K., P1594  
 Kremser, C., P1401  
 Kreplak, L., P3373  
 Krestin, G., P4129  
 Krestin, G.P., P660, 1252  
 Kreuter, G., P5448  
 Kreutz, R., P4261, P5724  
 Krey, A., P1664  
 Kriatselis, C., P403, P4200, 5212  
 Kriatselis, C.H., P2435  
 Krichene, S., P2353  
 Krieg, L., 2915  
 Krieger, E.M., P2957, P4929  
 Krieger, J.E., P458, P534  
 Krieger, U., P1531  
 Kriger, J.E., P538  
 Krings, P., P1585  
 Krishnan, A., P2389  
 Krishnaswamy, A., P3846, P5294  
 Kristen, A., P2524  
 Kristensen, S.D., P1322  
 Kristensen, S.R., 148  
 Kristesiashvili, T.V., P620  
 Kristiansen, S.B., P4490, 5142  
 Kristiansen, I.B., P4714  
 Kristoffersen, U.S., 2816  
 Kritharides, L., P677  
 Kritharis, E.P., P5490  
 Krivan, L., P793  
 Krijanac, G., P444, P2126  
 Krmeta, M., P3116  
 Krobot, K.J., 3541  
 Krochin, M., P3179  
 Kroemer, H.K., 2675, 3658  
 Kroetz, F., P2215, P2332  
 Kroft, L., 1118  
 Kroft, L.J., P1351, P4141  
 Kroft, L.J.M., P700, P1453  
 Krol, M., 4948  
 Krollick, L., 392  
 Krombach, G.A., P3029  
 Kromhout, D., P3113  
 Kronberg, K., P3055  
 Kronen, P., P2077  
 Krook, A., P605, P3961  
 Kropacheva, E.S., P2439  
 Krotin, M., P4176  
 Kruessell, M., P3320  
 Kruidenier, L.M., P3164  
 Kruk, M., P637, 2933, P3128, P4139  
 Krum, H., 1097, P1687, 1824, P4745, P5639, P5687  
 Krupinski, M., 1259  
 Kruska, L., P1614  
 Krzeminska-Pakula, M., 125, P484, P1293, P1297, P3064, P3863, 5015, 5096, P5314, P5339  
 Ksiazek, K., P3964  
 Ksiezycka, E., P637, P3128  
 Kuanprasert, S., P4680  
 Kuba, K., P1391  
 Kubala, M., P1628  
 Kubant, R., 384  
 Kubica, J., P5279  
 Kubicek, M., P2101  
 Kubinova, R., 3535  
 Kubo, T., 900  
 Kubota, T., P3899, P4071, P4177, P4179  
 Kuch, M., P4917  
 Kuchynka, P., P720, P3200  
 Kucia, M., P3068  
 Kuck, K., P4157  
 Kuck, K.-H., P2120, P4872  
 Kuck, K.H., P642, P646, P666, P754, P757, P1634, P2429, P4106, P4832, P5634  
 Kuckuck, H., P1497  
 Kucuk, M., P1306  
 Kudo, Y., 2007, P2362  
 Kudraleeva, R., P4511  
 Kuehl, H.P., P3029, P5383  
 Kuehl, U., P1699  
 Kuehne, M., P3304  
 Kuehne, M.K., P4855  
 Kuenzli, A., 1103  
 Kuepper, B., P1337  
 Kufner, S., P684  
 Kuga, K., P1625, P3301  
 Kuhn, B., P1692  
 Kuhn, H., 342  
 Kuhne, M., 247  
 Kuijper, R., P1706, P2170, P2509, 5061  
 Kuiperi, C., P4695  
 Kuipers, F., P3413  
 Kuipers, I., 2921, P3413  
 Kuklik, P., P2426, P2443, P3341, P5560  
 Kuklinska, A., P5712  
 Kukreja, N., P3857, P4030  
 Kukucka, M., P4133  
 Kukula, K., P1567, P3274  
 Kukulski, T., P749, 1147, P2307, P2393, P3230  
 Kulach, A., P4834  
 Kuliczowska-Plaksej, J., P3982  
 Kull, S., P2199  
 Kulzer, B., P2997  
 Kum, L.C., 1103  
 Kumabe, N., P4630  
 Kumar, A., P494, P2137  
 Kumar, A.K.H.S., 5137, P5265  
 Kumar, K., P494  
 Kumar, S., P2210  
 Kumbhani, D., P3826  
 Kumbhani, D.J., P5488, P5491  
 Kunde, J., P4911, P4914  
 Kundu, S., P2427, P4824, P5619  
 Kunishima, T., P3303  
 Kuniss, M., P1624, P3325  
 Kunita, E., P1360  
 Kunitada, S., P2105  
 Kunkl, A., P851  
 Kuno, A., P2476  
 Kunzelmann, M.P., P2451  
 Kuo, W.-W., P5594  
 Kupari, M., P5565  
 Kuper, A., P1541  
 Kupreishvili, K., P3383  
 Kurabayashi, M., 5089  
 Kuramitsu, S., 2642, P4568  
 Kurbanov, R.D., P448  
 Kurek, T., P451, 1147, P2133  
 Kuribayashi, S., P3183

- Kurita, T., P1348, P3275, P4547, P4876  
 Kuritsch, I., P2110  
 Kurjata, P., P637  
 Kurktschiew, D., P4007  
 Kurlykina, N., P787  
 Kurnicka, K., P747  
 Kuroda, N., P693, P1503  
 Kuroi, A., P469, P1304, P4052  
 Kurokawa, S., P554, 3659  
 Kuroki, K., P1625, P5652  
 Kurosaki, K., P3301  
 Kurowski, V., P3840  
 Kurpesa, M., P3064, 5015  
 Kurpisz, M., P484, P3874  
 Kurtinecz, M., P2132  
 Kurtz, F., P4869  
 Kurylowicz, A., P3925  
 Kurz, K., P1415  
 Kurz, T., P3375  
 Kurzyna, M., 5183  
 Kusachi, S., P3934, P4934, 5005  
 Kusano, K., P3934, P4934, 5005  
 Kusano, K.F., P1514  
 Kuschyk, J., P1664, P1669, P3289, P3293, 5123  
 Kusmierczyk, B., P1567, P3274, P4125  
 Kussebi, R., P3055  
 Kusunose, K., P1558, P4538, 4957  
 Kusunose, M., P488  
 Kusuyama, T., P2196  
 Kutarski, A., P2360, P2361, P4171  
 Kutuyifa, V., P5615  
 Kuukasjarvi, P., P5430  
 Kuulasmaa, K., 984  
 Kuusisto, J., P3388  
 Kuwabara, Y., P5322, 5001  
 Kuzmin, V., P4511  
 Kuznetsov, V., P1276  
 Kuznetsova, I., P679  
 Kuznetsova, T., 163, P542, P3940  
 Kuzniec, J., P2391  
 Kvasnak, M.K., 2924  
 Kvasnicka, J., 4990  
 Kvien, T.K., P1481, P1732, P4617  
 Kwak, B.R., P3398, 5139  
 Kwan, J.U.N., P5323  
 Kwasniewski, W., P1661, P2458  
 Kweon, H.-J., P5483  
 Kwiecien-Sobstel, A., P477  
 Kwok, B., P833  
 Kwon, J.S., P543, P3093  
 Kwon, Y.S., P1380  
 Kyllintreas, I., P617, P3988, P4542  
 Kyndt, F., 5122  
 Kyriakakis, E., 1249, P2202, P3945, P4615  
 Kyriazis, I., P3268  
 Kyrkou, K., P4944, P5446  
 Kyridis, T., P2513  
 Kyrzopoulos, S., 2868  
 Kyvelou, S.-M., P867, P2527  
  
 L'Abbate, A., P537, 1106, P2475, P3237  
 L'Huillier, I., P5316  
 La Boria, E., P549  
 La Carrubba, S., P585, P2174  
 La Gerche, A., P1591, P4695, 4974  
 La Manna, A., P3174, P3178  
 La Manna, A.G., P1510, P4033  
 La Rovere, M.T., P4232, P5681, P5702  
 La Vecchia, L., P450, P4085  
 Laakso, M., P3388  
 Laaksonen, D.E., P4006  
 Laaksonen, R., P5414  
 Laali, M., P516  
 Laanmets, P., P2115  
 Laarman, G.J., P4705  
 Laatikainen, T., 129, P5458  
 Labanti, G., P3838  
 Labecka, A., P609  
 Lablanche, J.M., P631  
 Labro, S., 3530  
 Labyk, A., P707, P747  
 Lacapere, J.J., P1384  
 Lacchini, S., P2484  
 Lach, J., P2528  
  
 Lachmann, H.J., 5057  
 Lackner, K.J., P1294, P1476, P3120  
 Laclaustra, M., P1473  
 Lacombe, P., 5074  
 Lacroix, D., P3336  
 Lada, M., 1259  
 Ladage, D., P1692  
 Ladd, M.E., P3026  
 Ladeira, R.T., P3005  
 Ladeiras-Lopes, R., P3358  
 Ladouceur, M., P2081  
 Ladwig, K.H., P4845  
 Lafitte, M., P2961, P3127  
 Lafitte, S., P2141, P4787  
 Lafolie, I., P1341  
 Laforet, P., P3276  
 Lafuente, J., 1114  
 Lafuente, M., 2000  
 Lage, R.L., P1436  
 Lagerche, A., 5091  
 Lagerqvist, B., P640, P648, P3135, P3144, P3223  
 Lago, M.F., P1399  
 Lago, N., P850  
 Lagoeiro Jorge, A.J., P1709, P4898  
 Lagou, S., 126, P792  
 Lagrand, W.K., 5204  
 Laguens, R., P4621  
 Lahidheb, D., P4042  
 Lahl, K., P4590  
 Lahm, H., P4637  
 Lahtela, H., P2438  
 Lahtinen, P., 3644  
 Lai, H., P1670  
 Lai, R.C., 2018  
 Lai, W.H., P3339  
 Lai, W.T., 339  
 Laidinen, S., P2192, P2203, P5391  
 Lailerd, N., P4680  
 Lairakdomrong, K., P2351  
 Lairez, O., P3828, P3835, P4251, P5630  
 Laissy, J.P., P4099  
 Laitinen, J., P5391  
 Laitinen, T., P4006  
 Lajkowski, Z., P2116  
 Lakkireddy, D., P1620, 3652  
 Lakkis, N., 2045, P2146  
 Lalande, A., P1373, P3847  
 Lallemand, F., P2510  
 Lam, L., P5687  
 Lam, Y.Y., P499, P4808  
 Lamantia, G., P2479  
 Lamar, A., P2155  
 Lamare, F., 390  
 Lamas, G., P4202  
 Lamas, G.A., P3853  
 Lamb, H.J., P2186  
 Lambeau, G., 5109  
 Lambert, P.C., P5306  
 Lamblin, N., P1568  
 Lambrechts, D., 153, 888, P3913  
 Lambropoulos, M., P635  
 Lambropoulou, M., P878, P4933  
 Lamego, I., P3383  
 Lamendola, P., P4001, P4578  
 Lami, E., P1355  
 Lamirault, G., P4849  
 Lamotte, M., P1470  
 Lampert, E., P2328  
 Lamprinoudaki, I., P5446  
 Lampropoulos, K., P5351  
 Lampropoulos, K.M., P5341, P5345, P5490  
 Lanas, A., P2095  
 Lancefield, T., 2647  
 Lancelin, B., P2316  
 Lancellotti, P., P2399, 2864, P4093, 5162, P5326, P5333, P5335, P5336  
 Lande, G., P4849  
 Landesberg, A., P5380, P5401  
 Landeta, F., 1912, P2468, P3021  
 Landi, P., P3833  
 Landini, L., P3028, P4550  
 Landivier, A., P5276  
 Landmesser, U., 387, 399, P2077, P2107, 2913, P3033, P5420  
  
 Landolina, M., P1658, 1899, 5104, P5641  
 Landsberger, M., P4248  
 Lane, D., P5495  
 Lane, D.A., P630, 3650  
 Lanero, S., P5527  
 Lanfranchi, P., P705  
 Lang, A., 5218, P5647  
 Lang, A.L., P1676, P3392  
 Lang, C.C., P429, 2815, P4518  
 Lang, I.-M., P715  
 Lang, I.M., P713, P717, P724, P1613, 1901, P2101, P3409, 5177, P5282, P5568  
 Lang, K., P797  
 Lang, R.M., P2143, P2181, 5092  
 Lang, S., P2977, P4190, P4257, P4870  
 Lang, S.L., P4145  
 Langbein, A., P4829  
 Lange, C., 2648  
 Lange, N., P3072  
 Lange, R., P4126, P4637  
 Lange, S.A., P1704  
 Lange, U., P2106  
 Lange, V., P3796  
 Lange, V.L., 2861, P4105  
 Langella, G., P3061, P3076  
 Langer, C., P1675, P3307, P4909  
 Langer, E., P2099  
 Langer, H., P3096, P5311  
 Langer, H.F., P4613  
 Langer, M., 5187  
 Langhorne, P., 150, P5523  
 Langin, D., P1416  
 Langlard, J.M., P2347  
 Lankisch, M., P4902  
 Lanocha, M., P3964  
 Lanotte, S., P3191, P4047, P4710  
 Lanska, V., P5494  
 Lansky, A.J., P645, 1957, 5210  
 Lantouraki, A., P4208  
 Lanza, G.A., P597, P2207, P2226, 2776, P4001, P4526, P4578  
 Laothamatas, J., P4655  
 Laoutaris, I.D., P2947  
 Lapin, B.R., P2394  
 Laporte, S., P698  
 Lara, S., P763  
 Laramee, J., P603  
 Lardieri, G., P3264  
 Lardo, A.C., P1338, P5629  
 Larina, O., P4544  
 Lario, F.C., P4748  
 Larionov, P., P3091, P3097  
 Larionova, V., P3267  
 Larman, M., 2926  
 Larmann, J., 1244  
 Larosa, J.C., P3943  
 Larose, E., 1251, P3092, P3187, P4742  
 Larrazet, F., P4166  
 Larsen, C.T., P4122  
 Larsen, S.B., P1322  
 Larsen, T.S., P3884  
 Larsson, B., P1681  
 Larsson, P., P5411  
 Larstorp, A.C., P866  
 Lasala, G., P3069, P4504  
 Lasica, R., P427, P443, P444, 5208, P5269  
 Laskar, S.R., P4222  
 Laskin, C., P5554  
 Laskowicz, B., 1259  
 Lasota, B., P5321  
 Lassen, J.F., P650, P4050, P4720, 5146, P5286, P5290  
 Lassner, D., P1699  
 Lassnig, E., P1722  
 Lassus, J., 5075  
 Lassus, J.P.E., 2764  
 Laszlo, R., P555, P574, P1633, P2452  
 Latcu, D.G., P769  
 Laterza, M.C., P1436, P4699  
 Lathourakis, V., P3886  
 Latib, A., P1544, P2087, P3176  
 Latini, R., 240, 1099, 1104, 1105, P1719, P2495, 5085, P5680  
 Latini, R.A., P3191, P4047, P4710

- Latour, C.H., P5513  
 Latsios, G., 1023, P4143  
 Latz, W., P472, 3771  
 Lau, C.P., P478, P800, P808, P1482, P3153, P3339, P4672, 4968  
 Lau, C.S., P4556, P4565  
 Lau, D., 1920, P3313  
 Lau, D.H., P2426, P2443, P3341, P5560  
 Laucevicius, A., P3999  
 Lauciello, R., P519  
 Laudadio, M.T., 5222  
 Laudisa, M.L., P3191, P4047, P4710  
 Lauersen, H.B., P4774  
 Laufer, E.M., P3012, P5468, P5469  
 Laufer, G., P2344, 5241  
 Laufs, U., P568, P2266, P3083, 3658, P3967, P4600, P4631, 4971, P5373  
 Lauque, D., P1291  
 Laurent, F., P4787  
 Laurent, S., 1017  
 Laurenzano, E., P5527, P5534  
 Lauri, G., P3184  
 Lauten, A., P2345, P2449  
 Lauzier, B., P1397  
 Lavecchia, L., P5267  
 Lavi, I., P1507, P4061, P4068  
 Lavi, T., P1475  
 Lavoie-L'allier, P., P2131  
 Law, I.H., P776  
 Lawrenz, T., 342  
 Lawson, J.A., P5440  
 Lawson, W., P4519  
 Laynez, A., P4540  
 Layton, D.M., P1576  
 Layton, M., P512  
 Layug, E., P3295  
 Lazarevic, A., P3116  
 Lazarro, P., P439  
 Lazaros, G., 162, P449, P1292, P3919, P3973, P5298, P5587  
 Lazarus, A., P1648, P3276  
 Lazdam, M., P617, P3988  
 Lazewatsky, J., 398  
 Lazzari, P., P1737  
 Lazzarini, G., P4596  
 Le Conte, P., P3831  
 Le Corvoisier, P., P3369  
 Le Dret, S., 5069  
 Le Feuvre, C., P1469, P4716  
 Le Gac, C., P2517  
 Le Gal, G., P2074, P5625  
 Le Guludec, D., P1469, P5573  
 Le Heuzey, J.Y., P4852  
 Le Jeune, S., P4849  
 Le Marec, H., P570, 5120, 5122, P5551  
 Le Scouarnec, S., 5122  
 Le Tourneau, T., P1568, P5564  
 Leal, P., P1465  
 Leal, S., P5357  
 Leal, S.R.N., P3888  
 Leano, R., 2046, P4908, P4924  
 Leao, M.I.P., 1925  
 Lear, P.V., P1399  
 Lebedev, D., P4821, P4850, P4872  
 Leblanc, M.-H., P1720  
 Lebreton, H., P3852  
 Lechat, P., P2477, P2485  
 Leci, E., P722, P1571, P1598, 5172  
 Leclaire, S., 5099  
 Leclercq, C., 233, P2141, 5062, 5063, P5616  
 Leclercq, F., P5586  
 Lecoat, A., 1112  
 Lecour, S., P4486  
 Ledain, L., P436, P2121  
 Ledesma, C., P1652, P1654, P2456, P2472, P3297  
 Ledolley, Y., P5635  
 Leduc, L., P4685  
 Ledwidge, M., P2516, P2537, 5047  
 Lee, B., P3116, P5478  
 Lee, B.C., P3390  
 Lee, C.-H., P3883, P5374  
 Lee, C.-W., P3198  
 Lee, C.H., P4724  
 Lee, C.N., 2018  
 Lee, C.W., P1472, 4952  
 Lee, D.W., P1457  
 Lee, E., 166, P1714, P3346, P3850, P4891, P4901  
 Lee, F.Y., P3100  
 Lee, G., 124, P4877  
 Lee, H.G., P1457  
 Lee, J., P2519  
 Lee, J.-K., P2229, P2261  
 Lee, J.B., P5410  
 Lee, J.H., P420, P4533, P4676, P5266, P5323, P5370, P5415  
 Lee, J.W., P2091, 3558  
 Lee, J.Y., 4952  
 Lee, K., P800, P808  
 Lee, K.H., P2091, 2673, 3558, P4648, P4651  
 Lee, K.M.G., P5459  
 Lee, K.W., P687  
 Lee, L.C., P5459  
 Lee, L.M.Y., 5106  
 Lee, M.G., 3560, P4152, 4988  
 Lee, N.H., P4466  
 Lee, N.S., P2091, 2673, 3558, P4648, P4651  
 Lee, P.W., P499  
 Lee, S., 1250, P1335, P1336, P1482, P4672, 4968  
 Lee, S.-D., P5594  
 Lee, S.-G., P523, P5592  
 Lee, S.-W., P3198  
 Lee, S.C., P4118  
 Lee, S.H., 1096, P2091, P2172, 2673, P4648, P4651, P5354  
 Lee, S.W., 3558, 4952  
 Lee, T., P1367, P3015, P4070  
 Lee, W.H., P5323  
 Lee, Y.-T., P2229, P2261  
 Lee, Y.K., P3339  
 Lee, Y.P., P4724  
 Lee, Y.S., P5410  
 Lee, Y.T., 339  
 Lee-Rueckert, M., P5565  
 Leeman, M., 1016, P3147  
 Leenders, G.E., P5646  
 Leenhardt, A., P570, P3336  
 Leenhouts, L., P4004, P5431  
 Leeson, P., P617, P2311, P3988  
 Lefevre, C., 5003  
 Lefevre, T., 4991  
 Lefkovits, L., 4951  
 Lefrancois, Y., P3314  
 Lefterova, N.P., P855  
 Leftheriotis, D., P792, P2230  
 Legeai, C., P624  
 Leger, J., P4849  
 Leggewie, S., 5116  
 Legutko, J., P683, 4955  
 Lehmann, D., 288  
 Lehmann, R., P1675, P4226, P5693  
 Lehmkühl, H., P489  
 Lehmkühl, H.B., 1005, 1208, P1525, P1581, P1685  
 Lehn, K., 3655  
 Leiball, E., P602, P2184  
 Leiber, F., P4593  
 Leibetseder, V., P3409  
 Leibig, M., P2332  
 Leibundgut, G., P740, P3304, 5084, P5289  
 Leiner, T., P3012  
 Leisch, F., P4032  
 Leiss, M., 2912  
 Leitao, A., P4853  
 Leite, D., P3024  
 Leite-Moreira, A., P3358, P4895  
 Leite-Moreira, A.F., P411, P741, P818, P837, P1593, P3383  
 Leiter, L., P2254  
 Leitinger, G., 1242  
 Leitman, M., P5360  
 Leizorovicz, A., P4536  
 Leizorowicz, A., 1955, P2118  
 Lekakis, J., P1487, P1663, P2169, P2220, P2241, P2540, P3106, P5251, P5348, P5393, P5502  
 Lekston, A., P474, P870, 1147, P3143, P5278, P5288, P5293, P5307, P5309  
 Lellouche, N., P4158  
 Lelonek, M., P2410  
 Lemaire, J., 5007  
 Leman, R., 238  
 Lemay, M., P3043  
 Lemdersi-Filali, M., P1645  
 Lemesle, G., 2681  
 Lemiale, V., P3809, P3810  
 Lemke, B., P5706  
 Lemmens, K., 2919, 2922  
 Lemmert, M.E., P2981  
 Lemogoum, D., 1016, P3147  
 Lemoigne, F., P743  
 Lemoine, S., P508, P2329  
 Lemos, P.A., 2934  
 Lenarczyk, R., P440, P659, 1147, P3230  
 Lendeckel, U., P4186  
 Lenderink, T., P5464  
 Lendlein, A., P3088, P3095  
 Lengyel, M., P2415, P4925  
 Lenk, K., P1677  
 Lentini, S., P1577  
 Lentzas, J., 1014, P1486, P3126, P3981, P4692  
 Lenze, F., P4833  
 Lenzen, M.J., P5526  
 Leo, M., P3834  
 Leon, C., P2090, P2306  
 Leon, K., P2500  
 Leon, M., 883, 5196  
 Leon, V., P459  
 Leon Del Pino, M.C., P2305  
 Leonardi, S., P515, P3860  
 Leone, A.M., P662, 1155  
 Leone, O., P5347  
 Leone, R., P5487  
 Leonelli, V., P3348  
 Leong, D., 1920  
 Leong, G., P833  
 Leoni, L., 1115, P3261  
 Leontiadis, E., P2149  
 Leopizzi, M., P4744  
 Leopold, A., P2393  
 Leosco, D., P819, P4719  
 Leow, K.L., P833  
 Lepage, L., 2006, P2413  
 Leppanen, O., P2192  
 Lepper, P.M., P1614  
 LePrince, P., P516  
 Lerch, R., P556, P1398, P3241  
 Leren, T.P., 1116  
 Lerman, A., 1128  
 Lerman, L., 1128  
 Leroux, P.Y., P1587  
 Leroy, L., 1112  
 Lertsapcharoen, P., P2351  
 Lesce, A., P3860  
 Leshem, D., P649  
 Lesiak, M., P3196, P3964  
 Leskinen, H., P1417, P1430, P3376, 3773  
 Lesman-Leegte, I., P3154  
 Lesniak-Sobelga, A., P5504, P5510  
 Lesniak-Sobelga, A.M., P5328  
 Lestuzzi, C., P1263, P1694, P3259, 5230  
 Letourneau, T., P2204  
 Lettesjo, H., P4658, P4661  
 Lettieri, C., P1551, P2094, P4532  
 Lettiero, T., P2240  
 Lettino, M., P3222, P3860  
 Letulle, S., P3369  
 Leu, H.B., P4529  
 Leucker, T., P5483  
 Leuner, C., 342  
 Leung, D.Y., 2044, P2139, P2186  
 Leung, M.C., 1261, P1349, P1374, P5308  
 Leung, T., P4685  
 Leung, T.K., P2499  
 Laurent, B., P4059  
 Leurs, I., P1718, P2521  
 Leuzzi, C., P1713, P5657  
 Lev, E., P649, P667, P2407, P5277  
 Lev, E.I., P4061  
 Levantesi, G., 134, P412, P2518, P4206  
 Levenson, B., P4706  
 Levine, R.A., P2395  
 Levitt, J., P726  
 Levkau, B., P563  
 Levy, P., P5686

- Lewalter, T., P563, P2444, P4836  
Lewandowski, M., P1668, P3262  
Lewandowski, P., P5521  
Leweling, H., P3364  
Lewicka-Nowak, E., P4171  
Lewin, R.J.P., 5008  
Lewinter, C., P4214, P4894  
Lewis, A.L., P3062  
Lewis, W., P2448  
Lewsey, J.D., 150, 240, P5523  
Leyendecker, T., P2215  
Leyva, F., P1714, P3346, P4249, P4880, P4891, P4901, P5643  
Lezaic, L., P5692  
Lhotska, L., 5220  
Li, C.M., P499, P4503  
Li, F., P5718  
Li, G., P3328, 5105  
Li, H., P3957, P4675  
Li, J., P1393, 2921, 5105  
Li, J.B., P1393  
Li, L., P5515  
Li, Q., P1570  
Li, R., P3095  
Li, R.J., P664, P2984, P3393  
Li, R.K., P3088  
Li, S.W., P1482, P3153, 4968  
Li, W., P503, P2386, P3088, P3095, P3397, P4785, P4803  
Li, X., P1302  
Li, Y., P2483, P3954  
Li, Y.-H., P2195, P5374  
Li Volsi, L., P5520  
Liakos, C., P4907, P5711  
Liakos, G., P3208  
Liane, L., P4825  
Liang, C., 3647  
Liao, J.-K., P5374  
Liao, J.K., P2984, P3393  
Liao, Y., 152  
Liasidis, C., P1324  
Liau, C.S., P3141  
Libby, P., 899, P5375  
Libertazzi, A., P2150  
Libhaber, E., 341, 2769  
Lichodziejewska, B., P747  
Lichtenberg, A., P2308, P3079  
Licina, M., P3117  
Licio, F.V., P1709, P4898  
Licitra, R., P2354  
Lickfett, L., P2423, P2444  
Lickfett, L.M., P563  
Lieb, W., P3976, P4656  
Liebtrau, C., 282, 1961  
Liebtrau, C.L., 2928  
Lieder, F., 342  
Liehn, E., P1385  
Liehn, E.A., P3063  
Liem, S.S., P1506, P3224, P4082, 4956  
Lienard, J., P4083  
Liepold, E., 3538, P3974  
Lieu, H.D., P2490  
Liew, D., 979, 986  
Liew, G., P1374  
Liew, G.W.H., P5308  
Liew, G.Y.H., P1349  
Liew, H.B., P3109, P4539  
Liew, R., 5216, P5427  
Liferov, R.A., P2302  
Ligabue, G., P4571  
Lighart, J., 4954  
Lighezan, D., P414  
Light, B., P3816  
Lighthart, J., 897, P1509, P4046, P4073, P4077, 4983  
Liguori, A., P4623  
Lilli, A., P519  
Lim, C.C.S., 5070  
Lim, G.B.S., 1239  
Lim, H., 1920  
Lim, H.S., P1380, P1553, P2464, P4016  
Lim, P., P2977, P3887, 5162, P5630  
Lim, S.K., 2018, 5227  
Lim, S.L., P5459  
Lim, T.K., P496  
Lim, Y.P., P447  
Lim, Y.T., P4724, P5459  
Lima, A.R.R., P1696, P1702, P1708  
Lima, C.E.B., 1925  
Lima, E.G., P534, P538, P2069, P2071, P2318, P3158, 5189, 5191, P5480  
Lima, F.F., P2999  
Lima, F.G., 1150, P3005  
Lima, J.A.C., P3030  
Lima, M., P4019, P4906  
Lima, R., P4915  
Lima, S., P1456, 1960  
Limbourg, A., 1244  
Limbourg, F.P., 1244  
Limbourg, T., 156, P629, P2293, 3651, P4836, P4841, P5436  
Limbruno, U., P4759  
Limongelli, G., P3248  
Lin, C.-C., P3883  
Lin, J., P2254  
Lin, J.W., P4150  
Lin, L.-J., P5374  
Lin, S.J., P4529  
Lin, T.H., 339  
Lin, Y., P760, P2420  
Lin, Z., P1631  
Lina, D., P540  
Lincoff, A.M., 1957, P3846, P3850, P5294  
Lindahl, B., 286, 1148  
Lindahl, C., P2245  
Lindberg, M., 1100, P5685, P5701  
Lindblad, B., 154  
Lindbom, M., 5050  
Linde, C., 237, 238  
Linde, P., 2784  
Linde, T., P2408  
Lindemann, S., P3096, P4867, P5311  
Linden, M.A., P3991  
Lindgren, F., P501, 5166  
Lindholm, C., P3370  
Lindholt, J.S., P5531  
Lindner, H., P4605  
Lindner, J., P720  
Lindqvist, P., P2176  
Lindsay, J., 2681  
Lindstaedt, M., P1530, P4040  
Linhardt, M., P2423  
Linhart, A., P522, P720, P1729, P4227  
Linhart, M., P563  
Linhartova, K., P3283  
Link, R., P5257  
Linke, A., P1411, P1677, P2480, P2944, P2950, P2951, 3528, P4755, 4963, 4964, 4966  
Linkova, H., P2402  
Linneberg, A., P3800, P5455  
Linnemeier, G., P4519  
Linnenbank, A.C., P2441  
Linqvist, P., P503  
Lionetti, V., P1712, P2264, P3360, P4508  
Lionis, C., 3539  
Liontou, C., P468, P4217  
Liotino, M., P4215, P4247  
Lioy, E., P4146, P4151, P4826, 5222  
Lip, G.Y., P657, P4858  
Lip, G.Y.H., P630, P1504, P2424, P3339, P3355, 3650, P4851, 5152, P5495, P5532  
Lipari, P., P5477  
Lipczynska, M., 2766  
Lipiec, P., P484, P1293, P1297, P3874  
Lipiecki, J., P2967, P4729  
Lipinski, M., P809  
Lipinski, W., P1433  
Lipponen, J., P3388, P5389  
Lipton, J.A., 5012  
Lisa, L., P791, P2402  
Lishner, M., P5451  
Lisi, M., P1490, P4470  
Lisignoli, V., P3217  
Lisy, O., 3774  
Little, B.B., P653  
Little, W.C., 5049  
Litzler, P.-Y., P5260, P5262  
Liu, C.W.Y., P5459  
Liu, E., 5105  
Liu, H., P3148  
Liu, J., P5356  
Liu, J.H., P1730  
Liu, L., P475  
Liu, M., P5305  
Liu, M.Y., P1393  
Liu, P.-Y., P2195, P5374  
Liu, S.H., P3203  
Liu, S.L., P5718  
Liu, S.T., 5086  
Liu, T., P3328, 5051  
Liu, Y., P2123, P4052, P4081  
Liu, Y.-L., P5356  
Liu, Y.-W., P3883  
Liu, Y.L., P651  
Liu, Z., P1730, P5572, P5583  
Liuni, A., P1731  
Liuzzo, G., P461, P1271, P4861  
Livieratos, T., P1471  
Livingstone, D.E., P4597  
Ljubas, J., P2340  
Llacer, A., P430, P1275, 3567, P4725, 5112  
Llach, A., P564, P578, 1240  
Llano, M., P1422, 2920  
Llano Cardenal, M.F., P841  
Llaurado, C., P1501  
Lleshi, A., P3259  
Llibre Pallares, C., P4089  
Llorente-Cortes, V., P4604  
Lloyd, G., P4513  
Lloyd, G.W., 248, 250  
Lober, J., 1123  
Lobo, M., P2545  
Lobysheva, I., P3959  
Locca, D., P1271, P3174, P3178  
Lochen, M.L., 3776, P5426  
Lock, J., P4700  
Lockie, T., P680  
Loddenkemper, C., P3212, P3794  
Loeffler, D., 1128  
Loeffler, M., P1269  
Loefgren, B., P4490  
Loegstrup, B.B., P2171  
Loewen, M.E., 3780  
Loeys, B., P5545  
Loeys, B.L., P5543  
Lofgren, B., 5142  
Loganathan, S., P545, P2324  
Logeart, D., P3813  
Logohetis, E., P4933  
Logothetis, E., P878  
Loh, Y.J., P447  
Lohmann, C., 378, P4593, P4609  
Lohmann, T., P2997  
Lohse, M.J., P1569, P4882, 5231  
Loibner, H., P4497  
Loirand, G., P4056  
Lois, K., P2210  
Loke, I., P2460, P5612, P5619  
Loma-Osorio, A., P3854  
Loma-Osorio, P., P3854  
Lombardi, C., P1427, P3042, P5694  
Lombardi, D., P1694, P3259  
Lombardi, M., P822, P827, 1253, 1255, P1371, P1597, P2080, P3028, P3360, P4543, P4549, P4550, P4553, P4879  
Lommi, J.I., P5565  
Lomsky, M., 5168  
Lonati, L., P3402  
Loncar, S., P3116  
Loncaric, S., P3796  
Loneragan, M., P5470  
Long, L., 1914  
Long Thanh, L., P4820  
Longhi, S., 344, P3236, P3239  
Longobardi, A., P5487  
Longobardi, G., P590  
Longoni, P., P3131  
Longordo, C., P4473  
Lonnebakken, M.T., P863  
Lonnerholm, S., P5696  
Lopatin, Y.M., 2783  
Loperfido, F., 5077

- Lopes, L.R., P2403  
 Lopes, M., P736  
 Lopes, M.G., P746, P3270, P4579  
 Lopes, N., P458, P3158  
 Lopes, N.H., P534, P538, P2069, P2071, P2318, 5189, 5191, 5238, P5480  
 Lopes, R., P802, P4895, P5595  
 Lopes Carvalho, J., 1107  
 Lopes-Conceicao, L., P411  
 Lopez, J., P4113, P4114, P4115, P4117, P4120  
 Lopez, J.A., P3263  
 Lopez, M.F., 1953  
 Lopez, V., P5478  
 Lopez De Sa, E., 289  
 Lopez Diaz, J., P3795  
 Lopez Granados, A., 1951, P2306  
 Lopez Palop, R., 2926  
 Lopez Sendon, J.L., P2477, P3299  
 Lopez-Conesa, E., P5584  
 Lopez-Lereu, M.P., P430, 3567, 5112  
 Lopez-Meseguer, M., P504, P731, P1572  
 Lopez-Sendon, J., 5049  
 Lopez-Sendon, J.L., 289  
 Lorenzo, C., P3832  
 Lorenzi-Filho, G., P4025  
 Lorenzini, M., P3236  
 Lorenzo, L., P5454  
 Lorenzo, O., P3263  
 Lorenzo Menicanti, L.M., 3645  
 Lorenzon, A., P3233, P3250  
 Lorenzoni, V., P3833  
 Lorgis, L., 1950, P3847, P3859, P5316  
 Loriz, H., P5483  
 Lortkipanidze, N., P1551, P2094, P4532  
 Losi, P., P2199, P2201  
 Lossie, J., P3240  
 Lossnitzer, D., P1586  
 Loster, M., P2269  
 Lotan, C., P4236, P4246  
 Lotfi-Tokaldany, M., P490  
 Lotrionte, M., 5077  
 Lotze, U., P797, P3287  
 Louboutin, S., P3353  
 Louedec, L., P5573  
 Louis, P., P1645  
 Loukogeorgakis, S.P., P4507  
 Loukopoulou, S.L., P2373, P2378  
 Loureiro, J.R., P1465  
 Loureiro, P., P736  
 Lourenco, A., P1593  
 Lourenco, C., P426, P428, P439, P2974, P3827, P4225, P4537, P4904  
 Lourenco, M., P734, 2677  
 Lourenco, P., P5595  
 Lousberg, A., P4528  
 Lousinha, A., P421, P614, P2939  
 Love, C., P839, P1656, 1909  
 Love, T.E., 5045  
 Lovell, C., P2287  
 Lovric, D., P1308  
 Low, A., P4724  
 Low, R., P4132  
 Lowdell, M., P1327  
 Lowe, H., P677  
 Lownie, S.P., 290  
 Lozano, I., 237, P2481, P3129, 5063  
 Lozano, I.F., 5062  
 Lozano, J.V., P2272  
 Lozano, T., P864  
 Lozano Martinez-Luengas, I.L., P4731  
 Lu, C., P4055  
 Lu, K., P5572, P5583  
 Lu, S.-C., P2229, P2261  
 Lualdi, A., 5071, P5511  
 Lubanda, J.-C., P522  
 Lubiszewska, B., P637  
 Lubos, E., P1294, P1476, P3120  
 Luca, M., P1731  
 Lucas, E., 5080  
 Lucca, J., P809  
 Lucchesi, D., P1458, P3949  
 Lucci, D., P4204  
 Lucchessi, E., P4732  
 Luchner, A., P3976, P4656  
 Luciani, G.B., P4806  
 Luciano, R., P5527  
 Lucibello, S., 5104  
 Luckie, M., P2366  
 Luczak, K., P422  
 Ludanyi, A., P3115  
 Ludman, A., 3647  
 Ludwig, A., P4599  
 Luecke, M., P2418  
 Luedde, M., P3234  
 Luengo, E., 883  
 Luermans, J.G., P4804  
 Luescher, T.F., 378, 384, P2077, P2107, 2913, P3094, P3944, P3947, P4593, P4609, P5385, P5386, P5604  
 Luesebrink, U., P849  
 Luethje, L., P4905  
 Luetzow, K., P3088  
 Luft, F.C., P406  
 Lugano, R., P5416  
 Luha, O., P5324  
 Luijendijk, P., 2001  
 Luijckx, T., 4976  
 Luisi, S.V., P5547  
 Luk, T.H., P478, P1482, 4968  
 Lukac, P., P1639  
 Lukas, W., 983  
 Lukashevich, V., P2542  
 Luki, J., 3649, P3879  
 Lunati, M., P1649, P1658, 1899  
 Lund, B.P., P865  
 Lund, J., P4122  
 Lund Nilsen, T.I., P3803  
 Lundberg, J.O., P4484  
 Lunde, I.G., P1438  
 Lunde, K., P498, 5224  
 Lundman, P., P3136  
 Lundorf, E., P4816  
 Lupinek, P., P3905  
 Lupoglazoff, J.E.A.N.M., P570  
 Lupon, J., P1721, P3167, P4219, P4231  
 Luscher, T., P5420  
 Luscher, T.F., 387, P5418  
 Lutay, Y.A., P2135  
 Luthardt, E., P2145  
 Lutitsky, N., 2680  
 Lutjohann, D., P4631  
 Lutter, G., P4127  
 Lutz, M., P1586  
 Luycx-Bore, A., 2869  
 Ly, H.Q., P2131  
 Lykasova, E., P1276  
 Lykka, M., P4944, P5446  
 Lykouras, E., P5668  
 Lympieriadis, D., 5136  
 Lympieropoulos, A., P819  
 Lyne, J., 1254  
 Lyne, J.C., P767  
 Lyngbaek, S., P5455  
 Lyon, A., P4487  
 Lyon, L.L., P4167  
 Lyons, J., 4953  
 Lysiansky, M., P5360  
 Lysyansky, P., P5360  
 Lytwyn, M., P494  
 Lyrra-Laitinen, T., P4006  
 M, C., P4257  
 M Barbosa, M.M., P847  
 M Nia, A., P5448  
 M'buyamba, J.R., 1016  
 Ma, A., 152  
 Ma, J., P1534  
 Ma, L.-P., P3370  
 Ma, L.P., P4237  
 Ma, N., P3088, P3095  
 Ma, X.J., P4503, P4739  
 Maack, C., 5051  
 Maagh, P., P765  
 Maan, A.C., P4791  
 Maas, O., P1388  
 Maass, A.H., 235, P1413, 2921, P5607, P5614  
 Maatouk, F., P2991  
 Maazoun, Y., P4121  
 Mabo, P., P3336, 5120, 5122, P5551, P5616  
 Macallister, R.J., P4507  
 Macarie, C., P2092  
 Macaya, C., P491, P492, P566, P1316, P1508, P1543, P2304, P2397, P2401, P3039, P4183, P4563, P4737, 4958, P5329  
 Maccarthy, P., P4135  
 Maccherini, M., P5347  
 Macchi, A., 5056  
 Macchione, A., 2776  
 Maccubbin, D., P1733  
 Macedo, A.H., 2015  
 Maceira, A., P4551  
 Maceira Gonzalez, A.M., P4773, P5398  
 Macfadyen, R.J., P3355  
 Macfarlane, P.W., 2782  
 Macfelda, K., P2322  
 Mach, F., P3398, 5139  
 Machado, R.F., P1602  
 Machado, S., P5586  
 Machalinski, B., P3068  
 Machaliza, K., P4690  
 Machecourt, J., P1492, P2121  
 Machino, T., P838, P1625, P3908, P5649, P5652  
 Machler, H., P552  
 Maciag, A., P609, P1668, P3262  
 Maciejewski, M., P2410, P2505  
 Maciejewski, P., P5521  
 Maciel, B.C., P3278  
 Maciel, M.J., P802, P4895, P5595  
 Macin, S.M., P4223  
 Macinnes, I.B., P821  
 Macintyre, K., 150, P5523  
 Maciorkowska, D., P663  
 Macisaac, A., P1591, 5091  
 Macisaac, A.I., 4974  
 Maciver, D.H., P2404  
 Mackens, V., P3840  
 Mackworth-Young, C., P5420  
 Macle, L., P805, 3660  
 Maclean, A., P1733  
 Macleod, R., P4819  
 Macleod, R.S., P1638, P4831  
 Macrino, M., P3896  
 Maczynska-Mazuruk, R., P1567, P3262, P3274  
 Madan, P., P5483  
 Madani, H., P2085  
 Madaras, S.Z., P2132  
 Maddahi, J., 398  
 Maddalena, F., P3173  
 Maddalozzo, A., P584, 1003, P2948  
 Madeddu, C., P2507  
 Madej, A., P1562  
 Maden, O., P873, P3980  
 Madhusudhan, P., P5522  
 Madonna, R., P464, P3175, P4596  
 Madsen, J.K., P1556, P2114, P2117, P2942, 5206  
 Madsen, M., P650, 1826, P2114, P2117, P2942, P3170  
 Maechler, H., 1242, P3347, P3825  
 Maegdefessel, L., P2408  
 Maehama, T., P1537, 4986  
 Maehler, A., P1679  
 Maekawa, J., P437  
 Maekawa, S., P626  
 Maekawa, Y., P2964, P3183, P4499, 5143  
 Maemura, K., 1146, P1452, P4012  
 Maenaka, M., P3871  
 Maeng, M., P650, P4720  
 Maeno, Y., 2007, P2362  
 Maerz, W., P528  
 Maessen, J.G., P3294  
 Maestri, R., P4232, P5681  
 Maestroni, A., 151  
 Maeuser, W., P4869, P5621, P5690  
 Maffei, E., P1352  
 Magagna, A., P3414  
 Magalhaes, C.C., P2263  
 Magalhaes, M.P., 5236  
 Magalhaes, S., 5213  
 Magazzini, S., 236, P714  
 Magda, L.S., 335  
 Mager, A., P649, 5205  
 Mager, J.J., P725, P737

- Mager, Y.L., P4764  
 Magera, A., 1245, P2198, P2201  
 Magga, J., 5075  
 Maggioni, A.P., 134, 240, P412, 981, 1099, 1104, 1105, P2495, P2518, P4000, P4204, P4206, 5085, P5680  
 Magliano, D., 979, 986  
 Magne, J., P2399, 2864, P4093, P5326, P5333, P5335, P5336  
 Magni, V., P4128  
 Magnin-Poull, I., 5213  
 Magno, P., P1465  
 Magro, M., P1607, P5330  
 Magyar, A., P3309  
 Magyar, K., P1418  
 Magyarlaki, T., P1317  
 Mahadevan, V., P1554  
 Mahadevan, V.S., P2366  
 Mahaffey, K., P4198  
 Mahata, S., P2189  
 Mahe, I., P3369  
 Maher, A.R., P1561  
 Maher, V., P848  
 Mahia, P., 1007, P5355  
 Mahia, P.M., 1008  
 Mahia Casado, P., P4089  
 Mahjoub, M., P1326  
 Mahl, E., P3289, P3293  
 Mahla, E., P681  
 Mahmood, I., P3202  
 Mahnken, A., P3056  
 Mahnken, A.H., P4134  
 Mahnkopf, C., P2451, P4552, P5647  
 Mahnkopf, D., P1516, P3206  
 Mahon, N.G., 251  
 Mahr, S., P2158  
 Mahrholdt, H., 1255, P1282, P4548, 5087  
 Mahtab, E.A.F., P573  
 Maiandi, C., P3001, P4691  
 Maida, G., P2431  
 Maiello, M., P5338  
 Maier, B., P1497  
 Maier, L., 5053  
 Maier, L.S., 291, 903  
 Maier, R., P5324  
 Mailander, V., P416  
 Mailhac, A., P2419  
 Maillier, B., P436  
 Mainar, L., P430, P1275, 3567, P4725, 5112  
 Maines, M., P1658  
 Mair, J., P2406, P4662  
 Maisano, F., P4128, P4130, P4144, 5156  
 Maisch, B., P3254, P3279, P3286, P4238, P4884, P4889, 5233, P5591, P5672  
 Maisel, A., 1098, 2771  
 Maisel, A.D., P816  
 Maisel, A.S., P823  
 Maish, B., 2918  
 Maison, P., P3369, P4251  
 Maiwald, M., P4269  
 Maj, J., P4893  
 Maj, R., P463  
 Majdoub, M.A., P2991  
 Majka, M., P4480  
 Majoni, W., 2782, 3544  
 Majoor Krakauer, D.F., 1210  
 Majoor-Krakauer, D.F., P3243, P3247, P4147  
 Majumder, B., P1327, P3829  
 Mak, G., 5047  
 Makarov, L., P4165  
 Makarov, L.M., P2084  
 Makauskienė, R., P4700  
 Maki-Nunes, C., P4025  
 Makielski, J., P404  
 Makino, K., P4070  
 Makino, Y., P3871  
 Makita, N., P826  
 Makri, R., P516  
 Makridis, P., P5662  
 Makris, K., P3189, P3231  
 Makris, T., P2224, P4266  
 Makris, T.H., P460, P608, P2283, P3399, P3401, P3404, P4024, P4681  
 Makrygiannis, S.S., P2986, P3163, P4031, P4218  
 Makuch, M., P3925  
 Malago, R., P1354, P3034  
 Malaquin, D., 2869  
 Malbecq, W., 5163  
 Malcolme-Lawes, L., 5167  
 Malecka, B., P2360, P2361  
 Malek, I., P729, P1684  
 Malek, L.A., P3274  
 Maleki, M., P2417  
 Mali, W.P., P4696, 4975, 4976  
 Malicki, N., P1390, P1401, P1402  
 Malik, F., P2512, P2519  
 Malik, M., 2774  
 Malik, N., P3062  
 Malik, R.A., P3110  
 Malinowski, K., 5218  
 Malinski, T., 384  
 Malkin, C.J., P4664  
 Malkin, R.A., P1647  
 Mall, A., P5575  
 Mallagrino, P., P3806  
 Mallamaci, F., P3406  
 Mallat, Z., 5109  
 Mallek, S., P2353  
 Malliaraki, N.E., P1672  
 Malm, S., P498  
 Malmberg, H., P5696  
 Malshi, E., P1429, P4650  
 Maltret, A., P570  
 Maluenda, G., 2681  
 Malur, F.-M., 5218  
 Maly, M., P3219  
 Malyutina, D., P2543  
 Malyutina, S., P2543, 3535, P3940  
 Mamarbachi, A., P2193  
 Mamas, M., P1554, P3384, P5384  
 Mambou, P., P2308, P3079  
 Mamede, A., P614, P5600  
 Mameli, S., P5589  
 Mammi, C., 4962  
 Mammimi, C., P5368  
 Man, S.C., P3296  
 Manari, A., P450  
 Manca, F., P5695  
 Mancia, G., 168, 1017, P1427, P1435, P3402, P3406, P4022, P5246, P5714  
 Mancini, F.P., P4598  
 Mancini, J., 1904  
 Mancini, M., 1095, P4744  
 Mancini, S., P3156  
 Mancone, M., P470, P3862  
 Manconi, P.E., P5589  
 Mandelli, C., 151  
 Mandinov, L., 2933  
 Mandric, C., P825  
 Mandysova, E., 234  
 Manerba, A., P3001, P4691  
 Manes, A., P722, P1571, P1598, 5172  
 Manes, C., 387, 2913  
 Manfredi, A.A., P5317  
 Manfredi, M., P655  
 Manfredi, S., P3928  
 Manfredini, R., P1565  
 Manfrini, O., P2092, P2937  
 Manfro, S., P2278  
 Mangal, B., 2780  
 Manganaro, D., 151  
 Mangiacapra, F., 340, P1334, P1535, P3232, P4534, P4703  
 Manginas, A., P2947  
 Mangner, N., P1411, P2944, P2951, 4959, 4966  
 Mangrella, M., P5539  
 Mangschau, A., P1468  
 Manicardi, C., P1713, P5657  
 Manigold, T., P2347  
 Manios, E., P2534  
 Manios, E.G., P1672  
 Mann, D.L., P2490  
 Mann, S., P3145  
 Mannarino, S., P486, P5484  
 Mannhalter, C., P3409  
 Mannheimer, C., 2820  
 Manninen, A., P3376  
 Mannini, L., 155, P3331  
 Manole, C., P4652  
 Manolis, A., 131  
 Manolis, A.J., 165, 2641  
 Manoliu, V., P3995, P4649  
 Manousakis, S., 898, P2488, P4208  
 Manousek, J., P2987  
 Manoussakis, M.N., P5576  
 Manovel Sanchez, A., P500, P3872  
 Manovel Sanchez, A.J., P5362  
 Manriquez, L., 977  
 Mansencal, N., P2153, P2155, 5074  
 Mansharipova, A., P4611  
 Mansoor, A., P5482  
 Mansour, M., P4741  
 Mansour, Z., P1676  
 Mansourati, J., P2234  
 Mantas, I., P3330  
 Mantica, M., 5217  
 Mantovani, G., P2507  
 Manzano, C., P4563  
 Manzano, L., 1102, P4235  
 Manzano, M.C., P4114, P4115, P4117, P4120  
 Manzano-Fernandez, S., P657, P4858  
 Manzato, A., P772, P2416  
 Manzo-Silberman, S., P3809, P3810  
 Maor, E., P1513  
 Maounis, T., 1902, 1903, P5610  
 Maragiannis, D., P781  
 Maragnes, P., P1574  
 Marana, I., P3184  
 Maranhao, R.C., P2263, P5720  
 Mararenko, O., P2988  
 Maratou, E., P3106  
 Marazzi, G., P1678, 4962  
 Marcadenti, A., P4945, P5432  
 Marcelino, G., P4026  
 Marcelino, S., P1640, P1642  
 Marchal, J.A., P457  
 Marchandise, B., P3228  
 Marcheix, B., P4740  
 Marchel, M., P1562, P5337  
 Marchenko, A., P5601  
 Marcheschi, P., P4543  
 Marchese, M., P819  
 Marchese, P., P728  
 Marchini, F., P4761  
 Marchioli, R., 134, P412, 981, 987, 1104, P1660, P2495, P2518, P3131, P4206, P5680  
 Marchionni, N., 1899  
 Marchiori, G., P1720  
 Marco, J., P4715, P4736, 4993, 4994, 5151, P5280  
 Marco Zarazaga, I., P5473  
 Marcolino, M.S., P1695  
 Marcolongo, A., P4646  
 Marcon, C., 1924  
 Marcon, O., P2329, P4083  
 Marconi, M., P771  
 Marcos-Alberca, P., P491, P492, P2304, P2397, P3039, P4183, P5329  
 Marcos-Alberca Moreno, P., P4563  
 Marcovic, M., P406  
 Marcoz-Alberca, P., P2401  
 Marcucci, P., 5134  
 Marcucci, R., P1325, P3331, P5499  
 Marcus, C., P1341  
 Marcus, J.T., P5632  
 Mardekian, J., 4978  
 Marechaux, S., P4104, P5564  
 Marek, G., P5559  
 Marek, T., P3905  
 Marelli, A.J., P4776  
 Marenzi, G., P1305, P1736, P3184  
 Marewicz, E., P2958  
 Marfisi, R.M., 134, P412, 981, 1104, P2495, P2518, P4206, P5680  
 Margato, R., P774, 1825, P5496  
 Margetis, P., P2962  
 Margey, R., 251  
 Margheri, M., P699, P1549, P4723  
 Margolis, J., P2502  
 Margolis, P., 4955  
 Margonato, A., P2419, P2504, 5056  
 Margulescu, A.D., P507, P3354  
 Margulies, A., 2681

- Mariani, M., P1606, P3052, 5160  
 Mariani, R., P5714  
 Mariannini, Y., 236  
 Mariano, E., P4087  
 Marie, P.Y., P4083  
 Marie Vahter, M.V., P1727  
 Marijon, E., 255  
 Marin, M.D., P4181  
 Marin Ortuno, F., P657, 1211, P1318, P3266, P4858  
 Marin-Neto, J.A., P3278  
 Marina, L., P3065  
 Marinelli, A., P722, P1571, P1598, 5172  
 Marinelli, M., P4508, P4550  
 Marini, C., P1371, P1597  
 Marini, M., P4575  
 Marinkovic, J., P427, P443, P444, 5208, P5269  
 Marino, F., P3232, P4927  
 Marino, M., P4890  
 Marino, P., P1542  
 Marino, P.N., 1124  
 Marinoni, B., P3222  
 Marinosci, G., P2504  
 Marinou, K., P524, 1022, 1023, P1682, P2200, P5390  
 Mariolis, A., P4267  
 Mariona, V.M.M., P1666  
 Mariotti, R., P5651  
 Marisa Di Donato, M.D.D., 3645  
 Marjamaa, A., P571  
 Mark, B., P5503, P5508, P5509  
 Markakis, K., P5664  
 Markantonis, S., P5535  
 Marketou, M., P5725  
 Marketou, M.E., P1547, P2252, P2257, P2259  
 Markides, V., P767  
 Markl, A., P1416  
 Markl, M., 161  
 Markmann, E., P2946  
 Marko, T., P621  
 Markotic, A., P2223  
 Markowicz, E., P5309  
 Marks, D., 5157  
 Markus, G., P1545  
 Markus, M.R.P., P3976, P4656  
 Markussis, V., P5674  
 Marlinghaus, E., P2972  
 Marmot, M., 3535  
 Marosi, E., P4233, P4234  
 Marott, J.L., 130, P3407, P5425  
 Marques, F., P4853  
 Marques, H., P3038  
 Marques, I., P734, 2677  
 Marques, J., P736, 4977  
 Marques, J.S., P3270  
 Marques, K.M.J., P3098  
 Marques, M., P2320  
 Marques, N., P2129  
 Marques-Vidal, P., P2291, P2292, P2300, P4026  
 Marquezine, G.F., P458  
 Marra, A.M., P2240, P2496  
 Marraccini, P., P1355  
 Marras, E., 1924, P4146, P4151  
 Marrero-Rodriguez, F., P4912  
 Marrouche, N., P4819  
 Marrouche, N.F., P1638, P2451, P4552, P4830, P4831, P4866  
 Marrugat, J., P632, P2298, P3133  
 Marsal, J.R., P4036  
 Marschang, H., P4552  
 Marschang, P., P4605  
 Marshall, H., P2464  
 Marshall, J., 5179  
 Marszalek, A., P2396  
 Martellotta, F., P3259  
 Martens, E., 1108  
 Martens, E.J., P3165  
 Martens, T.P., P3085  
 Marti, G., P4036  
 Marti Aguiasca, G., P4058  
 Martignani, C., P2079, P5618  
 Martin, A., P1652, P1654, P2456, P2472, P3297, P4196  
 Martin, F., P810  
 Martin, F.L., P1424, P1425, 3774  
 Martin, G., P4059  
 Martin, J.L., P3218, 4948  
 Martin, K., 5137, P5265  
 Martin, M., P4142  
 Martin, P., P4718, 5192, 5198, 5199, P5584  
 Martin, R., P2365  
 Martin, R.P., 2004  
 Martin Luengo, C., P1654  
 Martin Moreiras, J., P744  
 Martin-Duran, R., P1422, 2920  
 Martin-Herrero, F., P4196  
 Martin-Luengo, C., P744, P1652, P2456, P2472, P3297, P4196  
 Martinelli, G., P794  
 Martinet, W., 905, 1256  
 Martinez, B., P3133  
 Martinez, C., P5258  
 Martinez, D.G., P1436  
 Martinez, J.G., P1662  
 Martinez, M.D., P2525  
 Martinez, N., P4540, 5080  
 Martinez, P.F., P1673, P1696, P1702, P1708  
 Martinez Comendador, J.M., P1400  
 Martinez Dolz, L., P864  
 Martinez Ferrer, J., P5627  
 Martinez-Dolz, L., P3387  
 Martinez-Gonzalez, J., 377  
 Martinez-Sanchez, C., 1955, P2118  
 Martingano, R., 5244  
 Martini, C., P1273, P1352  
 Martinic, R., P2223  
 Martiniello, A.R., P3896  
 Martinkovicova, L., P3219  
 Martino, R., P1606  
 Martinoff, S., 1260, P3035  
 Martinoni, A., P5268  
 Martinov, V.N., P1414  
 Martins, C., P1599  
 Martins, S., P736, P746, P1455, P2295, 2652, P3150  
 Martischign, A., P717, P1613, P5568  
 Martucci, G., P4776  
 Martuscelli, E., P4087  
 Marui, A., P2487  
 Maruyama, H., P1331, P1582  
 Marvasty, I., P3014  
 Marwan, M., P1358, P4564  
 Marwick, T., P4924  
 Marwick, T.H., P875, 890, 2046, 2053, P4881, P4908, P5453  
 Marx, M., P1619  
 Marx, N., P5369  
 Mary, D.A.S.G., P2526  
 Mary-Krause, M., P2977  
 Maryniak, A., P4772, P4783  
 Marzari, A., P3173  
 Marzi, A., P2455  
 Marziali, M., P4151  
 Marziliano, N., 1212, 5039, P5484, P5671  
 Marzilli, M., P4931  
 Marzo, F., 2776, P3260  
 Marzocchi, A., P4723  
 Marzona, I., 987, P3131  
 Marzullo, P., P4576  
 Masaki, Y., 3659  
 Mascherbauer, J., P5327  
 Maschietto, N., P2383, P4799  
 Masci, P.G., P822, 1253, P3360, P4549, P4550, P4553  
 Maseri, A., P4675, P5317  
 Masia, R., P632, P2298  
 Masiello, P., P5487  
 Masoli, O., P850  
 Mason, B., P1479  
 Mason, J., P4763  
 Mason, J.C., 390, P4551  
 Masotti, M., P2983, 5147  
 Masoura, C., P449, 1014, P1446, P1486, P2265, P3126, 3542, P3981, P4692  
 Masoura, K., P5711  
 Massa, E., P2507  
 Massa, L., P3259  
 Massaro, J., 3531  
 Massaro, R., P1678  
 Massart, F., P1454  
 Massias, S., P460, P608, P2283, P3399, P3401, P3404, P4024, P4681  
 Massie, B.M., P2490, 5041  
 Massion, P., 5226  
 Masson, S., 1099, P1719  
 Masson, S.C., P1647  
 Mast, T.P., 1956  
 Mastej, M., 983  
 Mastorakou, I., 2868  
 Mastrocolla, L.E., P583  
 Mastrogiovanni, G., P5487  
 Masuyama, T., P1421  
 Matangi, M., P505, P5529, P5713  
 Mateescu, B., 384  
 Matei, C., P2132  
 Matei, D., P4271  
 Matejka, G., P648, P1741, P3223  
 Matera, D., P4001  
 Matetzky, S., P1362, P2227, P2968  
 Mateus, P., P774, 1825, P5496  
 Mathai, M., P2104  
 Matharu, G., P2424  
 Mathias Junior, W., P4748  
 Mathiasen, A.B., 2816  
 Mathiesen, E.B., P5426  
 Mathieu, A., P603  
 Mathieu, P., P3792, P4092, 5237  
 Mathijssen, J.J., P3123  
 Mathur, A., P1566, P3281  
 Matias, F., 5236  
 Matias Dias, C., P2300  
 Mathiasvili, A., P4072  
 Matic, G., P2126  
 Matiello, M., P1617  
 Matos, A., 1107  
 Matos, L.D.J., P1436  
 Matos-Souza, J.R., P2530, P3403, P4019, P4942  
 Mats, I., P4585  
 Matsakas, E., P3330, P5587  
 Matschke, K., P732, 2772  
 Matsubara, H., 394, P1514  
 Matsubara, L.S., P1673, P1696  
 Matsuda, O., P688  
 Matsuda, R., P4921  
 Matsuda, S., P3374, P4476  
 Matsuda, T., P565, P4921  
 Matsui, T., 5132  
 Matsushita, T., 2007, P2362  
 Matsumoto, C., 170, 1024, P2280, P4015, P4017, P4671, P5438  
 Matsumoto, K., 5129, P5605, P5650  
 Matsumoto, M., P4630  
 Matsumoto, S., P626, P3041, P4569  
 Matsumoto, T., 2676  
 Matsumoto, Y., 4964  
 Matsunaka, T., P4021  
 Matsuo, A., P826  
 Matsuo, K., P826  
 Matsuo, S., P4828  
 Matsuoka, H., P4060  
 Matsuoka, K., P4547  
 Matsushita, S., P4554  
 Matsuura, T., P830, P2277  
 Matsuzaki, M., P3374, P3818, P4067, P4476, P5248  
 Matsuzaki, T., P733  
 Mattace Raso, F.U.S., 2003  
 Mattei, S., P2329  
 Matter, C., 384  
 Matter, C.M., 378, P3944, P4593, P4609  
 Matthieu, A., P4743  
 Matthijs, G., P4695  
 Mattioli, A.V., 2643  
 Mattioni, T., 2774  
 Mattle, H.P., P2349  
 Mattschoss, S.F., P5461  
 Mattson, M., P1738  
 Matyjaszczyk, M., P3930  
 Matzaraki, V., P5587  
 Maubaret, C., P3928  
 Maud Daleskog, M.D., P1727  
 Maupas-Schwalm, F., P1291  
 Maurer, G., P3004, 5164, P5376, P5405

- Maurer, U., 903  
 Mauri, F., P540  
 Mauri, L., 2923  
 Maury, P., 5097  
 Mavarakis, H.E., P1672  
 Mavreas, V., P4013  
 Mavrogeni, S., P5576, P5674  
 Maximiliano, P., P5432  
 Maximov, D., 2052  
 Maximov, V., P3940  
 May, A., 5232  
 May, A.E., P695, 2680, P4613, P4867  
 May, L.M., 2018  
 May, O., P1283, P1284  
 Mayer, B., P4689  
 Mayer, J., P3081  
 Mayer, P., P603  
 Mayer, S., 282  
 Mayosi, B., P3798  
 Mayosi, B.M., P3246, P4877, P5577  
 Mayr, A., P1347, P1401  
 Mayr, H., P2437  
 Mayr, K., 4969  
 Mazaraki, A., 164, P1483, P2224, P2232, P2236,  
 P2284, P2286, P2529, P2538, P2539, 2644,  
 P3408, P3410, P4256, P4266, P4270  
 Mazarakis, A., P2138  
 Mazdorova, E., P3940  
 Mazon, P., 5004  
 Mazuelos, F., P4801  
 Mazurek, M., P659, P3230  
 Mazurek, T., 392  
 Mazurek, W., P817  
 Mazza, M., P559  
 Mazzadi, A., P1392  
 Mazzanti, M., P4575  
 Mazzarisi, A., P1355  
 Mazzella, F., P590, P4623  
 Mazzitelli, D., P4126  
 Mazzoleni, P., P3042  
 Mazzone, A., P4628, P4932, 5160, P5567  
 Mazzone, P., P2431, P2455  
 Mazzotti, E., 1209, P1267  
 Mazzucco, A., P1263  
 Mazzucotelli, J.P., P2328  
 Mcaroe, D., P613  
 Mcbride, D., P642  
 McCaffrey, D., P2516  
 Mccann, H.A., 251  
 Mccarthy, P.M., P2394  
 Mccarty, F., 123  
 McCollam, P., P3821, 5201  
 McCormack, T., P1734  
 Mccrary Sisk, C., P1733  
 Mcdonagh, S., P3048  
 Mcdonagh, T., P831  
 McDonald, K., P2516  
 Mcdonald, K., P2537, 5047  
 Mcgale, P., 2782, 3544  
 Mcgeoch, R., 1254, P4751  
 McGhie, J.S., P3902, 5171  
 McGill, L., P4112  
 McGill, L.A., P1566, P3257, P3281  
 Mcgoon, M.D., P1578  
 MCGrew, F.A., P3315  
 Mcguire, P., 3654  
 McGuirk, P., 2017  
 Mchale, E., P4645  
 Mckee, D., 245  
 Mckelvie, R., 1103, 5041  
 Mckenna, W., P1561  
 McKenna, W.J., P3242, P3245, 5234  
 Mckenna, W.J., P1262  
 Mckenney, J., P1733  
 Mckie, P.M., P1425  
 Mclaughlin, M.-J., 1254, P4751  
 Mclure, K., P5422  
 McMurray, J.J.V., 150, 240, 241, P820, P821, 1105,  
 P2477, P4205, P4220, 5041, 5081, P5523,  
 P5679, P5685, P5701  
 Mcneil, J.J., P2233, P5585  
 Mcnulty, H., P3804  
 Mcqueen, K., P4002  
 McTernan, P.G., P2210  
 McWilliams, E.T., 249  
 McWilliams, E.T., P3020  
 Mead, A., P582, P594  
 Meave, A., 391  
 Mebazaa, A., P3822, P4213, P4240, P4243,  
 P4878, P4926, 4985, 5079, P5688  
 Mechmeche, R., P5259  
 Mechta-Grigoriou, F., 384  
 Meco, S., P2976  
 Mecteau, M., P2499  
 Medack, A., P4689  
 Medeiros, A., 4961  
 Medeiros, A.M., P2276, P2297  
 Medesani, L., P2468  
 Medina, A., 2000, P2369, P4718, P4801, 5192,  
 5198, 5199  
 Medina, E., P4181  
 Medina Fernandez-Aceytuno, A., P5622, P5623  
 Medler, C., P2238  
 Meerkin, D., 290  
 Meesmann, M., P4245  
 Meeus, P., P5676  
 Meguro, T., P5665  
 Mehani, S., P2500  
 Mehilli, J., P644, P684, P1313, P1332, 2929, 2931,  
 P2995, P4711, P5304  
 Mehl, U., P3082  
 Mehling, H., 2020  
 Mehran, R., P645, 1957, P3850, 5196, 5210, 5211  
 Meier, B., P717, P2164, P2349, P3797, P4044,  
 P5256  
 Meier, M., 1244  
 Meier, P., P3192, P4758  
 Meijboom, F.M., 5171  
 Meijers, T.A., P1344  
 Meilitz, A., P3332  
 Meimoun, P., 2869, P4104  
 Meine, M., P5646  
 Meiners, S., P3955, 5140  
 Meinertz, T., 2824, 3651, P4510, P4836, P4841,  
 5158, P5634  
 Meinhardt, G., P1282  
 Meinzer, M., P5508  
 Meisel, S., P4211  
 Meisinger, C., 132, 1108, P4669  
 Meiss, L., P5656  
 Meissner, A., P4197  
 Meissner, A.M., P765  
 Meister, T., P4833  
 Meitinger, T., P4689  
 Meixner, F., P4479  
 Melacini, P., P3241, P3250  
 Melander, O., 167, P4670, P4838  
 Melandri, G., P423, P424, P3858  
 Melberg, T., P4523, P4527  
 Melchior, T.M., 1826, P3170  
 Melchiorre, K., P2384, P5716  
 Melchiorre, M., P409  
 Mele, D., 5130, P5645  
 Melekhov, A.V., P836  
 Melenovsky, V., P729, P1684, P3349  
 Melian, F., P4718, 5198  
 Melian Nuez, F., P5622  
 Melina, G., P407  
 Mellbin, L.G., P3003  
 Mellon, C., P1734  
 Meloni, A., P827, P2080, P3028, P4543, P4879  
 Meloni, L., P4743  
 Melotti, R., 2643  
 Meluzin, J., P3081  
 Melzer, C., P789  
 Memic, K., P3334  
 Menasche, P., P2395  
 Mendell, J., P2105  
 Mendes, M., P611, P2296  
 Mendes, P., P711, P2973, P2974, P3000, 5185  
 Mendez, I., P4784, 5161  
 Mendicino, I., 904  
 Mendonca, M.I., P533, 3775, P4642, P4683, P4687  
 Menegatti, G., P5477  
 Meneghelo, R.S., P583  
 Meneguzzo, N., P1263, P1694, P3259, 5230  
 Meneses, C.P., P1488  
 Meneveau, N., P521, P2098, 2823, P2935, P3090,  
 P3856, P4037, 5209  
 Menger, M.D., 1156  
 Mengin, A., P5675  
 Menicanti, L., P851, 3646  
 Menna, A.C., P812  
 Menon, V., 397, P3826, P3846, P3853, P5294,  
 P5349, P5488, P5491  
 Menotti, A., P4727  
 Menown, I., P4518  
 Menozzi, A., P3016  
 Menozzi, C., P5695  
 Menrath, B., P569, 3781  
 Mentzikof, D., 1022, P5390  
 Menzel, A., P574  
 Menzel, C., 4979, 4982  
 Menzel, K., 4972  
 Mercatanti, A., 388  
 Merceron, O., P511, P5573  
 Merchant, F., P5310  
 Mercier, N., P4591  
 Mercurio, G., P2507, P5589  
 Meredith, I., P671  
 Meredith, I.T., 1261  
 Meredith, P., P4509  
 Meregalli, P.G., 5120  
 Merentie, M., P2203, P5389  
 Merentie, M.J., P3388  
 Merhi, A., 2782, 3544  
 Merhi, Y., P2093  
 Meriggi, P., P1427, P3042  
 Merino, D., 2920  
 Merino, J.L., P755, P3299  
 Merino, R., P1422, 2920  
 Meris, A., P1707, P2161  
 Merkely, B., P545, P3309, 4991, P5615, P5626,  
 P5706  
 Merkin, M., P3941  
 Merkl, M., P1569  
 Merkouri, E., P5393  
 Merletti, F., 885, P3168  
 Merlini, G.P., 344  
 Merlini, P.A., P540  
 Merlo, M., 1213, P3264, P3272, P4244  
 Merola, B., P2496  
 Mertens, F.W., P2243, P5524  
 Mertz, L., 5069  
 Mertzanos, G., P3189, P3231  
 Merx, M., P1385  
 Merx, M.W., P3063  
 Mesa, D., P2369, P4801  
 Mesa Rubio, D., 1951, P2306  
 Mesa Rubio, M., P2305  
 Mesa Rubio, M.D., P5320  
 Mesquita, A., 5236  
 Mesquita, E.T., P1709, P4898  
 Messas, E., P479, P2395  
 Messier, M., P1649, P5620  
 Messika-Zeitoun, D., 2006, P2413, P4099, P4131  
 Mestiri, T., P2067  
 Mestroni, L., 1213  
 Metallinos, G., P468, P859, 3539, P4919, P5667,  
 P5703  
 Metaxa, S., P3929  
 Metaxa, V., P1446, P2265  
 Metcalfe, E.A., 988  
 Metha, R.H., P851  
 Methe, H., P462, P2323, P5379  
 Metra, M., 1101, P1659, P2486, P2489, 2763,  
 P3001, P3830, P4252, P4691, P5638, P5658  
 Metreveli, L., P5339  
 Mettauer, B., P2328  
 Metz, D., P1341  
 Metzger, J.-T.H., P4164  
 Metzger, J.P., P1469, P4716  
 Metzler, B., P1347, P1390, P1391, P1401, P1402  
 Metzner, A., P757, P1644, P2429, P4127, P4832  
 Meuleman, C., P4190  
 Meune, C., P3276  
 Meurer, M., P4178  
 Meusel, K., P1683  
 Meuwissen, M.M., P2938  
 Mewis, C., P2444, 5221  
 Mewis, C.H., P568  
 Mewton, N., P3870



- Meyborg, H., P1321, P4606  
 Meyer, B., 285, P3820, P3837  
 Meyer, F.J., P1586  
 Meyer, G.P., P2355  
 Meyer, M., P2077, P5675  
 Meyer, P., P4203  
 Meyer, R., P1524, P1525, P1533, P4762  
 Meyer, S., 5158  
 Meyer, T., 1260, P3035, P3254  
 Meyering, B., P3394  
 Meyhoefer, J., P2469  
 Meyns, B., P4810  
 Mezzani, A., P1660  
 Mezzetti, M., P771  
 Mghaieth, F., P5259  
 Miano, M., P685, P2066, P4722  
 Michaelides, A., P607, P781, P879, P4023, P4682, P4907, P4940, P4946, P5711  
 Michaelidis, A., P5341  
 Michaels, A.D., P816, P5548  
 Michailov, G.V., 3541  
 Michalak, E., 2043  
 Michalak, J.M., 2043  
 Michalak, M., P1328  
 Michalakeas, C., P1663, P5668  
 Michalewska-Wludarczyk, A., P3089  
 Michalis, L.K., P2103  
 Michalodimitrakis, E., P5396  
 Michalopolou, E., P460, P608, P2283, P3399, P3404, P4024, P4681  
 Michalowska, I., P5542  
 Michalska, M., P2505  
 Michaud, J., 5121  
 Michaud, M., P4491  
 Michel, J.B., P5573  
 Michel, P.L., P511, 5149  
 Micheletti, A., P510, P4814  
 Micheletti, L., P4927, P4939  
 Micheli, A., P4759  
 Michelongona, A., 395, 3559  
 Michels, M., 1210, P3243, P3247  
 Michelsen, M.M., P5553  
 Michelson, E.L., 5081  
 Michev, I., P1544, P4128, P4130, P4144, 5156  
 Michowitch, Y., 1117  
 Mickley, H., 148, P3040, P5501  
 Midi, P., 5085  
 Mielot, C., P4107  
 Miera, O., P4812  
 Mieres, J., P1501  
 Miettinen, K., 5075  
 Miettinen, T.A., P2275  
 Miglionico, M., P4534  
 Migliore, F., 1115  
 Migliore, R.A., P4096, P4097  
 Migliorini, A., P665, 4950  
 Mignot, A., P2141  
 Mihaila, M., P825  
 Mihailescu, A., P4899  
 Mihajlovic, B., P2312  
 Mihalcz, A., P3343  
 Mihara, H., P733  
 Mihil, C., P1375  
 Mikami, S., P2216, P3215, P3416, P5541  
 Mikhail, G.W., P3844  
 Mikhaylov, E., P4821, P4850  
 Mikhcheva, Y.A., P2439  
 Miki, K., P1288  
 Miki, T., P1388, P1389, 5141  
 Miklik, R., P4227, 4990  
 Mikovic, D., P4199  
 Mikros, E., P2492  
 Milanese, O., P2383, P4799  
 Milani, L., P4223  
 Milanov, S., P708  
 Milathianaki, M., P1672  
 Milberg, P., P565, P2418, P3252, P4640, P4833  
 Milei, J., P4482  
 Milesi, G., P3001, P4691  
 Milhem, A., 5099  
 Milicic, D., 1123, P1308, P2340, P3796  
 Milicin, I., P3046  
 Milionis, H., P1315, P1319, P4013  
 Miliou, A., 386, P524, P536, 1022, P1287, P2109, P2284, P3400, P3410, P3917, P3929, P3972, P4253, P4267, P4612, P4682, P4930, P4940, 4998, 5136, P5390, P5421, P5667  
 Millaire, A., P1568  
 Millan, J., P2272  
 Millane, T., 5152  
 Miller, A., 5049  
 Miller, A.M., P821  
 Miller, C.A., P1494  
 Miller, D.M., P696, P1735  
 Miller Mayer, E., 4969  
 Millet, G., P3926  
 Millionis, R., P5561  
 Mills, P., P4112  
 Mills, P.G., P1566, P3142, P3257, P3281  
 Mills, R.W., 1922  
 Mills, S., 5115  
 Miloro, C., 2643  
 Milting, H., P1691  
 Mimoso, J., P2129  
 Mimoun, L., P4807  
 Min, H.S., P4728  
 Min, J.J., P543  
 Min, M.S.Y., 4952  
 Min, S.Y., P2152, 5093  
 Miname, M.H., P2271  
 Miname, M.H.M., P4748  
 Minami, Y., 2817  
 Minana, G., P4725  
 Minarik, T., P5640  
 Minatoguchi, S., P2478, P2483, P3899, P3904, P4071, P4177, P4179, P4572, P5515  
 Minden, H.-H., P4080  
 Mineau, G.P., P5548  
 Mineo, C., P3406  
 Mineoi, K., P4021  
 Mingo, S., 3656  
 Mingueta, A., P2525  
 Minguell, J., P3069, P4504  
 Miniati, M., P1592  
 Minneci, C., P5680  
 Minniti, G., P2409  
 Minnocci, A., P2198  
 Minoura, Y., P2470  
 Minten, J., P758  
 Mintert, E.M., P4197  
 Mintz, G., P4074  
 Mintz, G.S., 2933  
 Miolo, G.M., P1694, P3259  
 Mioulet, D., P5582  
 Miraglia, R., P2972, P3061, P3065, P3076  
 Miramont, G., P4096, P4097  
 Miranda, C.H., P3278  
 Miranda, F., P4051  
 Miranda, J., P5433  
 Miranda, M., P2296  
 Miranda, R., P2403, P5344  
 Mirek, A., P1280, P4525  
 Mirica, N., P1395  
 Miriuka, S., 5244  
 Miro, J., P2377, P2379  
 Miro, V., P4259  
 Miro-Casas, E., P4485  
 Miron, I., P825  
 Mirtelli, C., P2199, P2201  
 Mirza, I., P678  
 Misao, Y., P2483  
 Mischke, K., P807, P3056  
 Mishkel, G., 3653  
 Mismetti, P., P698  
 Misra, M., P5575  
 Misra, P., P2389  
 Misra, R., P3316  
 Missiou, A., P5375  
 Mistry, N., P2122, P3877  
 Miszalski-Jamka, T., 1259  
 Miszczak-Knecht, M., P4772  
 Mita, C., 2866  
 Mitakou, S., P1484  
 Mitchell, A., 1920  
 Mitchell, A.R.J., P2368  
 Mitchell, B., P2471, P2473  
 Mitchell, J., P1513  
 Mitchell, S., P1488  
 Mitchell-Heggs, L., P3887  
 Mitov, V.M., P2970  
 Mitrousi, K., P4208  
 Mitrovic, P., P444  
 Mitrovic, P.M., P2126  
 Mitrovic, V., P1577  
 Mitrushkin, D., P1432  
 Mitry, E., P2153  
 Mitsuba, N., P2216, P3215, P3416, P4583, P5541  
 Mitsudo, K., P652, P656, P668, P690, P691, P4038  
 Mitsutake, R., P1379  
 Mittag, J., P4188  
 Mittal, M., P5575  
 Mittendorf, J., P1577  
 Mittler, T., 1242  
 Mittmann-Braun, E.L., P2444  
 Mittmann-Braun, L., P2423  
 Miura, K., P5683  
 Miura, S., P1379  
 Miura, T., P1388, P1389, P2476, 5141  
 Miyagi, H., P1348  
 Miyahara, M., P3352  
 Miyaji, K., P1514  
 Miyake, F., P612, P4756  
 Miyamoto, K., P830, P2277  
 Miyamoto, S., P4517  
 Miyamoto, Y., P1537, 4986  
 Miyazaki, A., P693  
 Miyazaki, S., P471, P652, P656, P2119, 3657, P4828, 5110  
 Miyazawa, C., P830, P2277  
 Miyoshi, N., P1517, 3563  
 Miyoshi, T., P3934, P4934, 5005  
 Mizia, M., P2239, P5321  
 Mizia Stec, K., P2239  
 Mizia-Stec, K., P5321  
 Mizukoshi, M., 900, P1278, 3561, 3566, P4052, P4467, P4472  
 Mizuma, H., 5001  
 Mizuno, K., P733, P1491  
 Mizutani, K., P5628  
 Mladenow, A., P4133  
 Mlcochova, H., 5107  
 Mlynarski, R., P4561, 5065  
 Moat, N., P2514  
 Moatamri, F., P2991  
 Moccetti, T., P1281, P3067, P3070, P3094, P4560, P4646, 5067  
 Mocerri, P., 895, P2151  
 Mocharla, P., 2913  
 Mochizuki, S., 1021, P5479  
 Mochly-Rosen, D., P3378  
 Mock, L., P3859  
 Mockel, M., 1098, P3834  
 Modena, M.G., 337, P728, P1713, P3229, P3994, P4003, P4571, P5657  
 Moebius-Winkler, S., P1411, P1583, P2480, P2944, P2950, P2951, P4755, 4966, 4972  
 Moegelvang, R., P3407  
 Moehl, G., 254  
 Moehlenkamp, S., P4750  
 Moehlmann, H., P5705  
 Moelker, A., P660, P1285, P4035  
 Moeller, J.E., P2171  
 Moellmann, H., 282, P843, 1257, P1364, P1406, P1545, 1961, P2206, P3019, P3371, P4736  
 Moelmen-Hansen, H.E., P3802, P5707  
 Moennig, G., P2418, P4833  
 Moens, A., P5700  
 Moeremans, K., P1470  
 Moertel, H., P2461  
 Moertel, D., P4210  
 Mogelvang, R., P1556  
 Moggi, A., P772  
 Moggridge, J.C., P2148, P4189, P5552  
 Mohamed, T.M.A., P1423  
 Mohammad, B.M., P4769  
 Mohammed, N., 283  
 Mohan, B.V.M., P5449  
 Mohan, V., P5449  
 Mohanty, P., P770, P2448  
 Mohanty, S., P3086  
 Mohaupt, S., P1595  
 Mohiaddin, R., P2514, P3269

- Mohiaddin, R.H., 2002, P4618  
 Mohiddin, S.A., P1566, P3257, P3281  
 Mohr, F.-W.M., 2928  
 Mohr, F.W., P842, 1012, P2068  
 Moibenko, A.A., P2135  
 Moilanen, A.M., P3376  
 Moizadeh, P., P1594  
 Moir, S., P3880  
 Moir, W.S., 1261  
 Moiraghi, C., P1330  
 Moiseev, V.S., P2497  
 Moises, V.A., P4794  
 Mok, M.Y., P4556, P4565  
 Moktar, S., P2154  
 Molaee, P., P1349, P1374  
 Moldovan, H., 5042, 5242  
 Molina, A., P4094  
 Molina, C.E., P564, P578, 1240  
 Molina, J.D., 2645  
 Molina, L., P4094  
 Molina, M., P3207  
 Molina-Mora, M.J., 5128  
 Molinari, F., 4962  
 Molinaro, S., P433, 1106, P3833  
 Moll, F.L., 893, P3104, P3105, P3107, P3920, P5387, P5440  
 Moll, R., P5591  
 Mollema, S.A., 2054, P3866, 5088, P5272  
 Moller, V., P2469  
 Mollerus, M., P809  
 Mollet, N., P1285  
 Mollett, N., P4129  
 Mollnau, H., P1618, P1630  
 Mollo, R., P597  
 Molmen, H.E., 4970  
 Molnar, J., P2309  
 Molnar, L., P3309, P5626  
 Mols, F., P3165  
 Moltrasio, M., P1305  
 Moltzer, E., 2003, P5544  
 Monaco, C., 379  
 Monaco, S., P4033  
 Monassier, J.P., P2090, P5301  
 Monchi, M., 5162  
 Mondillo, S., 1124, P1490, P3893, P4470  
 Monedero, M.C., 289  
 Monelli, M., P4727  
 Monello, A., P4675, P5317  
 Monfredi, O.J., P2366  
 Monge, J., P5357  
 Monge, J.C., P2296  
 Monin, J.L., 5162  
 Monivas, V.M.P., P1666  
 Monivas Palomero, V., 1910  
 Monmeneu, J.V., P430, 3567, 5112  
 Monopoli, D., P3229  
 Monos, -, P1725  
 Monsegu, J., P2115  
 Monserrat, L., 1211, P3253  
 Monsonis Artero, J.V., P5473  
 Mont, L., P557, P1617, P1662, P3291, P3292, P3302, P3305, P3337, P4641, P5608, P5636  
 Mont I Girbau, J., P5706  
 Montagnani, S., P2972, P3061, P3065, P3076  
 Montagne, O., P3369  
 Montalescot, G., P431, P1301, P1333, 1800, 1952, 1955, P2083, P2090, P2118, P3852, P4716, 4989, 4992, 5200, 5207, P5296  
 Montalesoct, G., P5276  
 Montana, O., P3926  
 Montanaro, C., P2504  
 Montassier, E., P3831  
 Montaudon, M., P4787  
 Montaye, M., P2128, P5443  
 Montebello, E., P4596  
 Monteduro, C., P4939  
 Monteiro, B., P2296  
 Monteiro, C., P1465  
 Monteiro, C.M., P3939  
 Monteiro, P., P426, P428, P439, P711, P734, 2677, P2973, P2974, P3827, P3832, P4225, P4537, P4904, 5185  
 Monteiro, P.F., P3000  
 Monteiro, S., P426, P428, P711, P2973, P3000, P3827, P3832, P4225, P4537, P4904, 5185  
 Monteiro-Cardoso, V.F., P411  
 Monteiro-Silva, V., P2263  
 Monterosso, C., P712  
 Montes Orbe, P.M., P3848  
 Montessuit, C.H., P556, P1398  
 Monti, L., P5299  
 Monti, M.G., 1248  
 Montiel, J., 1240  
 Montiglio, F., P852  
 Montini, M., P3402  
 Montisci, R., 1003, P4743, P4761  
 Montone, R.A., P461, P1271  
 Montorfano, M., P1544, P4128  
 Montorsi, P., 5071, P5511  
 Montrone, D., P4191  
 Monzani, V., 151  
 Moolman-Smook, J., P3246  
 Moon, C.I., P1515, P4535, P5400  
 Moon, J.C., P1262  
 Moon, L., P5460  
 Moonen, M., P2399, 2864, P4093, P5326, P5333, P5335, P5336  
 Mooney, D.J., 4974  
 Moons, K.G., P4887  
 Moons, P., P4789, P4805  
 Moore, M.J., P5434  
 Moore, P., P4521  
 Moore, R., P4521  
 Moorman, A.F.M., P3238  
 Moos, V., P3794  
 Mooser, V., P2291  
 Mor-Avi, V., P2143  
 Moradas, A., P2320  
 Moradas Ferreira, M., 5243  
 Moraes, R.C., 1150, P2999, P3005  
 Morais, E., P1498  
 Moralejo-Martin, M., P4235  
 Morales, A., P3133  
 Morales, P., P1572  
 Morange, P., 5119  
 Moranta Ribas, E., P788  
 Morath, T., P1332, 5114  
 Moreau, R.L.M., P4699  
 Moreira, I., P774, 1825, P5496  
 Moreira, L.B., P4945, P5432  
 Moreira, L.F.P., P5699  
 Moreira-Goncalves, D., P741  
 Morel, M., P521  
 Morel, O., P1307, P1312, 5069  
 Morel, S., 5139  
 Moreno, A., 5199  
 Moreno, P.M., P3225  
 Moreno, R., P3956  
 Moreno, S., P3299  
 Moreno Djadou, B., P5622, P5623  
 Moreno Planas, J., P566  
 Moreno-Garcia, M.A., P3916  
 Moretti, C., P4057  
 Moretti, M., 1213  
 Moretti, P., 5101  
 Morgado, F., P1640, P1642, P2454, P3321  
 Morgagni, R., P4087  
 Morgan, C., 1018  
 Morgante, E., P3271  
 Morgenthaler, N.G., 285, P3003, P3820, P4670, P4914  
 Morguet, A.J., P3794  
 Mori, E., P3932  
 Mori, N., P4554  
 Mori, R.F., 1925  
 Mori, T., P3932  
 Moriguchi, M., 3659  
 Morii, J., P3932  
 Morillas, P., P864  
 Morillo, C.A., 1914, P2447, P4847  
 Morimoto, T., P2487  
 Morin, D., P1384  
 Morinigo, J., P1652, P1654, P2456, P3297  
 Morinigo, J.L., P2472  
 Moris, C., P2481, P4731  
 Morisco, C., 1248, P3948  
 Morishima, I., P692  
 Morishita, S., P4005  
 Morita, K., P4583  
 Morita, T., P5248  
 Morita, Y., P3041, P4569  
 Morizzo, C., P1429, P1454, P4650  
 Morley, C., 1798, P3125, P4513, P5476  
 Morley, C.A., P4521  
 Morley, R., P5284  
 Mornos, C., P414, 2052  
 Moro, E., 1924  
 Moroni, F., P701, P719  
 Moroni, M., P3023  
 Morrell, J., P629  
 Morris, G., P4103  
 Morris, P., P4664  
 Morris, R., P3829  
 Morrison, H., P5461  
 Morrow, D., P3008  
 Morshuis, M., P1691  
 Morsli, H., P2190  
 Morsolini, M., P712  
 Mortensen, K.H., P4714, P4816  
 Mortensen, L.S., P5531  
 Mortensen, P.T., 1921  
 Mortensen, S.B., P1322  
 Mos, L., 160  
 Moschi, G., 4950  
 Moschovitis, A., P3094  
 Moser, D., P3154  
 Moser, M., 1246  
 Moses, J., 5196  
 Moses, J.W., 1957, 5210  
 Moshos, G., P5637  
 Moskowitz, A., P856  
 Mosquera, V.X., P596  
 Moss, A.J., P1667  
 Mosseri, M., P456, P5451  
 Mossrei, M., P2954  
 Mostarda, C., P2484  
 Mosterd, A., P4696, 4975  
 Mostowik, M., P5303  
 Mostratou, E., P4256  
 Moter, A., P3794  
 Motovska, Z., P1272, P3200, P3821, 4990, 5201  
 Motoyama, A., P4629  
 Motoyama, S., P3010  
 Motro, M., P3017, 3545  
 Motschenbacher, S., P2482  
 Mottier, D., P3369  
 Mottola, M., P1703  
 Motyl, R., P5504, P5510  
 Motz, I., P5402  
 Motz, R., P3055  
 Moubarak, G., P3336  
 Moulakakis, A., P1443, P4270  
 Moulin, F., P4083  
 Moulin, G., P1346  
 Moulin, N., P698  
 Moum, T., P5606  
 Mountokalakis, T., P2282  
 Mouquet, F., P2204  
 Mouquet, V., P1628  
 Moura, C., P3383  
 Mourad, J.J., P4849  
 Mourad, W., P2093  
 Mourali, M.S., P5259  
 Mouras, J., P850  
 Mouridsen, M., P5423  
 Mouridsen, M.R., P1289  
 Mourouzis, I., P5664  
 Mousavi, N., P494, P3816  
 Mousis, V., P2103  
 Mousseaux, E., P2081  
 Moustakas, G., P634, P3134, P4009  
 Mouton, E., P1648  
 Moutsopoulos, H.M., P5576  
 Mowinkel, P., P4617  
 Mozzini, C., P2278  
 Mrabet, K., P4037, 5209  
 Mrazek, V., P522  
 Mrdovic, I., P427, P443, 5208, P5269  
 Mroczo, B., P5712  
 Mucchiano, C., 2821  
 Muckova, K., P793  
 Muderrisoglu, H., P514, P2237, P2430, P5648

- Mudra, H., P1277, P2096, P2990, P3180, P4721, P5503, P5509  
Mudra, H.M., 2928  
Mueck, W., P1577  
Muecke, N., P3373, P3396  
Muegge, A., P1530  
Muehlenbruch, G., P3056, P4134  
Mueller, A., P550, P1321, P3234  
Mueller, B., P4186  
Mueller, C., 2771, P4213, P4240, P4243, P4248, P4878, P5687  
Mueller, C.H., P2406, P4201, 4985, 5078  
Mueller, D., 254  
Mueller, I., P3096  
Mueller, J., P2322, P4798  
Mueller, L., P1530, 5241  
Mueller, M., P1569, P2077, 2913, 5231  
Mueller, P., P3083  
Mueller, R., P4143  
Mueller, S., P2344  
Mueller, T., 158  
Mueller, U., P4690  
Mueller-Ehmsen, J., P561, P3072  
Mueller-Hoecker, J., P3082  
Mueller-Wellensiek, K., 902  
Muench, G., P4613  
Muendlein, A., P1464, P2262, P2279, P2975  
Muenkel, C., P5375  
Muenzel, T., P1476, P3120  
Mugelli, A., P567, P3273, 5052  
Mugellini, A., P4839  
Mughal, S., 5118  
Muhl, L., P544  
Muhyaldeen, S., P5643  
Muiesan, M.L., P862, P2207, P4526, P4910, P4927, P4939, P5471  
Muir, D.F., P5284  
Mujib, M., P4203  
Mujovic, N., P3985  
Mukadam, M.E., 3639  
Mukawa, H., P692  
Mulak, G., P436, P631  
Mularek-Kubzdela, T., P2396, P3196  
Mulder, B.A., P4767  
Mulder, B.J.M., P1381, 2001, P4764, P4767, P4782, P4789, P4802, 5174  
Mulder, P., P2510  
Mullen, M.J., P2148, P2514, P4766, P4768, P5552  
Muller, C., P823, P3877  
Muller, D., P406  
Muller, O., P1334, P1527, P1535, 3564, P4752  
Muller, R., P3834  
Muller-Bardorff, M., P3840  
Muller-Ehmsen, J., P3066, P5448  
Mulliez, A., P1587  
Mulligan, L.M., 1922  
Mulvagh, S.L., P3880  
Mundigler, G., P3792, P4092, 5164  
Munemasa, M., P1514  
Muneretto, C., P772, P2416  
Mungroop, H.E., P854  
Muniz, J., P5454  
Munk, K., P2130, 5146  
Munoz, A., P3241  
Munoz, R., P4229  
Munoz Cacho, P., 5013, 5016  
Munoz Garcia, A.J., P2481, P4734  
Munoz-Guijosa, C., P578  
Muntean, B.G., P3284, P4820  
Muntean, D., P1395  
Muntner, P., P3225  
Munyombe, T., 1797  
Munzel, T., P2238, P3957, P4505, P4874, P5399  
Munzel, T.F., P1294  
Muraglia, S., P4727  
Murai, M., P3819  
Murakawa, Y., P3303  
Murakoshi, N., 1923, P2251, P3036, P4862  
Murali Babu Rao, R., P5522  
Muramatsu, T., P3197  
Muraoka, Y., P3199  
Muraro, S., P4022  
Muraru, D., P750, 2862, P3363  
Murata, T., P3374, P4476  
Muratori, I., P4644  
Murday, V., P3255  
Mureddu, G.F., P1719  
Muresan, L., P4170, 5213  
Muresan, M., P4652  
Murgatroyd, F., P799  
Murialdo, M., P5669  
Murillo, M., P1641  
Murin, J., P5475  
Murohara, T., 1013, 1127, P1361, P3057, P3997, P4014, P4250  
Murphy, D., P4513  
Murphy, E., 251  
Murphy, G., P5265  
Murphy, N.F., P2516, 5047  
Murrin, C., P4027  
Murrone, A., P3348  
Murzi, B., P4788  
Murzi, M., 5160  
Musallam, A., P5689  
Muscoli, S., P4087  
Musetescu, A.E., P2219  
Musetescu, R., P1377, P2219  
Musha, H., P4756  
Mushtaq, S., P1356, P1357  
Musial, W.J., P663, P5300, P5712  
Musialek, P., P3914, P4480, P5328, P5504, P5506, P5510, P5537  
Musialowska, M., P5314  
Muskens-Heemskerk, A., P2462  
Mussio, P., P2152  
Mussner-Seeber, C.H., P2333, P2335, P4238, P4884  
Mustafina, O.E., P525  
Mustafov, L., P4595  
Musters, P., P1285  
Mustonen, E., P1417, P3376, 3773  
Musumeci, G., P1551, P2094, P4072, P4532, 5211  
Mutlak, D., 338, P5689  
Mutlu, B., P5365  
Muto, C., 1902, 1903, P5610  
Muzzarelli, S., P622, 5084  
Mvungi, R., P3798  
Myers, J., 131, 165, 2641  
Myers, S., P2085  
Myles, R.C., 241, P553, P820, P4220  
Myrmel, T., P3884  
Myszor, J., P2458  
Mytas, D., P3268  
Mzoughi, K., P2067, P2991  
N'guessan, B., P2328  
N'guyen, J.M., P4056  
N'tep, M., P3332  
Nabais, S., 1149, 2679, P2960, P3002, P3193, 4977  
Nabauer, M., P4836, P4841  
Naber, C.K., P1337  
Nabi, H., P5441  
Nadal, M., P1617  
Nadal-Ginard, B., 904, 2916, P3060  
Nadruz Junior, W., P2530, P3403, P4942  
Nadziakiewicz, P., P2343  
Naeem, K., P680  
Naeije, R., P727, P1437, P1589, 5169, 5178  
Naeije, R., P717  
Nagai, R., 2825, P3867, P5248  
Nagao, K., P532, P3818, P4630  
Nagashima, K., P4572  
Nagaswami, C., P5296  
Nagata, M., P1348, P3275, P4559  
Nagata, Y., P759  
Nagatomo, Y., P2964, P4499, P5665  
Nagaya, M., P3904  
Nagel, E., 1255  
Nagendrarajah, S., P5528  
Naghavi, M., P3921  
Nagy, A., P2415  
Nagy, E., P2442, P3280  
Nagy, V., P3280  
Nahhas, A., 250  
Nahrendorf, M., P768  
Nahum, J., P3887  
Naieje, R., P1587  
Naik, N., P777  
Nair, G.M., 1914, P2447, P4847  
Naito, K., P2964, P4499, 5143  
Naito, M., P4078  
Naka, K.K., P2103  
Naka, K.N., P2492  
Naka, T., P1421  
Naka, Y., P856, P858  
Nakae, I., 2676  
Nakagawa, A., P413  
Nakagawa, H., P4138  
Nakagawa, S., P5413  
Nakagawa, Y., P4067  
Nakai, H., P2143, P2181, 5092  
Nakai, T., P4078  
Nakajima, H., P1348, P3275, P3352, P3908, P4547, P4559  
Nakakouji, T., P3819  
Nakamori, S., P4547  
Nakamura, H., P3122  
Nakamura, M., 2817, 2934, P3275, P3352, P4559, P5437  
Nakamura, N., P469, 900, 3566, P4467  
Nakamura, S., P672, P1467, P4043, P4048, P4049, P4708, P4712, P4713, P4726  
Nakamura, T., P4547  
Nakamura, Y., P693, P5683  
Nakane, E., P4517  
Nakano, M., P3197  
Nakano, T., P3158  
Nakano, Y., P2385  
Nakano, Y.N., P3812  
Nakao, K., P3805  
Nakashiki, K., P633  
Nakashima, T., P3374, P4476  
Nakata, J., P733  
Nakata, T., 1146, P1452, P4012  
Nakaya, H., P1386  
Nakayama, K.I., 377, 5001  
Nakayama, K.I., 377  
Nalbantgil, S.N., P581  
Nalin, I., 3778  
Nallur Shivu, G., P1459, P1561, P2494, P4471, P4880, P4883, P4885  
Nam, C.W., P2142, P3216, P4184  
Nam, G.B., 1109  
Nambodiri, N., P2426  
Nana, A., P3147  
Nanas, J., P861  
Nanasato, M., P2323  
Nanna, C., P1325  
Nanni, S., P423, P424, P3858  
Nanto, S., P4060  
Napodano, M., P3173  
Napoli, A.M., P844  
Napoli, C., P590, P3946, P4598, P4623  
Napp, C., 1244  
Narancic Skoric, K., P1308  
Narang, R., P2285, P3086  
Narayan, H., 1959  
Narayan, P., 165, 2641  
Narayan, S., 3657  
Narcisse, S., 255  
Nardi, C., P1606, P4931  
Nardi, R., P3838  
Narducci, M.L., P4861  
Narendran, P., P1459, P4471, P4883  
Narita, J., P626  
Narkiewicz, K., 1017, P3139  
Naruke, T., P1560  
Naruki-Van Velzen, M., P4002  
Narula, A., P3316  
Narula, J., 393, P3012, P5468, P5469  
Narumi, H., 5001  
Naruse, H., P3010, P4067  
Naruse, K., P408  
Naruszewicz, M., P5723  
Nasibullin, T.R., P525  
Nasis, A., 1261  
Nasr, G.M., P4577, P4581  
Nassar, D., P710  
Nassar, P., P5573  
Nassar, Y., P2154  
Nassenstein, K., P1337

- Nasseri, B., P4809  
 Nassimizadeh, A., P2494  
 Nassimizadeh, M., P2494  
 Nassiri, D.K., P2148, P5552  
 Nastas, I., P2513  
 Nasu, K., P688, P1366, P1505, 2925, 3562  
 Nasuno, N., P4921  
 Nasuti, P., P3821, 5201  
 Nataatmadja, M., P5538  
 Nataf, P., P2413, P4131, 5155  
 Natale, A., P770, P1620, P2448, 3652, P5611  
 Natale, D., P4574  
 Natali, R., 5077  
 Nathan, P., 2915  
 Natoli, A.K., 5135  
 Natorska, J., P5559  
 Natsuoka, H., 2825  
 Nattel, S., P531, 3660, P5382  
 Nault, I., 3657, P4828  
 Nauman, J., P5465  
 Nauwelaers, F., P2215  
 Nava, A., 1209, P1267, P3233, P3261  
 Navaratnarajah, M., 1241  
 Navarro, L., P1318  
 Navarro Estrada, J.L., P2937  
 Navarro-Lopez, F., P3235, P3245  
 Navas-Acien, A., P1473  
 Navazio, A., P5695  
 Navin, T.J., 379  
 Navis, G., P846, P3359, P4212  
 Navratil, M., P3081  
 Nazarewicz, G.V., P3218  
 Nazerian, P., P701, P719, 5184  
 Nazeyrollas, P., P1341  
 Nazli, S., P4489  
 Ndrepepa, G., 2929, P5304  
 Nealon, A.N., P2294  
 Neath, S.X., 1098  
 Necasova, L., P1684  
 Neco, P., P3312  
 Nedeljkovic, I., P3878, P5331  
 Nedeljkovic, M., 3565, P5331  
 Nederhoff, M., P742  
 Nediani, C., P3386  
 Nedio, M., P1465  
 Nedios, S., P403, 5212  
 Nedregaard, B., P4634  
 Neefjes, L., P1285  
 Neely, G., P1390, P1391, P1402  
 Nef, H., 282, 1257, P1364, 1961, P2206, P3019, P3290, P3371  
 Nef, H.M., P843, P1406, P1545  
 Neglia, D., P537, P1597, P2475, P3237, P4550  
 Negrao, C.E., P1436, P2263, P4025, P4698, P4699  
 Negri, A., P772  
 Negro, A., P5571  
 Negro, L., P722, P1571, P1598, 5172  
 Negura, D., P510, P4814  
 Neishi, Y., P1537, P2405, P3869, 4986  
 Neizel, M., P3029  
 Nekic, D., 5066  
 Nelles, M., 2768  
 Nelson, C.P., P5306  
 Nelson, M., P2365  
 Nelwan, S.P., 5012  
 Nemchuk, F.A., 2783  
 Nemcova, I., P1684  
 Nenadic, I.Z., P481  
 Nencini, P., P5499  
 Nerla, R., P597, P2226, P4001  
 Nery, P.B., P4847  
 Nes, B.M., P3803  
 Ness, S., P3880  
 Nesto, R.W., P696, P1735  
 Nethercott, S., 1823  
 Nethononda, M.R., P4542  
 Neubauer, S., P617, P3988, P4542, 5070, P5340  
 Neubeck, L., P592  
 Neuberger, H.R., P568  
 Neudorfer, I., P4479  
 Neugebauer, A., P610  
 Neugebauer, P., P2324  
 Neuhaus, M., P2152  
 Neuhofer, C., 889  
 Neuhold, S., P828, 1901, P4216, P4224  
 Neukirch, B., P1493  
 Neumaier, M., P4870  
 Neuman, A., P1496  
 Neumann, F.-J., P4053, 5116  
 Neumann, F.-J.N., 2928  
 Neumann, F.J., 5194  
 Neumann, M., P4584  
 Neumann, T., P1585, P1624, P3325  
 Neumann-Schriedewind, P., P2068  
 Neutel, J.M., P2490  
 Neuzil, P., 234  
 Neven, K., P1644  
 Neves, J., P2320  
 Neves, J.P., 5243  
 New, G., 4951, P5481  
 Newby, A.C., P4601  
 Neyeloff, J.L., P5432  
 Neykova, A., P2111  
 Neyses, L., P1423, P1554, P3384, P5384  
 Ng, A.C.C., P677  
 Ng, A.C.T., 2054, P3873, P4102, P5272  
 Ng, C.T.A., 2044, P2139, P2186  
 Ng, G.A., P2427, P2460, P4824, P5612, P5619  
 Ng, K.M., P3339  
 Ng, L., P4249  
 Ng, L.L., 283, 1959, P3855, P5306  
 Ng Kam Chuen, M.J., P3355  
 Ngarmukos, T., P3335  
 Ngatchou, W., P3147  
 Ngetta, R., 5074  
 Ngo, D.T.M., P2233  
 Ngo, K., 1102  
 Nguyen, C.M., 1251, P3187, 5073  
 Nguyen, J., 2045, P2146  
 Nguyen, P., P603  
 Nguyen, X.D., P4636  
 Nguyen Dinh Cat, A., P3249  
 Ni, J., P2065  
 Niccoli, G., P461, P662, P697, P1271  
 Niccoli, G.P., P1314  
 Nicholson, W., P2460  
 Nicin, S., P2312  
 Nickel, T., P2213, P4541  
 Nickenig, G., 382, P563, 1247, P2188, P2423, P4592, P4600, P5371, P5402  
 Nickl, W., P4902  
 Nicolaci, L., P3023  
 Nicolai, S.P., P3164  
 Nicolardi, S., P712  
 Nicolau, J.C., 1150, P1436, 1955, P2118, P2999, P3005  
 Nicolino, A., P590  
 Nicolosi, G.L., 134, P412, P602, 1104, P2184, P2495, P2518, 2862, P4204, P4206, P5680  
 Nicolson, W., P5612, P5619  
 Niederhauser, N., P4243  
 Niehaus, M., P1657  
 Nielsen, H., 287  
 Nielsen, J.C., 1921  
 Nielsen, J.M., 5142  
 Nielsen, O.W., P1289, P3155, P4846  
 Nielsen, S.S., P2130, P5286  
 Nielsen, T.T., P2130, P4490, 5142, 5146, P5553  
 Nieman, K., P1285  
 Niemann, H., P5359  
 Niemann, M., P2159, P3897, P5359  
 Niemann, M.N., 2861, P4105  
 Niemela, M., P682, P2438  
 Nieminen, M.S., 159, P571, 2764, 5075  
 Nienaber, C., P547  
 Nienaber, C.A., P646, P666  
 Nienaber, C.H., P4106  
 Niessen, W.J., P3009  
 Niessens, H.W.M., P4895  
 Niessens, H.W.N., P3383  
 Nietlisbach, F., 5084, P5289  
 Nieto, F., P4196  
 Nieto, V., 2773  
 Nieuwlaet, R., P623, P630, P1498, 3650, P5495  
 Nieuwland, M., P3311  
 Niforou, A., P5535  
 Nigro, A., P513  
 Nigro, G., P801  
 Nihoyannopoulos, P., P500, P512, P739, P748, P752, P1576, P1612, P3872, 5167, 5170, P5362  
 Nijaradze, T., P1551, P2094, P4532  
 Nijveldt, R., P1303, P3098, P3101  
 Nikfardjam, M., P717  
 Niki, T., P1558, P4538, 4957  
 Nikitin, N., P4214  
 Nikitin, N.P., P4894  
 Nikitin, Y.U., P3940  
 Nikitin, Y.U.P., P1485  
 Nikitina, T.G., P415  
 Niklewski, T., P870, P2307, P2343, P2393  
 Nikoghosyan, K., P1726  
 Nikol, S., P4640  
 Nikolaev, V.O., P4882  
 Nikolaidou, T., P5384  
 Nikolaou, A., P3189, P3231  
 Nikolaou, K., P1540  
 Nikolaou, M., 126, P2220, P3157, P3822, P5666, P5668, P5688  
 Nikolic, D., P2970  
 Nikolopoulou, A., P3972  
 Nikolsky, E., 1957  
 Nikulina, N.N., P2302  
 Nikus, K., P2937  
 Nilsen, D.W., P1274  
 Nilsen, D.W.T., P830, P2277, P2969  
 Nilsen, T., P5465  
 Nilsson, F., P2325  
 Nilsson, M., 5235  
 Nilsson, P.M., 985, P4670  
 Nilsson, T., P3135  
 Ninci, E., P3096  
 Ninios, N.V., P2350  
 Nipote, C., P4473  
 Niquille, M., P4164  
 Nisanci, Y., 3568  
 Nishi, H., P532  
 Nishi, S., P1488  
 Nishida, H., P1386  
 Nishigaki, K., P2478, P3899, P4071, P4177, P4179, P4572  
 Nishii, M., P1560  
 Nishikage, T., P2143  
 Nishikawa, H., 2934  
 Nishimoto, M., P488  
 Nishimura, E., P652, P656  
 Nishimura, Y., P2181, P3989  
 Nishino, H., 2007, P2362  
 Nishino, S., P4921  
 Nishioka, K., P2216, P3215, P3416, P5541  
 Nishiyama, K., P814, P4262  
 Niskanen, L., P4006  
 Nissen, N., P3170  
 Nistal, J.F., P1422, 2920  
 Nitardy, A., P5624  
 Nitendo, G., P2125  
 Niwano, H., P554, 3659  
 Niwano, S., P554, 3659  
 Nixdorff, U., P3933  
 Njerve, I.U., P2088  
 Njolstad, I., P1274, P5426  
 Noack, C., P3075, P3078  
 Noble, S., P2377  
 Nobuyoshi, M., P1717, 1900, 2642, P4568, P5519  
 Nocco, S., P5589  
 Noda, T., P3904  
 Nodari, S., P3001, P4691  
 Noel, B., P3187, P4742  
 Noelker, G., P797, P4820  
 Nogami, A., P3301  
 Nogueira, C.R., P1702  
 Nogueira, C.R.S.R., P3158  
 Nogueira Da Silva, M., P5600  
 Nohara, R., P4517  
 Noiman, E., P4211  
 Noirhomme, P., 5165  
 Nojek, C., P2310, 5244  
 Noll, G., P1372, 2913, P4659  
 Noll, T., P455, P1531, P3951, P3952, P3953, P4475, P4489  
 Noman, A., 2815  
 Nombela, L.N.F., P1666

- Nombela Franco, L., P773, 3656  
 Nomura, K., P2248  
 Noor, M., 1959  
 Noordzij, W., P3265  
 Nor Hanim, M.A., P3109, P4539  
 Nordbeck, P., P768, P3026  
 Nordestgaard, B.G., 2019  
 Nordmann, A.J., 1103  
 Nordrehaug, J.E., 128, 293, P1274, P1295, P3811, P4523, P4527  
 Norell, M., P2089  
 Noren, K., P2459  
 Nores-Lorenzo, A., P1449  
 Norgaard, B.L., P5290  
 Norgaard, M.L., 1821, P2290, P3130  
 Norhammar, A., P640  
 Norisada, K., P5605, P5650  
 Norton, M.Y., P4586  
 Nosaka, H., P4568  
 Notarangelo, F., P540  
 Notaristefano, S., P3177, P5292  
 Noto, T., P3188  
 Novakovic, A., P2126  
 Noveanu, M., P4201, P4213, P4240, P4243, P4878, 5078  
 Novo, G., P782, P4644  
 Novo, S., P782, P4526, P4644  
 Novoa, J., 5198  
 Novoa Medina, J., P5623  
 Nowak, J., P749, P4209  
 Nowak, K., P663, P5300  
 Nowak, M., P1343  
 Nowak, R., P816, P823, 1098, 2771  
 Nowak, W., P3935  
 Nowakowski, A.M., P3054  
 Nowalany-Kozielska, E., P451  
 Nozadze, P.A., P620  
 Nozynski, J., P5309  
 Ntalarizou, E., P4930  
 Ntalianis, A., 340, P1334, P1527, P1535, 3564, P4752  
 Ntsekhe, M., P5577  
 Nucifora, G., P1382, P1451, P1521, P1705, 2044, P2156, P2157, P2186, P3873, P3876, P4546, P4622, P4654, 5094, 5125, P5642  
 Nunan, D., P2334, P2336  
 Nunan, David, P3048  
 Nunes, H., P2296  
 Nunes, J.P., P1599  
 Nunes, L., 1107  
 Nunes, M.C.P., P1695, P4906  
 Nunes Alves, M.J.N., P4699  
 Nunes Da Silva, S., 5236  
 Nunes Diogo, A., P746  
 Nunez, I., P566  
 Nunez, J., P430, P1275, 3567, P4725, 5112  
 Nunez, L., P3253  
 Nunez Garcia, A., 5011  
 Nunez-Gil, I., P2397, P2401, P4183  
 Nurdan, K., P1370  
 Nurdan, T.C., P1370  
 Nurzynska, D., P2972, P3061, P3065, P3076  
 Nusca, A., P3232, P4703  
 Nuyens, D., P1644, P4832  
 Nuzzo, A., P728, P4003  
 Nuzzo, A.C., P3994  
 Nycz, K., 1259  
 Nygaard, M.L.N., P1440  
 Nygaard, O., P1295  
 Nygard, O., P1274  
 Nygard, S., P1410  
 Nyktari, E., P829  
 Nyktari, E.G., 2761, P3886  
 Nylen, E.S., 2641  
 Nyman, K., P682  
 Nyolczas, N., P3791, P4039, P4233, P4234  
 Nyrmes, A., P5426  
 Nystrom, U., P2325  
 Nyyssonen, K., P3160  
 O'Connor, K., P2399, 2864, P4093, P5326, P5333, P5335, P5336  
 O'Donnell, M., P4847  
 O'Donoghue, M., P3008  
 O'Halloran, K., P4847  
 O'Hanlon, R., P1262, P4551, 4973  
 O'Hare, P.J., P2210  
 O'Kelly, N.J., P5684  
 O'Loughlin, C., P2516  
 O'Mahony, D., P4027  
 O'Malley, B., 3531  
 O'Malley, S., P3921  
 O'Neill, L.A.J., 2017  
 O'Nunain, S., P4643  
 O'Regan, D., 5170  
 O'Rourke, B., 5051  
 O'Shea, D., P2537  
 O'Sullivan, J., P5265  
 O'Sullivan, M., P834  
 Oba, K., P3805  
 Oba, M., P4517  
 Obase, K., P1537, P2405, P3869  
 Obenauer, S., P706  
 Oberdanner, J., P4605  
 Oberdorf-Maass, S., 2921  
 Oberheiden, T., P4636  
 Oberndorfer, T.H., P2333  
 Obers, S., P2422  
 Oberson, M., P1372  
 Oberti, P., 336  
 Obici, L., P4910  
 Obregon, R., P3037  
 Obregon, S., P3926  
 Obunai, K., 5196  
 Oceandy, D., P1423, P3384, P5384  
 Ochala, A., P3068  
 Ochoa, J.M., 391  
 Odaira, M., 170, P2280, P4015, P4017, P4671, P5438  
 Oden, A., 5235  
 Oechslin, E., P3244  
 Oechslin, E.N., P4763  
 Oeff, M., 3651, P4841  
 Oehler, E.A., 3774  
 Oeltze, S., P5636  
 Oelze, M., P3957  
 Oemrawsingh, R.M., P639, P5464  
 Oerlemans, M.I.F.J., P1428  
 Oezcelik, C., P3245, P3254  
 Offermanns, S., P1447  
 Ogasawara, D., P1517, 3563  
 Ogata, K., P2105  
 Ogawa, H., P672, P1467, P4043, P4048, P4049, P4708, P4712, P4713, P4726  
 Ogawa, K., 394  
 Ogawa, M., P4707  
 Ogawa, S., P2248, P2964, P3183, P3950, P4499, P4754, 5143, P5486, P5665  
 Ogayar Luque, C., 1951  
 Ogihara, T., P3805  
 Ogimoto, A., P4062  
 Ogura, R., P471, P2119  
 Ogura, S., P2483  
 Oguri, M., 1013, P3997  
 Oguz, A.E., P2411  
 Oguz, D., P2382  
 Oguzhan, A., P1536, P2533, P3362  
 Oh, B.-H., P4647  
 Oh, J.K., 1096  
 Oh, S.-I., P487  
 Oh, Y.S., 5106  
 Ohanessian, G., P506  
 Ohara, G., P2181  
 Ohara, M., P4520  
 Ohara, Y., P488  
 Ohashi, N., P1360  
 Ohe, T., P1514, P4520  
 Ohkawara, H., P4477, P5372  
 Ohkubo, T., P4754  
 Ohlmann, P., P1307, P1312, 5069  
 Ohlsson, C., 5050  
 Ohman, E.M., 1957, P3850  
 Ohmiya, K., P4756  
 Ohno, T., P2483  
 Ohrvik, J., P3003  
 Ohsawa, M., P5437  
 Ohshima, K., 1127, P5318  
 Ohshima, S., 393  
 Ohtaki, Y., 400, P4573  
 Ohtani, R., P471, P5302  
 Ohte, N., P445  
 Ohtsuka, T., P4062  
 Ohtsuki, K., 394  
 Ohyanagi, M., P1421  
 Oie, E., 243, P824, P1674  
 Oieru, D., P1362  
 Oikarinen, L., P571  
 Oikawa, F.T.C., P4172  
 Oikawa, Y., 2925  
 Oikonomou, K., P5662  
 Ojeda, S., 2000, P2369, 5192, 5199  
 Ojio, S., P4071, P4179  
 Okabe, T., P3819, P3950, P4074  
 Okada, K., P1361  
 Okada, M., P5605, P5650  
 Okada, T., P480, P3215, P5541  
 Okada, Y., P626  
 Okado, T., P476, P3983, P4667, P4678  
 Okahashi, N., P1537  
 Okai, I., 284  
 Okajima, K., 5129, P5628  
 Okamura, T., P1509, 2930, P4073, P4077, P5683  
 Okawa, K., P4520  
 Okayama, A., P5437  
 Okayama, H., P4062  
 Okazaki, M., P3199  
 Okazaki, S., 284  
 Oki, K., P3416  
 Okin, P.M., 159, P866, 1015  
 Okino, S., P437  
 Okorie, M.I., P4507  
 Okoshi, K., P1673, P1696, P1702, P1708  
 Okoshi, M.P., P1673, P1696, P1702, P1708  
 Oksala, N.K.J., P5430  
 Okubo, M., P3899, P4071  
 Okui, H., P633  
 Okumura, M., P3010, P4067  
 Okumura, T., 1127, P1359  
 Okuno, Y., P402  
 Okura, H., P2405, P3869, 4986  
 Olasinska, A., P3196, P3964  
 Olasinska-Wisniewska, A., P2396  
 Olaya, A., P3292  
 Oldenburg, O., P1268, P1675, P3307, P4226, P4909, P5693  
 Oldroyd, K.G., 1254, P4751  
 Olesen, J., P5442  
 Olesen, J.B., P2299, P4684  
 Oleszczyk, K., P440  
 Olgunturk, R., P2382  
 Oliana, F., P4837  
 Olieslagers, S., P3111  
 Olimulder, M.A., P599  
 Olinic, D.M., P5697  
 Olinic, M., P5697  
 Olinic, N., P5697  
 Oliva, M.J., 1211  
 Olivari, Z., P3177, P4109, P4123  
 Oliveira, F.A., P5432  
 Oliveira, J.A., P421, P2939, P2941  
 Oliveira, J.F., P2314  
 Oliveira, J.M., P4026  
 Oliveira, M., P5600  
 Oliveira, P., P4814  
 Oliveira, R., P4018  
 Oliveira, S.M., P2317  
 Oliveira Junior, S.A., P1702, P1708  
 Oliveira Santos, J., 1107  
 Oliver, J., P4786, P4790  
 Olivier-Faivre, L., P5543  
 Oliviero, U., P2240  
 Olivotto, J., P3273  
 Olmetti, F., P4232  
 Olsen, M., P4770, P4774  
 Olsen, M.H., P5455, P5570  
 Olsson, J., P3350  
 Olsson, A.G., P2245  
 Olsson, S.B., P4851  
 Olszanecka, A., P3415  
 Olszewska, M., P663  
 Olszewski, R., P5340  
 Olszowska, M., 2009, 3642, P3881, P5328

- Oltrona Visconti, L., P3222  
Olympios, C., P5666  
Omar, E., P2537  
Omar, S., P710  
Omar, S.H., P798  
Ombandza-Moussa, E., 1954  
Omede, P., P4057  
Omerovic, E., P648, P1741, 5050  
Omland, T., P824  
Omori, Y., P2196  
Onate, B., P3112  
Onder Isik, I., P4192  
Ondruch, A., P4772, P4783  
Oner, G., P1290  
Onerup, A., P5411  
Ong, H.Y., P627, 2645, P4580, P5459  
Ong, P., 5087  
Ong, P.E., P1282, P4548  
Ong, T.K., P3109, P4539  
Ongun, A., P2225  
Onishi, K., P3275, P3352, P4547, P4876  
Onishi, T., P5605, P5650  
Onkelinx, S., P615, 4967  
Ono, K., P532, P3904  
Onorato, E., P2346  
Onuki, T., P2470  
Onuma, Y., P639, 897, P1509, P2100, P3205, P3857, P4030, P4045, P4046  
Onut, R., P750, P3363  
Onwochei, D.N., P4160  
Ooi, G.C., P4565  
Ooi, K.Y., 1824  
Oomen, J.P.C.M., P3047  
Oort, F.J., P4764  
Ootake, H., 3563, 4953  
Op 'T Roodt, J., P2242  
Op Den Akker, J.W., P3031  
Opdahl, A., 292, P2175, P5631  
Opie, L.H., P4486  
Opitz, A., P4126  
Opitz, E., P5580  
Opolski, G., 392, P756, P1328, P1562, P3849, P4843, P5273, P5315, P5337  
Opolski, M.P., 2933  
Oppermann, M., P2222  
Oprea, A.D., P4574  
Or, J., P1362  
Orczykowski, M., P1661, P4163  
Orda, A., P4920  
Ordodi, V., P1395  
Ordonez, B., 883  
Ordonez, J., P2525  
Ordoubadi, F., P1554  
Ordovas, J.M., P1473, P4655  
Ordu, S., P4268, P4468  
Orhan, E., P4241, P5599  
Orlando, G., P4571  
Orlov, G., P3941  
Orlov, M., 2774  
Orlowska-Baranowska, E., P4125  
Ormerod, J.O.M., 3639, P3965  
Ormerod, O., P2368  
Ormiston, J., 2923  
Orn, S., P5313  
Ornelas, I., P533, 3775, P4642, P4683  
Oros, A., P3312  
Orosa, P., P864, P4259  
Orosan, R., P4652  
Orpin, J., P3257  
Orszulak, W., P1661, P2458  
Orszulak-Michalak, D., P1293, P1297  
Ortak, J., P547, P815  
Ortega, J.R., P4718  
Ortigosa, J., 3656  
Ortigosa Aso, F.J., P773  
Ortiz, J., P3291, P3302, P3305  
Ortiz, J.T., P2983, P3292, 5147  
Ortiz, M.F., P3253  
Ortu, F., P5589  
Os, I., P4230  
Osada, N., P565, P612, P4640, P4756  
Oslizok, P., P783  
Osman, F., P4824, P5612, P5619  
Osmancik, P., P791, P2446  
Osmonov, D., P3182  
Osswald, S., 247, P669, P3304, 5126  
Osswald, S.O., P4855  
Ostad, M.A., P2238  
Osterode, K., P3958, P4063  
Ostgren, C.J., 985  
Osto, E., 384, 1003, P4761  
Ostojic, M., P427, P443, P2126, P2433, P3117, P3322, 3565, P3878, P3985, P4194, 5208, P5269, P5331  
Ostuji, Y., P2181  
Ostuni, M.A., P1384  
Oswald, H., P849  
Oswald, U., 5093  
Ota, H., P2248  
Otaegui, I., P4058  
Otaka, M., P3323  
Otani, K., P2181, 5092  
Otani, N., P4921  
Otawa, K., P5655  
Oteo, J.F., 3656  
Otero-Ravina, F., P1449, P5530  
Othonos, N., P5384  
Oto, A., P1353  
Otomo, K., P759  
Otsuji, Y., P2143, P3199, 5092  
Otsuka, N., P4583  
Otsuru, S., P690  
Ottani, F., P4738, P5267  
Ottaviano, A., P4206  
Otten, A., P4129  
Otter, W., P2997  
Otterstad, J.E., P2281, P3912  
Ottervanger, J.P., P3213, P3214, P5264, P5291  
Otto, S., P2145, P3907, P4923, 4979, 4982  
Opp, J., P3022  
Ouchi, Y., P2248, P3950  
Oudiz, R., 5173  
Oudiz, R.J., P1588  
Ouerghi, S., P2067  
Ould Isselmou, K., P2316  
Ouyang, F., P754, P757, P1644, P2429, P4832  
Overland, B., P5678  
Overtoom, T., P737  
Ovize, M., P1587, P3870, P3875, P4491, P4892  
Ovroutski, S., P4812  
Owen, A., 979, 986  
Oxborough, D.L., P5361  
Oz, M., P856  
Ozaki, Y., 2934, P3010, 3561, P4067  
Ozawa, T., P4554  
Ozben Sadic, B., P5365  
Ozcelik, C., P526, P3240  
Ozdemir, A.O., P1539  
Ozdemir, M., P832  
Ozdemir, N., P5322, P5325  
Ozdol, C., P1539, P2225  
Ozer, O., P3182  
Ozhan, H., P4268, P4468  
Ozin, B., P2237, P2430, P5648  
Ozkan, A., P1584, P1600, P1605, P1611, P5322, P5325  
Ozkan, M., P2411, 2770  
Ozkutlu, H., P1353  
Ozono, K., P626  
Ozova, E.M., P2497  
Ozturk, R., P3195  
Ozveren, O., P1605, P1611, P5322  
Pa, Q., 1959  
Paajanen, T.A., P5430  
Pacaud, P., P4056  
Pacaud, F., P2291, P2292, P2300, P4026  
Pace, B., P436  
Pache, J., P684, 2931  
Pacher, R., 285, P828, 1901, P3820, P3837, P4216, P4224  
Pacher, V., P655  
Pachinger, O., P1347, P1350, P1390, P1391, P1401, P1402, P2344, P4238, P4626, P4662, P4884, 5241  
Pacho, S., P704, P707, P747  
Pacholewicz, J., P2307  
Pachon, M., P3342, 5102  
Pacileo, G., P2370, P3248  
Paczkowska, E., P3068  
Paczwa, P., P3139  
Padeletti, L., 1899, 1902, P5610  
Padeletti, M., P4470  
Padley, R.J., P2246, P2287  
Padmanabhan, N., P820  
Padmanabhan, S., P5679  
Padovani, C.R., P1708  
Padro, J., P564  
Padro, T., P1450, P3007, P4614, P5416  
Paelinck, B., 4965  
Paelinck, B.P., P5332  
Paetsch, I., P3027  
Paez-Maletz, I., P4600  
Paganelli, F., P1346  
Pagani, M., P1429  
Paganoni, A., P5317  
Page, R.L., 2779, 2781  
Page, S.P., P1566, P3257, P3281  
Paglia, A., 1155, P1314  
Pagliani, L., P450  
Pagliariccio, G., P4620  
Paglino, G., P2455  
Pagonas, N., 2818  
Pagoni, S., P4933  
Pahissa, A., P4111  
Pai, P.-Y., P2261  
Paiardi, S., P549  
Paillard, E., P3369  
Paini, A., P862, P4910, P4927, P4939, P5471  
Paixao, E., P2297  
Pajak, A., 1795, P2269, P3161, 3535  
Pajitnev, D., P1624  
Pajuelo, C., P1721, P4219  
Pak, Y., P1276, 5115  
Pala, S., P3326  
Palada, I., P2223  
Paladini, B., 236, P719  
Paladino Junior, J.R., P1673  
Palagi, C., P1606, P4931  
Palano, F., 5002  
Palatini, P., 160, P4837  
Palazzini, M., P722, P1571, P1598, 5172  
Palazzuoli, A., 1102, P1490, P3893  
Palecek, T., P720, P1729  
Palella, F., P4571  
Pali, S.Z., P545  
Palinkas, A., P2442, P3280  
Palios, I., P3106  
Palios, J., P2241  
Paliou, C., P1486  
Palit, F., P2173  
Palloshi, A., P5520  
Palma, M., P4771, P4781  
Palma Dos Reis, R., P533, 3775, P4642, P4683, P4687  
Palmer, B.R., P541  
Palmerini, E., P1490, P4470  
Palmerini, T., P1549, P4723, P5268  
Palmieri, C., P5505  
Palmieri, R., P4837  
Palmiero, P., P5338  
Palmisano, P., P584  
Palombo, C., P1429, P1454, P4650  
Palsson, R., P3338  
Palumbo, A.A., P1352  
Palumbo, G.L., 1019  
Palumbo, V., P5499  
Palus, S., 239  
Paluszek, P., P5504, P5510  
Pan, C.Z., P520, P2363  
Pan, H., P475  
Pan, K., P2502  
Pan, M., 2000, P4718, P4801, 5192, 5198  
Pan, W.Z., 2777  
Pan Alvarez-Osorio, M., P2369, 5199, P5320  
Pan Alvarez-Osorio, M., P2481  
Panagiota, V., P3096  
Panagiotakos, D., 1014, P1486, P1489, P2228, P3126, P3975, P3981, P4692  
Panagiotakos, D.B., 3539  
Panagiotou, A., P2282  
Panagiotou, M., P2321

- Panagopoulos, G., P2348  
 Panagopoulos, P., P2241  
 Pancani, R., P1597  
 Panchenko, E., P4693  
 Panchenko, E.P., P2439  
 Panchetti, L., P4553  
 Pandini, C., P2479  
 Pandis, D., P739  
 Paneni, F., 5002  
 Paniagua, J., 343  
 Paniagua-Martin, M.J., P840  
 Paniccia, R., P1325  
 Panier, B., P1442, P5467  
 Panja, N., P5532  
 Pankuweit, S., P3254, P3279, P3286, P4238, P4884, 5233, P5591, P5670  
 Pannier, B., P5424, P5444  
 Panou, F., P2230  
 Panovsky, R., P3081  
 Pantaleoni, M., P5695  
 Pantano, P., P3348  
 Pantely, G., P4803  
 Panther, F., P3365, P3366  
 Pantos, C., P5664  
 Panuccio, D., P3838  
 Panza, A., P5487  
 Panzenboeck, A., P724, P3409, P5568  
 Panzenboeck, H., P715  
 Panzer, S., P713, P1323  
 Paolicchi, A., P5567  
 Paolillo, S., P5540  
 Paolucci, N., P2475, P5406  
 Papadaki, H., P529, P5397  
 Papadakis, M., P2508, P2520, P3124, P4239  
 Papadimitriou, C., 5044  
 Papadimitriou, L., 1014, P1446, P2265, P3126, P4692  
 Papadodima, S.A., P5490  
 Papadomanolakis, A., P5396  
 Papadopoulou, A., P2241  
 Papadopoulou, C., P2169, P5348  
 Papadopoulou, D., P3975  
 Papadopoulou, D.P., P460, P608, P2283, P3399, P3401, P3404, P4024, P4681  
 Papadopoulou, E., P4162, P5674  
 Papadopoulou, K., P4813  
 Papageorgiou, I., P1398  
 Papageorgiou, N., P524, P536, 1023, P1287, P2109, P2200, P3917, P3929, P3972, 4998, P5550  
 Papagiannis, J., P4813  
 Papaioannou, I., P3126  
 Papaioannou, T., 164, P2364, P2538, P3898, P4944, 4984, P5417  
 Papaioannou, T.G., P3044, P3921  
 Papalambros, A., P5535  
 Papalois, A., P1383  
 Papamichael, C., P5446  
 Papamichael, C.M., P4944  
 Papamichael, N.D., P2103  
 Papandreou, A., P1663  
 Papaphylactou, M., P4765, 5180  
 Paparella, G., 1110  
 Papassotiriou, J.A., P4911  
 Papastasinou, C., P625, P879  
 Papathanasiou, A., P658, P1552  
 Papathanasiou, M., P2138  
 Papatheodorou, S., P4697  
 Papavassiliou, T., P3364, 3641  
 Papazachou, O., P608, P2283, P3399, P3401, P3404, P4024, P4681  
 Papazoglou, D., 898  
 Papazoglou, G., P5550  
 Papdakis, M., P600  
 Papiashvili, G., P5608  
 Papila-Topal, N., P5365  
 Papousek, F., P3349  
 Papparella, I., P3971  
 Pappas, L., P3268  
 Pappas, T.H., P658, P1552  
 Pappone, C., P784, P2431, P2455  
 Papurica, M., P1395  
 Paradis, S., P1384  
 Paradiso, V.P., P5493  
 Parahuleva, M., P463, 889, P3953  
 Parakevaidis, I., 5144  
 Paramo, J.A., P1518  
 Paranon, S., P506  
 Paraschos, S., P1484  
 Paraskevaidis, I., P2169, P2220, P4900, P5348  
 Parati, G., P1427, P1435, P3042, P3807, P5694  
 Paravolidakis, K., P3208  
 Pardini, S., P4508  
 Pare, C., 5147  
 Pare, J.C., P3235  
 Paredes, M., 977  
 Pareja, J.C., P4019  
 Parekh, N., 2771  
 Parenica, J., P2987, P4227  
 Parga, J., P2271  
 Parger, H., P4878  
 Parharidis, G., P3936  
 Parhofer, K.G., P3974, P5436  
 Parise, H., P645  
 Parish, V., P4796  
 Parisi, K., P2282  
 Parissis, H., P2144  
 Parissis, J., P4900, 5079  
 Parissis, J.T., 126, P3157, P3822, P4926, P5666, P5668, P5688  
 Parizel, P., P4004, P5431  
 Park, D.-W., P3198  
 Park, D.W., 4952  
 Park, H.-E., P487  
 Park, H.N., P3900  
 Park, H.S., P2142, P3216, P4184  
 Park, H.W., P2436, P4152  
 Park, H.W.P., 1111  
 Park, I.K., P543  
 Park, J.-S., P2108  
 Park, J.C., P543, P2436, P2993, P3093, P4152, P5358  
 Park, J.C.P., 1111  
 Park, J.L., P2289  
 Park, J.S., P1380, P1553, P2172, P4016, P5354  
 Park, K.H., 3560, 4988  
 Park, K.S., P5323  
 Park, K.W., P4728  
 Park, S.-J., P3198  
 Park, S.-W., P3198  
 Park, S.D., P5323  
 Park, S.J., P2289, P2982, P4118, 4952  
 Park, S.K., P4728  
 Park, S.M., P1511, P3900, P4066  
 Park, S.W., P4118, 4952  
 Park, S.Y., P2289  
 Park, Y.-B., P4647  
 Park, Y.W., P4168  
 Parker, D., P4819  
 Parker, H., P4744  
 Parker, J.D., P1731  
 Parker, M., P3246  
 Parker, T.L., P1488  
 Parkhomenko, A., P2959, P3851, P5271  
 Parkhomenko, A.N., P2135  
 Parodi, G., P665, P3023, 4950, 5197  
 Parodi, O., P4526  
 Parra, G., P606  
 Parras, J.L., P3037  
 Parreira, L., P1640, P1642  
 Parreno, R., P2246  
 Parri, M.S., P4628  
 Parsaee, M., P2417  
 Parsai, C., P459  
 Parthenakis, F., P829, P3049  
 Parthenakis, F.I., P2252, P2257, P2259, 2761, P3886  
 Partsch, S., P3394  
 Partyka, L., 4955  
 Parviz, B., P463  
 Parvizi, R., P2319  
 Parzonko, A., P5723  
 Pasanisi, E., P4788, P5347  
 Pascale, P., P4865  
 Paschalidou, E., 2640  
 Pascotto, A., P4132, P5489, P5507  
 Pascual, D., P4229  
 Pascual, I., 883  
 Pascual, T., P3167, P4231  
 Pascual Figal, D.A., P2525  
 Pascual-Figal, D., P4207  
 Pasic, M., 1004, 1005, P4133  
 Pasini, A., P2278  
 Pasotti, E., P1281, P4560, 5067  
 Pasotti, M., P486, 1212, 5039, P5484, P5671  
 Pasowicz, M., 1259, P4480, P5328, P5537  
 Pasqualucci, D., P5589  
 Pasquet, A., P4104, 5165  
 Pasquetto, G., P1266  
 Pasquie, J.L., P5586  
 Passino, C., P822, P827, P1680, 2767, P3360, P3414, P4553, P4788, P5368  
 Pasterkamp, G., 381, 893, 1246, 2017, 2018, 2911, P3104, P3105, P3107, P3920, P4488, P4501, P4601, 5227, P5387, P5404  
 Pastor-Perez, F.J., P1318  
 Pastore, G., P795  
 Pastormerlo, L.E., P1680, 2767, P5368  
 Pastuszczyk, M., P5303  
 Patane, L., P685, P2066  
 Pate, G., P4493  
 Patel, A., 1018  
 Patel, B., P1532  
 Patel, D., P770, P1620, P2448, P4188  
 Patel, J.V., P5532  
 Patel, K., P3346, P4880, P4885, P4891, P4901  
 Patel, M., P4198  
 Patel, N., P531, P5381, P5382  
 Patel, N.R., 248, 250  
 Patella, F., 388  
 Patella, M.M., P1565  
 Paterna, S., 5046  
 Pathak, A., P3828, P3835  
 Pathmanathan, R.K., P5612  
 Patialiakas, A., P449, P5298  
 Patino Bahena, E., P2375  
 Paton, S., P3085  
 Patrianakos, A.P., P829, P2257, P2259, 2761, P3886  
 Patricio, L., P2941  
 Patsa, C., P1324, P2321, P4730  
 Patsa, C.H., P2955  
 Patsch, J., P2189  
 Patsch, J.R., P4605  
 Patsourakos, N., P3163, P4031  
 Pattakos, E., P2321  
 Pattenden, J.F., 5008  
 Patti, G., P3175, P3232, P4534, P4703  
 Patuelli, G., P4799  
 Paul, D., P4479  
 Paul, M., P565, P3252, P4640, 5093  
 Paul Hjerm Dahl, P.H., P1727  
 Paule, P., P5582  
 Pauletto, P., P5561  
 Paulitsch, F.S., P2069, P2071, P2318, 5189, 5238, P5480  
 Paulsson-Berne, G., P4608  
 Paulus, W., P4895  
 Paunovic, D., P2077  
 Pauriah, M., P4518  
 Pauschinger, M., P4157  
 Pavan, D., P602, P2184  
 Pavie, A., P516  
 Pavin, D., 5122  
 Pavkova, L., P791  
 Pavli, E., P4711  
 Pavlicek, M., P2164  
 Pavlidis, A., P2268  
 Pavlidis, P., P4507  
 Pavlopoulos, H., P752, P1612, 5170  
 Pavlova, T., P1296  
 Pavlovic, D.J., 2000, P4801, 5192  
 Pavlovic, K., P2312  
 Pavlovic, R., P619  
 Pavlovic, S., 3565  
 Pavo, N., P5405  
 Pawarova, B., 5057  
 Pawlak, A., 1125  
 Pawlak, S.Z., P2307, P2343  
 Pawlowska-Jenerowicz, W., P3977  
 Pawlowski, K., P2116  
 Pax, A., 291

- Paya, R., P4259, P4540, 5080  
 Payot, L., 5200  
 Pazdan, A., P1320  
 Pazhenkottill, A., P2078, P4562  
 Paziand, O., P1648  
 Pazos, P., 2047, P5350  
 Pazysynski, T., P4847  
 Pazzano, A., P5343  
 Peacock, W.F., P816, P823, 1098, P5686  
 Pearce, K.A., P2400, 2865  
 Peasey, A., P2543  
 Peck, K.R., P4118  
 Pecoits-Filho, R., P3103  
 Pedarnig, K., P1347, P1401  
 Pedeletti, L., 1903  
 Pedersen, A.K., P1639  
 Pedersen, C.T.P., P1440  
 Pedersen, E.M., P4816  
 Pedersen, E.R., P1295  
 Pedersen, F., P3226  
 Pedersen, S., P1556, 5206  
 Pedersen, S.S., P5526  
 Pedersen, T., P3136  
 Pedersen, T.R., 5163, P5570  
 Pedone, C., P3838  
 Pedone, V., P3838  
 Pedowska-Wloszek, J., P704, P707, P747  
 Pedrazzi, P., 2643  
 Pedrazzini, G., P3067, P3070, P4560, P4646, 5067  
 Pedrazzini, G.B., P1281, P3824  
 Pedri, S., P1429  
 Pedrigi, M.C., 5056  
 Pedrinelli, R., P4931  
 Pedrizzetti, G., P2180, P3896  
 Pedrosa, V., P4784, 5161, P5492  
 Peek, N., P587  
 Peeters, W., 893, P3920  
 Peetz, D., P1476  
 Pegg, T.J., P5340  
 Pego, J., P734, 2677  
 Pego-Fernandes, P.M., P5699  
 Pehrson, S., P1622  
 Pehrsson, K., 2820  
 Peichl, P., P3324, 5107  
 Peinado, R., P3299  
 Peiris, D., 1018  
 Pelargonio, G., 2776, P3260, P4861, P5611  
 Pelizzoni, V., 252, 256, P3814, P3815, P4155  
 Pelka, M.M., P5485  
 Pell, J.P., P4665  
 Pella, D., P1474, P2255  
 Pellegrin, M., P3801  
 Pellegrinet, M., P4837  
 Pellegrino, P.L., P4191  
 Pellikka, P.A., P2171, P3880  
 Peloso, R.E., P3037  
 Pels, K., P3212  
 Pelster, B., 382  
 Pena, A., P1333, 5207, P5296, P5635  
 Pena, A.N.A., 5200  
 Pena, E., P465, P2194  
 Pena, L., P3299  
 Pena-Conde, L., 289  
 Pena-Hernandez, J., 5128  
 Pencheva, G., P708  
 Penco, M., 1095  
 Pendenza, G., P2354  
 Pendyala, L., P4603  
 Peng, X., P405  
 Penicka, M., P2402  
 Penn, M., P3826  
 Pennanen, H., P1417  
 Pennato, B., P2264  
 Pennec, P.Y., P2074  
 Pennell, D.J., P1262, P3174, P3178, P3285, P4551, P4618, 4973, P5398  
 Pennetta, R.A.P., 1011  
 Penninger, J., P4497  
 Penninger, J.M., P1390, P1391, P1402  
 Penno, G., P1458, P3949  
 Penny, A., P5602  
 Pensa, C.E., P2310, 5244  
 Pentead, C.F., P3806  
 Pentead, I.M., 1925  
 Penzel, T., P4195  
 Pepe, A., P827, P2080, P3028, P4543, P4879  
 Pepe, G., 236, P701, P714, 5184  
 Pepe, P., P2080  
 Pepi, M., P1356, P1357  
 Pepke-Zaba, J., 2672  
 Pepper, C.B., P5361  
 Pepper, J., P4745  
 Perakaki, R., P3049  
 Perazzolo Marra, M., P1267, P1371, P3173, P3261, P5579  
 Percival, F., P4513  
 Perea, F.M., P5661  
 Perea, P., P3302  
 Pereg, D., P456, P2954, P5451  
 Pereira, A., P533, 3775, P4642, P4683, P4687  
 Pereira, A.C., P458, P534, P538, P2318, 5191  
 Pereira, D., 2651, P4018  
 Pereira, M., 2679, P2960  
 Pereira, T.R.P., P4172  
 Pereira Machado, F., P3038, P5281  
 Pereira Nunes, M.C., P847  
 Pereira-Goncalves, N.S., P411  
 Pereira-Machado, F., P3227  
 Perera, D., P680  
 Peretz, A., P4576  
 Perez, A., 2916, P3060, P3299  
 Perez, D., P3291, P3302, P3305, P5608  
 Perez, E.P.P., P1666  
 Perez, G., P1501  
 Perez, G.A., P3133  
 Perez, J., 5080  
 Perez, P., P3292  
 Perez Castellano, N., P566  
 Perez De Isla, L., 343, P491, P492, P2304, P2397, P2401, P3039, P4183, P5329  
 Perez De La Isla, L., P1543  
 Perez De Prado, A., 2926  
 Perez Del Villar Moro, C., 5011  
 Perez Pereira, E., 3656  
 Perez-Andreu, V., 1953  
 Perez-David, E., 1114  
 Perez-Isla, L., P4563  
 Perez-Martinez, C., 2916, P3060  
 Perez-Rodon, J., P1721, P4219  
 Perez-Villa, F., P5691  
 Perez-Villacastin, J., P566, 1910  
 Perian, M., P1434  
 Periat, D., P1372  
 Perinazzo, A., P1355  
 Perings, C., 5221  
 Perlingeiro, P.S., P4698  
 Perlini, S., 344  
 Perlmutter-Weiser, M., P2391  
 Permanyer, G., P4036  
 Permentier, L.M., P5614  
 Perna, E.R., P4223  
 Perna, G.P., P4575  
 Perneby, C., P1727  
 Pernot, M., P479  
 Pernow, J., P3961, P4484  
 Peroutka, Z., P2446  
 Perrea, D., P2200, P4681  
 Perri, C., P479  
 Perrino, C., P1408, P1686  
 Perron, J., 5237  
 Perrone, S., P3229  
 Perrone, T., P4839  
 Perrone Filardi, P., P4000  
 Perrone-Filardi, P., P5540  
 Perrot, A., P526, P3240, P3241, P3245, P3254  
 Perry, R.A., P4041, P4103  
 Perucci, C.A., P1719  
 Peruga, J., 4992  
 Peruga, J.Z., P645, P3064, P3863, P5314  
 Perunicic, J., P427, P443, 5208, P5269  
 Peruzzi, C.A.U., P4172  
 Perz, S., 1108  
 Perzborn, E., P2106  
 Pescariu, S., 2052  
 Pescatore, V., P3250  
 Peset, A.N.A., 5180  
 Peszek-Przybyla, E., 4948  
 Peteiro, J., P596, 2047, P5350  
 Peter, K., P4479  
 Peters, A., 1108  
 Peters, B., P4812  
 Peters, K., P1563  
 Peters, R., P4844, 4997  
 Peters, R.J.G., P3123  
 Peters-Krabbendam, I., P3209  
 Petersen, H., P3040  
 Peterson, S., P2475  
 Petersson, K., P1480  
 Petersson, S., 5166  
 Petersson, U., 985  
 Pethig, K., P1493  
 Peti-Peterdi, J., P1431  
 Petillo, F., P4095  
 Petillot, D., P5332  
 Petkar, S., 245  
 Petnehazy, O., P3791  
 Petr, R., P1272, P3200, 4990  
 Petracci, B., P5641  
 Petraco, R., P4766, P4768  
 Petras, Z., P3791, P5405  
 Petrasinovic, Z., P5331  
 Petrela, E., P2976  
 Petrescu, L., P414, 2052  
 Petrie, M.C., 241, P820, P4220  
 Petrioli, A., P714, P719  
 Petronio, A.S., 4992, 5195, P5505  
 Petrou, P., P2268  
 Petrov, A., 393  
 Petrov, D., P708  
 Petrovic, M., P3878  
 Petrovic, O., P3878  
 Petrulioniene, Z., P3999  
 Pettersen, A.A., P2088  
 Pettersen, R.J., 293, P3811  
 Pettersson, G., 147  
 Pettinato, C., P3239  
 Petzelbauer, P., P715, P2965  
 Peuhkurinen, K., 2764  
 Peuhkurinen, K.J., 5075  
 Pezawas, T., 345, P860, 5214  
 Pezzali, N., P1659, P5638  
 Pezzano, A., P2174  
 Pfaff, D., P2202  
 Pfeffer, M., P5568  
 Pfeffer, M.A., P4202, 5081  
 Pfeifer, A., 1247  
 Pfeifer, D., P5375  
 Pfeiffer, B., P610  
 Pfenniger, A., P3398  
 Pfeufer, A., P539  
 Pfister, O., P622  
 Pfisterer, M., P669, P2152, P3356, 5084, P5289  
 Pfisterer, M.E., P622, P673, 5093  
 Pflederer, T., P1358, P4564  
 Pfluger, H., P5639  
 Pfuetzner, A., P1444  
 Pham, T.S., P5427  
 Phan, T., P2494, P4880, P4885  
 Phan, T.T., P1459, P1561, P4471, P4883  
 Phatak, H., P2250, P5717  
 Phefferkorn, J.E., P3243  
 Phelan, D., P2537, 5047  
 Phelps, M., 398  
 Philip, J.L., P1373  
 Philip-Couderc, P., P556  
 Philipp, R., P3816  
 Philipp, R.K., P2994  
 Philipp, S., P4750  
 Philippi, A., 4969  
 Philippova, M., 1249, P2202, P3945, P4615  
 Phillips, D., 5115  
 Phillips, S.D., P2072  
 Phoenix, F., P2104, 5118  
 Phrommintikul, A., P4680  
 Phuong, V., P727  
 Pialoux, G., P4257  
 Pianelli, M., P4788  
 Piatkowski, R., P1328, P4843, P5337  
 Piazza, L., P510, P4814  
 Piazza, N., P3857, P4030, P4129, 4954  
 Piazza, R., 5230  
 Pibarot, P., 1251, P2399, P3792, P4092, P4104, 5237, P5333



- Pica, S., P3222  
Picano, E., P433, P513, P1528, P1703, P1711, P1712, 2048, P2178, P2442, 2867, P3885, P3889, P3890, P4788, P5249, P5347  
Picatoste, B., P3263  
Picazo-Angelin, B., P1641  
Picchi, A., P4759  
Picchio, E., P2495  
Piccoli, M., P585  
Piccoli, P., P772, P2416  
Piccolo, R., P4719  
Pichard, A., 2681, P4074, P5719  
Pichler, P., P2158  
Pickering, M., 390  
Piechowiak, M., P2410  
Pieculewicz, M., 2005, 2009, P4818, P5506  
Piegari, E., P3065  
Piek, J.J., P1303, P2187, P2938, P3098, P3101, 3569  
Pieniazek, P., P3914, P4480, P5504, P5506, P5510, P5537  
Pieper, P.G., P4767, P4782, P4789, P4913  
Piepoli, M., P580, P4835, P5695  
Piepoli, M.F., P4766  
Pierard, L.A., P517, P2399, 2864, P4093, 5157, 5162, P5326, P5333, P5335, P5336  
Piergentili, C., P795  
Pieroni, M., 2776, P3260  
Pierre-Justin, G.P.J., P517  
Pierri, A., P2191, P5517  
Pieske, B., P552, P562, 1126, 1242, P1693, P1701, P2428, P3347, P3825, P4531, P4897, P4905, P4911, P4914, 5131, P5324  
Piestrzeniewicz, K., P422, P2410  
Pietersma, A., P3047  
Pietri, P., 162, 3536, P3937, P4265, P4936  
Pietrucha, T., P3930  
Pignone, M., P1470  
Pijls, N.H.J., 3564, P4040, 5190  
Pijnappels, D., P3059  
Pijnappels, D.A., P572, P3099  
Pik, J.J., 1016, P3147  
Pikto-Pietkiewicz, W., P4917  
Pilati, M., P4806  
Pilbrow, A.P., P541  
Pilet, P., P4056  
Pilgrim, T., P5256  
Pilichou, K., P3238  
Pillekamp, F., P3066  
Pilliere, R., P2155  
Pillois, X., P3127  
Pilotto, A., 1212  
Pilu, A., P549  
Pilz, S., P528  
Pimentel, R., P5548  
Pinamonti, B., P3264, P4244  
Pinar, E., P4858  
Pinazo, M.J., P1559  
Pineda, V., 1007  
Pinerio, A., 892  
Pingitore, A., 1106, P3360, P3833, P4549  
Pingsuthiwong, S., P4655  
Pinho, J., 5236  
Pinho, P., P2317, P4895  
Pinilla, O.A., P4943  
Pinna, G.D., P2116, P4232, P5681  
Pinnacchio, G., P597  
Pinon, P., 2047  
Pinon Esteban, P., P641, P1499, P1500, P2980, P5285  
Pintalhao, M., P818, P3358  
Pinto, F.J., P512, P1495, P4469, P5363, P5364  
Pinto, I.M., P4567  
Pintya, A.O., P3278  
Pio-Magalhaes, J.A., P3403  
Pioggiarella, R., 987, P3131  
Piorowski, C., P764, P766, P4187, P4825, P4854, P4871  
Piot, C., P5586  
Piotrowicz, E., P593, P2511  
Piotrowicz, R., P593, P2511  
Piotrowska, M., P593, P2511  
Piotrowski, W., P637, P3128  
Piovaccari, G., P771, P4723  
Piper, H.M., P1394, P1404, P3394, P3951, P3952, P4475, P4489  
Piperno, A., P5714  
Piquard, F., P1676, P2328, P3392  
Piraino, D., P4675  
Piraino, R.A., P4732  
Piras, A., P2507  
Pirat, B., P514, P2237  
Pires, A.L., P3358  
Pirinen, E., P3388  
Piriou, N., P2347  
Pirola, A., P4540  
Pironti, G., P1408, P1686  
Pisanello, C., P597  
Pisani, A., P540  
Pisani, C.F., P763  
Pisati, M.S., 256, P4155  
Piscione, F., P2191, P4029, P4084, P4719, P5517  
Pishak, V.P., P2208, P5392  
Pislaru, C., P481  
Pisters, R., P623, P630, 3650, P3891, P5495  
Pistner, W., 346, P3277  
Pitkala, K.H., P2275  
Pitkanen, O., 3644  
Pitsavos, C., P468, P859, 1014, P1446, P1486, P1489, P2228, P2265, P3126, 3542, P3981, P4217, P4692, P4919, P5341, P5351, P5667, P5703  
Pitschner, H.F., P1624, P3325  
Pitt, B., 240, 1105, P4203  
Pitt, M., P687  
Pittaras, A., 131, 165, 2641  
Pittl, U., 288, P5289  
Pitto, L., 388  
Pitts, J., P3020  
Piveta, C., P4942  
Piwonska, A., P3161  
Piwonski, J., P3161  
Piwowska, W., P753, 983  
Pizarro, G., P1378, P3039  
Pizarro, R., 336  
Pizzi, C., P2092, P3156  
Pizzi, N., P5578  
Pizzocri, S., P3191, P4047, P4710  
Pizzuti, A., P2442  
Placido, R., P736  
Plaksej, R., P3982, P4920  
Plass, C., P724, P5282  
Platonov, P.G., P4838, P4848  
Platsouka, F., P1446, P2265  
Plauchou, H., P4892, P5546  
Plechev, V., P4175  
Plehn, G.P., P765  
Plenge, T.G., P3072  
Plesnila-Frank, C., 4978  
Plewka, M., P484, P3064, P3874, 5096  
Plichart, M., 133, P5424  
Plicht, B., P4750  
Plicner, D., P1320  
Plokker, H.W.M., P725, P737, 2008, P4804  
Plozer, E., P1418  
Plutzky, J., P5247  
Pochet, N., P3956  
Pocock, S.J., P645, 5210  
Pocovi, M., 883  
Podolec, J., 3642  
Podolec, P., 2005, 2009, 3642, P3881, P4818  
Podor, T., P4493  
Poeling, J., P5339  
Poelmann, R.E., P573  
Poelz, W., 158  
Poelzl, G., P2333, P2335, P4238, P4884  
Poerner, T.C., P2145, P3907, P4923, 4979, 4982  
Poeschko, S., P2137  
Poess, J., P5373  
Poetz, O., P4867  
Poggessi, C., 1238  
Poggianti, E., P1703  
Poggio, R., P2310  
Pogljajen, G., P5692  
Poh, K.K., P627, P3073, P4724, P5388  
Pohar Perme, M., P3118  
Poirier, C., P603  
Poitz, D.M., P4588  
Pokushalov, E., P779, P1615, P1623, P1626, P1627, P1632, P1636, P3091, P3097, P4872, 5215, P5601  
Polacek, P., P720  
Polanska, M., P1567, P3274  
Polat, E., P2430  
Poldermans, D., 156, 157, 887, 1009, P1445, P1706, P2170, P2243, P2341, P2509, P2966, P3047, P3159, P3978, P3987, P4633, 4947, 5061, P5252, P5485, P5513, P5524, P5525, P5526  
Poletti, R., P1680, 2767  
Polge, A.S., P1568  
Poli, D., P1592, P3331  
Polidori, G., P701, P714  
Polikina, O.A., P4010  
Polin, M.A.M., P1673  
Politano, L., P801  
Politi, A., P5268  
Politi, L., P3229  
Pollack, C., P5686  
Pollard, C.E., P575  
Pollono, P., P535  
Polo, L., P4790  
Polo-Tomas, M., P2095  
Poloczek, M., P2987, 4990  
Polonen, P., 3644  
Polonski, L., P451, P474, P659, P749, P870, P2963, P3143, P3230, P3849, P4209, 5240, P5273, P5278, P5279, P5287, P5288, P5293, P5307  
Polovina, M., P2433, P3322, P3985, P4194  
Polunina, A.G., P855  
Polyakov, V., P1296  
Polyakova, E., 246, P786  
Polyakova, I., P780  
Polychronopoulos, E., 3539  
Polydorou, A., P635, P878  
Pomaro, D.R., P4610  
Pompella, A., P5567  
Ponce-Balbuena, D., P579  
Poncelas, M., P1387  
Poncelet, A., 5165  
Poncelet, P., P1718, P2521  
Ponchietti, S., P701  
Pongas, D., P2134  
Ponikowska, B., P4209, P4893  
Ponikowski, P., 1101, P2486, P2489, 2763, P4209, P4893, 5059, P5658  
Ponitz, V., P830, P2277, P2969  
Ponnambath, S., P3855  
Ponnuthurai, F.A., 5070  
Pons, D., P3224  
Pons, F., P1721, P3167, P4219, P4231  
Pons, S., P2474, P4494  
Pontone, G., P1356, P1357  
Poole-Wilson, P.A., P2389, P2493, P4209  
Popa, A., P3054  
Popa, D., 2052  
Popa, R., P3984  
Popescu, B.A., P2183, P2184, 2862  
Popescu, I., P4170  
Popescu, M.I., P4653, P4673  
Popiel, M., P3196  
Popma, J., 2923  
Popov, V., P5581  
Popova, K., P5581  
Popovic, B., P508, P4083  
Popovic, B.P., P4110  
Popovic, S., P4199  
Popovich, I., P1409  
Popovich, M., P1409  
Popp, T.P., P4145  
Poppe, K.K., P2167  
Porapakkham, P., 1097  
Porapakkham, P.L., 1097  
Porat, A., P2086  
Porcher, R., 5079  
Porcu, E., 5039  
Porcu, L., P3217  
Porcu, M., P2495, P2518  
Poredos, P., P3118  
Porela, P., P682

- Pornratanarangsi, S., P3221  
 Porres, J.M., P1662  
 Porter, A., 5205  
 Porterfield, J., P839  
 Porterfield, L.M., P839  
 Porteri, E., P549, P559  
 Porthan, K., P571  
 Portig, I., P5672  
 Porto, I., P662, 1155, P1314  
 Portoles, M., P864, P3387, P4259  
 Portsi, A., P1443  
 Posa, A., P3791  
 Posada, E., P1559  
 Posch, M.G., P526, P3240, P3254  
 Positano, V., P827, P2080, P3028, P4543, P4550, P4879  
 Posnik-Urbanska, A., P3415  
 Possemiers, N., 4960, 4965  
 Possemiers, N.M., P2949  
 Post, H., 1126, P1693, P3347, P3825  
 Post, M.C., P725, P737, 2008, P2136, P4804, P4810  
 Post, S., P2136  
 Postma, S., P1311, P5291  
 Postrach, E., P1679  
 Postula, M., P1328  
 Potamitis, N., P5587  
 Potamitis, S., P3189, P3231  
 Potapov, E., 1004, 1005  
 Potenza, A., P3222  
 Potin, M., P4164  
 Potocki, M., P2406, P4201, P4213, 5078  
 Potpara, T., P2433, P3322, P3985, P4194  
 Pott, C., P565  
 Pott, L., P4197  
 Potzger, T., P1540  
 Pouchelon, J.L., P2474  
 Poulakou, G., P2241  
 Pouleur, A., P1416, P2542  
 Pouli, E., P4749  
 Poulin, M., P4746  
 Poulsen, H.E., P5442  
 Poulsen, H.E.P., P1440  
 Poulsen, S.H., P2130  
 Poulter, N.R., P5247  
 Poursafa, P., 3537  
 Povshenko, O., P3091  
 Povlsen, J.A., P4490  
 Povoja, P., P3888  
 Power, J., P1689  
 Poyatos, S., P1559  
 Poyet, R., 5119  
 Pozios, I., P861  
 Pozo, E., P3795, P4113  
 Pozo Osinalde, E., P4114, P4115, P4117, P4120  
 Pozzer, P.A., P3037  
 Pozzi Mucelli, R., P1354, P3034  
 Prabhakaran, D., P5449  
 Prabhu, A., P1329  
 Pracon, R., 2933  
 Pracucci, G., P5499  
 Prada, C., P479  
 Prada, O., P596  
 Pradella, S., P3023  
 Prakken, N.H., 2051  
 Prakken, N.H.J., P599, P4696, 4975, 4976  
 Prasad, S.B., 2053, P4881  
 Prasad, S.K., P1262, P3178, 4973, P5398  
 Prassopoulos, V.K., P2252  
 Prat, S., P3377  
 Prat-Gonzalez, S., P2113  
 Pratali, L., P1711, P2178  
 Pratesi, C., 155, P5536  
 Pratesi, G., 155, P5536  
 Prati, F., P1510, 4992  
 Pratola, C., 5130  
 Praveckova, A., P1729  
 Praz, F., P2164, P2349  
 Prech, M., P2396  
 Prefumo, F., P862  
 Pregowski, J., 2933, P3179  
 Prehar, S., P3384  
 Preiss, D., 1823  
 Preissner, K.T., P544, P1396, P4496  
 Prejbisz, A., P5542  
 Premaratne, G., P3370  
 Prencipe, G., P4674  
 Pres, D., P474, P5288, P5293, P5307, P5309  
 Presbitero, P., P3217  
 Prescott, M., 1099  
 Pressler, A., P4897  
 Prestigiacomo, C.J., 290  
 Preti, P., P4839  
 Pretorius, S., P5588  
 Pretre, R., P5555  
 Previtali, M., P515, P1266, P1565, 2050, P3860  
 Pribe, R., P3256  
 Price, J.F., P2102  
 Priegli, L., P2211  
 Pries, A., P2221  
 Prieto, D., 1002  
 Prieto Arevalo, R., P4229  
 Primetshofer, D., P3258  
 Prins, M.H., P623, P3891  
 Prinz, C., P1675, P3284, P3307, P4226, P4909, P5693  
 Prinzen, F.W., 1922, P5646  
 Prioli, M.A., P4806  
 Prior, D., P1591, 5091  
 Prior, D.L., 4974, P5639  
 Prior, P., P678  
 Priori, S., 1238  
 Prisco, D., P1592, P3331  
 Probst, M., 2674  
 Probst, S., P3244  
 Probst, V., P570, 5120, 5122, P5551  
 Procaccini, V., 1095  
 Prochazka, P., P522  
 Prochnau, D., P2449  
 Prock, A., P558, P5378  
 Proclemer, A., P1649, P1658  
 Prodromiti, M., P4218  
 Prohorova, D., P5601  
 Proietti, R., P1564, P3172  
 Proietto, J., 2647  
 Prokopczuk, P., P663  
 Pronicki, M., P1433, P5590  
 Prontera, C., P4932, P5368  
 Prost, P.L., P1718, P2521  
 Prot, M., 5003  
 Protonotarios, N., P1698, P3242, P4697, P5396  
 Proulx, G.R., 5073  
 Provan, S., P1481, P4617  
 Provan, S.A., P1732  
 Provenza, G., P1565  
 Providencia, L., P426, P428, P2974, P3827, P3832, P4225  
 Providencia, L.A., P439, P711, P734, 2677, P2973, P3000, P4537, P4904, 5185  
 Prunier, F., P4492  
 Pruss, R., P1384, P4491  
 Pruszczuk, P., P704, P707, P747  
 Pruszkowska-Skrzep, P., P3230  
 Pruvot, E., P4865  
 Pryjma, J., P2958  
 Prystowsky, E., P4852  
 Przewlocka-Kosmala, M., P817, P3982  
 Przewlocki, T., 2005, 2009, P2528, P3914, P3924, P4818, P5504, P5506, P5510, P5537  
 Przybylski, A., P1661, P3262, P4163  
 Przybylski, R., P2307, P2343, P3080  
 Psaltis, P.J., P3085, P3313  
 Psari, V., P524  
 Psaros, C., P4612, P4930, 5136, P5421  
 Psaros, T., P4930  
 Psarros, C., P1682  
 Psychari, S., P3208  
 Ptaszynska, A., 5041  
 Ptaszynski, W., 5183  
 Pu, J., P1407  
 Pucci, L., P1458, P3949  
 Pucci, N., P5472  
 Pucheu, Y., P2961  
 Pudil, R., P3200  
 Puente, D., P5661  
 Puererfellner, H., P4872  
 Puerner, K., P797  
 Puggioni, C., 236  
 Pugliese, F., 390  
 Puhakka, J., 3773  
 Puig, T., P4207  
 Pulikal, G., P687  
 Pulipati, B., P2182  
 Puljevic, D., P1308  
 Pulkki, K., 2764  
 Pulli, R., 155  
 Pun, S.H., P543  
 Pundziute, G., P1521, P3011, P4622, 4987  
 Punjabi, P.P., P739  
 Punnonen, K.R., 5075  
 Puntoni, M., P2264  
 Punzi, H.A., P2287  
 Puppini, G., P4806  
 Purdy, D.A., P686  
 Purushothaman, S., 2916  
 Purvis, J.A., P3804  
 Puszczewicz, D., P2307  
 Putter, H., P1506, P4082  
 Puurunen, M., P682, P2438  
 Puzovivo, A., P4215, P4247  
 Pyda, M., P3964  
 Pyrgakis, V., P3268, 5145, P5587  
 Pysz, P., P3918  
 Pytkowski, M., P609, P3262  
 Pyxaras, S., P3264, P4244  
 Q Melo, J., 5243  
 Qi, X.Y., 3660  
 Qian, J., P1534  
 Qin, Q., 152  
 Qin, Y.Q., P5718  
 Qiu, H., P4608  
 Qiuwaxi, J., P3153  
 Quaden, R., P4127  
 Quandalle, P.H., P2121  
 Quang, X., P4640  
 Quarta, C.C., 344, P3236, P3239  
 Quarti Trevano, F., P3406, P4022, P5246  
 Queiros E Melo, J., P2320  
 Quere, S., P4536  
 Quezada, M., P2401  
 Quick, H.H., P3026  
 Quilici, J., 5119, P5582  
 Quimbo, R., P2247, P2249, P5409  
 Quiniou, G., 1112  
 Quinlan, R., P3396  
 Quinn, P.A., P3855  
 Quinn, R., P2471, P2473  
 Quinn, T., P3843, 5203  
 Quintanilla, J.G., P566  
 Quon, M., P4263  
 Qureshi, A., 147  
 Qureshi, N., P3142  
 Raatikainen, P., P4153  
 Raaz, U., P2408  
 Rabben, S.I., P498  
 Rabchenko, D., P4843  
 Rabelink, T.J., P2242  
 Rabelo, R., P4794  
 Racadot, E., P2098  
 Rached, R., 5238  
 Raczak, G., P2116, P4171  
 Raczka, F., P5586  
 Radchenko, D., P4272  
 Radchenko, G., P4272  
 Rademacher, W., P2449  
 Rademaker, M.T., P1697  
 Rademakers, F., P483, P485, P1342, P1607  
 Radeva, R., P708  
 Radhakrishnan, S., P4811  
 Radke, P.W., P3840  
 Radosavljevic Radovanovic, M., P444  
 Radovanovic, D., P3824  
 Radovanovic, M., P2126  
 Radovanovic, N., P444, P2126  
 Radovanovic, S., P4176  
 Radovits, T., P545, P2324  
 Raducan, A., P1395  
 Radulescu, B., P1307, P1312, 5042, 5069, 5242  
 Radunovic, Z., P4694  
 Radvanyi-Hoffman, H., P3276

- Raev, D., 2780  
Raffa, S., P4174, P4182, P4827  
Raffai, -, P1725  
Raffel, C., P3013  
Raffel, O., P5310  
Raftopoulos, L., P781, P4149, P4907  
Ragab, D., P798  
Raggi, P., P4571, 5086  
Raghava Sarma, P.V., P5522  
Rago, A., P801  
Rahimi, K., 2782, 3544  
Rahimtoola, S., P5563  
Rahm, A.K., P2422  
Rahmi, R., P534, P2318  
Rahn, I., P4911  
Rai, B.K., P5394  
Rai Balha, Y., P4741  
Rainaldi, G., 388  
Rainer, P., 5131  
Raineri, C., P515  
Raisaro, A., P515  
Raithel, D., P4063  
Rajamani, S., P404, P3312  
Rajamannan, N., P5563, P5566  
Rajappan, K., P2989  
Rajic, D., P2126  
Rajwani, A., 242, P799  
Rajzer, M., P4255  
Rakhi Nair, S., P3927  
Rakhit, R., P2085  
Rakhit, R.D., P1327, P3829  
Rakowski, T., P683, P2958  
Rallidis, L., P1487, P2241, P5251, P5393  
Ramachandra, R., P4570  
Ramadanovic, A., P3279, 5233  
Ramakrishnan, L., P5449  
Ramakrishnan, S., P777, P2285, P2389  
Ramdat Misier, A.R., P758, P1635, P2441  
Ramires, J.A.F., P534, P538, P2069, P2071, P2256, P2318, P3158, 5189, 5191, 5238, P5480  
Ramirez, A., P4094  
Ramirez, M., 1912  
Ramirez, R.R., 5068  
Ramirez Rodriguez, R., P5622, P5623  
Ramirez-Huesca, M., P5584  
Ramkisoensing, A.A., P3099  
Rammer, M., P1722  
Ramondo, A., 1003, 5195  
Ramondo, A.B., P3173, P5579  
Ramos, P., P438  
Ramos, R., P421, P632, P2939, P2941, P3133, P5600  
Rampazzo, A., 1209, P3233  
Rampp, T., P4566  
Ramunddal, T., P648, P1741, 5050  
Ran Kornowski, R.K., P1550  
Rana, B., P2514  
Rana, O., P807  
Rana, O.A., 2870  
Rancati, V., P3222  
Ranchor, A.V., P4185  
Range, G., P2112, 4989  
Ranjith, N., P4020  
Rankin, A., P820  
Rannou, O., P544  
Ransbury, T., P1647  
Ranucci, M., P851  
Rao, S., P2084, P4819  
Rao, S.N., P4830  
Raoult, D., P3794, P4124  
Rapacciuolo, A., P4084, P4719  
Rapaeae, A., P3109, P4539  
Rapezzi, C., 344, P2079, P3236, P3239  
Raphael, C.E., P2465  
Raposo, L., P1456, P3227, P5281, P5463  
Rappelli, A., P4620, 5134  
Rapti, A., P3044  
Raptis, S.A., P3106  
Rashad, M.A., P4222  
Rashed, E., P3906  
Rashwan, M., P5255  
Rask-Madsen, C.R.M., P3962  
Rasmussen, H.K., P1681  
Rasmussen, A., P3155  
Rasmussen, J.N., 1821, P2114, P2117, P2942  
Rasmussen, K., P1274  
Rasmussen, L.E., P4490  
Rasmussen, L.H., P4851  
Rasmussen, R.V., P4122  
Rasmussen, S., 1826, P2114, P2117, P2942, P3170  
Rassi, I., P4863  
Ratajczak, M.Z., P3068  
Rath, G., P3959  
Rathod, K.S., P628, P3142, P4112  
Rattazzi, M., P5561  
Rauch, M., P1406, P3371  
Rauch, R., P4780  
Rauch, U., P2221  
Rauchhaus, M., P5655  
Rauhe, W., P1649  
Raunso, J.R., P3962  
Rauwolf, T., 5187  
Ravagnani, P., P1305, 5071, P5511  
Ravani, M., P4628  
Ravasco, P., P4026  
Ravens, U., 3651, P4841  
Ravera, L., P1330  
Ravichandran, S., P1444  
Raviele, A., 3652  
Ravkilde, J., P650, P4720  
Rawlins, J., P2508, P2520, P3124, P4239  
Rawlins, J.C., P600  
Ray, K.K., 1823  
Ray, M., P3316  
Ray, R., P3086  
Ray, S., P4106  
Ray, S.G., P2400, 2865  
Rayan, M., P4581  
Raymond, L., 5007  
Razakjr, A., 2645  
Razavi, R., P4796  
Razek, V., P3050  
Razzouk, L., P3225  
Re, F., 5234  
Read, P.A., P4506  
Reant, P., P2141, P4787  
Rebecchi, M., P4146, P4151, P4826, 5222  
Rebocho, M.J., 5243  
Reboldi, G., P4688  
Rebuzzi, A.G., P1271  
Recchia, F., P1712, P4508  
Recchia, F.A., P2264  
Rechcinski, T., P3064  
Recio, A., 5161  
Recla, S., P4788  
Reda, A., P2235  
Reddecliffe, S., P1596  
Reddy, H.K., P5338  
Reddy, K.S., P5449  
Reddy, S.K., P2389  
Redel, T., P1540  
Redfern, J., P592  
Redheuil, A., P2081, P3030  
Redington, A., P5553  
Redington, A.N., P1393  
Redon, J., 1017  
Redpath, A., 4980  
Redruello, M., P850  
Redwan, B., P715, P724, P2101, P5282  
Redwood, S., P680  
Reents, T., P4845  
Rees, W., P5339  
Reffellmann, T., 2674, P4663  
Reffo, E., P2383  
Refice, S., P407  
Refsum, H., P1274  
Regar, E., 897, P1508, P1509, 2930, P4046, P4073, P4075, P4076, P4077  
Reggianini, L., P1713, P5657  
Regitz-Zagrosek, V., P5670  
Regoli, F., P4228, 5067  
Rehberger, P., P4178  
Rehnqvist, N., P4173  
Reiber, J.H.C., 1118, P3018, P4622  
Reibis, R., P4261, P5408, P5724  
Reichart, B., P4566  
Reichart, B.R., 2928  
Reichek, N., P4095  
Reichensperner, H., P4132, 5158  
Reichlin, T., P4201, P4213, P4240, P4243, P4878, 4985, 5078  
Reid, C., 979, 986, 2647, P5481  
Reid, C.M., 4951  
Reid, I.R., P1479  
Reifart, N., P4706  
Reil, J.-C., P568  
Reil, J.C., 244  
Reilly, C.M., 123  
Reilly, S.N., P4868  
Reimold, M., P2452  
Rein, P., P1464, P2262, P2270, P2279, P2975, P4666  
Reinecke, H., P666, P5327  
Reiner, Z., 1795, P3114  
Reinhard, W., 1108  
Reinicke, M., P1298  
Reinig, K., 5218  
Reinohl, J., P4142  
Reinsch, N., P1585  
Reis, A., P4475  
Reis, M.M., P1671  
Reis Santos, K., P2463  
Reisinger, J., P3258  
Reisma, C., P4782  
Reisman, S., P1687  
Reiter, M., P4213  
Reiters, P., 2762  
Reitsma, J.B., P4221  
Rekawek, J., P4772  
Rekkik, S., P4121  
Relvas, W.G., P4610  
Remme, C.A., P3238, 3777  
Remme, E.W., P2175, P5631  
Remme, W., 1799, 4995  
Remme, W.J., P2477  
Rommelink, M., 3569  
Remoli, R., P5611  
Remppis, A., P636, P3256  
Remppis, B., 2768  
Ren, L., P1643  
Renard, M., P2936, 5153  
Renard, S., P4107  
Renaud, B., P3369  
Renda, G., P1478, P2231, P4937  
Renedo, F., P5578  
Renger, A., P3075, P3078  
Rengo, A., P819  
Rengo, F., P590  
Rengo, G., P819  
Renner, C., P1524, P4609  
Renner, M.-K., P715  
Rennes, P., P4555  
Rensing, B.J., P2136  
Rentoukas, I., P3330, 5145, P5297  
Rentoumi, V., P4697  
Renz, A., P1358  
Repaci, S., P5292  
Repasos, E., P861  
Repetto, A., P1266, 2050, P3222, P3860  
Repossini, A., P772, P2416  
Reppas, E., P5637  
Reppel, M., P815, 1113, P3066, P4869, P5621, P5690  
Reshamwalla, S., P813  
Resink, T., P3945  
Resink, T.J., 1249, P2202, P4615  
Respress, J., P3380  
Resseguier, N., P4107  
Restaino, G., P2080  
Restrepo, J., 5080  
Reuter, D., P4137  
Reuter, H., P561, P1447  
Revera, M., P1435, P3807, P5694  
Revilla, A., P3795, P4113  
Rexius, H., 5235  
Rey, C., P2372  
Rey-Blas, J.R., 289  
Reyes, M., P3133  
Reyes, P., 391  
Reyna, Y., P2131  
Reynolds, C., P3380

- Reynolds, R.M., P2102  
 Rezai, R., P616  
 Rezende, T.M., P3806  
 Reznik, E.V., P836  
 Rha, S.W., P2992  
 Rhabek, S., P2437  
 Rheume, E., P2499  
 Rhim, C.Y., P5266  
 Rho, R.T.H., 5106  
 Rhombert, S., P1464, P2262  
 Riaz, M., P3952  
 Ribas, C.S., P4847  
 Ribas, S.C., 1914, P2447  
 Ribeiro, A.L.P., P847, P1695, P4906  
 Ribeiro, E.E., 5191  
 Ribeiro, H., P774, 1825, P5496  
 Ribeiro, H.B., P2071  
 Ribeiro, M.L., P1709, P4898  
 Ribeiro, S., P736, P746, 1149, 2679, P2960,  
 P3002, P3193, 4977  
 Ribeiro, W.N., P4172  
 Ribera, A., 343, 1007, 1010, P4036  
 Riberi, A., P4124  
 Ribichini, F., P4098  
 Ricalde, A., 391  
 Ricard, P., P769  
 Ricci, A., P4116  
 Ricci, R.R., P5677  
 Riccio, C., P580, P4835  
 Riccioni, G., P4674  
 Ricco, A., P5611  
 Rice, G., P1687  
 Rice, N., 245  
 Ricevuto, E., 1095  
 Rich, M.W., 5045  
 Richard, A., P2372  
 Richard, P., 4989  
 Richard, S., P3312  
 Richards, A.M., P541, P1697  
 Richards, M., P5673  
 Richardson, M., P1568  
 Richardt, G., P643, P646, P666, 5202  
 Richart, T., 163, P542  
 Richet, H., P4124  
 Richey, M., P1647  
 Richiardi, L., 885, P3168  
 Richmond, L., P2450, 5216  
 Richter, A., 2918, P3254, P3279, P3286, 4955,  
 5233, P5549  
 Richter, A.J., 2821  
 Richter, B., P1619  
 Richter, E.K., P4593  
 Richter, S., 1110  
 Rickenbacher, P., P673, P3356  
 Rickli, H., P3824  
 Rico, M.N.D., P1365  
 Ricordeau, P., P1496  
 Ricottini, E., P3175, P4534, P4703  
 Riddell, T., P3145  
 Ridker, P., P3122  
 Ridocci Soriano, F., P4540, 5080  
 Rieber, J., P1540, P2332, 4978  
 Rieck, A.E., P865  
 Riedel, M., P2961  
 Rieger, G., P4872  
 Riemersma, R., P1426  
 Rienstra, M., P2432  
 Riess, F.C., P2412  
 Rietzschel, E., 153, 888, P3913  
 Rifourcat, I., P535  
 Riga, M., P452, P1522, P4064, P4627  
 Rigatelli, G., P795  
 Rigato, I., 1209, P1267  
 Rigby, A., P811  
 Rigo, F., P1528, 2867, P3885, P3889, P3890,  
 P4526, 5130, P5645  
 Rigolin, V.H., P2394  
 Rigolli, M., P1688  
 Rigopoulos, A., P3280  
 Rigotti, P., P4761  
 Riise, G., 5168  
 Riley, J., 5009  
 Rimoldi, O., P4744  
 Rimoldi, O.E., 390, 5132  
 Rimoldi, S.F., 389, P738, 976, P4757  
 Rinaldi, J.P., P769  
 Rinehart, S., P3014  
 Rinfret, S., 1251, P3187  
 Ringborg, A., P1498  
 Ringwald, G., P4706  
 Rios Diaz, C., P5622, P5623  
 Rioufol, G., P4892  
 Ripa, R.S., 2816  
 Ripoll Vera, T., P788  
 Risch, L., P4666  
 Rischar, C., P3102  
 Rissanen, T.T., P2192  
 Ristori, C., P2201, P5512  
 Ritchie, K., 133, P624  
 Ritsatos, C., P2962, P3163, P4031  
 Ritscher, G., P2451, P4552, P5647  
 Ritter, F., P5339  
 Ritter, O., P768, P3026, P3365, P3366  
 Rittger, H., P1541, P5647  
 Riva, L., 344, P3236, P3239  
 Rivadossi, F., P5471  
 Rivera, J., P1318  
 Rivera Otero, M., P864, P3387, P4259  
 Rivero, F., 2926  
 Rivero Cerda, D., P4792, P4793  
 Rivron-Guillot, K., P698  
 Rixe, J., 1257, P1364, P1406, P3019  
 Rizk, H.H., P4119  
 Rizos, D., P5446  
 Rizza, A., P5505  
 Rizza, E., P1597  
 Rizzello, V., P1719  
 Rizzo, E., P2081  
 Rizzo, F., P3042  
 Rizzo, S., P3238  
 Rizzoni, D., P549, P559, P4939  
 Robalo Martins, M.S., P2544  
 Robati, R., P812, 5054  
 Robberecht, C., P4695  
 Robert, J., P4777  
 Roberts, C., P2502  
 Roberts, P.R., P3327, P3368  
 Roberts-Thomson, K., 5097  
 Roberts-Thomson, R., P1329  
 Robinson, J.M., 123  
 Robinson, K., P4603  
 Robinson, P.J., P1734  
 Robinson, P.N., P5543  
 Robitaille, M., P805  
 Robles, N.R., P3848  
 Roca Luque, I., P4111  
 Rocchiccioli, J.P., P820  
 Rocco, M., 5138  
 Rocco, F., P4109, P4123  
 Rocco, S., 2015  
 Rocha, J., P3024  
 Rocha, M.O.C., P847, P4906  
 Rocha, S., 1149, P2454, P2463, 2679, P2960,  
 P3002, 4977  
 Rocha, T.M.R., P2297  
 Rocha Costa, S., P2453, P3193  
 Rocha-Goncalves, F., P4895  
 Rochette, L., P618, P3859  
 Rochitte, C.E., P2271  
 Rodes Cabau, J., P2379  
 Rodes-Cabau, J., 1251, P4092, P4742  
 Rodes-Cabau, J.R., P3187  
 Rodio, L., P4215, P4247  
 Rodondi, N., P2291, P2300  
 Rodrigo, G., P4638  
 Rodrigo, J.L., P491, P492, P2304, P2397, P2401,  
 P3039, P4183, P5329  
 Rodrigues, B., 1107, 4961  
 Rodrigues, L.L., P1673  
 Rodrigues, R., P2320, P3193, 5243  
 Rodrigues, R.C., P2530  
 Rodriguez, A., P1501, P3133  
 Rodriguez, A.E., P4555  
 Rodriguez, C., 377  
 Rodriguez, C.J., P4540  
 Rodriguez, E., P4114, P4115, P4117, P4120  
 Rodriguez, J., 1010  
 Rodriguez, L., P4137, P5349  
 Rodriguez, M., P4164  
 Rodriguez, W., P2310  
 Rodriguez Fernandez, A., P4792, P4793  
 Rodriguez Garcia, M.A., P1378  
 Rodriguez Losada, N., P457  
 Rodriguez Palomares, J.F., P4089  
 Rodriguez Palomares, J.R.P., 1008  
 Rodriguez Vilela, A., P1499, P3186  
 Rodriguez-Alvarez, M.X., P441  
 Rodriguez-Barrios, J.M., P755  
 Rodriguez-Collado, J., P744  
 Rodriguez-Fernandez, J.A., P840  
 Rodriguez-Garcia, M.I., P3253  
 Rodriguez-Granillo, G.A., P4555  
 Rodriguez-Granillo, M., P1501  
 Rodriguez-Padial, L., P4938  
 Rodriguez-Palomares, J., 1007, P5355  
 Rodriguez-Penas, D., P1399  
 Rodriguez-Salvanes, F., P5454  
 Rodriguez-Sinovas, A., P4485  
 Rodriguez-Vilela, A., P2980  
 Roeder, T., 5231  
 Roeder, S., P2158  
 Roefe, D., P1691  
 Roehnisch, J.-U., P1497  
 Roehrich, M.-E., P3067, P3070  
 Roelant, E., P4004, P5431  
 Roes, S.D., 2819, P4546  
 Roesner, A., P3884  
 Roessel, M., P4607  
 Roessl, U., P4531, 5131  
 Roether, J., P5436  
 Roffi, M., P3895, P5500  
 Rogacev, K.S., P4631  
 Rogers, R., P816  
 Rogers, T., P4872  
 Roggia, C., 4971  
 Rognm, O., P509  
 Rognm, O.R., 4970  
 Rohner, A., P740  
 Rohrer, L., 378  
 Roig, E., P5691  
 Roik, M., P1328, P5315, P5337  
 Roiron, C., P3870  
 Rokitte, S., P3907  
 Rokkas, K., 162, P453, P466, P473, P638, P2209,  
 P2532, 3536, P3915, P3922, P3973, P4686,  
 P5346, P5533, P5721  
 Rokne, B., 128  
 Rokyta, R., P1368  
 Rolandi, F., P535  
 Roldan, V., P657, P1318, P3266, P4858  
 Roldan-Schilling, V., 1953  
 Rolf, A., 1257, P1364, P1406, P3019  
 Rolim, N., P3395  
 Rollan, P., P4773  
 Rollini, F., P728, P3229  
 Romaguera, R., 5080  
 Roman, A., P504, P731, P1572, P5603  
 Roman, C., 977  
 Roman Garcia, J., P5473  
 Romanazzi, S., P3838  
 Romanelli, M.N., P409  
 Romanens, M., P4659  
 Romangoli, E., 5197  
 Romano, M., P853, P1551, P2094, P4532  
 Romano, P., P5702  
 Romano, S., 1095  
 Romano, V., P2972, P3061, P3065, P3076  
 Romanov, A., P779, P1615, P1623, P1626, P1627,  
 P1632, P1636, P3091, P3097, 5215, P5601  
 Romanowska, M., P3128  
 Romboli, E., P3838  
 Romei, M., P5680  
 Romeih, S., P700  
 Romeih, S.A.H., P1381  
 Romeo, E., P4771, P4781, P4785, 5178, 5181  
 Romeo, F., P4087  
 Romeo, M.A., P827  
 Romero, C., 977, P1724  
 Romero, M., 2000, P2369, P4801, 5192, 5199  
 Romero, T., 977, P1724  
 Romeyer-Bouchard, C., P5620  
 Romieh, S., P4141

- Rominger, M., P4889  
Romo Penas, E., 1951, P2305, P2306  
Ronaldson, K.J., P5585  
Roncaglioni, M.C., 987, P3131  
Ronco, D., P5669  
Roncon, L., P735, P795, 5188  
Roncon-Albuquerque Jr, R., P741, P1593  
Rondan, J., P4731  
Rondano, E., P1542  
Rondinini, L., P5651  
Rondon, M.U.B., P1436  
Rondon, M.U.P.B., P4025, P4699  
Rontoyannis, G., P4697  
Roofthoof, M.T.R., P1603  
Roos-Hesselink, J.W., 2003, P4789, 5171, P5544  
Ropers, D., P1358, P4564  
Roqueta, C., P4094  
Roquete, J., P3038  
Rordorf, R., 5104, P5641  
Rosa, C.M., P1673  
Rosa, I., 3661, 5056  
Rosa, K.D., 1150, P2999  
Rosa, K.T., 4961  
Rosa, M.L.G., P1709, P4898  
Rosales, M.A., P4555  
Rosano, G., P1678, P5479  
Rosano, M.C.G., 4962  
Rosca, M., 2862  
Rose, E., P858  
Rosello-Lletí, E., P864, P3387, P4259  
Rosen, S.D., 5009  
Rosenberg, J., P5673  
Rosenberg, M., P1586  
Rosendaal, F.R., P1653, 1911  
Rosenhek, R., 345, P3792, P4101, 5164, P5563  
Rosenkranz, S., 902, P1588, P1594, P4595  
Rosenman, M., 3654  
Rosenmann, D., P3841  
Rosenschein, U., P3166  
Rosenthal, E., P4796  
Rosenzweig, A., 5132  
Roser, M., 1153, 5212  
Roshdy, A., P2387, P4558  
Rosi, A., 256, P3814, P4155  
Rosjo, H., P824  
Roslawiecka, A., P2528, P3914, P3924  
Ross, H., P603, P2523  
Rossebo, A.B., 5163, P5570  
Rossetti, C., 5071  
Rossetti, L., P4806  
Rossi, A., P835, P853, 1252, P1688, P2168, P4098  
Rossi, C., P654  
Rossi, E., P2953  
Rossi, G., P2080, P4543, P4879  
Rossi, J.S., P686  
Rossi, M., P1265  
Rossi, M.G., P1660  
Rossi, M.L., P3217  
Rossi, P., 151, P806  
Rossi, R., P728, P3229, P3994, P4003, P4571  
Rossi, S., P2354  
Rossiello, R., P3946  
Rossignol, G., P4742  
Rossignol, M., P5722  
Rossini, R., P1551, P2094, P4532  
Rosskopf, D., 2675  
Rosso, R., 1117  
Rost, C., P3868  
Roszkowska, M., P3925  
Roten, L., P3797  
Rotevatn, S., P3811  
Roth, A., P2968, 5205  
Roth, E., P5509  
Roth, I., 5139  
Roth, N., P5256  
Roth, S., P1720  
Rothe, M., P406  
Rothen, J.-P., P4659  
Rother, J., P2293  
Rotherman, M.T., P628, P3142, P4086, P4088  
Rott, M., P1655  
Rottlaender, D., 2016  
Roubille, F., P5586  
Roudaut, R., P2141  
Roughton, M., P2493, P4551  
Rougier, P., P2153  
Roul, G., 2775, P3353  
Rouleau, J.L., P4202, 5007  
Round, A.D., P4167  
Roura, G., P4731  
Roussa, V., P2103  
Roussakis, G., P1292, P2532, P5341, P5345, P5346, P5351  
Roussel, J., P1397, P2510  
Roussos, D., P781, P869  
Rouvellat, C., P3835  
Rouzet, F., P1469  
Rovithis, D., P2513  
Rowcenzio, D., 5057  
Roy, A., P2285, P2389, P5449  
Roy, D., P805  
Roy, L., 1251, 5073  
Rozyntry, P., P749, P4209  
Rozie, S., P4625  
Rozier, A., 233  
Rozzoni, A., P4022  
Rubartelli, P., P4085, 5195  
Rubay, J., 5165  
Rubboli, A., P699, P735, P2438, 5188  
Rubens, M., P2514, P4765, P4768  
Rubilar, A., P1501  
Rubino, P., P1265  
Rubinsky, B., P1513  
Rubis, P., 3642  
Ruble, D., 4978  
Ruchat, P., P4865  
Rucinski, P., P2360, P2361, P4171  
Ruck, R., P1733  
Rudling, M., P4590  
Rueb, N., P1633  
Ruethlein, A., P4524  
Ruetten, H., P4282  
Ruge, H., P4126  
Ruggeri, A., P1660  
Ruggiero, N.J., P4733  
Ruidavets, J.-B., 3540  
Ruidavets, J.B., 884, P1463, P2128, P4657, P5443  
Ruifrok, W.T., P854, P1413  
Ruisanchez, C., P512  
Ruiz, C.E., P2348, P5258  
Ruiz, M., P1652  
Ruiz, M.J., P744  
Ruiz, R., P1662  
Ruiz Garcia, J., 5011  
Ruiz Olgado, M., P1654, P2472, P3297  
Ruiz Ortiz, M., 1951, P2305, P2306, P5320  
Ruiz-Cabello, J., P5584  
Ruiz-Cano, M.J., P716, P718, P723, P4557  
Ruiz-Espejo, F., P3266  
Ruiz-Meana, M., P4485  
Ruiz-Nodar, J.M., P657, P1318, P4858  
Rull, G., P2545  
Rumana, N., P5683  
Ruminski, W., P1280, P4525  
Rumiz, E., P430, 3567, 5112  
Rundqvist, B., P501, P2325, 5166, 5168  
Ruperto, C., P685  
Rupp, H., P4889  
Rupp, S., P3234  
Ruppert, V., 2918, P3254, P3286, 5233  
Rus, M., P4653  
Ruscacio, M., P4743  
Ruschitzka, F., P5604  
Ruschitzka, F.T., 2913  
Rusconi, C.P., P686  
Rusicka-Piekarz, T., P4717  
Ruskoaho, H., P1417, P1430, P3376, 3773  
Russel, I.K., P3389, P5632  
Russell, K., P2175, P5631  
Russo, F., P3222  
Russo, M., P856, P858  
Russo, M.A., P1265, P3271  
Russo, M.G., P2370, P4771, P4781, 5178, 5181  
Russo, M.S., 5098  
Russo, S., P2972  
Russo, V., P801  
Russolillo, V., P3061  
Rustige, J., P3821, 5201  
Rusudan, A., P3258  
Rutherford, J., P4202  
Rutz, T., P2164  
Ruygrok, P., P1479  
Ruzyllo, W., P637, P1567, 2043, P3128, P3274, P3849, P4139, P5273, P5287  
Ryabikov, A., P3940  
Ryamnina, I.N., P5462  
Ryan, K., P676  
Rybar, R., P1474, P2255  
Rychli, K., P5376  
Rychlik, W., P3089  
Rydell Karlsson, M., P589  
Ryden, L., P3003  
Rydlewska, A., 5059  
Rygiel, K., 983  
Ryhanen, M., P2203  
Ryliskyte, L., P3999  
Rynkiewicz, A., P4515  
Ryo, K., P5605  
Rysa, J., P1417, P1430, P3376, 3773  
Rysz, J., P2505  
Ryu, J.K., P5410  
Rzepka, D., 1113  
Rzeszutko, L., P683, 4955  
Rzezak, J., 1125  
Rzeznik, D., P2528, P3914, P3924  
Saad, M., 5202  
Saad, R., P5635  
Saade, G., P3119  
Saarela, O., 984  
Saarell, E.V., P776  
Sabate, M., P1316, 4958  
Sabatine, M., P3008  
Sabatini, M., P4607  
Sabbadini, G., 1213, P3264, P3272  
Saber, M., P2154  
Sabhaney, V., P2137  
Sabin, G.V., P1337  
Saboor Beegum, M., P3927  
Sabovic, M., P3118  
Sabry, A., P5557  
Sacca, L., P2496  
Sacchi, S., P2431  
Sacco, F.M., P784  
Sacher, F., P1629, 3657, P4158, 5097, 5120, 5122  
Sacherer, M., P562  
Sachs, A., P4210  
Sachweh, J., 5064  
Sack, F.-U., P2524  
Sack, S., 5157  
Sacra, C.S., 1011  
Sade, E., P2430  
Sade, L.E., P514, P2237, P5648  
Sadeghian, H., P490  
Sadeghian, S., P490  
Sadeghpour, A., P2417  
Sader, R., P2121  
Sadigh, B., P1637  
Sadoul, N., P1648  
Sadoul, N.S., P4110  
Sadowski, J., P753, P1320, P2313, P5559  
Sadowski, M., P3179  
Sadushi, R., P713, P1613, 5177  
Saeki, F., P4070  
Saely, C.H., P1464, P2262, P2270, P2279, P2975, P4666  
Saenz De La Calzada, C., P716, P718, P723, P4557  
Safak, E., P761, 5218  
Saffitz, J.E., P5396  
Sagara, M., P830, P2277  
Sagara, Y., P3932  
Sager, H., P2197  
Saggau, W., P1646, P1665  
Sagic, D., P4735  
Sagie, A., P2391, P2407  
Saglam, M., P1584  
Sahara, M., P5248  
Sahara, S., P488  
Sahin, T., P4193, P4264, P5598  
Sahuquillo Martinez, A., P4792, P4793  
Said, K., P4119

- Said-Criado, I., P4235  
 Saihara, K., P633  
 Saikali, K., P2519  
 Saikali, K.G., P2512  
 Saini, D., P2095  
 Saito, H., P3041  
 Saito, K., P1537, 4986  
 Saito, R., P4629  
 Saito, S., P689, P4060  
 Saitoh, A., P1359  
 Saitoh, S., P5372  
 Saitoh, T., P3220  
 Saitou, N., P4038  
 Sajadieh, A., P1289, P3155, P4846, P5423  
 Saji, H., 394  
 Sajjadieh Khajouei, A., P2319  
 Sakabe, K., P4005  
 Sakai, K., P4568  
 Sakai, S., P1331, P1582  
 Sakai, T., P3197  
 Sakai, Y., P1548  
 Sakakibara, M., 1127  
 Sakali, H., P3208  
 Sakamoto, N., P5372  
 Sakamoto, T., P5372  
 Sakata, K., P5437  
 Sakaue, T., P4021  
 Sakellariou, G., P638, P1529, P3915  
 Sakkinen, H., P1430  
 Sako, H., P1379  
 Sakoda, T., P1421  
 Sakowicz, A., P3930  
 Saku, K., P1379  
 Sakuma, H., P1348, P3275, P4547, P4559, P4876  
 Sakuma, I., P402  
 Sala, C., P632, P2298  
 Sala, J., P632, P2298, P3854  
 Sala, P., P5702  
 Sala, S., P784  
 Saladini, F., 160  
 Salame, E., P4857  
 Salandin, V., P2409  
 Salas, A., 1010  
 Salchenko, V., P4511  
 Saldamarco, L., P2496  
 Saleh, N., P640  
 Salehzadeh, F., P3961  
 Salem, A., P5635  
 Salemi, V.M.C., P2484  
 Salerno, A., P2504  
 Salerno, M.C., P2240  
 Salerno, M.P., P2953  
 Sales, M.L., P4942  
 Salgado, A., P3193  
 Salgado, R., P4004, P5431  
 Salgado, R.A., 1256  
 Salgado, W., P2271  
 Salgado Fernandez, J., P1499, P1500, P3186  
 Salgado Somoza, A., P1400  
 Salgado-Fernandez, J., P840, P2980, P5285  
 Salice, P., P4775  
 Salinas Sanguino, P., 289  
 Saliqes, S., P618  
 Salling, S., P3136  
 Salloum, F., 1154  
 Salloum, F.N., P812, P2124, P3367, 5054  
 Salma, B., P658, P1552  
 Salomaa, V., P571, 984  
 Salourou, M., P4149  
 Saloustrous, E., P4749  
 Saloustrous, I., P829  
 Salpea, K., P2268, P3928  
 Salto, M.L., P3842  
 Saltzman, H., P4733  
 Salustri, A., P585, P2174  
 Salvadeo, S., P1737  
 Salvador, A., P3387  
 Salvador, L., P2409  
 Salvatore, F., P3248  
 Salvatori, C., P4543  
 Salvetti, A., P3414  
 Salvetti, M., P862, P4910, P4927, P4939  
 Salvi, A., 5186  
 Salvi, F., P3236, P4620  
 Salzmann, K., P4605  
 Samad, B.A., P3350  
 Samama, M.M., 1954, P2105  
 Samani, K., P784  
 Samani, N., 983  
 Samani, N.J., P542, P1405, 2765  
 Samardzic, J., P1308, P2340  
 Sambola, A., P4111  
 Samentzas, A., P3922  
 Samet, H., P3353  
 Samimi-Fard, S., P4912  
 Sampaio, F., P3024, P4915  
 Sampaio, R.O., P4091  
 Sampietro, T., P537, P2264, P3237  
 Samuel, B., P5620  
 San Roman, J.A., P3051, P3185, P3795, P4113, P4114, P4115, P4117, P4120  
 Sanchez, J., P770, P1620, P2448  
 Sanchez, J.A., P4485  
 Sanchez, P.L., P3842, P3848, P4229  
 Sanchez, T., P4563  
 Sanchez Chaparro, M.A., P5473  
 Sanchez Nistal, A., P4557  
 Sanchez-Chapula, J.A., P579  
 Sanchez-Elvira, G., P1518  
 Sanchez-Gallego, C., P4235  
 Sanchez-Giron, C., P5260, P5261, P5262  
 Sanchez-Gomez, N., P4235  
 Sanchez-Madrid, F., P5353, P5584  
 Sanchez-Mas, J., P2525  
 Sanchez-Paya, J., P657  
 Sanchez-Quintana, D., P1641  
 Sanchez-Recalde, A., P4786  
 Sanchis, J., P430, P1275, 2926, 3567, P4725, 5112  
 Sandberg, S.M., P1425  
 Sande, J.M., P5603  
 Sandek, A., 5058  
 Sandercock, G., P3048  
 Sanderman, R., P3154  
 Sanders, P., P1329, 1920, P2426, P2443, P3313, P3341, P5560  
 Sanders, P.W., 5045  
 Sanders, W.E., P1647  
 Sanderson, J.E., 166, P1714, P3346, P4891, P4901, P5643  
 Sandesc, D., P1395  
 Sandgaard, N.C.F., P3040  
 Sandin, M., P3051, P3185  
 Sandoval, D., 977, P1724  
 Sandoval, D.H., P3037  
 Sandri, M., P2944, P2951, 3528, 4959, 4966  
 Sandrock, S., P5621, P5690  
 Sandstede, J., P5489  
 Sandvik, L., P4679  
 Sanfilippo, A., P1510, P4033  
 Sanfins, V., P2453  
 Sangalli, L., P5317  
 Sangaralingham, S.J., P1425, 3774  
 Sangiorgi, D., P5268  
 Sangiorgi, G., P2346, P4050, P4723  
 Sangiorgi, G.M., P3229, 5197  
 Sangiorni, G., P1549  
 Sangle, S., P5420  
 Sanidas, E., P2364, P3898, P3921, P3975, P5417  
 Sankaranarayanan, R., P2434  
 Sanke, T., P4467  
 Sankin, C., P621  
 Sanli, C., P2382  
 Sans, S., P1450  
 Santangeli, P., 2776, P3260  
 Santarelli, A., P450  
 Santarelli, F., P1478, P2231, P4937  
 Santarelli, M.F., P3028  
 Santarpi, G., P4771, P4781  
 Santas, E., P1275, P4725  
 Santeusano, F., P4688  
 Santi, E., P5627  
 Santiago-Ruiz, J.L., P4235  
 Santinelli, V., P784, P2431, P2455  
 Santini, A., P665  
 Santini, F., P1263, P1429, P1454, P4650  
 Santini, M., P1649, P1658, 1899, P5627  
 Santonastaso, M., 160  
 Santoro, G., P2370, 5178, 5181  
 Santoro, T., P1737, P4839  
 Santos, A.O., P3939  
 Santos, I., P744  
 Santos, I.L.G., P4698  
 Santos, J.F., P3861, P3864  
 Santos, J.M., P3888, P5578  
 Santos, K., P1640, P1642, P2454, P3321  
 Santos, N., 2651, P4018  
 Santos, R.D., P2256, P2271  
 Santos, T., P2297  
 Santos, W., P2129  
 Santos Filho, R.D., P4748  
 Santos-Gallego, C.G., 892  
 Santulli, G., 1019, P2191, 2917  
 Sanz, G., P1559  
 Sanz, J., P1378, P2113, P3377  
 Sanzo, A., P5641  
 Saotome, M., P530, P3220  
 Saoudi, N., P743, P769  
 Saporetti, A., P3830  
 Saporito, D., P5618  
 Saracini, C., P1325  
 Sarafoff, N., 894  
 Sarai, M., P3010  
 Saraiva, F., P426, P428, P2973, P2974, P3827, P3832, P4225, P4537, P4904  
 Saraiva, M.F., P439  
 Saraste, A., P4591  
 Saratani, K., 5110  
 Sarbu, A., P2132  
 Sardella, G., P470  
 Sareban, M., P432, P1340, 2822, 5148  
 Sarg, B., P4605  
 Sargento, L.M., P3270  
 Saric, J., P4176  
 Saric, T., P3072  
 Sarkis, A., P3119, P4857, P4863  
 Sarkozy, A., 1110  
 Sarli, B., P1536, P3362  
 Sarma, J., P4753, P5676  
 Sarma, S., P3380  
 Sarmento, P., P5600  
 Sarno, G., P1509, P1535  
 Sarnowski, W., P2396  
 Saroglou, G., P1700  
 Sarquella Brugada, G., P2379, P5549  
 Sarquella-Brugada, G., P2377  
 Sarria, A., P4938  
 Sarria, C., P4113, P4114, P4115, P4117, P4120  
 Sarris, I., P2962, P4218  
 Sartiani, L., P409, P567, P3087, P3273, 5052  
 Sartore, S., P5561  
 Sartori, C., 389, P738, 976  
 Sartorio, C.L., P1387  
 Sartral, M., P595  
 Sarubbi, B., P4771, P4781, P4785, 5178, 5181  
 Saruhara, H., 1024, P4011  
 Sarullo, F.M., 5046  
 Saruta, T., P3805  
 Sarzani, R., P4620, 5134  
 Sarzi-Puttini, P., P5435  
 Sasaki, N., P413  
 Sasao, K., P3197  
 Sasse, A., P3063  
 Sata, M., P1558, P4538, 4957  
 Satler, L., P5719  
 Sato, A., P3036  
 Sato, H., P3317  
 Sato, K., P4554  
 Sato, R., P2196, P4629  
 Sato, S., P4520  
 Sato, T., P1386, P2196, P3188  
 Satoh, H., P3220  
 Satoh, M., P1331, 2817  
 Satoh, S., P3932  
 Sattar, N., 1823  
 Sattianayagam, P., 5057  
 Saucedo, J., P4075  
 Saunamaki, K., P3226  
 Saur, J., P3364, 3641  
 Saurin, J.C., P4892  
 Sauter, M., 2912  
 Savage, M.P., P4733  
 Savastano, S., P5641

- Saveleva, G., P1296  
 Savia, G., P1427, P3807  
 Saviano, M., P1408, P2431  
 Savic, L., P427, P443, P444, 5208, P5269  
 Savino, K., P519  
 Savino, M., 5077  
 Savonitto, S., P3177, 4992  
 Savoure, A., 5099  
 Savoye, G., 5099  
 Savu, O.R., P2183  
 Savvas, K., P4013  
 Savvatis, K., P5580  
 Sawada, H., P480  
 Sawada, T., P1517, 3563  
 Sawamura, T., P4477, P5372  
 Sawicki, R., P5712  
 Saxena, A., P777, P2389  
 Sayah, S., 2869  
 Sayarlioglu, H., P4192  
 Saygi, S., P1369, P4701  
 Saygili, E., P807  
 Sayre, J., P2076  
 Sazonov, V., P2250  
 Sbarzaglia, P., P3177  
 Scacchi, M., P3402  
 Scaglia, J., P535  
 Scalese, M., 1106  
 Scali, M.C., P1703  
 Scalise, F., P655  
 Scalone, G., P2226  
 Scalone, S., 5230  
 Scalvini, S., P5471  
 Scanavacca, M., P763  
 Scapigliati, A., P4861  
 Scappini, L., 5134  
 Scarabeo, V., P4799  
 Scarano, M., 987, P3131  
 Scardala, R., P470, P3862  
 Scardovi, A.B.S., P5677  
 Scatturin, M., P3217  
 Scelsi, L., 1212  
 Schaad, F., P1716  
 Schaarschmidt, J., P4195  
 Schachner, T., P2344, 5241  
 Schad, A., P5311  
 Schade, A., P4829  
 Schaeching, V., P4755  
 Schaefer, A., 385, P2355, P2482, P3966, P4589  
 Schaefer, J.R., P2244  
 Schaefer, N., 378  
 Schaefer, H.J., 1156  
 Schaer, B., 247, P3304  
 Schaer, B.A., 5126  
 Schaer, B.S., P4855  
 Schallij, M., P3059  
 Schallij, M.J., P572, P573, P721, P785, P857, 1118, P1351, P1506, P1521, P1639, P1653, P1705, 1911, 2044, 2054, P2157, P2186, P2467, 2819, P3099, P3224, P3296, P3300, 3648, P3866, P3873, P3876, P4082, P4102, P4141, P4546, P4654, P4791, P4903, 4956, 4987, 5088, 5094, 5125, P5272, P5633, P5642  
 Schalla, S., P4528  
 Schalla, S.M., P2981  
 Schaller, S., P1384, P4491  
 Schamberger, R., 346  
 Schaper, W., P2205  
 Scharf, A.W., P812  
 Scharhag, J., 4971  
 Scharin Tang, M., 5050  
 Schartum-Hansen, H., P1295  
 Schattke, S., P4700  
 Schau, M., P2469  
 Schau, T., P4080  
 Schaub, N., P4201, 4985  
 Schaub, R., P2093  
 Schauerer, P., P806, P807, P3056  
 Scheck, O., P3287  
 Scheffold, T., P1269  
 Scheffold, T.H., P4902  
 Scheggi, V., 5184  
 Scheid, C., P5448  
 Scheiman, J., P2095  
 Scheinert, D., 1012  
 Schelbert, H., 398, 902  
 Schelbert, H.R., P2076  
 Schellberg, D., 2768  
 Scheller, B., P1370, P1516, P3206  
 Schellinger, P., P5498  
 Schenk, H.W., P1370  
 Schenk, K., P3072  
 Schepis, T., P1358, P4564  
 Scherhag, A., 3641  
 Scherptong, R.W.C., P3296, P4791  
 Scherr, D., 5223  
 Scherr, M., 5225  
 Scherrer, U., 389, P738, 976  
 Scheurwegs, C., P1607  
 Scheving, S., P3144  
 Schgoer, W., P2189  
 Schiano, V., P5534  
 Schiattarella, G., P1686  
 Schiattarella, G.G., P1408  
 Schiavo, D., P4019  
 Schiavone, D., P464  
 Schiavoni, G., P662  
 Schibgilla, V., P797  
 Schiefer, J., P4186  
 Schieffer, B., P2355  
 Schiele, F., P434, P521, 1958, P2098, 2823, P2935, P3090, P3836, P3839, P3851, P3856, P4037, 5209, P5270, P5271  
 Schiepers, C., 398  
 Schierling, W., P2205  
 Schiewe, R., P2238  
 Schilli, E., 161  
 Schilling, R., 5216  
 Schilling, R.J., P2450  
 Schillinger, M., P3004  
 Schilp, A., P2206  
 Schilp, S., P2308, P3079  
 Schimke, I., P1298, P4700  
 Schimpf, R., P1664, P1669, 2774, P3289, 5123  
 Schindler, C., P4878  
 Schindler, K., P5295  
 Schindler, T.H., P2076  
 Schirdewahn, C., P2956  
 Schirdewan, A., P761, 5218  
 Schirger, J., P810  
 Schirrinzi, S., 5104  
 Schirmer, S.H., P2187  
 Schjerve, I.E., P3802  
 Schlager, O., P5516  
 Schleich, J.M., P1574  
 Schlensak, C., P4142  
 Schlett, C., P3013  
 Schlimmer, N., P3967  
 Schlupp, A., P3025, P4882, 5231  
 Schlitt, A., P2408, P2438  
 Schloemer, K., P2422  
 Schloesser, M., 342  
 Schlosser, T., P1337  
 Schlueter, K.D., 1243, P1412  
 Schlueter, M., P5489, P5518  
 Schmeckpeper, J., 5137  
 Schmeisser, A., P548, P1610, P3385, P4588  
 Schmid, J.-P., P4777  
 Schmid, M., P807, P3868, 5064  
 Schmidinger, H., 345, P860, 5214  
 Schmidt, A., P1415, P1675, P1701, 2768, P4226, P5693  
 Schmidt, B., P757, P1644, P1649, P2429, P4832  
 Schmidt, C., P406  
 Schmidt, C.M.J., P2994  
 Schmidt, C.O., 2675  
 Schmidt, E.B., P5702  
 Schmidt, H., P5655  
 Schmidt, M., P1541, P2451, P4552, P5647  
 Schmidt, M.R., P2130, 5146, P5553  
 Schmidt Pedersen, S., P3162, P3169  
 Schmidt-Schweda, S., 291  
 Schmidt-Tannwald, C., P1540  
 Schmidt-Trucksass, A., P2213, P4541  
 Schmidt-Winter, C., P2145, P3907, P4923  
 Schmitt, B., P4809  
 Schmitt, C., P595, P3821, P4157, 5201  
 Schmitt, K.R., P526  
 Schmitto, J.D., P1693  
 Schmitz, S., P2215  
 Schmitz-Rixen, T., P2206  
 Schmoeckel, M., P4566  
 Schnabel, R., P1294, P1476, P3120  
 Schneeweiss, C., 1153  
 Schneider, B., 346, P1563, P3277  
 Schneider, C., P2120, P5634  
 Schneider, D., 5238  
 Schneider, H., P5639, P5687  
 Schneider, M., 5232  
 Schneider, M.B.E., P2359  
 Schneider, P., P2332  
 Schneider, S., P643, P646, P666, P4512  
 Schneider, T., P3794  
 Schnell, O., P2997  
 Schnorbus, B., P2238  
 Schober, A., P1385  
 Schocke, M., P1347  
 Schoebel, C., P4195  
 Schoeller, B., P3933  
 Schoeller, R., 346, P1497  
 Schoemig, A., P472, P539, P644, P670, 894, P1512, 2929, P2995, 3771, P4711, P5304  
 Schoen, S., P4178  
 Schoenberg, S.O., P3364, 3641  
 Schoendube, F.A., P1693  
 Schoene, N., P1664, P1669, P3289, P3293  
 Schoenemann, C., P1524  
 Schoenenberg, A., P4615  
 Schoenenberger, R., P4878  
 Schoenhofer-Merl, S., P1512  
 Schoepe, M., P1690  
 Schoepp, M., P2469  
 Schofer, J., 2923, P4132, P4136, P4137, 5158, P5507  
 Scholte, A.H.J., P4654  
 Scholte, A.J., P2242, P3011  
 Scholte, A.J.H.A., P1451, P2156  
 Scholte Op Reimer, W.J.M., P5513, P5526  
 Scholz, U., P4820  
 Schomig, A., P684, 1006, P1313, P1332, 2931, 5114  
 Schonberger, J., P3365  
 Schonewille, W.J., P725, P4804  
 Schoonderwoord, B.A., P5614  
 Schoonderwoord, B.A., 235, P5607  
 Schoormans, D., P4764  
 Schopferer, M., P3373  
 Schott, J.J., 5122, P5551  
 Schott, P., P1415  
 Schotten, U., 3779  
 Schou, M., 5076, P5663  
 Schouten, O., 887, 1009, P1706, P2170, P2341, P2509, P2966, P3047, P3978, P3987, P4633, 4947, 5061, P5252, P5485, P5513  
 Schramm, I., P5436  
 Schramm, R., 1156  
 Schramm, T.K., 1821, P2290  
 Schramm, T.K.S., P1440  
 Schranz, D., P2359  
 Schratzberger, P., P2189  
 Schraut, S., P2482  
 Schreckenberg, R., 1243, P1412  
 Schreiber, C., P4798  
 Schreiber, R., P2530, P4942  
 Schreiber, S., P4689  
 Schreieck, J., P555, P574, P1633, P2452  
 Schreier, G., 5223  
 Schreiner, B., P555, P574  
 Schreiner, F., P1445  
 Schrepper, A., P842  
 Schrickel, J.W., P563  
 Schroeckh, S., P4700  
 Schroeder, E., P3228  
 Schroeder, K., P5724  
 Schroetter, H., P1610  
 Schubert, H., P2345  
 Schuchert, A., 1902, 1903, P5610  
 Schuehlen, H., P1497  
 Schuett, H., P761, 5218  
 Schuett, M., P2946  
 Schuette, F., P3375  
 Schuetz, G., 5055  
 Schuh, A., P1385, P3063

- Schuhfried, O., P5516  
 Schuhmacher, S., P3957  
 Schuhmann, C., P2215  
 Schuijf, J.D., P1351, P1382, P1451, P1453, P1521, P2075, P2156, P2242, P3011, P3018, P4622, P4654, 4987  
 Schukro, C., 345, P860, P4039, 5214  
 Schuler, G., 288, P432, P671, P1339, P1340, P1343, P1411, P1583, P1677, P2068, P2480, 2822, P2944, P2950, P2951, P2956, 3528, 3653, P3823, P4690, P4755, 4959, 4963, 4964, 4966, 4972, 5148, P5295  
 Schuler, G.S., 2928  
 Schuleri, K.H., P1338  
 Schulte, C., P3926  
 Schulte-Merker, S., 1246  
 Schultheiss, H.-P., P761, 1123, P2221  
 Schultheiss, H.P., P1523, P1699, P3212  
 Schultz, C., P1329, P1509  
 Schultz, C.J., P4129  
 Schulz, E., P3957  
 Schulz, O., P1298  
 Schulz, R., 2016  
 Schulz, S., P644, P684, 894, P1313, P1332, 2931, P2995, P5304  
 Schulz-Menger, J., 1255, 2020, 2818  
 Schulze, A., P4269  
 Schulze-Bahr, E., P3252  
 Schulze-Neick, I., 5176  
 Schumacher, B., P2461, P4721, P4829  
 Schumann, C., P1614  
 Schumm, J., P2449  
 Schummers, G., P3056  
 Schunck, W.H., P406  
 Schunkert, H., 380, 1113, P1269, P2197, P3375, P3840, P3976, P4656, P4689  
 Schur, R., P1677  
 Schurgers, L.J., P5383  
 Schuringa, J.J., P4875  
 Schuster, M., P4497  
 Schuster, T., P4541  
 Schutte, C., P3059  
 Schutte, C.I., P3099  
 Schuurbiens, J.C.H., 4983  
 Schwaab, B., P2946  
 Schwab, J., 346, 2774, P3277  
 Schwab, J.O., 5221, P5627  
 Schwab, M., 2680, P4595  
 Schwab, S., P5498  
 Schwaibold, M., P3933  
 Schwaiger, M., P4541  
 Schwab, B., P3279  
 Schwammenthal, E., P3017, 3545  
 Schwandt, P., 3538, P3974  
 Schwang, I., P2971  
 Schwartz, L.B., P3206  
 Schwartz, P.J., P4852, 5138  
 Schwarz, A.K., P2096, P4148, P4721  
 Schwarz, S., P4897  
 Schwarzbach, V., 5231  
 Schwarzer, M., P842, P1690  
 Schwarzl, M., P3347, P3825  
 Schwegler, A.C., P2452  
 Schweiger, C., 134, P412  
 Schweikert, R.A., P1620  
 Schweizer, P.A., P2422  
 Schwencke, C., P5489  
 Schwenkglens, M., P4659  
 Schwerzmann, M., P2164, P2349, P4777  
 Schwieler, J., P1637  
 Schwitter, J., 1255, P2965, P3094  
 Sciaraffia, E., P5696  
 Sciarra, L., P4146, P4151, P4826, 5222  
 Sciarretta, S., 5002  
 Sciarretta, S.S., P5677  
 Scicluna, B.P., 3777  
 Scimia, F., P585  
 Scislo, P., P4843, P5337  
 Sciuto, F., P4057  
 Scialfani, G., P407  
 Schneider, H., P547  
 Scognamiglio, G., P4771, P4781, P4785, 5181  
 Scohy, T.V., P3902  
 Sconci, F., P470  
 Scott, B., 5153  
 Scott, G., 3639  
 Scott, J., P3804  
 Scott, N.J.A., P1697  
 Scott, R., P1733  
 Scotton, P.G., P4109, P4123  
 Scramm, T.K., P1439  
 Scridon, A., P1434  
 Scuteri, L., P5520  
 Seabra Gomes, R., P4715, 4993  
 Seabra-Gomes, R., P4736, P5280  
 Seale, J.P., P3986  
 Searle, N., P5340  
 Sebastian, M., P5481  
 Sebastian, R., P577, P5636  
 Sebastiani, F., 5222  
 Sebastiani, R., 1001  
 Sechtem, U., 346, P1282, P3180, P3277, P4548, 5087  
 Seck, C., P5448  
 Secoli, G., P4244  
 Sedding, D., P455, P550, P558, P560, P1396, P5378  
 Sedding, D.G., P544, 2914, P4496  
 Sedej, S., P562  
 Sedkowska, A., P659, P2963, P3230  
 Sedlakova, M., P3240  
 Sedmera, D., P3349, P4481  
 See, C.K., P4924  
 See, F., P3085  
 See, O., P3335, P3901  
 Seetha Rammohan, H., P2515  
 Segal, R., 168  
 Segales, E., P4614  
 Segatto, J.M., P1372  
 Segawa, T., P3904  
 Segers, P., 153  
 Segev, S., P3017  
 Seggewiss, H., P610, P1268, P3280  
 Segovia, I., P1724  
 Segovia, J., P1572  
 Segreti, L., P2358  
 Segura, J., 2000, P4801, 5192, 5199  
 Segura Saint Gerons, J., P5320  
 Segura Saint-Gerons, J., P2481  
 Sehmi, J., 1151, P4645, P5394, P5482  
 Seidel, B., P545  
 Seidel, M., P5705  
 Seidinger, D., P1323, P5516  
 Seidl, K., P1646, P1665, P4157  
 Seidler, T., 291, P1415, P4497  
 Seidlmayer, L., 1242  
 Seifert, M., P2469  
 Seifert, R., P1295  
 Seiler, C., P2164, P3192, P4757, P4758, P4777  
 Seino, Y., P3871  
 Seitelberger, R., P5568  
 Seitun, S., P1352  
 Seixo, F., P3861  
 Seizer, P., P4613, P4867, 5232, P5311  
 Sekiguchi, Y., P1625  
 Sekiguchi, Y., 1923, P3301, P4862, P5649, P5652  
 Sekkali, B., P1416, P3959, 5226  
 Seldenrijk, C.A., P3104, P5387  
 Selima, M., 386, P1483, P2539, P3400, P3931, P3993, P4267, P4946  
 Selimovic, N., P501, P2325, 5166, 5168  
 Selivanova, K., P1432  
 Seljeflot, I., P1468, P2088, P2288, P3333, P4864  
 Sellal, J.M., P3314  
 Sels, J.W., 3564  
 Selton, O., P1645  
 Selton-Suty, C., P508  
 Selvanayagam, J.B., P5340  
 Selvanayagam, J., 5070  
 Semb, A.G., P1481, P4617  
 Semenov, A., P3083  
 Semitko, S., P679  
 Semplicini, A., P3971  
 Semprini, F., P423, P424, P3858  
 Sen, N., P3319  
 Sen, S., P813  
 Senatore, F., P5310  
 Senechal, M., P3792, P4092  
 Senechaud, C., P4164  
 Seneviratne, S.K., 1261  
 Senges, J., P646, P1277, P1634, P2096, P2253, P2990, P2998, P3180, P4148, P4512, P4514, 5150, P5503, P5508, P5509  
 Sengupta, J., P3826, P5488, P5491  
 Senguttuvan, N., P2217  
 Senior, R., P496, 2870, P5340, P5673  
 Seniuk, W., P2396, P3196  
 Senoo, K., P4520  
 Senter, S., P3826, P5488, P5491  
 Seo, H.S., P4466  
 Seo, J.S., P4896  
 Seo, Y., P838, P1625, P2251, P3036, P3908, P5649, P5652  
 Seol, S.H., P4709  
 Seong, I.W., P420, P2982, P2992, P4533, P4676, P5370, P5415  
 Seong, J.K., 2673  
 Sephens, G., 2678  
 Sepp, R., P3280  
 Sepsi, M., P793  
 Serag, A., 2863  
 Seravalle, G., 168, 1017, P3402, P3406, P4022, P5246, P5714  
 Serban, M., 1999, P4817  
 Serban, R.C., P1434  
 Serebruany, V.L., P2084, P2097  
 Serenella Castelvecchio, S.C., 3645  
 Serfaty, J.M., P4099, P5573  
 Serio, A., P486, 1212, 5039, P5484, P5671  
 Sermer, M., P4763  
 Seronde, M.F., P521, P2098, 2823, P2935, P3856, P4037, 5209  
 Seropian, I., 1154  
 Seropian, I.M., P812, P2124, P3367, 5054  
 Serov, R.A., P415  
 Serpi, R., P1417, P3376  
 Serra, A., P2115, P3207, P4051  
 Serra, B., P4111  
 Serra, D.M., P1660  
 Serra, V., 343, P2401, P4058  
 Serra, W., P5347  
 Serra Creus, J., P788  
 Serrano, A., P4641  
 Serrano, C.V., 1150, P2999  
 Serrano, J.A., P4229  
 Serrano Jr, C.V., P3005  
 Serrano-Mollar, A., P557  
 Serrao, M., P2320, 2651, P4018  
 Serruys, P., P3162, P3169, P4715, 4993  
 Serruys, P.W., P639, P696, 897, 1252, P1502, P1508, P1509, P1735, P1742, P2100, P2338, 2930, 2934, P3857, P4030, P4035, P4045, P4046, P4073, P4076, P4077, 4949, 4983, P5280  
 Serruys, P.W.J., P4129, 4954  
 Servillo, L., P3946  
 Sester, M., P4594  
 Sester, U., P4594  
 Sestito, A., P4001, P4578  
 Setakis, E., 1798, P3125, P5476  
 Seteha, M., P5342  
 Seth, S., P2285, P2389, P3086  
 Sethi, A., P5482  
 Setoyama, K., 1923  
 Setzu, T., P584, P2948  
 Seung, K.B., P2982  
 Seung, S.K.B., 5106  
 Sevdalis, E., P4697  
 Sever, M., P5692  
 Severi, S., P4759  
 Severini, D., P2495  
 Severino, A., P461, P4861  
 Sevilla, T., P3795, P4113  
 Seyfarth, M., P684, 1006  
 Sezer, M., 3568  
 Sfikakis, P., P5446  
 Sfirakis, P., P2947  
 Sfyras, N., P4612  
 Sganzerla, P., 5195  
 Sguiglia, G.A., P597  
 Sgura, F., P3229  
 Shabelnikova, O., P1466



- Shaburishvili, T., P2519  
 Shafir, G., P4585  
 Shah, A., P2254, P2542, P4202  
 Shah, B., P2503  
 Shahzad, T., P1404  
 Shakmatova, O., P4693  
 Shakhtshneider, E., P3940  
 Shakur, R., P1426  
 Shalaby, S., 2863  
 Shalev, A., P3194, P3941  
 Shalnova, S.A., P2301  
 Shamiss, A., P1362  
 Shan, P., P1407  
 Shand, J., P4518  
 Shanker, U., 248  
 Shanks, M., 2054  
 Shanmugam, N., P5613, P5704  
 Shantsila, E., P1504  
 Shapira, Y., P2391, P2407  
 Shapiro, S., P1692  
 Sharif, D., P3166  
 Sharma, G., P3341  
 Sharma, R., P831  
 Sharma, R.K., P5338  
 Sharma, S., P600, P2508, P2520, P3124, P3373, P3396, P4239  
 Sharma, S.K., P3225  
 Sharman, J., P4924  
 Sharp, A.S.P., P1544, P2087, P3176, P3201, P4128, 5197  
 Shavarov, A., P3318  
 Shaw, L., 5086  
 Shechter, M., P1475, P2227, P2968  
 Sheffneux, K., P2138  
 Shehi, E., P537  
 Sheiban, I., P1549, P4057, P4723, 5195  
 Sheldon, R., P2471, P2473  
 Shemesh, J., P3017, 3545  
 Shemyakin, A., P3961  
 Shen, E., P5597  
 Shen, L., P627, P1407  
 Shen, Z.J., 4954  
 Shepherd, J., P3122, P3970  
 Sheppard, M.N., P4618  
 Sherif, M., P643  
 Sheshasai, S.R.K., 1823  
 Sheu, M.L., P3203  
 Sheu, S.H., 339  
 Sheung-Wai Li, S.W., P4672  
 Shi, D.M., P651  
 Shi, G.-Y., P2195  
 Shi, L.M., P5459  
 Shi, Y., P1629, P2499, P5418  
 Shi, Y.A.N.F., P4138  
 Shiba, C., 400, P4573  
 Shibuya, M., P5389  
 Shiga, Y., P1379  
 Shiina, K., 170, 1024, P2280, P4011, P4015, P4017, P4671, P5438  
 Shim, B.S., P5354  
 Shim, W.H., P1511  
 Shim, W.J., P3900  
 Shima, M., P4180  
 Shimada, K., P3871, P3989  
 Shimamoto, K., P1388, P1389, P2476, 5141  
 Shimane, A., 5129, P5628  
 Shimatsu, A., P2487  
 Shimizu, H., P691, P5486  
 Shimizu, K., P702, P4554  
 Shimizu, M., 1021, P5479  
 Shimizu, T., P3932  
 Shimizu, W., P3317  
 Shimmyo, T., P3819  
 Shimojo, N., P1331  
 Shimony, A., P3194, P3941  
 Shin, D.G., P2172, P5354  
 Shin, E.-S., P523, P5592  
 Shin, E.K., P1515, P4535, P5400  
 Shin, M.S., P1515, P4535, P5400  
 Shin, S.W.S., 5106  
 Shinagawa, H., P1560  
 Shindo, N., P4707, P4747  
 Shindo, S., 5001  
 Shinke, T., P1517, 3563  
 Shinlapawittayatorn, K., 3778  
 Shinohara, H., P4005  
 Shinsato, T., P633  
 Shiono, Y., P826  
 Shiozaki, A.A.S., P4567  
 Shirai, S., P4568  
 Shiraiishi Isao, I., P2380  
 Shirokova, N., P779, P1615, P1623, P1626, P1627, P1632, P1636, 5215  
 Shishido, T., 3640  
 Shishkin, S.V., P1485  
 Shite, J., P1517, 3563  
 Shivalkar, B., 1256, P4004, P5431  
 Shivu, G., 5179  
 Shkolnikova, M., 246, P780, P786  
 Shkurat, I., P5682  
 Shlueter, M., P1355  
 Shmuel Fuchs, S.F., P1550  
 Shochat, M., P4211  
 Shoji, M., P2196  
 Shokareva, G., P4611  
 Shokawa, T., P3812  
 Shotan, A., P4211  
 Shpektor, A., P2985  
 Shrivastava, S., P4811  
 Shryock, J., P404  
 Shu, X.H., P520, P2363, 2777  
 Shubber, S., 248  
 Shugaev, P., P779, P1615, P1623, P1626, P1627, P1632, P1636, 5215  
 Shuhaib, A., P1346  
 Shuldiner, A., P676  
 Shumkov, K.V., P855  
 Shurupova, I.V., P415  
 Shyu, K.G., P3379  
 Siafakas, N., P5502  
 Siaplaouras, S., P1616  
 Siasos, G., P3044, 5044  
 Sibbing, D., 894, 1006, P1313, P1332, 5114  
 Sibille, C., 5226  
 Sicard, P., P618, P5316  
 Sicari, R., P433, P513, P1528, P1703, P1711, 2048, P2178, 2867, P3885, P3889, P3890  
 Sick, P.B., 3653  
 Siddiqi, N.I., P661  
 Siddique, A., P1504  
 Siddique, S., P3316  
 Siddiqui, S., 1822  
 Sideris, G., P3813  
 Sideris, S., P551, P3400, P3408, P4149, P5708  
 Sidiropoulos, M., 2866  
 Sie, H.T., P758  
 Siebelink, H.J., 1118, P3873, P3876  
 Siedlecka, U., 1241  
 Siegerink, B., P3224  
 Siegrist, P.T., 396  
 Siena, F., P4215, P4247  
 Sierra, G., P4051  
 Sievenpiper, J.L., P1488, 3529  
 Sieverding, L., P4780  
 Sievert, H., 3655  
 Siewert, U., P4656  
 Sigala, F., P2492, P5535  
 Sigalas, P., P5535  
 Sigler, M., P2359  
 Sigurdardottir, V., P2325  
 Sigurdsson, A.F., P3144  
 Sigusch, H., P3287  
 Sigwart, U., P3241  
 Sih, H., P4825  
 Siirila-Waris, K., 2764, 5075  
 Sikkeland, L.I.B., 243  
 Sikora, J., P474  
 Silber, S., P671  
 Silberbauer, J., P678  
 Siliste, C., P507  
 Silletta, M.G., 134, P412, 987, P3131  
 Sillje, H.H.W., 2921  
 Silva, A., P1640, P1642, P2453, P2454, P2463, P3227, P3321, P3888, P5357  
 Silva, B., P4018  
 Silva, E., P598, P2541, P3291, P3302, P3305, P5439, P5636  
 Silva, G., P4915  
 Silva, I.C.M., P2484  
 Silva, J., P2453, P2454, P3069, P4114, P4115, P4117, P4120, P4504  
 Silva, J.A., P1456, P1728  
 Silva, J.C., P5595  
 Silva, K.R., 1925  
 Silva, L., 3656  
 Silva, M.H.C.R., P1695  
 Silva, P., P1564, P3172  
 Silva, R.T., 1925  
 Silva, S., P2276, P2297  
 Silva Ferreira, A., P2081  
 Silva Marques, J., P746  
 Silva-Melchor, L., P773  
 Silvaggio, G., P712  
 Silvain, G., 5200  
 Silvain, J., P431, P1301, P1333, 1952, P2083, P4716, 5207, P5276, P5296  
 Silvano, M., 1115  
 Silveira Moraes, R., P3998  
 Silverman, E.D., P5554  
 Silversides, C.K., P4763  
 Silvestre, C., P4761  
 Silvestre, J.M., P1671  
 Silvestri, F., P3272  
 Silvetti, M.S., 5098  
 Sim, D.S., 3560, 4988  
 Sim, E.K.W., P5388  
 Sim, K.H., P3109, P4539  
 Simamonian, G., P4900  
 Simard, S., 5083  
 Simek, S., P3200  
 Simeonidou, E., P1663  
 Siminiak, T., P3935, P4136, P4137, P5257  
 Simioniciu, A., P2264, P4508  
 Simko, R., P2247, P2249, P5409  
 Simms, A.D., 988, 1797  
 Simoes, L., P3024  
 Simoes, M.V., P3278  
 Simoes, N.S., P3806  
 Simon, J.M., P5467  
 Simon, T., P436, P631, P1442, P2121, 3654, 5109, 5149, P5301, P5467  
 Simon, T.A., P4856  
 Simonia, G.V., P620  
 Simonis, G., 2772, P4178, P4502  
 Simonneau, G., 5173  
 Simonova, G.I., P1485  
 Simonsson, M., P3071, P5556  
 Simonsson, U., P4851  
 Simoons, M.L., 1799, 2003, 4995, 5204, P5464  
 Sims, J.J., P3315  
 Simsek, C., P3162  
 Simsek, E., P2173, P5698  
 Simsek, V., P514, P2237  
 Sin, B., P4518  
 Sin, D.D., P2243  
 Sinagra, G., 1213, P3259, P3264, P3272, P4244  
 Sinatra, R., P407  
 Sindler, M., P793  
 Sinescu, I., P5659  
 Singer, D., P4198  
 Singh, K., 2771  
 Singh, M., P2273, P2309  
 Singh, P., P2309  
 Singh, S., 131, 165, P2285  
 Singh, V., P2503  
 Singh-Manoux, A., P5441  
 Sinha, A., P1541  
 Sinha, A.-M., P4552  
 Sinha, A.M., P1634, P2451, P5647  
 Siniawski, H., 1005  
 Sinityn, V., P4544  
 Sinkiewicz, W., P3190  
 Sinnaeve, P., 5111, 5153  
 Sinner, M.F., 1108  
 Sinning, C.R., P1294, P1476, P3120  
 Sinning, D., 1123  
 Sinno, M., 1822  
 Sionis, A., P438, P5691  
 Sionis, D., P5393  
 Siostrzonek, P., P3258, P4032  
 Sipciu, D., P3995  
 Sipido, K.R., P4639

- Siquini, W., 5134  
 Sirbu, C., P2329  
 Sirbu, V., P4072, 5211  
 Siren, R., P5474  
 Sirenko, V., P557, P4641  
 Sirenko, Y.U., P4272  
 Sirico, G., P5527  
 Sirma, D., P3326  
 Sirois, M.G., P603  
 Sirotiakova, J., P5709  
 Sirvente, R.A., P2484  
 Sisu, R., 335  
 Sisu, R.C., P507, P3354  
 Sitafidis, G., P2144  
 Sitges, M., P1559, P1617, P3337, P5608, P5636  
 Sitia, S., P5435  
 Sitta, N., 1924, P4837  
 Siu, C.H.W., P800  
 Siu, C.W., P478, P1482, P3339, P4672, 4968  
 Siu, D., P808  
 Siu, S.C., P4763  
 Siudak, Z., P683, P3179  
 Siva, M., P2084  
 Sivakumaran, R., 1823  
 Sivaprasad, K., P3927  
 Sivasinprasasn, S., P4680  
 Six, A.J., 1956  
 Sjaastad, I., P824, P1410  
 Sjoquist, P.O., P4484  
 Sjolie, B., P5313  
 Skadsberg, N., 1922  
 Skala, T., 3649, P3879  
 Skalicka, H., P3200  
 Skalidis, E.I., P1547, P2257, P2259, P4749  
 Skaltsounis, A.L., P1484, P2492  
 Skapinakis, P., P4013  
 Skapura, D.G., P3380  
 Skarantavos, G., P2220  
 Skaroupkova, P., P3349  
 Skaug, E.A., P2945, P3803  
 Skeva, I., P2282  
 Skiadas, I., P2535, P3134, P4009, P4922  
 Skianis, G., P4023  
 Skilton, M., 2648  
 Skodova, Z., P5494  
 Skopelitis, E., P635  
 Skopelitis, H., P878  
 Skora, E., P637  
 Skorak, I., P1308  
 Skoric, B., P1308, P2340  
 Skorniakov, V., P3999  
 Skoro-Sajer, N., P713, P1613, 5177  
 Skoromnaya, A., P2988  
 Skott Andersen, S., P3130  
 Skoularigis, J., P2144, P2513  
 Skoumas, I., P1446, P2265, 3542  
 Skoumas, J., P468, 1014, P1486, P1489, P2228, P3126, P3981, P4217, P4692  
 Skowasch, D., P4592  
 Skowerski, M., P2425, P4834  
 Skrbic, R., P3116  
 Skretteberg, P.T., P4679  
 Skrypnik, D., P2985  
 Skuk, D., P3092  
 Skuladottir, G.V., P3338  
 Skulstad, H., 292, P2175, P3865, P5631  
 Skuratova, M., P4511  
 Skvaril, J., P1729  
 Slama, M., P2967, P4729  
 Sleilat, G., P4863  
 Silhessarenko, J.R.S., P4567  
 Slimi, A., P2376  
 Sliwa, K., 341, 2769, P3798, P4877, P5588  
 Sloan, S., P3008  
 Sloerdahl, S.A., P2945  
 Slonka, G., P474, P5288, P5307  
 Sloth, E., P2130  
 Sluijter, J.P.G., 1246, P1428  
 Slusser, J., 5060  
 Sluysmans, T., 5165  
 Small, G.R., P804, P3911  
 Smallwood, A., P2089  
 Smaniotto, G., P3233, P3250  
 Smarz, K., P3925  
 Smedema, J.P., 341  
 Smedsrud, M.K., P3306, P5366  
 Smeeth, L., P5433  
 Smeets, M., 2017  
 Smeets, M.B., P4488, P4501  
 Smetana, P., 5108  
 Smid, M., P1368  
 Smilakos, P., P2962, P2986  
 Smirnova, M., P4544  
 Smiseth, O.A., 1116, P2175, P3306, P3865, P5313, P5366, P5631  
 Smit, J.J.J., P1311, P1635  
 Smit, J.W., P1453  
 Smit-Van Oosten, A., P742  
 Smith, A.L., 123, P4222  
 Smith, B., P1580  
 Smith, B.A., 1105, P2542  
 Smith, B.C.F., P500, P5362  
 Smith, C., P1327  
 Smith, G., 4973  
 Smith, G.C., P3285  
 Smith, G.C.S., P4665  
 Smith, G.L., P553, P820, P3391, 5053  
 Smith, H., P3822, P5688  
 Smith, H.J., P3865  
 Smith, J., P4795, P4797, P5684  
 Smith, J.G., P4838  
 Smith, L., P1532  
 Smith, M., P475  
 Smith, R.E.A., P4249, P5643  
 Smith, S.C., P3141  
 Smith, T., P2462  
 Smithson, L., 1154, P2124  
 Smits, P., P4075  
 Smolarczyk, R., P3080  
 Smolderen, K.G., P3159, P5525  
 Smolderen, K.G.E., P3164  
 Smolis-Bak, E., P4859  
 Smolka, W., P2253  
 Smulders, M.W., P1375  
 Smuszkiewicz, P., P5257  
 Smyth, Y.M., 397  
 Sniezek-Maciejewska, M., P1320, P2313  
 Snijder, R.J., P725, P737, 5174  
 Snoep, G., P2981  
 Snyman, T., P5588  
 Soares, L., P877, P1538, P4941  
 Soares, P.R., P538, 5191, P5480  
 Soares, R.M., P614  
 Sobczak, A., P2315  
 Sobel, B.E., 5238  
 Sobhy, M., 1955, P2118, P5255  
 Sobic-Saranovic, D., 3565  
 Sobiczewski, W., P4515  
 Sobien, B., P5562  
 Soboleva, S., P2543  
 Sobral-Filho, D., P3998  
 Sobrino, J.A., P3299  
 Socas, A., P1619  
 Soccia, F., P701, P714, P719, 5184  
 Socras Crespi, L., P788  
 Socrates, T., P4201, P4213, P4240, P4243  
 Socrates, T.H., 5078  
 Soda, T., P2196  
 Sodeck, G., P3004  
 Soeki, T., P1558, P4538, 4957  
 Soemantri, S.P., P3072  
 Soerensen, J.T., 5146, P5286  
 Soerensen, K.E., P4816  
 Soerensen, R., P1439  
 Sofi, F., 155, P5472, P5536  
 Soga, J., P2216, P5541  
 Soga, T., P3818  
 Soga, Y., P1717, 1900, 2642, P4568, P5519  
 Sogorb, F., P657, P4858  
 Sohn, D.-W., P4647, 5095  
 Sohn, D.W., P3938, P5629  
 Sohn, H., P5705  
 Sohn, H.Y., P2215, P2332  
 Sohn, J.W., P5367  
 Sohns, C., P706  
 Soja, A.M.B., 1826, P3170  
 Sokal, A., P3080  
 Sokmen, A., P4192  
 Sokmen, G., P4192  
 Sokolis, D.P., P5490  
 Solar, R.J., 290  
 Solarino, G., P2358  
 Solaro, R., 1245, P2198  
 Solberg, E.E., P4694  
 Soldani, G., P2198, P2199, P2201  
 Soldati, E., P2358, P5651  
 Soldati, G., P3094  
 Soler, C., P4094  
 Soler, R., 1211  
 Solheim, S., P2288, 5224  
 Soliman, H., P2500  
 Soliman, O.I.I., P493, P2147, P2166, P3381, P3902, 5126  
 Solnon, A., P2141  
 Solodky, A., P649, P4585  
 Solomon, S., 1099  
 Solomon, S.D., 240, 1105, P2542, P4202, 5081  
 Soloperto, G., P4618  
 Solskov, L., P4490  
 Solti, I., P1418  
 Som, Z., P3343  
 Somers, S.J., P4486  
 Somers, V.K., P4025  
 Sommariva, E., P784  
 Sommer, P., P764, P766, P4187, P4825, P4854  
 Sommermeyer, D., P3933  
 Son, J.W., P4066  
 Sonderegger, G., P1464, P2262  
 Sondergaard, L., P4795, P4797  
 Sone, T., P692  
 Song, I.W., P2172, P5354  
 Song, J.H., P4118  
 Song, J.K., P499, P4896  
 Song, J.M., P4896  
 Song, W., P2258  
 Song, X., P2258  
 Song, X.D., P1730  
 Song, Y.B., 1096  
 Songco, G., P5388  
 Sonmez, K., P1584, P1611, P5325  
 Sonnabend, M., P4690, 4963  
 Sonne, K., P4188  
 Sonntag, S.M., P5705  
 Sonntag, U., 894  
 Sonoda, H., P476, P3983, P4667, P4678  
 Sonoda, S., P3199  
 Soo, W.M., P4580  
 Soon, C.Y., P627  
 Soon, K.H., P5308  
 Soppa, G.K., 1241  
 Sora, N., P2455  
 Sorbera, C., P1670  
 Sorbo, S., P5505  
 Soregaroli, D., P3217  
 Sorensen, J.T., P5290  
 Sorg, S., P4142  
 Soria, F., P4259  
 Soriano, C.J., 5080  
 Sorodila, K., P2268  
 Sorop, O., P3205, P3209, P3210, P3211, P3968  
 Sorour, K.A., P4119  
 Sorrenti, P., P794  
 Sorrentino, S., 3778  
 Sorriento, D., 1019, P2191, 2917  
 Sosa, E., P763  
 Sosa, E.A., P4698  
 Sosnowski, C., P4859  
 Sosnowski, M., P2315, P2425, P3918, P4561, P4834, 5065  
 Sossalla, S., P706, 903  
 Sotiropoulos, H., P4149  
 Soto, M.E., 391  
 Soucek, R., P569  
 Souchet, T., P2250  
 Soufflet, V., P4805  
 Soukagos, P., P2220  
 Soulef, G., P4251  
 Souletie, N., P1608  
 Soulis, D., 164, P2538, P3044, P4907, P5351  
 Souretis, G., P3134, P4009  
 Sourides, V., P5251, P5393  
 Souridis, V., P792

- Sousa, A.C., P533, 3775, P4642, P4683, P4687  
 Sousa, A.G.M.R., P583  
 Sousa, A.G.P., P458  
 Sousa, C., P4469, P5363, P5364  
 Sousa, F., P2491, P4530  
 Sousa, J.M.A., P3853  
 Sousa, O., P4915  
 Sousa, P., P611, P1495, P3227, P5281  
 Sousa, P.J., P1728, P2296, P3038  
 Sousa Uva, M., 5236  
 Sousa-Uva, A., P1495  
 Souza, A.G.M.R.S., P4567  
 Souza, F.A., P3403  
 Souza, G.E.C.S., P5699  
 Souza, L.E., P2484  
 Spacek, R.S., 2924  
 Spada, R.S., P3916  
 Spadacini, G., 5101  
 Spadera, L., P5534  
 Spadoni, I., P2346, P2381  
 Spagnoletti, G., P2953  
 Spampinato Torcivia, R., P2310, 5244  
 Spandidos, D.A., P694, P1546  
 Spano, F., P1351  
 Spanos, A., P1324, P2321, P2955, P4730  
 Spanos, P., P4935  
 Spanou, D., P5664  
 Spanoudaki, E., P5396  
 Spargias, K., P3791, P5576  
 Sparwasser, T., P4590  
 Spatuszko, A., P474  
 Spaulding, C., 2923, P3809, P3810, P4158, P4705, 4991  
 Spaziani, G., P699  
 Specchia, G., P655  
 Specchia, L.S., 1011  
 Speck, U., P1516, P3206  
 Speggos, K., P2364, P3898  
 Spehl, S., P4829  
 Speidl, W.S., P5376, P5407  
 Spencer, K., P3382  
 Spencker, S., P761, P2444  
 Spevak, P., P5545  
 Spicher, A., P3067, P3070  
 Spiess, J., P1345, P1376  
 Spijkerboer, A.M., P1381, 2001  
 Spijkerman, A.M.W., P3113  
 Spiller, D., P2199, P2201  
 Spillner, J., 5064  
 Spina, G.S., P4091  
 Spinar, J., P425, P2987, P4227  
 Spinelli, L., P4890  
 Spinelli, T., P1490  
 Spinelli, V., P3087  
 Spinucci, G., P4688  
 Spiroglou, S., P529, P5397  
 Spitzer, S.G., P2997  
 Spodick, D., P5571  
 Spognardi, A.-M., P2323  
 Spoladore, R., P2504  
 Sponton, C.H.G., P3806  
 Spontoni, P., P1454, P5249  
 Spooner, R., 241, P4220  
 Sporton, S., P2450, 5216  
 Sportouch-Dukhan, C., P5586  
 Sposito, A.C., P2256  
 Sprangers, M.A.G., P4764  
 Spratek, R., P868  
 Sprenger, C., 3651  
 Springeling, T., P660, 1252, P4035  
 Springer, J., 239, 5058  
 Squire, I., P3844  
 Squire, I.B., 283, 1959, 2671, P3855, P5306  
 Srebot, V., P3833  
 Sredniawa, B., P2963  
 Sreeram, N., P776, P2374, P3320  
 Srej, M., P3309  
 Srimahachota, S., P2351  
 Sritara, P., P4655  
 Srivastava, S., P1494  
 Staal, E.M., P865  
 Stabile, G., 5217  
 Stabryla-Deska, J., 1147, P2963  
 Stach, K., P4636  
 Stachon, P., P5375  
 Stachowiak, W., P2396  
 Stack, A.G., P2294  
 Stadler, C., P4626  
 Staehle, F., 161  
 Staempfli, S.F., P3947  
 Staessen, J.A., 163, P542, P3940  
 Stafford, P.J., P2427, P2460, P4824  
 Stahlberg, M., 2762  
 Stahle, A., 2820  
 Stahlman, M., P5414  
 Staiger, C., 5041  
 Stain, N., P2457, P2465  
 Staines, H., P830, P2277, P2969  
 Stakos, D., 898, P2488, 3772, P4208, P4780  
 Stalder, M., P2414  
 Stalenhoef, A.F.H., P2244  
 Stalleicken, D., P3957  
 Staller, B., P1664  
 Stam, H., P2243, P5252, P5524  
 Stamatopoulos, K., P2534, P4944  
 Stamatelopoulos, K.S., P5446  
 Stamatopoulos, E., P4907  
 Stamboulis, E., P5502  
 Stampehl, M., 2045, P2146  
 Stanciu, S., P4652  
 Standeven, K.F., P2104, 5118  
 Standeven, K.S., P2102  
 Stanescu, C., P5660  
 Stanescu, C.M., P3995, P4649  
 Stanescu, D., P3995  
 Stang, P.D., P4167  
 Stangl, K., P732, P1419, P3955, P4599, 5140, P5580  
 Stangl, V., P3955, P4599, 5140  
 Stankovic, I., P3117  
 Stankovic, S., P444  
 Stanton, T., 890, 2046, P4908  
 Stapel, B., P3372, 5225  
 Staples, P., P1720  
 Stapor, R., P1320  
 Starczewska, M.H., P5315  
 Stare, J., P3118  
 Stark, K., P4689  
 Stasch, J.P., P1577  
 Stassaldi, D., P4927, P4939  
 State, S., P3314  
 Stathopoulou, E.M., P2103  
 Staudacher, I., P2422  
 Staudt, A., 2674, P4248, P4888  
 Stauffer, J.-C.H., P4164  
 Stavenow, L., 167  
 Stawowy, P., P1321, P4606  
 Steck, H., P4757  
 Steckiawicz, R., P1562  
 Steedman, T., P821, 1254, P4751  
 Steen, H., P3234  
 Steenblik, M.H., P5548  
 Steendijk, P., P1693, P2179, P3059, P3347, 3648, P3825, P4885, P4903  
 Steenman, M., P4849  
 Steeples, V., P3965  
 Stefanadi, E., 395, P452, P524, P647, P879, 1023, P1324, P1462, P1483, P1522, P2529, 2644, P2955, P3204, P3400, P3408, 3559, P3923, P3931, P4023, P4064, P4627, P4682, P4730, 4984  
 Stefanadis, C., 162, 164, 386, 395, P449, P452, P453, P466, P468, P473, P524, P536, P551, P607, P625, P634, P638, P647, P859, P867, P869, P879, 1014, 1020, 1022, 1023, P1287, P1292, P1324, P1443, P1446, P1462, P1483, P1486, P1489, P1522, P1529, P1682, P1698, P2109, P2185, P2200, P2209, P2212, P2224, P2228, P2232, P2236, P2265, P2284, P2286, P2311, P2321, P2364, P2527, P2529, P2531, P2532, P2535, P2536, P2538, P2539, 2644, P3044, P3126, P3134, P3146, P3171, P3204, P3242, P3400, P3405, P3408, P3410, 3536, 3542, 3559, P3898, P3915, P3917, P3919, P3921, P3922, P3923, P3929, P3931, P3937, P3972, P3973, P3981, P3990, P3993, P4009, P4023, P4064, P4149, P4217, P4253, P4256, P4258, P4265, P4266, P4267, P4270, P4612, P4627, P4682, P4686, P4692, P4697, P4702, P4730, P4907, P4919, P4922, P4928, P4930, P4935, P4936, P4940, P4946, 4984, 4998, 5044, 5136, P5298, P5341, P5345, P5346, P5351, P5390, P5395, P5417, P5419, P5421, P5533, P5550, P5667, P5703, P5708, P5711, P5721  
 Stefanadis, C.H., P781, P2955  
 Stefanczyk, P., P756  
 Stefanelli, S., P4206  
 Stefanini, G., P2354  
 Stefanou, D., P739  
 Stefanovic, B., P444, P2126  
 Stefansson, K., 3776  
 Stefenelli, C., P4100  
 Steffel, J., P5385, P5604  
 Steffen, D., 244  
 Steffenino, G., P3177  
 Steg, G., P2977, 5109  
 Steg, P.G., 156, P629, 1800, 1952, P2293, P3141, P5722  
 Steg, P.H.-G., P4536  
 Stegemann, B., P4249  
 Stegherr, J., P1313, 5114  
 Stegnar, M., P3118  
 Stehl, C., P1343  
 Stehlik, J., P816  
 Steiger, H., 1257  
 Steigerwald, K., P1512  
 Stein, J., P1563  
 Stein, M.A.S., 378, P3944  
 Steinbeck, G., 2915, 3651, P4836, P4841  
 Steinbeck, K., P3986  
 Steinberg, G.R., 5135  
 Steinberg, J.S., 233  
 Steinbronn, N., P3385  
 Steine, K., P4694  
 Steiner, S., P1323  
 Steiner-Boeker, S., P5516  
 Steinhoff, G., P3088, P3095  
 Steinkamp, H., P5518  
 Steinmetz, M., 382, P4592  
 Steineseifer, U., P2408  
 Steinshamm, S., P509  
 Stella, P.R., P2136, 4991, P5312  
 Stellbrink, C., 342  
 Stellin, G., P2383  
 Stellos, K., P3096, 3772, P4613, P4780, P4867, P5311  
 Stelzig, C., P4201, 5078  
 Stenberg, T.A., P3884  
 Stensvold, D., P2945  
 Stenzel, M.A., P5327  
 Stepanovic, J., P3117, 3565, P3878, P5331  
 Stepien, E., P446, P5537  
 Stepien, E.L., P2313  
 Stepina, E., P4584  
 Stepinska, J., P1420, P4125  
 Stepnowska, M., P593  
 Steriotis, A.K., 1209, P1267  
 Sterlinski, M., P609, P1668  
 Stern, H., P4541  
 Steurer, S., 4985  
 Steven, D., 5097  
 Stevens, A., P615  
 Stevens, M., P1459, P4471, P4883  
 Stevens, W., P1591  
 Stevenson, J., P582  
 Stevenson, W., 5097  
 Stewart, A.G.O., 5014  
 Stewart, D.J., P3084  
 Stewart, J.A., P3141  
 Stewart, S., 124, P3140, P3798, 4981, P5523, P5528, P5588  
 Stewart, S.S., P4877  
 Stheneur, C., P5546  
 Stiasny, B., P5555  
 Stibenz, D., P4584  
 Sticchi, E., P5536  
 Sticherling, C., 247, P1657, P3304  
 Sticherling, C.S., P4855  
 Stieger, P., P550, P558, P1396, P5378  
 Stieger, P.H., P4496  
 Stifano, G., 1095

- Stiles, M., 1920  
 Stiles, M.K., P2426, P2443, P3341, P5560  
 Stillitano, F., 1238, P3273, P3386  
 Stillitano, S., 5052  
 Stillman, A., 5086  
 Stimson, P., P5684  
 Stio, R., P3862  
 Stirrup, J., P831  
 Stix, G., 345, P860, 5214  
 Stobakk, P.K., 4970  
 Stock, U.A., P4127  
 Stockburger, M., P5624, P5655  
 Stoddard, G., P816  
 Stoeckigt, F., P563  
 Stoel, M.K., P5468, P5469  
 Stoerk, S., P417, P4245  
 Stoettrup, N.B., P4490  
 Stoiber, K.M., P1614  
 Stoickov, V., P619  
 Stojakovics, T., P621  
 Stojanovic, B., P4199  
 Stojanovich, L.J., P4176  
 Stojkovic, S., 3565, P5331  
 Stokkel, M.P., P2075, 4987  
 Stokkel, M.P.M., 2819  
 Stokkos, K., P1672, P2257, P2259  
 Stolarz-Skrzypek, K., 163  
 Stolen, T., P3395, P3802, 4970, 5053, P5707  
 Stolf, N., P1671  
 Stoll, H.P., P639, 2923  
 Stoll, V.M., P2989  
 Stolte, D., P1610, 5187  
 Stone, G., 5196, 5211  
 Stone, G.W., P645, 1957, 2933, P3850, 5210  
 Stone, P.H., 899, P4069, P4602, P4619, P4760  
 Storey, R.F., P1310  
 Stork, S., 5082, P5670  
 Storozhakov, G.I., P836  
 Storti, C., 5104  
 Storti, E., P3949  
 Stoschitzky, G., P5324  
 Stoschitzky, K., P5324  
 Stottrup, N., 5142, P5553  
 Stougiannos, P., P3268  
 Stout, D., 902  
 Stoylen, A., P482, 2049, P3802, P5707  
 Strachan, M.W.J., P2102  
 Stradling, J., P4542  
 Strain, J., P3804  
 Straka, Z., P2446  
 Strandberg, T., P2275  
 Stranden, E., P4694  
 Stranges, S., P1473  
 Stranieri, C., P2278  
 Strasberg, B., P2391  
 Strasser, R.H., P548, P1610, 2772, P3385, P4178, P4502, P4588, 5187  
 Strata, E., 1253, P3360, P4549  
 Stratford, P.W., P3062  
 Stratiev, V., P3813  
 Stratigou, A., P3886  
 Stratz, C., 5116  
 Strauss, H.W., 394  
 Strauss, M., P1646, P1665, P4157  
 Streb, W., P749, P2133, P2393  
 Streitner, F., P1664, P1669, P3289, P3293, 5123  
 Stridsberg, M., P824  
 Stritzke, J., P3976, P4656  
 Strnad, H., P3349  
 Strodthoff, D., P4590  
 Strojek, K., P2963  
 Stromberg, A., 127  
 Stronger, L., P3816  
 Stros, P., P791, P2446  
 Strotmann, J., P5359  
 Strotmann, J.M., P3897  
 Strotmann, J.S., 2861, P4105  
 Struck, J., 285, P828, P3820, P4224, P4670  
 Strunk, G., P828, P4216, P4224  
 Struthers, A.D., P429, 2815  
 Struwe, C., P3254  
 Stuart, A.G., P604, 2004  
 Stuart, B., P5344  
 Stub, D., 4951  
 Stuber, T., P738, 976  
 Stuehr, D.J., P5406  
 Stukalova, O., P4544  
 Stumpf, C., P467  
 Stumpf, J., P2997  
 Stumvoll, M., 4963  
 Styckiewicz, K., P1427  
 Styczkiewicz, K., P872, P1435, P3807  
 Stypmann, J., P2418  
 Su, D.F., P3412  
 Su, H.M., 339  
 Su, J., P4658  
 Su, L.P., P3073, P5388  
 Su, Y.G., 2777  
 Suades, R., P4614  
 Suarez, C., P2293, P5454  
 Suarez De Lezo, J., 1951, 2000, P2306, P2369, P2481, P4718, P4801, 5192, 5198, 5199  
 Suarez De Lezo Cruz Conde, J., P2305, P5320  
 Suarez De Lezo Jr, J., P4718, 5192, 5198, 5199  
 Subirana, T., P1572  
 Such Belenguer, L., P606  
 Such-Miquel, L., P606  
 Suchon, E., 2009, P4818  
 Suda, K., 2007, P2362  
 Sudano, I., P1372, P3414, P4659  
 Suddath, W., P5719  
 Sueda, S., P4021  
 Suessenbacher, A., P4626  
 Suffredini, S., P567, P3273, 5052  
 Sufate, E.S.S., P1666  
 Sugidachi, A., P1310  
 Sugimachi, M., P3317, 3640  
 Sugimoto, H., P4078  
 Sugimoto, K., P4477, P5372  
 Sugioka, J., P437  
 Sugiura, E., P3352  
 Sugiura, T., P2127, P4660, P4668  
 Sugrue, D., 251  
 Suh, J., P4466  
 Suh, J.-W., P2108  
 Suh, J.W., 1258  
 Suh, W.-W., P4647  
 Suijver, F., P1629  
 Suk, J.H., P730  
 Sukhorukov, O., P679, 2826  
 Sukhova, G.K., 899  
 Sula, F., P2976  
 Sulaiman, H.M., P2516  
 Sulcaj, L., P4711  
 Sulemane, S., P500, P748, P3872  
 Sulke, A.N., 248, 250  
 Sullivan, K., P4597  
 Sumegi, B., P1418  
 Sumi, S., P2478  
 Sumida, T., P1582  
 Sumimoto, T., P4062  
 Sumiyoshi, M., 284  
 Sumner, G.L., P2471, P2473  
 Sun, C.K., P3100  
 Sun, K., 152, P2258  
 Sun, M., 1250, P1335, P1336  
 Sun, N.L., P3137, P3412  
 Sun, S., P1738  
 Sun, Y.H., P3148  
 Sunagawa, Y., P2487  
 Sund, R., 2764  
 Sunde, M., P526  
 Sundstrom, E., P3071, P5556  
 Sung, J.K., P2091, 3558, P4648, P4651  
 Sunier, Y., P4243  
 Sunitha, M., P5522  
 Suominen, S., P5441  
 Superko, H.R., P2246  
 Sura, T., P4655  
 Surber, R., P2449  
 Surdacki, A., P2958  
 Surder, D., P3094  
 Sureda, A., P632, P2298, P3854  
 Suresh, K., P3927  
 Surowiec, S., P2269  
 Suryapranata, H., P671, P3213, P5264, P5291  
 Susen, S., P1568, P2204  
 Sutcliffe, S., P4160  
 Suter, S., 5093  
 Suter, T., P3797  
 Suter, Y., P4615  
 Sutherland, G.R., P459, P2148, P2384, P3884, P5552, P5613, P5704, P5716  
 Sutton, A.G.C., P5284  
 Suttrop, M.J., 2008, P4034, P4804  
 Suty-Selton, C.S.S., P4110  
 Suvorava, T., P2222, P3960  
 Suwa, S., 284  
 Suzuki, H., P2196  
 Suzuki, K., P612, P4756  
 Suzuki, M., P4078, 5000  
 Suzuki, N., P1288, P4754  
 Suzuki, S., 2825  
 Suzuki, T., P688, P1366, P1505, 2925, 2934, 3562, P4554  
 Suzuki, Y., P1288  
 Svatec, E., P4210  
 Svendsen, J.H., P775, P1622  
 Svensson, L., P2979  
 Svensson, T., P2459  
 Sverdlow, A.L., P2233  
 Svingen, G., P1295  
 Sviridov, D., 5135  
 Svobodov, A.V., P415  
 Swaans, M.J., P737  
 Swan, L., P4766, P4768  
 Swanson, N., P5284  
 Swedberg, K., 5081  
 Swedenborg, J., P4608  
 Swee, D.S., P1365  
 Swenne, C.A., P721, P3296, P4791  
 Swiatek-Rawa, E., P5590  
 Swiatkowski, A., P659, 1147, P2133, P2963  
 Swidnicki, B., P1577  
 Swierad, M., P440, P659, P2133, P3143  
 Swildens, J., P3099  
 Sychev, D.A., P2439  
 Sydorchuk, I.I., P1739, P2208, 4996, P5392  
 Sydorchuk, L., P1739, P2208, 4996, P5392  
 Sydorchuk, R.I., P1739, P2208, 4996, P5392  
 Syed, F.F., P5577  
 Syeda, B., P2158  
 Sylvain, J., P3852  
 Sylven, C., P3071, P5556  
 Synetos, A., 395, P452, P647, P1324, P1462, P1522, P2955, P3204, 3559, P4064, P4627, P4730, 4984  
 Syrris, P., P1698, P3242, P5396  
 Syrseloudis, D., 164, P551, P607, P869, P879, P1483, P2212, P2232, P2286, P2535, P2536, P2538, P2539, 2644, P3146, P3408, P3410, P3923, P3931, P3993, P4023, P4253, P4256, P4258, P4270, P4682, P4922, P4928, P4940, P4946, P5419, P5708  
 Syska, P., P1668, P3262  
 Szabo, A., P1736  
 Szabo, B., P4233, P4234  
 Szabo, G., P545, P2324  
 Szabo, N., P4234  
 Szabo, T., P1679, 5058  
 Szala, S., P3080  
 Szantho, G.V., P604, P2365  
 Szardien, S., P3371  
 Szastak, G., P2958  
 Szczech, R., P3139  
 Szczesniak, P., P1293, P1297  
 Sze, S.K., 2018  
 Szenasi, G., P5615  
 Szewczyk, G., 5183  
 Szilagyi, S.Z., P3309, P5626  
 Szili Torok, T., P4147  
 Szili-Torok, T., P3343, P4821, 5126  
 Szkodzinski, J., P5278  
 Szkutnik, M., 2010  
 Szmilkowski, M., P5712  
 Szot, W., P4480  
 Sztajzel, J., P3895, P5500  
 Sztajzel, R., P3895, P5500  
 Sztéfko, K., P2313  
 Szucs, T., P4659  
 Szuffladowicz, E., P4163  
 Szulik, M., P483, P485

- Szumowski, L., P4163, P4772  
 Szwed, H., P609, P1668, P3262, P4859  
 Szydło, K., P442  
 Szymanski, C., P2395  
 Szymanski, P., 2766  
 Szymczyk, E., P484, P3874  
 Szyndler, A., P3139
- Tabata, Y., P5515  
 Tabbal, M., P3119  
 Tabbalat, R., P5253  
 Tabib, A., P1392  
 Tabib, A.T., P4500  
 Tabor, Z., P442, P2458  
 Taborska, K., P720  
 Taborsky, M., 234, P4872  
 Tabosa Do Egito, E., P3998  
 Tabrizi, F., P1637  
 Tabuchi, T., 2817  
 Tacchino, R.M., P4001  
 Tacoy, G., P832  
 Tacu, D., P5659  
 Tada, H., P1625, P3301, P3908, P4862, P5649, P5652  
 Tada, K., P3818  
 Tada, N., P5479  
 Taddei, S., P1458, P2207, P3414  
 Tadehara, F., P3215, P5541  
 Tadehara, F.T., P3812  
 Tafanelli, L., P4107, P5635  
 Tafflet, M., 255, 2775, P3810  
 Taggart, D., P2311  
 Tagliani, M., 1212  
 Taglieri, N., P3848  
 Taguchi, I., P4921  
 Tahara, N., 393  
 Tahin, T., P3309, P5626  
 Tahk, S.J., P1380, P1553, P4016  
 Tai, T., P2349  
 Tajiri, K., P1331  
 Tajstra, M., P474, P5288, P5307  
 Takagi, G., P1491  
 Takagi, I., P733  
 Takahashi, S., P689, P3041, P4569  
 Takahashi, T., P471, P2119, 5143, P5302  
 Takahashi, Y., 2817, P4467  
 Takaki, H., P3317  
 Takamura, T., P3352, P4876  
 Takanari, H., P402  
 Takano, H., P1491, 5001  
 Takano, M., P1491  
 Takarada, S., 900, P1278, P1304, 3561, 3566, P4052, P4472  
 Takase, H., P476, P3983, P4667, P4678  
 Takase, K., P3041, P4569  
 Takashima, H., 2676  
 Takashima, N., P5683  
 Takasugi, M., P4177, P4179  
 Takasugi, N., P3899, P4177, P4179  
 Takata, Y., 1024, P4011, P4062, P4587  
 Takaya, T., P2487  
 Takayama, K., P1367, P3015  
 Takayama, M., P733  
 Takayama, T., P4060  
 Takayanagi, K., P1548  
 Take, Y., P488  
 Takebayashi, H., P693  
 Takeda, K., P1348, P4559  
 Takeda, Y., P3819, P4078, P4660, P4668  
 Takehana, H., P1560  
 Takei, K., P2385  
 Takeishi, Y., P4477, P5372  
 Takemoto, K., P4467, P4472  
 Takemoto, Y., P402  
 Takemura, G., P2478, P2483, P3899, P4071, P4177, P4179, P4572, P5515  
 Takenaka, K., P3867, P3932  
 Takeno, M., 1146  
 Takens, J., P742  
 Takeuchi, I., P1560  
 Takeuchi, M., P2143, P2181, 5092  
 Takeyama, T., P4177, P4179  
 Takigiku, K., P2385  
 Takitsume, A., P4078
- Takiuti, M.E., P3158  
 Takizawa, K., P1548  
 Takuwa, Y., P4477  
 Talajic, M., P805  
 Talerico, A., P794  
 Talha, S., P1676, P3392  
 Talini, E., P1606, P4931  
 Talsma, M., P1573  
 Tam, J., P3816  
 Tam, J.W., P2994  
 Tam, S., P1482, P3153, 4968  
 Tamagusuku, H., P4096, P4097  
 Tamaki, N., P4583  
 Tamaki, Y., P532  
 Tamarelle, S., P4492  
 Tamargo, J., P579  
 Tamborero, D., P1617, P3337, P5636  
 Tamburino, C., P685, P1510, P1549, P2066, P4033, P4722, P4723  
 Tamer, G.S., P418, P1369  
 Tamir Bental, T.B., P1550  
 Tammer, F.D.B., P3389  
 Tamura, A., P1460  
 Tamura, Y., P4005  
 Tan, H.C., P627, P4724, P5388  
 Tan, H.L., P3310, P3311, P4156  
 Tan, J.L., P447  
 Tan, L., P3954  
 Tan, L.B., P4521, P5361  
 Tan, L.K., P2177  
 Tan, P.H., P1365  
 Tan, S.K., P4539  
 Tan, S.Y., P1365, P5427  
 Tan, Y.T., 166, P1714, P3346, P4891, P4901  
 Tanabe, M., P3352  
 Tanabe, T., P4180, P4495  
 Tanaka, A., P469, P1278, P1288, P1304, 3561, 3566, P4052, P4467, P4472  
 Tanaka, H., 400, P668, P690, P691, P4573, P4747  
 Tanaka, K., P1548  
 Tanaka, N., P688, 3564, P4707, P4747  
 Tanaka, S., P445, P3057  
 Tanaka, T., P1288  
 Tananari, Y., 2007, P2362  
 Tanaseanu, C.M., P2165  
 Tanboga, I.H., P1584, P1600, P1605, P1611, 2770, P5322, P5325  
 Tanck, M.W., 3777  
 Tandler, R., P3794  
 Tang, M., P403, 5212  
 Tanganelli, P., P5347, P5567  
 Tangcharoen, T., P3335  
 Tangelder, M.J.D., P5440  
 Tangirala, R., P4587  
 Tanguay, J.F., P2093, P2131, P4685  
 Tani, S., P4630  
 Tanigawa, J., P3819  
 Tanigawa, K.T., P3812  
 Tanigawa, T., P4547, P4876  
 Taniguchi, E., P3103  
 Taniguchi, H., P759  
 Taniguchi, I., P5479  
 Taniguchi, T., P413  
 Taniguchi, Y., 5129, P5628  
 Tanimoto, T., P469, 900, P1278, P1304, 3561, 3566, P4052, P4472  
 Tanner, F.C., 378, 387, P2107, P3944, P3947, P4593, P5385, P5386, P5418  
 Tanner, H., P3797  
 Tanno, K., P2470, P5437  
 Tanno, M., P1388, P1389, P2476  
 Tanoue, K., 1923  
 Tanrikulu, M.A., P5365  
 Tansuphaswadikul, S., P672, P1467, P4043, P4048, P4049, P4708, P4712, P4713, P4726  
 Tanter, M., P479  
 Tantillo, R., P4644  
 Tantry, U.S., P676, P681, 2678  
 Tapia, C., P3051, P3185  
 Taramasso, M., P4130, P4144, 5156  
 Tarantini, G., P3173  
 Tarantini, L., P4100, P5695  
 Tarantino, F., P4738, P5267  
 Tarasoutchi, F., P4091
- Tarasov, K., P5414  
 Taraszkievicz, D., P1463  
 Tarawneh, H., P5253  
 Tardif, J.-C., P546, P2499  
 Tardif, J.C., P1397  
 Tardy, D., P1574  
 Tarka, E.A., P1742  
 Tarone, G., P4639  
 Tartuferi, L., P1263, P1694, P3259, 5230  
 Tarzia, P., P4001  
 Tassan-Mangina, S., P1341  
 Tassani-Prelli, P., P4126  
 Tatani, S., P4794  
 Tatar, C., P4170  
 Tataschiere, A., P654, P1478, P2231, P3175, P4050, P4937  
 Tatsis, H., P625, P2536  
 Tatsis, I., P4697  
 Tatsumi, K., P5605, P5650  
 Tatsuno, J., P5310  
 Tatu-Chitoiu, G., P2092  
 Taubert, D., 2682  
 Tavakkoli Hosseini, M., P2070  
 Tavares Aguiar, C.M., P5450, P5463  
 Tavazzi, L., 134, P412, 981, 1104, P1660, P2493, P2495, P2518, P4204, P4206, 5085, P5680  
 Tavella, D., P1354, P3034  
 Taxiarchou, E., P1443, P2535, P3146, P3990, P3993, P4922, P4928, P4940  
 Tay, E., P2386, P4724, 5180  
 Tay, E.L.W., P4803  
 Taylor, A., 977, P5639  
 Taylor, A.J., P5585  
 Tayyareci, Y., P2303, 2860, P3334, 3638, P3909, P3910, P4090, P4635  
 Tayyebi, P., P2417  
 Tazawa, S., P2385  
 Tchaikovski, V., 5133  
 Tchatchum, F., 255  
 Teal, E., 3654  
 Tearney, G.J., P4077  
 Tebbe, U., 3651, P4157  
 Tecelao, S.R., P5632  
 Tedeschi, V., 2866  
 Tedesco, C.C., P3160  
 Tedgui, A., 5109  
 Tedrow, U., 5097  
 Teerlink, J.R., 1101, P2486, P2489, P2512, 2763, P4252, 5049, P5658  
 Tegtbur, U., P4269  
 Tei, C., P633  
 Teichman, S., P2489, 2763  
 Teichman, S.L., 1101, P2486, P4252, P5658  
 Teiger, E., P2112, P2134, P2967, P2977, P4729  
 Teijeira Fernandez, E., P1400  
 Teijink, J.A.W., P3164  
 Teis, A., P4219  
 Teisner, A., 287  
 Teisner, B., 287  
 Teixeira, M., P3024, P4915  
 Teixeira, R., P426, P428, P439, P711, P2973, P2974, P3000, P3827, P3832, P4225, P4537, P4904, 5185  
 Teixido, G., P504, P731, 1007, 1010, P5355  
 Teixido Tura, G., P4089  
 Teixidor, G.T., 1008  
 Tejera, E., P5353  
 Tejero, I., 2000  
 Tejero, M.A., P4801  
 Tek, M., P1723  
 Tekieli, L., P3914, P4480, P5504, P5506, P5510, P5537  
 Teles, R., P1456, P3227, P5281  
 Telesca, M., P1263  
 Tellis, C., P2228  
 Tello De Meneses, R., P716  
 Temelkova-Kurtschiev, T., P4007  
 Temmerman, F., P4804  
 Templin, C., P2077  
 Temporelli, P., P4835  
 Temporelli, P.L., P580, 981, P2168  
 Ten Berg, J.M., P1311, 2008, 2682, P3214, P4804, P5264, P5312  
 Ten Brinke, E.A., P2179, 3648, P4903

- Ten Cate, F.J., P493, 1210, P2147, P2166, P3243, P3247, P3381, P3902, P4147
- Tendera, M., P434, 1148, 1958, P2315, P3068, P3089, P3845, P3851, P3918, 4948, 4992, P5270, P5271, P5274, P5321
- Tenenbaum, A., P3017, 3545
- Tengiz, I., P418, P1369, P4701
- Tenhunen, O., P1417
- Tentes, I., 898, P3936
- Tentolouris, C., 1023, P1287, P2109, P3917, P3972, P4627, 4984, 5044
- Tentzeris, I., P675
- Teo, K.S., P1349, P1374
- Teo, K.S.L., P5308
- Teo, S.G., P4724
- Teo, W.S., P5427
- Teplitsky, I., P667, P5277
- Teragawa, H., P2216, P3215, P3416, P4583, P5541
- Teragawa, H.T., P3812
- Teramoto, T., P4477, 4953, P5372
- Terasaki, F., P4237
- Terashima, M., P1366, P1505, 3562
- Terashima, Y., P1388
- Terdiman, J.F., P4167
- Terehov, I., P3091, P3097
- Terent, A., 149, P5428, P5429, P5497
- Terentes-Prinzios, D., 162, P453, P466, P473, P638, P1292, P1529, P2209, P2531, P2532, 3536, P3915, P3922, P3937, P4265, P4686, P4702, P4936, P5346, P5533, P5721
- Terkelsen, C.J., P2130, 5146, P5286, P5290
- Termijn, Y., P1508
- Termosov, S., 246, P786
- Ternovoy, S., P4544
- Terracciano, C., 1241
- Terrier De La Chaise, A., P1645
- Terrovitis, J., P861
- Tershakovec, A.M., P2254
- Teruzzi, G., P3184, P5511
- Terzis, I., P5446
- Tesar, D., P3219
- Tesche, C., P4637
- Teske, A.J., 2051, P2140, P3265, P4696, 4975, P5646
- Tesorio, P., P1703
- Tessari, P., P5561
- Testa, L., P3191, P4047, P4710, 5070
- Tetu, L., P1608
- Teurfs, W., P4004, P5431
- Teyssier, J.R., P618
- Tfelt-Hansen, J., P775
- Thakkar, R., P2246, P2287
- Thaman, R., P2365
- Thambo, J.B., P4787
- Thangjam, R., P2285
- Thankappan, K.R., P5449
- Thanopoulos, B.D.T., P2350, P2373, P2378
- Thaulow, E., P4679
- Thawaba, H., P1326, P2991
- Thayssen, P., P650, P3040, P4720
- Thebaut, J.F., P1718, P2521, P3351
- Theilade, J., P775
- Theilmeyer, G., 1244
- Theiss, H.D., 2912, 2915, P3082
- Theizen, T., 2015
- Themistoklakis, S., 3652
- Theobald, K., 3658
- Theodorakis, A., P3330
- Theodoropoulos, P., P3134
- Theodosiadis, G., P867
- Theodosios-Georgilas, A., P4031
- Theoret, J.F., P2093
- Theres, H., P1497
- Therrien, J., P4776
- Theuns, D.A., P2462
- Theuns, D.A.M.J., 5126
- Theurl, M., P2189
- Thibault, B., P805
- Thiele, H., 288, P432, P1339, P1340, P1343, P2068, 2822, P2956, P3823, P4755, 5148, P5295
- Thiele, H.T., 2928
- Thiene, G., 1115, 1209, P1371, P2330, P3233, P3238, P4085, 5234, P5579
- Thierfelder, L., 2818, P3244
- Thiery, J., P4690
- Thijs, L., 163, P542
- Thijs, V., P725, P4804
- Thilaganathan, B., P2384, P5716
- Thioub, S., P2234
- Thom, J., P455, P3953
- Thomaes, T., P615, 4967
- Thomaidi, A., 898, P2488, P4208
- Thomas, D., P2422, 3530, 5127, P5602, P5617, P5654
- Thomas, F., P1442, P5424, P5467
- Thomas, G., P2450, 5216
- Thomas, J.T., P5349
- Thomas, M., 1010, P4135, P5355
- Thomas, M.T., 1008
- Thomas, T.R., P3991
- Thomas-Jean, F., P5444
- Thomopoulos, C., P460, P551, P607, P608, P879, P1443, P1483, P2212, P2224, P2232, P2236, P2283, P2284, P2286, P2529, P2538, 2644, P3146, P3399, P3401, P3404, P3408, P3923, P3931, P4024, P4253, P4266, P4270, P4681, P4946, P5708
- Thomopoulou, S., P694, P1546
- Thorand, B., 132, P4669
- Thorgeirsson, G., P3135, P3144, 3776
- Thorin, E., P546, P1397, P2193, P2499
- Thorin-Trescases, N., P2193
- Thorne, S.A., 5179
- Thorsteinsdottir, U., 3776
- Thorstensen, A., P482, 2049
- Thuairre, C., P2112, P3853, 4989
- Thudt, K., P2437
- Thuesen, L., P650, P671, 2923, P4050, P4714, P4720, 5146, P5286
- Thuillez, C., P2510
- Thum, T., P2214, P4524
- Thuny, F., P4107, P4124
- Tian, J., P4055
- Tibazarwa, K., 341, 2769, P4877
- Tiberghien, P., P3090
- Tichet, J., 2648
- Tidjane, A.M., P4740
- Tieleman, R.G., P623, P3891
- Tielke, S., P2990
- Tiengo, A., P3971
- Tierala, I., P4705
- Tierney, W., 3654
- Tijou, I., P4056
- Tijssen, J.G.P., P1302, P1303, P2938, P3098, P3101, 3569
- Till, J.A., P767
- Tillmanns, H., P455, P463, P550, P558, P560, 889, P1396, P1531, P3953, P4496, P5378
- Tillmanns, H.H., P544, 2914
- Tilsted, H.H., P650, P4720
- Tilvis, R.S., P2275
- Tilz, R., P757, P1644, P4832
- Timasheva, Y., P525
- Timmer, J.R., P5264
- Timmers, L., 2017, 2018, 5227
- Timmis, A., 2671, P3844
- Timmis, A.D., P3142
- Timoteo, A.T., P421, P2939, P2941
- Timour, Q., P1392
- Timour Chah, Q., P4500
- Tinoco Mesquita, E., P3998
- Tintoiu, I., P4652
- Tio, R.A., P1303
- Tiritilli, A., P2517
- Tiroch, K., P644, 2931
- Tiron, C., P3854
- Tirouvanziam, A., 4991
- Tischenko, A., P3816
- Tischer, K.H., P3019
- Tissier, R., P2474, P4494
- Tiyerilli, V., P5371
- Tizon Marcos, H., P3187, P4742, 5073
- Tjonna, A.E., P509, P3802, 4970, P5707
- Toader, D., P1377
- Tobias, M., P3145
- Tobler, D., 5084
- Tocado Unzalu, B., P4792, P4793
- Toccafondi, S., 5184
- Tocchetti, C.G., P5406
- Todaro, D., P697
- Todic, B., P4176
- Todorova, B., P4007
- Todosiychuk, V., P1276
- Toelg, R., P643, 5202
- Toepel, W., 346
- Toepker, M.H., P3013
- Toft, A.D., P5247
- Toggweiler, S., P4615
- Tognoni, G., 134, P412, 987, 1099, 1104, P3131, P4204, P4206, P5680
- Toischer, K., P1691
- Toivonen, L., P571
- Tokes-Fuzesi, M., P1317
- Tokgoz, H.C., P1584, P1600, P1605, P1611, P5322, P5325
- Tokgozoglu, S.L., P1353
- Tokola, H., P1430, P3376
- Tolaro, S., P685, P2066
- Toledano, D., P2316
- Toledano, F., P2306
- Toledano Delgado, F., P2305
- Toli, C., P3330
- Toii, E., P3929
- Tolis, P., P1483, P2236, P2529, P3408, P4023, P4266, P4946
- Tollitt, J., P1494
- Toma, I., P1431
- Toman, O., P2987
- Tomandl, J., P2987
- Tomar, M., P4811
- Tomaru, T., P702
- Tomaschitz, A., P528
- Tomasek, A., P425
- Tomasello, D., P2066
- Tomaske, M., P778, P4161
- Tomasoni, L., P5435
- Tomasov, P., P3240, P3283
- Tomaszewski, A., P2360
- Tomaszewski, M., 983
- Tombesi, M., 987, P3131
- Tomcikova, D., P2987, P4227
- Tominaga, T., P3818
- Tomiyama, H., 170, 1024, P2280, P4011, P4015, P4017, P4671, P5438
- Tomizawa, H., P3989
- Tomizawa, T., P3323
- Tomkiewicz-Pajak, L., 2005, 2009, P4818
- Tomkowski, W., 5230
- Tommasi, R., P654, P2231, P4937
- Tommasino, A., P662
- Tomson, J., P687
- Tona, F., 1003, P2330, P4761, 5234
- Tondo, C., 5217, 5234, P5611
- Tonelli, E., P407
- Toner, J., P3206
- Tonet, J., P3340
- Tonino, P.A.L., P4040, 5190
- Toniolo, M., P835, P4098
- Tonkin, A., P5460
- Tonlorenzi, S., P2199
- Tonnensen, T., P1410
- Tonti, G., P3896
- Topaloglu, S., P3319
- Topchian, I., 2826
- Topilsky, T.Y., P2392
- Topliss, D.J., P5585
- Topor-Madry, R., P5562
- Tops, L.F., P4102
- Topsakal, R., P1536, P2533, P3362
- Toquero, J.T.R., P1666
- Torbicki, A., P1579, P4843, 5183
- Torella, D., 904, 2916, P3060
- Torella, M., 904
- Torfason, B., P3338
- Torgano, G., 151
- Torguson, R., 2681, P5719
- Toriyama, T., P476, P3983, P4667, P4678
- Tornatore, T., 2015
- Tornos, P., P3795, P4111
- Tornos Mas, P., P4089
- Toro, R., P4784

- Torp Pedersen, C., P3130  
 Torp-Pedersen, C., 882, P1439, 1821, P2290, P2299, 2779, 2780, P4684, P4852, 5076, P5442  
 Torp-Pedersen, C.T.P., P3962  
 Torp-Petersen, C., 2781  
 Torre, C., P5641  
 Torre-Amione, G., P5692  
 Torregrossa, G., P2948  
 Torres, F., P3129  
 Torres, M., P3193  
 Torres, M.R.S., P4181  
 Torres Marques, J., P788  
 Torres-Colomer, J., P1449, P5530  
 Torri, V., P3217  
 Tortorella, G., P5695  
 Torzewski, J., P416  
 Toso, E., 168  
 Toste, A., P421, P614, P2939, P2941  
 Toth, K., P1418  
 Toth, P.P., P2246  
 Toto Moukoko, J., 1016  
 Touguinha, C., P802  
 Toumanidis, S., P2534  
 Tousek, P., P2402  
 Tousoulis, D., P449, P452, P466, P524, P536, P551, P607, P634, P647, 1022, 1023, P1287, P1462, P1522, P1682, P2109, P2200, P2212, P2232, P2284, P2311, P2529, P2535, P2536, P2538, 2644, P2955, P3044, P3410, 3559, P3917, P3929, P3931, P3972, P3993, P4064, P4256, P4267, P4612, P4627, P4730, P4922, P4928, P4930, 4998, 5044, 5136, P5298, P5390, P5395, P5417, P5419, P5421, P5550, P5711  
 Toussaint, J.F., 255  
 Toutouza, M., P4692  
 Toutouzas, C., P536, P2109  
 Toutouzas, K., 395, P452, P647, 1022, P1324, P1462, P1522, P2321, P2955, P3204, 3559, P3972, P4064, P4627, P4730, P4928, 4984, P5417  
 Touzery, C., P3847  
 Towae, F., P2998, P4514  
 Townsend, M., P3793  
 Toyoda, S., P4921  
 Trabattoni, D., P1357, P3184, 5071, P5511  
 Trabelsi, I., P2353, P4121  
 Trabulo, M., P5463  
 Tracz, W., 2005, 2009, P2528, 3642, P3881, P3914, P3924, P4480, P4818, P5328, P5504, P5506, P5510, P5537, P5559, P5562  
 Trainini, J.C., P850  
 Tramarin, R., P580, P4835  
 Tramullas, M., P1422, 2920  
 Tran, D.T., P2139  
 Tran, N., P3332  
 Trana, C., 340, P1334, P1527, 3564, P4752, P4753  
 Trana Berza, C., P1535  
 Trani, C., P662, P697  
 Trapero, I., P606  
 Trappe, H.-J., 5221  
 Trappe, H.J., P4197  
 Trappe, H.J.T., P765  
 Trappe, K., P569, 3781  
 Traulle, S., P1628  
 Traupe, T., P3192, P4758  
 Trautner, S., P5290  
 Travlou, A., P5393  
 Trbojevic, B., P4199  
 Treede, H., P4132, 5158  
 Treguer, F., P4492  
 Trehan, A., P2102  
 Trela, B., 4948  
 Trembath, L., P2457  
 Tremoli, E., P3160  
 Trenk, D., 5116  
 Tresukosol, D., P672, P1467, P4043, P4048, P4049, P4708, P4712, P4713, P4726  
 Trevi, G.P., P1330, P4057  
 Trevitt, C., P617, P3988  
 Treyer, V., P2078, P4562  
 Trezl, A., P4836  
 Trianni, G., P5505  
 Triano, J.L., P4051  
 Triantafyllou, K., P3189, P3231  
 Triantafyllidi, H., P2169, P2540, P5348, P5502  
 Triantafyllou, A., P635, P867, P878, P4933  
 Triantafyllou, G., P4612, P4930, 5136, P5421  
 Tribouilloy, C., 337, 2869  
 Tribulova, S., P2205  
 Trieb, T., P1347  
 Trifonova, M., P4108, P5558  
 Trifunovic, D., P3878  
 Triggiani, M., P3001, P4691  
 Triggs, C.M., P2167  
 Trigo, J., P2129  
 Trigueros, C., P3060  
 Trika, C., P2534  
 Trikalinos, N., P551, P625, P2535, P4258, P4922  
 Trikas, A., P1682, P2536  
 Triki, F., P2353  
 Trillo Nouche, R., P441  
 Trimarco, B., 1019, 1248, P2191, 2917, P3948, P4890  
 Trimarco, V., 1019, 1248, P4890  
 Trimpert, C., P4248, P4888  
 Trincherio, R., P5571  
 Trineji, M., P1305  
 Trinh, A., P3353  
 Trinkmann, F., P3364, 3641  
 Trip, M.D., P2244  
 Tripathi, S., P3245  
 Triposkiadis, F., P2144, P2513, P4222  
 Tritarelli, A., 1155, P1314  
 Tritto, I., P4526, P4688  
 Tritto, M., 5101  
 Trivedi, H., P1736  
 Trivedi, T.M., P1742  
 Trivilou, P., P2169, P2540, P5502  
 Trivisonno, A., P4072, 5211  
 Troger, B., P4706  
 Troidl, C., P843, P1406, P1545, P2205, P2206, P3371  
 Troidl, K., P1545, P2205, P2206  
 Trombetta, I.C., P1436, P2263, P4025  
 Tron, C., P5260, P5261, P5262  
 Tronconi, F., 1899  
 Troncoso, J.C., P4621  
 Troost, E., P4805  
 Troseid, M., P2288  
 Troubil, M., P3879  
 Troughton, R.W., P541  
 Troupis, J.M., 1261  
 Truschnig-Wilders, M., P3347  
 Trusz-Gluza, M., P442, P1661, P2315, P2425, P2458, P4834, P5273, P5287, P5321  
 Trzos, E., P3064  
 Tsagoulis, N., P5664  
 Tsai, L.-M., P3883, P5374  
 Tsai, W.-C., P3883  
 Tsakalis, F., P5666  
 Tsakiridis, K., P5637  
 Tsaknakis, T., P2513  
 Tsakountakis, N., P5725  
 Tsarouchas, K., 5145, P5297  
 Tsatsopoulou, A., P1698, P3242, P5396  
 Tschierschke, R., P2308  
 Tschoepe, C., 1123, P1699  
 Tschoepe, D., P2997  
 Tschope, C., P4903  
 Tse, H.F., P478, P800, P808, 1250, P1335, P1336, P1482, P3153, P3339, P4556, P4565, 4968  
 Tsekoura, D., P453, P3922  
 Tselepis, A., P1315, P1319, P2228  
 Tselepis, A.D., P2103  
 Tseliou, E., P861  
 Tseng, P.H., 5086  
 Tseng, S.-Y., P2195  
 Tsiachris, D., 164, 386, P449, P625, P869, P879, P1443, P2224, P2284, P2535, P2536, P2538, 2644, P3146, P3410, 3536, P3915, P3990, P3993, P4023, P4258, P4267, P4270, P4922, P4940, P5298, P5419, P5533, P5587, P5711  
 Tsiamis, E., 395, P452, P607, P647, P1324, P1462, P1522, P2321, P2955, P3204, 3559, P3929, P3931, P3993, P4064, P4217, P4627, P4730, P4940, 4984  
 Tsiaousis, G., P2962, P2986, P4031, P4218  
 Tsiapras, D., 2868, P4900  
 Tsiatas, M., 5044  
 Tsigas, G., P1663  
 Tsikaris, V., P2103  
 Tsimikas, S., 393  
 Tsimiklis, G., P505, P5529, P5713  
 Tsimplis, C., P5666  
 Tsintzos, S., P755  
 Tsiodras, S., P2241  
 Tsiotra, P., P3106  
 Tsioufis, C., 164, 386, P551, P607, P625, P869, P879, P1324, P1443, P1462, P1483, P1522, P2212, P2224, P2232, P2236, P2284, P2286, P2321, P2529, P2535, P2536, P2538, P2539, 2644, P2955, P3146, P3400, P3408, P3410, 3559, P3923, P3931, P3972, P3990, P3993, P4023, P4253, P4256, P4258, P4266, P4267, P4270, P4682, P4730, P4922, P4928, P4940, P4946, 4998, P5419, P5708  
 Tsioufis, K., P5711  
 Tsiouris, A., P2070  
 Tsiroidis, E., P4765  
 Tsirogianni, A.K., P5576  
 Tsiotlakis, C., P1663, P2169, P5251, P5348  
 Tso, W.K., 1250, P1335, P1336  
 Tsokanis, A., P453, P3922, P3973  
 Tsokanis, T., P1446, P2265  
 Tsortalis, I.K., 240, 241, P4220  
 Tsoukala, C., P3401  
 Tsubakihara, Y., 5000  
 Tsuboi, H., P692  
 Tsuchida, K., P2100  
 Tsuchikane, E., P688, P1366, P1505, 2925, 3562  
 Tsuchiya, K., P4177  
 Tsuchiya, T., 4986  
 Tsujimoto, A., P5515  
 Tsujino, T., P1421  
 Tsujioaka, H., P469, P1304  
 Tsukahara, R., P3197  
 Tsurumi, M., P733  
 Tsutamoto, T., P814, P4262  
 Tsutsui, J.M., P4748, P5480  
 Tsutsui, K., P3303  
 Tsuzuki, M., P3108  
 Tuan, J., P2427, P4824  
 Tuan, J.H., P5612, P5619  
 Tubaro, M., P434, 1148, 1958, P3836, P3839, P3845, P5270, P5274  
 Tuchscheerer, N., P1385  
 Tudor, I., P4899  
 Tuebler, T., P4132, P5489, P5507, P5518  
 Tuerk, S., P472, P539  
 Tugcu, A., P2303, 2860, P3334, 3638, P3909, P3910, P4090, P4635  
 Tuktarova, I.A., P525  
 Tuleta, I., P4592  
 Tulner, S.A., 3648  
 Tulumen, E., P1353  
 Tulunay Kaya, C., P2225  
 Tumasyan, L.R., P2498, P4242, P4842  
 Tumova, J., P425  
 Tunaoglu, F.S., P2382  
 Tuncer, C., P4192  
 Tunon Fernandez, J., P3263  
 Tunstall-Pedoe, H., P5457  
 Tunyan, L.G., P3329  
 Tuppin, P., P1496  
 Turan, C.H., P547  
 Turan, R.G., P547  
 Turan Bozkaya, Y.T.B., P581  
 Turco, P., 5217  
 Turer, A., P3182  
 Turgeman, Y., P3853  
 Turhan, S., P2225  
 Turi, Z.G., 3653  
 Turiel, M., P5435  
 Turin, T., P5683  
 Turk, E., P514  
 Turk, U., P1369  
 Turk, U.O., P418, P4701  
 Turkie, W., P616  
 Turkkan, C., P3182  
 Turkmani, M., P4741

- Turkmen, C., 3568  
 Turkyilmaz, E., P1600, P1605, P1611  
 Turner, E.L., P582, P594  
 Turner, M., P2365  
 Turner, M.S., P604, 2004, P3793  
 Turov, A., P779, P1623, P1626, P1627, P1632, P1636, 5215  
 Turpeinen, A., 3644  
 Turpie, A.G., 1954  
 Turpie, D.F.S., P3911  
 Turri, D., P3926  
 Turri, R., P5579  
 Tursheva, M.E., P836  
 Turska-Kmiec, A., P1433, P4783, P5590  
 Turski, M., P2458  
 Tuseth, V., 293, P3811  
 Tutihashi, E., P2256  
 Tuxen, C., P5663  
 Tuzun, N., P418, P1369, P4701  
 Tveit, A., P3333, P4848, P4864  
 Twerenbold, R., P4240, 4985, 5078  
 Tybjærg-Hansen, A., 2019  
 Tykarski, A., 983  
 Tyldum, G.A., P3802, P5707  
 Tyomkin, V., P5360  
 Tyrovolas, S., 3539  
 Tzamour, V., 164, P867, P2212, P2224, P2236, P2286, P2527, P2536, P2539, P3400, P3410, P3923, P4256, P4267, P5419  
 Tzanalaridou, E., P4044  
 Tzang, O., P1507, P4068  
 Tzeis, S., P4845, 5100  
 Tziakas, D., P3936  
 Tziakas, D.N., 898, P2488, P4208  
 Tziallas, D., P4013  
 Tzifa, A., 5180  
 Tziouvas, A.R., P1471  
 Tzivoni, D., P3841  
 Tzortzis, S., P2169, P2220, P2540, 5144, P5348, P5502  
 Tzourio, C., 133, P624  
 Tzvetkov, B.T., P2111  
  
 Uchida, Y., P702  
 Uchikawa, T., P626  
 Uchiyama, T., P437  
 Udayachalerm, W., P672, P1467, P4043, P4048, P4049, P4708, P4712, P4713, P4726  
 Uddin, M.M., P3202  
 Udeanu, M., P2092  
 Udink Ten Cate, F., P3320  
 Ueda, M., 394  
 Ueda, T., P4078  
 Ueda, Y., P4060  
 Uehara, K., P4517  
 Uejima, T., P480  
 Uekita, H., P4477  
 Ueland, P.M., P1274  
 Ueland, T., 1100, P1295, P5501  
 Uemura, K., 3640  
 Ueno, K., P3183, P4499, 5143  
 Ueno, S., P3074  
 Ueshima, H., P5683  
 Ueshima, K., P3805  
 Uesugi, M., P692  
 Ueyama, K., P4517  
 Ueyama, N., P4707  
 Ugo, F., P3016  
 Ukimura, A., 5229  
 Uldry, L., P4873  
 Ulimoen, S., P4864  
 Ulimoen, S.R., P3333  
 Ullrich, H., P4833  
 Ulman, J., P3905  
 Ulmer, H., P4626, P4662, P5470  
 Ulrich, C., P4631  
 Umana, J.P., 5245  
 Umans, V.A., 401, P2440, P3006, P3053, P3817  
 Umar, S., P3059  
 Umemoto, S., P3374, P4476  
 Umman, B., 3568  
 Umman, S., 3568  
 Unalir, A., P1723  
 Unbehaun, A., P4133  
  
 Undas, A., P1320, P2313, P3179, P5303, P5537, P5559, P5562  
 Underwood, S.R., P831  
 Unemori, E., P2489, 2763, P4252  
 Unger, G., P675  
 Unger, P., 5169  
 Ungi, I., P5283  
 Unimori, E., P5658  
 Uno, K., P759, P3867  
 Unsoeld, B., P1415, P4497  
 Unsoeld, B.W., 291  
 Unsold, B., P4639  
 Untersee, T., P4735  
 Unzek, S., P3826, P5488, P5491  
 Unzue, L., P2357  
 Urakawa, T., P5519  
 Ural, D., P1290, P4193, P4264, P5598  
 Ural, E., P1290, P4193, P5598  
 Urazovskaya, I., P2985  
 Urban, M.W., P481  
 Urban, P., P3824  
 Urbanczyk-Swic, D., P1661, P2458  
 Urbane, P., P4163  
 Urbanik, A., P683  
 Urbinati, S., 981, P3838  
 Uren, N., P4675, P5317  
 Urheim, S., P498  
 Uribe, M.D., P4181  
 Urrutia, A., P1721, P3167, P4219, P4231  
 Urrutia, L., P1724  
 Urselli, R., P3893  
 Urso, R., P4000, 5085  
 Urtz, M., P1647  
 Urushida, T., P3220  
 Usandizaga, E., P566  
 Ushakov, A., P1432  
 Ushikoshi, H., P2478, P2483, P4572, P5515  
 Usinger, L., P3800  
 Uslu, I., P1723  
 Uslu, N., P2225  
 Uslu, O., P544  
 Usovich-Szarynska, M., P5712  
 Ussia, G., P2346  
 Ustaoglu, M.A., P3357  
 Usui, Y., 400, 1024, P4011, P4573  
 Utchil, S.I., P3212  
 Utsunomiya, Y., P413  
 Utz, W., 2818  
 Uusaro, A., 3644  
 Uyarel, H., P3182, P3195  
 Uzan, L., P601  
  
 Vaag, A., 1821  
 Vaananen, H., P571  
 Vaartjes, I., P4221  
 Vacca, A., P4743  
 Vaccari, A., P3001  
 Vachieri, J.L., P727  
 Vaclavik, J., 3649  
 Vagenakis, G., P2138  
 Vagheti, M., P4628  
 Vagnarelli, F., P423, P424, P3858  
 Vahanian, A., 2006, P2413, P4099, P4131, P4807, 5155  
 Vahdat, B., P5301  
 Vahtera, J., P5441  
 Vaile, J.C., P5461  
 Vaillancourt, L., P805  
 Vaillant, F., P1392, P1397  
 Vaillant, F.V., P4500  
 Vaina, S., P2364, P3898, P3921, P5417  
 Vainer, J., P4136, P4528  
 Vaisse, B., 1950  
 Vait, E., 234  
 Vaknin-Assa, H., P667, P5277  
 Val-Mejias, J., 2774  
 Valaora, A., P2268  
 Valatsou, A., P2200  
 Valdes, M., P657, 1211, P1318, P2525, 2778, P3266, P4858  
 Valduga, C.J., P5720  
 Valencia, J., P657, P2438  
 Valencia, O., P2070, P2072  
 Valencia-Martin, J., P4858  
  
 Valenta, I., 396, 399, P2078, P3033, P4562  
 Valenti, R., P665, P3023, 4950  
 Valenti, V., 1253, P3360  
 Valentin, J.P., P575  
 Valentini, G., P5343  
 Valentini, M., P5694  
 Valeri, G., P2080  
 Valerio, C., P1596  
 Valerio, C.J., P1575  
 Valeur, N., 5076  
 Valfre, C., P2409  
 Valfre, C., P4109, P4123  
 Valgimigli, M., P4072, P4705  
 Valic, Z., P2223  
 Valina, C.M., 5116  
 Valizadeh Moejezi, R., P4170  
 Vaik, S.D.A., 5204  
 Valla, M., P3314  
 Vallaster, M., 2912, 2915, P3082  
 Valle, A., P4540, 5080  
 Valle, R., P4223  
 Valle, V., P1721, P4219, P4231  
 Valleggi, A., P1680, 2767  
 Vallejos, J.A., P3037  
 Valls-Bertaut, V., P4840  
 Valsangiaco Buechel, E., P5555  
 Valsecchi, O., 1001, P4072, 5211  
 Valsecchi, S., 1899  
 Valtuille, L., 1912  
 Valvano, A., P2240  
 Valverde, V., 343  
 Valzania, C., P2079, P5618  
 Vamvakou, G., P1487  
 Van 'T Hof, A.W.J., P1311, P1448, P3213, P3214, 5006, P5264, P5291  
 Van Albada, M.E., P1595  
 Van Belle, E., P1568, P2204  
 Van Belle, Y., P4821  
 Van Bommel, M.W., P2441  
 Van Besouw, J.P., P2072  
 Van Beusekom, H.M., 2930  
 Van Beusekom, H.M.M., P3205, P3209, P3210, P3211, P3968  
 Van Bommel, R.J., P5642  
 Van Bommel, R.J., P1653, P1705, 1911, P2157, P4102, P4546, 5094, 5125, P5633  
 Van Boven, A.J., 4992  
 Van Bracht, M.V.B., P765  
 Van Bragt, K., 3779  
 Van Casteren, L., P483  
 Van Craenenbroeck, E., 4960, 4965  
 Van Daal, G.J., 5174  
 Van Dalen, B.M., P493, P2147, P2166, P3381, P3902  
 Van Dam, T.B., 5012  
 Van De Borne, P., P727, P874, P1437, P3956  
 Van De Borne, P.H., 1016, P3147  
 Van De Bruene, A., P4805  
 Van De Sande, M., 5204  
 Van De Sandt, F., P3817  
 Van De Veire, N., P857, P5633  
 Van De Veire, N.R., P2186  
 Van De Vosse, F.N., P3009  
 Van De Wef, F., 1253  
 Van De Weg, S.M.W., P3105  
 Van De Werf, C., P4156  
 Van De Werf, F., 888  
 Van De Wetering, H., 5006  
 Van Deer Meer, R.W., P2186  
 Van Den Akker, F., 1956  
 Van Den Berg, N., P4073  
 Van Den Borne, P., 381  
 Van Den Branden, B., 2008  
 Van Den Ent, M., 1252  
 Van Den Heuvel, M., P3205, P3210, P3968  
 Van Den Meiracker, A.H., 2003  
 Van Den Toorn, L.M., 5174  
 Van Der Bom, J.G., P1653, P3224  
 Van Der Ende, J., 5012  
 Van Der Ent, M., P2338, 5012, 5204  
 Van Der Geest, R.J., 1118, P4546  
 Van Der Giessen, A.G., P3009, P3013, 4983  
 Van Der Giessen, W.J., 2930, P3101, P3205,



- P3209, P3210, P3211, P3968, P4035, P4075, 4949  
 Van Der Graaf, L.M., P573  
 Van Der Harst, P., 2765, P4875  
 Van Der Heide, E., P4073  
 Van Der Hoeven, B.L., P1506, P3224, P4082, 4956  
 Van Der Horst, M.B., P1603  
 Van Der Hulst, F.F., P3294  
 Van Der Kley, F., P4102  
 Van Der Kraak, P., 381  
 Van Der Laan, A.M., P2187, P3098, P3101  
 Van Der Laarse, A., P572, P3059, P3099  
 Van Der Loos, C.M., P1302  
 Van Der Lugt, A., P4625  
 Van Der Nagel, R., P2421  
 Van Der Niepen, P., P871  
 Van Der Putten, K., P5656  
 Van Der Putten, N.H.J.J., 5012  
 Van Der Smagt, J., P3243  
 Van Der Steen, A.F.W., P3009, P4625  
 Van Der Veire, N.R.L., 2054  
 Van Der Velde, E.E., P4767  
 Van Der Velde, E.T., P1653, 1911  
 Van Der Vleuten, P.A., P1303, P3101  
 Van Der Vlugt, M.J., P2163, P3031  
 Van Der Wal, A.C., P1302, P4632  
 Van Der Wall, E., P3059  
 Van Der Wall, E.E., P721, P857, P1351, P1382, P1451, P1453, P1506, P1521, P1653, 1911, 2054, P2075, P2156, P2242, P3011, 3648, P3866, P3873, P3876, P4082, P4622, P4654, P4791, P4903, 4987, 5088, 5094  
 Van Der Weg, K., P2981  
 Van Der Zant, F., 401  
 Van Der Zwaan, H.B., P3381, 5171  
 Van Dijk, A.P.J., P2163, P4782, P4789  
 Van Dijk, J., P495  
 Van Domburg, R., P2100, P3122, P3162, P3169, P3857, P4030  
 Van Domburg, R.T., 157, P639, P1445, P2243, P2338, P2462, P2966, P3159, P3978, 4947, 4949, 5204, P5252, P5524, P5525, P5526  
 Van Duijn, C., 4995  
 Van Eickels, M., 2779, 2781  
 Van Engen-Verheul, M.M., P587  
 Van Erven, L., P1653, 1911, P2467, P3296  
 Van Es, G.A., P696, P1735  
 Van Esch, J.H.M., P5544  
 Van Ettinger, M.J.B., 5012  
 Van Gaal, W.J., 5070  
 Van Gelder, I.C., 235, P2432, P4185, P4767, P5607, P5614  
 Van Genne, L., 2921, P3413  
 Van Gent, M.W.F., P725, P737  
 Van Gestel, Y., P2170, P2509, P3978  
 Van Gestel, Y.R.B.M., 157, 887, 1009, P1445, P1706, P2243, P2341, P4633, 5061, P5252, P5485, P5513, P5524, P5526  
 Van Geuns, R.J., P4045, P4077, P4129  
 Van Geuns, R.J.M., P660, 1252, P4035  
 Van Gilst, W.H., P742, P854, P1413, 2765, 2921, P3413, P4875, P5466  
 Van Hattum, E.S., P5440  
 Van Herck, J.L., 905, 1256  
 Van Herwaarden, J.A., P3107  
 Van Houwelingen, G., P3214  
 Van Houwelingen, K.G., P1502, P5312  
 Van Hulten, R., P3111  
 Van Kalken, C.K., P3123  
 Van Kuijk, J.P., 887, 1009, P1445, P1706, P2170, P2341, P2509, P3978, P3987, P4633, 4947, 5061, P5252, P5485, P5513  
 Van Langen, I.M., P4156  
 Van Lier, F., P4633, 4947  
 Van Loon, R.L.E., P1573, P1595, P1603  
 Van Noord, P., P3978  
 Van Oort, R.J., P3380  
 Van Pelt, N., P1479  
 Van Praet, F., 340  
 Van Ramshorst, J., 2819  
 Van Rees, J.B., P2467  
 Van Rijen, H.V.M., P2421, P3294  
 Van Rossum, A.C., P495, 1255, P1303, P1344, P3098, P3101, P3389, P5632  
 Van Royen, N., P2187  
 Van Ryn, J., P2110, P2408  
 Van Soest, G., 2930, P4073, P4077  
 Van Staa, T.P., 1798, P3125, P5476  
 Van Tassel, B.W., P812, 1154, P2124, P3367, 5054  
 Van Tienhoven, M., 1210, P3247  
 Van Uum, S., P5451  
 Van Veen, T.A., P2421  
 Van Veen, T.A.B., 5139  
 Van Veldhuisen, D.J., 235, P846, P854, 1102, P1413, P2432, P2493, 2765, 2921, P3154, P3359, P3413, P4185, P4212, P4789, P4875, P4913, P4918, P5607, P5614  
 Van Velzen, J., 4987  
 Van Velzen, J.E., P1351, P1382, P1521, P2075, P4622  
 Van Welsenes, G.H., P1653, 1911, P3296  
 Van Werkhoven, J.M., P1453, P1521, P2075, P2156, P3011, P3018, P3876, P4654  
 Van Werkum, J.W., P1311, 2682, P5264, P5312  
 Van Wijck, F., 1922  
 Van Wijngaarden, J., P4887  
 Van't Hof, A.W.J., P5312  
 Van-Assche, T., P2311  
 Vanderheyden, M., 2762, P3345, P4752, P5676  
 Vanderper, A., P1416  
 Vanella, L., P2475  
 Vanermen, H., 340  
 Vanhanen, H., P5474  
 Vanhees, L., P615, 4967  
 Vanhoenacker, P., P1527  
 Vanni, S., 236, P701, P714, P719, 5184  
 Vano, E.V., 5068  
 Vantler, M., P4595  
 Vanuzzo, D., 981  
 Vanwildemeersch, M., P5389  
 Vanyi, J., P3343  
 Vanzetto, G., P1492  
 Vaquerizo, B., P4051  
 Vaquez, R., 2773  
 Varakis, J., P529, P5397  
 Varandas, J., P2296  
 Varanini, M., P3414  
 Varbaro, A., P1658  
 Vardella, F., P4084  
 Vardas, P.E., P694, P829, P1546, P1547, P1672, P2252, P2257, P2259, 2761, P3049, P3886, P4749, P5725  
 Varejka, P., P522  
 Varela, A.M., P3103  
 Varela-Carver, A., P4744, 5132  
 Varela-Roman, A., P441  
 Varga, A., P513, P2442  
 Vargas, S.L., P1431  
 Varghese, C., P653  
 Varma, A., P812, 1154, P2124, P3367, 5054  
 Varma, C., P1504, 5152  
 Varma, N., P1656, 1909  
 Varnous, S.H., P516  
 Varon, J., P5686  
 Varounis, C., P5251  
 Varro, A., P409  
 Vartdal, T., P5313  
 Vartela, V., 2868  
 Vartiainen, E., 129, P5458  
 Varvaglione, A., P3893  
 Vasic, D., P5369  
 Vasijevic, Z., P5269  
 Vasile, R., 5242  
 Vasilenko, L., P4211  
 Vasilescu, A., 5042  
 Vasiladou, C., P5703  
 Vasilieva, E., P2985  
 Vasijevic, D., P2189  
 Vasijevic, Z., P427, P443, P444, P2126, 5208  
 Vasku, A., P3081  
 Vasques-Novoa, F., P1593  
 Vasquez, G., P3014  
 Vassalli, G., P3067, P3070  
 Vassallo, E., P5540  
 Vassanelli, C., P835, P1300, P1688, P4098, P4806, P5477  
 Vassanelli, F., P1688  
 Vassilev, D.I., P4717  
 Vassileva, A., 1001  
 Vassiliadou, C., P3171, P3405  
 Vatankulu, M.A., P4808  
 Vatasescu, R.G., P5608, P5644  
 Vatinian, S., P1726  
 Vatta, M., P784  
 Vatten, L., P5465  
 Vaturi, M., P2391, P2407  
 Vavetsi, S., P5297  
 Vavouranakis, M., P2364, P3898  
 Vavouranakis, M., P2955, P3044, P3921, P4730, P5417  
 Vaysse, N., 3530  
 Vaz Perez, A., P5655  
 Vaziri Farahani, K.V.F., 1011  
 Vazquez, R., 2778, P4207  
 Vazquez De Prada Tife, J.A., P841  
 Vazquez-Fernandez, S., P4054  
 Vazquez Gonzalez, N., P641, P840, P1499, P1500, P2980, P3186, P5285  
 Vazquez Rodriguez, J.M., P641, P840, P1499, P1500, P2980, P3186, P5285  
 Veasey, R.A., 248, 250  
 Vecchi, G., P1549, P723  
 Vecchio, S., P699  
 Vecchione, F., P751  
 Vecoli, C., P2475  
 Vedovati, M.C., 5186  
 Veenhuysen, G., P2471  
 Vega, S., P5454  
 Vegas, J.M., P3185  
 Vegas Valle, J.M., P3129  
 Vegh, E., P3309  
 Vegh, E.M., P5626  
 Veglia, F., P3160  
 Veira, E., P3253  
 Veiser, T., P3905  
 Vejilstrup, N.G., P4795, P4797  
 Velasquez, M.D., P4181  
 Velazquez, M.T., P2357  
 Velazquez, T., P718, P723, P4557  
 Veldhuijzen, M.G.G., 5012  
 Velkoska, E., P3382  
 Vella, V., P5246  
 Vellenga, E., P4875  
 Velon, A., P774, 1825, P5496  
 Velthuis, B.K., P599, 2051, P3265, P4696, 4975, 4976, P5656  
 Veltmann, C., P1664, P1669, P3289, P3293, 5120, 5123  
 Venancio, A., P2447  
 Venegoni, L., P1542  
 Venge, P., 286  
 Venneri, L., P4788, P5249  
 Ventura, C., P4508  
 Ventura, R., P5634  
 Ventura-Clapier, R., P2328  
 Venugopal, P., P3086  
 Venugopal, V., 3647  
 Ver Lee, P.N., P4040  
 Verardo, R., P1265, P3271  
 Verbal, F., P435  
 Vercellino, M., P4516, P4616  
 Verdecchia, P., P5292  
 Vereb, M., P868  
 Vereckei, A., P5615  
 Vered, Z., P5360  
 Vergara, P., P2431, P2455  
 Vergaro, G., P822, P1680, 2767, P4553, P5368  
 Vergely, C., P618  
 Vergez-Larroquet, C., 1112  
 Vergopoulos, E., P5298  
 Verhaert, D., 397  
 Verhagen, H.J.M., 157, 887, P2243, P2966, P3047, P3159, P3978, P3987, P5252, P5524, P5525, P5526  
 Verhamme, K., 5117  
 Verheule, S., 3779  
 Verma, A., 240, 3652, P5414  
 Verma, S., P2217  
 Vermeersch, P.H.M.J., P4034  
 Vermes, E., P4251  
 Vermeulen, K., P1342  
 Verschuren, W.M.M., P3113

- Versteeg, H., P3169  
 Versteegh, M.I.M., P4102  
 Versteylen, M., P1375, P3012  
 Verstrecken, S., 2762, P3345  
 Verstuyft, C., 5109  
 Vertesich, M., P2158  
 Verwey, H.F., 3648  
 Veryovkin, E., P2543  
 Veselka, J., P3219, P3240, P3283  
 Vesin, J.-M., P4873  
 Vesin, J.M., P3043, P4865  
 Vesterlund, T., 1902  
 Vestri, A., P1325  
 Vestri, A.R., P3862  
 Vetter, M., P416  
 Vezali, E., P869, P1443, P4270  
 Viallet, C., P4251  
 Viana, A., P4786, P4790  
 Viana-Tejedor, A., 289  
 Vianello, A., P5567  
 Viard, P., P2517  
 Viarengo, G., 5138  
 Vicaut, E., P3336, P3852  
 Vicedomini, G., P2431, P2455  
 Vicente, V., P1318, 1953  
 Vicente Steijn, R., P573  
 Vicentini, A., 1903, P5641  
 Vicenzi, N., P621  
 Vicinanza, C., 904, 2916  
 Vicol, C., P4566  
 Vicol, M., P4652  
 Vidaic, J., P2139  
 Vidal, B., P3337, P5608  
 Vidal Perez, R.C., P1449, P5530  
 Videbaek, J., P4770, P4774  
 Vieillard-Baron, A., 5074  
 Vieira, M.L.C., P4748, P5699  
 Vieira, R.D., P534, P538, P2069, P2071, P2318, P3158, 5189, 5191, P5480  
 Vieira Filho, N.G., P4172  
 Viel, E., P1263, P1694, P3259, 5230  
 Viganò, M., P712  
 Vigili De Kreutzenberg, S., P3971  
 Vigliano, C.A., P4621  
 Vignalou, J.B., P5276  
 Vigneau-Vinsonneau, A., 1112, P4840  
 Vignolles, N., P431, P1301, P2083  
 Vigorito, C., P2496  
 Viigimaa, M., 1017  
 Viitasalo, M., P571  
 Vijaya, P., P5522  
 Vijayaraghavan, R., P3084  
 Vikenes, K., P4523, P4527  
 Vikentyev, V.V., P4010  
 Vikman, S., P682, P2438  
 Vikstrom, M., 3770  
 Viktorsson, T., 978  
 Vila, J., P632, P2298, P4094  
 Vilacosta, I., P3795, P4113, P4114, P4115, P4117, P4120  
 Vilahur, G., 892, 1152, P2113, P3112  
 Vilard, E.R.I.C., 5200  
 Vilas Boas, F., 5079  
 Vilas-Boas, F., P3822, P4926, P5688  
 Vilchez, J.A., P3266  
 Villa, A., P585  
 Villa, M., 5071  
 Villadsen, A., P4720  
 Villain, E., P570, P5551  
 Villani, C., P3236  
 Villanueva-Benito, I., P4054  
 Villar, A.V., P1422, 2920  
 Villard, E., 2918, P3058  
 Villari, B., P1711  
 Villasmil, J., P598, P2541  
 Villasmil, J.J., P5439  
 Ville, N., P601  
 Villemot, J.P., P2329  
 Villena, M., 389  
 Villevalde, S., P5715  
 Villuendas, R., P1721, P4219  
 Vimercati, M., P1658  
 Vincent-Martin, M., P5316  
 Vincentelli, A., P5564  
 Vinereanu, D., 335, P507, P3354  
 Vinhas, H., P2403  
 Vink, A., 381, P3104, P3107, P5387  
 Vinsonneau, U., 1112, P4840  
 Vinue, A., 377  
 Viola, G., P3337  
 Violini, R., P3177, P4705  
 Virag, N., P4873  
 Virkamaki, A., P3388  
 Virmani, R., 393, P1512, P4632  
 Vis, J.C., P4802, 5174  
 Vis, M.M., P2938, 3569  
 Viscardi, F., P4806  
 Visentin, P., 160  
 Viskin, S., 1117  
 Visseren, F.L.J., P2244  
 Vitale, C., 4962  
 Vitale, G., P2272  
 Vitovec, J., P4227  
 Vitovec, M., P720  
 Vitovsky, R., P5581  
 Vittorini, S., P5547  
 Vitulano, N., P3260  
 Vivas Balcones, D., P492  
 Viviani, G., P701, P714, P719, 5184  
 Viviani, B., P3809, P3810  
 Vizzardi, E., P4100  
 Vizzi, V., P4703  
 Vizzini, L., 885, P3168  
 Vlachopoulos, C., 162, P449, P453, P466, P473, P634, P638, 1020, P1292, P1529, P2185, P2209, P2527, P2531, P2532, P3171, P3405, 3536, 3542, P3915, P3919, P3922, P3937, P3973, P4265, P4686, P4702, P4935, P4936, P5346, P5533, P5550, P5711, P5721  
 Vladimirova-Kitova, L., P4007  
 Vlahakos, D., P2230  
 Vlasinova, J., P793  
 Viasseros, I., 164, P2364, P2535, P3898, P3990, P4922  
 Vletter, W.B., P493, P2147, P2166, P3381, P3902  
 Vliegen, H.W., P721, P4782, P4789, P4791, 5174  
 Vock, P., P2437  
 Voehringer, M., P4746, 5087  
 Voelker, W., P2159  
 Voelker, W.V., 2861, P3897, P4105  
 Voelkl, J.G.J., P1390, P1391, P1401, P1402  
 Voeller, H., P4261, P5408, P5724  
 Voelzke, H., P4663  
 Voevoda, M., P3940  
 Vogel, B., 5108  
 Vogel, S., P560  
 Vogiatzi, G., P2200  
 Vogiatzi, K., P694, P1546  
 Vogiatzidis, C., P2986, P3163, P4218  
 Vogiatzoglou, S., P449, P5298  
 Vogt, A., 5072  
 Vogt, C., P3966  
 Vogt, J., P3284, P4820  
 Vogt, P., P3067, P3070, P4164  
 Vogt, W., P1313, 5114  
 Vogtmann, T., P4195  
 Voicu, S., P3813  
 Voicu, V.A., P4652  
 Voigt, A., P4888, P5580  
 Voigt, J.-U., P5330  
 Voigt, J.U., P483, P485, P1607, P2180, P2183  
 Voisine, P., 5237  
 Volders, P.G.A., P575  
 Volger, O.L., P2187  
 Volinkina, V.M., P836  
 Volkova, Y.A., 246  
 Vollenweider, P., P2291  
 Volpe, M., P2207, P3896, 5002, P5714  
 Volpini, M., P3830  
 Volterrani, M., P1678, 4962  
 Voltyrakis, E., P1487  
 Volzke, H., 2675  
 Von Bardeleben, S., P1618  
 Von Beckerath, N., P1313, P1332, 5114  
 Von Bergen, N., P776  
 Von Bibra, H., P588  
 Von Birgelen, C., P1502  
 Von Bodman, G., P4566  
 Von Eckardstein, A., 387  
 Von Elverfeldt, D., P4479  
 Von Haehling, S., 239, 5058  
 Von Hundelshausen, P., P2215  
 Von Lewinski, D., P552, P4531, 5131  
 Von Lilien, A.L., 5180  
 Von Oepen, R., P3206  
 Von Renteln-Kruse, W., P2412  
 Von Roeder, M., P2950  
 Von Scheidt, W., P3277  
 Von Segesser, L.K., P2978  
 Von Zur Muhlen, C., P4479, P5352  
 Vona, M., P2978  
 Vonbank, A., P1464, P2262, P2270, P2279, P2975, P4666  
 Vonbank, K., P717  
 Vonk, M.C., 5174  
 Vonk Noordegraaf, A., P721  
 Voo, S.A., P3111  
 Voon, W.C., 339  
 Voors, A., P4252  
 Voors, A.A., P846, P854, 1101, P1413, P2486, P2489, 2763, 2765, P3359, P4212, P4789, P4875, P4913, P4918, P5466, P5658  
 Voridis, E., P4044  
 Vorobcsuk, A., P1317, P5283  
 Voros, S., P3014  
 Vorpahl, M., P1512  
 Vos, J., P4075  
 Vos, M.A., P562, P2421, P3294, P3312  
 Vosa, C., P2972, P3076, P5517  
 Voss, F., 3781  
 Voss, R., P1531  
 Voss, S., P843, P1406, P1545, P2206, P3371  
 Votteas, V., P460, P3404, P3975, P4024, P4681  
 Voudris, V., P694, P1546, P1700, 2868, P2947, P3251, P4162  
 Vouliotis, A., P1698  
 Vouliotis, A.-I., P4697  
 Voute, M., P2966  
 Vrancks, R., P5573  
 Vranckx, P., 5111  
 Vrettou, H., P4900  
 Vriens, P.W., P3164  
 Vrints, C., P4004, 4960, 4965, P5431  
 Vrints, C.J., 905, 1256, P2949, P5332  
 Vriz, O., P602, P1565, P2184  
 Vrolix, M., P4735  
 Vrtovec, B., P5692  
 Vrublevsky, A., 2871  
 Vujisic-Tesic, B., P2433, P3322, P3878, P4194, P5331  
 Vukcevic, V., 3565  
 Vulic, D., P3116, P5478  
 Vuolteenaho, O., P3376, 5075  
 Vyas, C., P777  
 Vyselaar, J., P5529, P5713  
 Vyselaar, J.R., P505  
 Vyskocilova, P., P5709  
 Vyssoulis, G., P867, 1020, P2185, P2527, P4935, P5711  
 Waagstein, F., P4205, P5679, P5685, P5701  
 Wachtell, K., 159, P863, P866, 1015, P4106, P5570  
 Wachter, M., P2152  
 Wachter, R., 1126, P1585, P2428, P4897, P4905, P4911, P4914, P5670  
 Wachtlin, D., P2238  
 Wackers, F.J., P4574  
 Wada, H., P2487  
 Wada, N., P2405  
 Wadley, J., P2545  
 Waeber, G., P2291  
 Waehre, A., P1674  
 Waessnig, N., P4178  
 Wagatsuma, K., P1520, P4065  
 Wage, R., P1262, P2388, 4973  
 Wagenaar, G., P3059  
 Wagener, F.A.D.T.G., P1595  
 Wagenmakers, A., P1459, P4471, P4883  
 Wagner, A., 884, 1255, 2650, 3540, 3541, P4657  
 Wagner, G.S., P5422  
 Wagner, K., P1701  
 Wagner, O., P2101, P3004

- Wagner, R., P3050  
 Wagner, S., 903  
 Wahba, A., P3391  
 Wahbi, K., P3276  
 Wahl, A., P2164, P2349, P4777  
 Wahlander, K., P4851  
 Waintraub, X., P4494  
 Wait, R., P531, P5381, P5382  
 Waiter, G., P4586  
 Wakamatsu, Y., P4660, P4668  
 Wakasa, M., P4629  
 Wakatsuki, T., P1558, P4538, 4957  
 Wakayama, Y., P4569  
 Waksman, R., 2681, P4074, P5719  
 Walch, J., P4238, P4884  
 Walcher, D., P5369  
 Walczak, F., P1661, P4163, P4772  
 Wald, R., P4763  
 Waldenstrom, A., P2176  
 Waldman, A., P2065  
 Waldman, S.V., P2310, 5244  
 Waldmueller, S., P1269  
 Waldum, B., P4230  
 Walenta, A.H., P1370  
 Walenta, K., P1370, P3102  
 Walinski, H., P4493  
 Walinsky, P., P4733  
 Walker, A., P2180  
 Walker, B.R., P4597  
 Walker, D.M., 249, P3020  
 Walker, K., P5588  
 Walker, P., P5538  
 Walker, P.M., P1373, P3847  
 Wall, C.A.M., P2294  
 Wallen, N.H., P589  
 Wallrapp, C., P3062  
 Wallukat, G., P406, 1208, P1581  
 Walpoth, N., P2414  
 Wals, A., P3053  
 Walsh, C.E., P5407  
 Walsh, K., P783  
 Walsum, T., P3009  
 Waltenberger, J., P605, P2981, P3111, P4528, 5133, P5403  
 Walter, D., P5489  
 Walters, J., 1102  
 Walters, M., 150  
 Walther, C., P2950, 3528, P4690  
 Walther, G., P3092  
 Walther, S., 1242  
 Walther, T., 1012, P2068  
 Walther, T.W., 2928  
 Walton, S., P4586  
 Walz, F., P4178  
 Wang, A., P745, P1580, P3132  
 Wang, B., P1687, P5639  
 Wang, B.W., P3379  
 Wang, D., 152  
 Wang, F., P3148, P3954  
 Wang, G.G., P5596  
 Wang, H., P2258, 2933  
 Wang, H.C., P454  
 Wang, H.L., P3148  
 Wang, H.S., P2091, 2673, 3558, P4648, P4651  
 Wang, J., P2190, P4607  
 Wang, J.-K., P2367  
 Wang, J.H., P3148  
 Wang, J.K., P3149  
 Wang, L., P3095  
 Wang, L.F., P4081  
 Wang, L.Y., P3137  
 Wang, M., P478, P800, P808, P4672  
 Wang, S., P3328  
 Wang, S.H., P2523  
 Wang, S.L., P4556, P4565  
 Wang, S.S., P703  
 Wang, T., P1570  
 Wang, W., P3295  
 Wang, X., P1534, P5305  
 Wang, X.J., P1730  
 Wang, Y., P2258, P2371  
 Wang, Y.-G., P5356  
 Wang, Z., P1683, P3954  
 Wang, Z.J., P651  
 Wanitschek, M., P4626  
 Wanner, C., P2159, 2782  
 Ward, J.A., P4249  
 Ward, M., P813, P3804  
 Ward, M.R., P3084  
 Ward, N., P783  
 Wardell, E., P3071, P5556  
 Waring, C., P3060  
 Warita, S., P3904  
 Warmuth, M., P768, P3026  
 Warnecke, H., P5339  
 Warnholtz, A., P2238  
 Warnock, D., P3288  
 Warnock, D.G., P3249  
 Warodomwicht, D., P4655  
 Was, T., P659, P2133, P3143  
 Wasek, W., P5521  
 Washio, T., P4630  
 Wasler, A., 5131  
 Wasmer, K., P4833  
 Wasserman, K., P1588  
 Wassmann, K., P5371  
 Wassmann, S., P4600, P5371  
 Wassmann, S.Z., P5402  
 Wassmuth, R., 2020  
 Watabe, H., P3036  
 Watanabe, H., P3323  
 Watanabe, K., P3818  
 Watanabe, M., P4754  
 Watanabe, N., P2405, P3869  
 Watanabe, S., P1331, P1582, P2251, P3036, P3904, P4014  
 Watanabe, T., P1460, P3904  
 Waterworth, C., 5057  
 Watkins, H., P1561, P3246, P3965  
 Watkins, S., 1254, P4751  
 Watson, C., 5047  
 Watson, T., P3339  
 Wauters, K., P4174, P4182, P4827  
 Wautrecht, J.C., P5539  
 Wcislo, T., 125, P2506  
 Weatherley, B., 2763  
 Weatherley, B.D., 1101, P2486, P2489  
 Weaver, R., P1459, P4471, P4883, P4885  
 Weaver, R.A., 5179  
 Webb, G., 2003  
 Webb, I., P680  
 Webb, J., P4160  
 Weber, C., P1385, P2215, P3063  
 Weber, K., P2077  
 Weber, M., 282, P843, P1545, 1961, P2406, P3371, P3960  
 Weber, R., P5554  
 Weber, T., P1722  
 Wechalekar, A., 5057  
 Wechalekar, K., P831  
 Wedel, H., P4205, P5679, P5685, P5701  
 Weeke, P., P2299, P3130, P4684, P5442  
 Weekes, A., 1018  
 Weerackody, R.P., P4086, P4088  
 Weeramantiri, T., P3140  
 Wegscheider, K., P4261, P4836, P5408, P5724  
 Wehrens, X.H.T., P3380  
 Wei, H., P1570  
 Wei, M., P1393  
 Weichenhan, D., P3234, P3256  
 Weideman, M., P653  
 Weideman, R., P653  
 Weidemann, F., P2159, P2428, P3796, P3897, P5359  
 Weidemann, F.W., 2861, P4105  
 Weidenbach, M., P3050  
 Weidinger, F., P4704, P4715, P4736, 4993, 5151, P5280  
 Weidtmann, B., P815, P5621, P5690  
 Weig, H.J., P555, P1633, P2452, P4867  
 Weil, J., P2197, P5670  
 Weill, A., P1496  
 Weinberg, E., P5676  
 Weinert, S., P548, P4588  
 Weingartner, O., P4631  
 Waintraub, A., P4075  
 Waintraub, W., P4852  
 Waintraub, W.S., P4856  
 Weir, R.A.P., P821  
 Weisel, J., P5296  
 Weiss, C., P1618, P1630, P2444, P4505, P4874, P5399  
 Weiss, E., 5162  
 Weiss, G., P2335, P3252  
 Weiss, M., P2213  
 Weiss, S., 5137, P5265  
 Weiss, T.W., P2288  
 Weiss, U., P670  
 Weisse, U., P1646, P1665  
 Weissman, N., P4074  
 Weissman, N.J., 2933  
 Weitsman, T., P3841  
 Wei, L.P., P454  
 Welch, A.E., P4586  
 Weldon, E.R., P2994  
 Welge, D., P1268  
 Weller, A., 5140  
 Wellnhofer, E., P1524, P1525, P1533, P2435, P4762  
 Welten, G.M.J.M., P3987, P5524  
 Welz, A., P5483  
 Wenaweser, P., P2100, P3797  
 Wenaweser, P.M., P5256  
 Wendel-Vos, G.C.W., P3113  
 Weng, Y., 1004, 1005  
 Wensing, G., P1577  
 Wentworth, C., P5717  
 Wentzel, J., P3211, P4046  
 Wentzel, J.J., P3009, P3013, P4625, 4983  
 Wentzel-Larsen, T., 293, P3811  
 Wenzel, C.W., P709  
 Wenzel, D., 1247  
 Wenzel, P., P3957  
 Wenzelburger, F., 166, P1714, P3346, P4891, P4901  
 Werdan, K., P2408, P5655  
 Weretka, S., P555, P1633, P2452  
 Wergeland, R., P5606  
 Werle, M., P3019  
 Werner, C.M., P2266, 4971, P5373  
 Werner, G.S., P3019  
 Werner, K.-D., P4053  
 Werner, N., 382, P2188  
 Wess, A., P1704  
 West, J., P5538  
 West, M.J., P5538  
 West, R.M., 988, 1797  
 West, T.H., 1797  
 Westaby, S., 5070  
 Westenbergh, J.J.M., P700, P4546  
 Westenbrink, B.D., P854, P1413, P4875  
 Westenfeld, R., P5383  
 Westermann, C.J.J., P725, P737  
 Westermann, D., 1123, P1699  
 Westgren, M., P3071, P5556  
 Westheim, A., P5678  
 Westheim, A.S., P4230  
 Westphal, C.H., P3944  
 Westphal, K., P3955, 5140  
 Westwood, M.A., P1566, P3281  
 Wethal, T., P4634  
 Wettschureck, N., P1447  
 Wetzel, U., P764, P766, P2461, P4187, P4871  
 Weustink, A., P1285, P4129  
 Wever, E.F.D., P4823  
 Wexberg, P., 285, P1613, P3820, P3837  
 Weyand, M., P3951, P5569  
 Whabi, K., P2977  
 Whalley, G.A., P2167  
 Wheeler, S., P4513  
 White, H.D., P3850, 5210  
 White, M., P603, 1103, P2523, P4203, 5049  
 Whitehead, M., P4079  
 Whittom, L., P2523  
 Whybra, C., P3288  
 Whyte, G.P., 4973  
 Wibmer, T., P1614  
 Wicher-Muniak, E., P5328  
 Wichmann, H.E., P4689  
 Wichter, T., 2918, P3252  
 Wichterle, D., P3324, 5107  
 Wicks, E., P628, P3142, P4112

- Widder, J., P2214  
 Widhalm, K., P3004  
 Widimsky, P., P791, P1272, P2402, P3200, P3821, P4227, 4990, 5201  
 Widmann, T., 4971  
 Widmer-Teske, R., P550  
 Widschwendter, P., P4605  
 Wieczorek-Surdacka, E., P2958  
 Wiedemann, D., P2344  
 Wiedemann, S., P4502  
 Wiegand, G., P4780  
 Wiekowski, J., P3252  
 Wielckens, K., P5448  
 Wiemer, M., P4735  
 Wienbergen, H., P4512  
 Wienen, W., P2110  
 Wienke, A., 5006  
 Wiernek, B.K., P3218  
 Wiernek, S.L., P3218  
 Wierzbowska-Drabik, K., P1293, P1297  
 Wiesbauer, F., 1901, P3004  
 Wiesel, M.L., P1307, P1312  
 Wiesfeld, A.C.P., P2432  
 Wieteska, E., P2958  
 Wieteska, M., 5183  
 Wiitstein, I., P3290  
 Wijers, O., P4791  
 Wijesuriya, S., 1823  
 Wijffels, M.C.E.F., P4823  
 Wijnberg, H., P1595  
 Wijnmaalen, A.P., 1118, P3300  
 Wijns, W., P671, P1334, P1527, P1535, 3564, P4752  
 Wikstrand, J., 1100, P4205, P5679, P5685, P5701  
 Wikstrom, M., P4661  
 Wilck, N., P3955, P4599  
 Wilczek, K., P870, P2343, P5278  
 Wilczek, P., P3080  
 Wild, F., P3050  
 Wild, P.S., P1294, P1476, P3120  
 Wildberger, J., P3012  
 Wilde, A., 5120  
 Wilde, A.A.M., P3238, 3777, P4156, P4767  
 Wilde, P., 2004  
 Wilders, R., P3294  
 Wilhelm, B., 5131  
 Wilinski, J., P477, P872  
 Wilkens, H., P1604  
 Wilkie, T., P1447  
 Wilkinson, K.A., P5577  
 Wilkinson, P., P3844  
 Wilkinson, R.J., P5577  
 Wilkolek, P., 2005, 2009  
 Will, A., 1260, P4126  
 Will, R., P3234  
 Willems, R., P483, P4810  
 Willemsen, S., P4918  
 Willenbacher, N., P3373  
 Willenheimer, R., P5570  
 Williams, G., P5361  
 Williams, K., P1349, P1374, P3313  
 Williams, T., P3365  
 Williamson, R.M., P2102  
 Willich, C., P2345  
 Willich, S., P642  
 Willoughby, S., P1329  
 Willoughby, S.R., P2443  
 Wilsgaard, T., P5426  
 Wilson, D., P2424  
 Wilson, K., P4135  
 Wilson, M., 4973  
 Wilson, N., P2368  
 Windak, A., 983  
 Windecker, S., P2100, P2349, P3094, P3797, P4045, P5256  
 Winder, T., P1464, P2262  
 Windyga, J., P5562  
 Wink, D.A., P5406  
 Winkel, B.G., P775  
 Winkel, P., P1299  
 Winkel, T., P2170, P2509, 4947  
 Winkel, T.A., 156, 887, 1009, P1706, P2341, P2966, P3047, P4633, 5061, P5485, P5513  
 Winkelmann, B.R., P528  
 Winkens, B., P2981  
 Winkens, M., P3012  
 Winkens, M.H.M., P1375  
 Winter, M.M., P1381, P4782  
 Winter, S., 2680  
 Winterhalter, M., P1616  
 Wipplinger, R., P1586  
 Wirtwein, M., P4515  
 Wiseman, A.H., P4040  
 Wisloeff, U., P2945, P3802, P5707  
 Wisloff, U., P509, P3391, P3395, P3803, 4970, 5053, P5465  
 Wisse, L.J., P573  
 Wissner, E., P1644, P2429  
 Wita, K., P442, P2458  
 Withers, S.B., P3110  
 Witkowska, M., P4920  
 Witkowski, A., P1567, P3128, P3179, P3849, P5273, P5279, P5287, P5542  
 Witowski, J., P3964  
 Witte, K., 242  
 Witte, P., P2418  
 Wittenberg, O., P2967, P4729  
 Wittke, E., P4945  
 Wittrup-Jensen, K., P1470  
 Witzenbichler, B., P645, P1523, 5210  
 Wizimirski, M., 4955  
 Wlodyka, A., P4561, 5065  
 Wnuk-Wojnar, A.M., P2425, P4834  
 Wodlin, P., 2821  
 Woelken, M., 282, 1961  
 Woerner, A., P4063  
 Wohlert, C., 1128  
 Wohlfart, P., P5494  
 Wojakowski, W., P434, 1148, 1958, P3068, P3089, P3845, P3851, P5270, P5271, P5274  
 Wojciechowska, W., 163, P477, P4255  
 Wojciechowski, A., P707, P747  
 Wojcik, M., P3325  
 Wojnar, R., P3143, P5278  
 Wojta, J., P1619, P5376, P5405  
 Wojta, J.W., P709  
 Wojtkowska, I., P5300  
 Wolber, T., P2162  
 Wold, N., P5706  
 Wolf, B., P416  
 Wolf, J., P3139  
 Wolf, J.-E., P1716  
 Wolf, J.E., P618, P1373, P3847  
 Wolff, A., P2519  
 Wolff, A.A., P2512  
 Wolfrum, S., P3840  
 Wolfshaut, R., P2269  
 Wollaert, K., P4004, P5431  
 Wollert, K., P1294  
 Wollin, M.S., P5700  
 Wollmann, C.G., P3252  
 Wollmann, C.H., P2437  
 Wolny, M., 2016  
 Woloszyn, M., P5257  
 Wolpert, C., P1664, P1669, P3289, P3290, P3293, 5120, 5123  
 Wolzt, M., 345, P860, P2105  
 Wong, C., P5639  
 Wong, C.X., P2426, P2443, P3341, P5560  
 Wong, C.Y., P3153  
 Wong, D.T.L., P1349, P1374, P5308  
 Wong, J., P3269, 4973  
 Wong, J.M., P1488, 3529  
 Wong, L.S.M., 2765  
 Wong, N.C.W., P5422  
 Wong, N.D., P3116, P5478  
 Wong, R.C., P4580  
 Wong, S., P5612, P5619  
 Wong, T., P767  
 Woo, S.I., P5323  
 Wood, D., P594, 1795, P3114  
 Wood, N.B., P4618  
 Woodward, M., P5457  
 Woollard, K., P3942  
 Worasuwannarak, S., P3221  
 Worrall, A., P2089  
 Worrall, K., P3829  
 Worthley, M., P1329  
 Worthley, M.I., P1349, P1374, P5308  
 Worthley, S., P671  
 Worthley, S.G., P1349, P1374, P3085, P3313, P5308  
 Wos, S., 5240  
 Wozniak, A., P3230  
 Wozniak, J., P4859  
 Wozniak-Skowerska, I., P2425, P4834  
 Wraga, M., P5314  
 Wragg, A., P628, P3142, P4088, P4112  
 Wright, C., P3145  
 Wright, G.A., P3084  
 Wright, I., P2465  
 Wright, M., P1629, 3657, P4828  
 Wright, R.A., P5284  
 Wrobel, W., P3190, P3918  
 Wu, A., P823  
 Wu, C.K., P4008  
 Wu, C.T., P3203  
 Wu, D., P5717  
 Wu, H., P2258  
 Wu, H.-L., P2195  
 Wu, I.H., P703  
 Wu, J., P4845, 5100  
 Wu, J.-F., P5356  
 Wu, J.R., P1403  
 Wu, K., P405  
 Wu, M., P1342  
 Wu, M.C., P5718  
 Wu, M.H., P2367, P3149  
 Wu, T.C., P4529  
 Wu, Y., P2123  
 Wu Amen, L., P5492  
 Wulf, G., P588  
 Wunderlich, C., P3385, 5187  
 Wunderlich, N., 3655  
 Wuppinger, T., P4662  
 Wustmann, K., P2164, P4777  
 Wustrack, H., P2205  
 Wutzler, P., P3287  
 Wuyts, K., P2949, 4960, 4965  
 Wyffels, E., P1527, P1535  
 Wykrzykowska, J.J., P4045  
 Wyman, A., P5686  
 Wynn, G.J., P2515  
 Wyse, G., P2473  
 Wyss, C., P4562  
 Wyss, C.A., 396, 399, P3033  
 Wytenbach, R., P1372  
 Xaplanteris, P., 1020, P1292, P2185, P3171, P3405, P3915, P3937, P3973, P4686, P4935  
 Xhabija, N., P2976  
 Xi, J., P5572, P5583  
 Xi, Y., P3137, P3412  
 Xia, Y., P760, P1631  
 Xiao, X., P2420  
 Xiaomeng, Y., P1631  
 Xie, J., P475  
 Xie, Y.Q., P5574  
 Xin, P., P1393  
 Xin, Y., P1730  
 Xing, R., P4607  
 Xiong, J., P3954  
 Xu, B., P1570  
 Xu, D., 1923, P3308  
 Xu, H., 3780  
 Xu, M.T., P5718  
 Xu, X.Y., P4618  
 Xu, Y., P1738  
 Xu, Z., P3954  
 Xu, Z.H., 5105  
 Xu-Ming, Z., P2115  
 Xue, Q., P4055  
 Xue, S., P3308  
 Xue, Z., 2681  
 Xylomenos, G., P5587  
 Yabe, A., 2825  
 Yacoub, M., P2154  
 Yacoub, M.H., 1241, P2334, P2336  
 Yacid, M., P5380  
 Yagi, H., 2825  
 Yagi, T., P3818

- Yaguchi, I., P1548  
 Yaici, K., P769  
 Yajima, J., P4060  
 Yajima, K., P445, 1013, P3057, P3997, P4014  
 Yakubov, S.J., 3653  
 Yakushin, S.S., P2302  
 Yamada, A.T., P4172  
 Yamada, H., P1558, P4538, 4957  
 Yamada, J., 170, P4015, P4017, P4671, P5438  
 Yamada, R., P4520  
 Yamada, S., 5129, P5486, P5628  
 Yamada, T., P4070  
 Yamada, Y., 1013, P3057, P3997, P4014  
 Yamagishi, N., P3303  
 Yamagishi, S., P3303  
 Yamaguchi, I., 1923, P3323  
 Yamaguchi, K., P1558, P2248, P4538, 4957  
 Yamaguchi, T., P652, P656, 2934  
 Yamaji, K., 2642, P4568  
 Yamaji, M., P4262  
 Yamaji, T., P814  
 Yamaki, T., P3899, P4071  
 Yamamoto, E., P1491  
 Yamamoto, H., P668, P691, P1360, P4038  
 Yamamoto, H.Y., P3812  
 Yamamoto, K., P488, P3989, P4520, P4660, P4668  
 Yamamoto, M., P838, P3908, P4495, P5649  
 Yamamoto, T., P814, P1359, P4262  
 Yamanaka, A., P3871, P4019  
 Yamane, K., P5318  
 Yamane, T., 2676  
 Yamani, S., P2376  
 Yamasa, T., P1452  
 Yamasaki, H., P1625, P3301, P5649, P5652  
 Yamashina, A., 170, 400, 1024, P2280, P4011, P4015, P4017, P4573, P4671, P4707, P4747, P5438  
 Yamashiro, K., P4554  
 Yamashita, J., P4707  
 Yamashita, S., P4660, P4668  
 Yamato, M., P413  
 Yamauchi, M., P4756  
 Yamawaki, M., P3197  
 Yamazaki, J., P1520, P4065  
 Yamazaki, T., 2825  
 Yaminisharif, A., P490  
 Yamwong, S., P3335, P4655  
 Yan, B., P664  
 Yan, G.H., P478, P4672  
 Yan, L., P5718  
 Yanagi, S., P2487  
 Yandle, T.G., P541  
 Yang, D., P760, P1631, P2420  
 Yang, G.Z., P2388  
 Yang, H.M., P1380, P1553, P4016  
 Yang, L., P5356  
 Yang, M., P5305  
 Yang, S.F., 339  
 Yang, S.H., 5105  
 Yang, T.H., P4709  
 Yang, W., 5105  
 Yang, W.I., P4066  
 Yang, X., P3954  
 Yang, X.C., P4081  
 Yang, Y., P760, P1631, P2420  
 Yang, Y.Z., P5574, P5597  
 Yano, T., P1389, 5141  
 Yaqoob, M., P4112  
 Yarlioglu, M., P2533, P3362  
 Yarnell, J., P5443  
 Yasuda, K., P1331  
 Yasuda, N., P1288  
 Yasuda, S., P2478  
 Yasukochi, S., P2385  
 Yasumura, Y., P413, 3640  
 Yasunaga, H., 2007, P2362  
 Yasunaga, T., 1146, P1452, P4012  
 Yasuno, S., P3805  
 Yasutake, M., P1491  
 Yatomi, Y., P3867  
 Yavari, A., 249  
 Yaymaci, B., P1584  
 Yazar, A., P1530  
 Yazbeck, P., P4863  
 Yazici, M., P4268, P4468  
 Yazigi, A., P4863  
 Ye, G., P403  
 Ye, L., P3073, P5388  
 Ye, Y., P4882, 5231  
 Ye, Y.-X., P3025  
 Yebra-Yebra, M., P4235  
 Yegutkin, G.G., P4591  
 Yeh, J.-S., P4529  
 Yeh, J.L., P1403  
 Yeh, L.-C., P3145  
 Yellon, D.M., P1383, 3647  
 Yeo, T.C., P5459  
 Yeter, E., P5319  
 Yetgin, T., P3122  
 Yetis, B., P2237  
 Yeung, A.C., 4953  
 Yew, K.L., P3109, P4539  
 Yi, Y., P2371  
 Yildirim, E., P3182  
 Yildirimturk, O., P2303, 2860, P3334, 3638, P3909, P3910, P4090, P4635  
 Yildirir, A., P514  
 Yildiz, M., P2411, 2770  
 Yildiz, O., P2173, P5698  
 Yilmaz, A., P467, P4548, P4823, 5087, P5498  
 Yin, G.S., P5718  
 Yin, X., P760, P2420  
 Yin, Z., P454  
 Yip, A., 2769  
 Yip, G.W.K., P499, P664  
 Yip, H.K., P3100  
 Yip, T., P5481  
 Yiu, K.H., P478, P1482, P4556, P4565, P4672, 4968  
 Yla-Herttuala, S., P2192, P2203, P3388, P5389, P5391  
 Ylitalo, A., P682, P2438  
 Ymamoto, H., P690  
 Yndestad, A., P1674  
 Yokoe, H., P2127  
 Yokoi, H., 1900, 2642, P4568, P5519  
 Yokoi, K., P445, 1013, P3057, P3997, P4014  
 Yokota, M., 1127, P1361, P4250  
 Yonekawa, K., 387  
 Yonetsu, T., P1367, P3015  
 Yoneyama, K., P612, P4756  
 Yong, A., P677  
 Yong, Z.Y., 3569  
 Yonga, G., P2352  
 Yoon, H.J., P2142, P3216, P4184  
 Yoon, J., 2673  
 Yoon, J.H., P2091, 3558, P4648, P4651  
 Yoon, M.H., P1380, P1553, P4016  
 Yoon, N.S., P2436, P4152  
 Yoon, Y.E., 1258, P5629  
 Yorgun, H., P1353  
 Yormaz, E., 3568  
 Yoshida, H., P5479  
 Yoshida, K., P1537, 1923, P2405, P3869, 4986  
 Yoshida, M., 170, 1024, P2280, P4015, P4017, P4671, P5438  
 Yoshida, S., P3041  
 Yoshida, T., 1013, P3997, P4014  
 Yoshikawa, A., P633  
 Yoshikawa, J., P3871  
 Yoshikawa, T., P2964, P4499, 5143, P5486, P5665  
 Yoshimura, K., P3374, P4476  
 Yoshimura, M., 1021, P5479  
 Yoshino, H., P3374, P4476  
 Yoshino, N., P1517  
 Yoshino, S., P633  
 Yoshioka, K., P4180  
 Yoshitama, T., P4070  
 Yoshitani, H., P2181, 5092  
 Youn, Y.H.J., 5106  
 Youn, Y.J., P2091, 2673, 3558, P4648, P4651  
 Young, G., 1920  
 Young, G.D., P2426, P2443, P3341  
 Young, J.B., P2490  
 Younis, A., P4189  
 Yousef, Z., P2494  
 Yousef, Z.R., 5127, P5602, P5617, P5654  
 Yousef, I., P2294  
 Youssef, S.R., P1601  
 Yovetich, N.A., P1602  
 Yozu, R., P5486  
 Ypenburg, C., P4546, 5125  
 Ypey, D.L., P572  
 Ysamat, R., P5320  
 Yu, A., P1738  
 Yu, C.M., P499, P664, P2984, P3393  
 Yu, H., P1730  
 Yu, H.Y., P703  
 Yu, J., P3950  
 Yu, J.M., P3148  
 Yu, M., P651  
 Yu, W., 2820  
 Yu, W.-C., P3030  
 Yu, Y., P5574  
 Yuan, A., P1407  
 Yuan, S., P1621, P1643  
 Yuan, Z.Y., P2123  
 Yuasa, F., P2127  
 Yuasa, S., P3183  
 Yue, W.S., P478, P4672  
 Yucel, S., P4143  
 Yuen, C.M., P3100  
 Yumoto, Y., 3659  
 Yun, S.-C., P3198  
 Yusuf, S., 5081, P5619  
 Zabal, C., P2375  
 Zabeck, A., P2360, P2361  
 Zabel, M., P1657, P2428  
 Zaca, V., P4470  
 Zaccaria, M., P584  
 Zaccaro, L., P1408  
 Zachara, E., 5234  
 Zachariah, D., P3327, P3368, P5447  
 Zacharis, E., P4749, P5725  
 Zacharis, E.A., P829, P2252, P2257, P2259  
 Zacharzewsky, U., P761, 5218  
 Zacho, J., 2019  
 Zaddach, F., P4636  
 Zaehring, M., P2090  
 Zafiriou, M.P., P3075, P3078  
 Zafrir, N., P4585  
 Zagidullin, B., P4175  
 Zagidullin, N., P4175  
 Zagidullin, S.H., P4175  
 Zagodzdon, P., P4171  
 Zahger, D., P2086, P3194, P3941  
 Zahn, R., P1277, P2096, P2990, P2998, P3180, P4148, P4157, P4512, P4514, P4704, P4715, P4721, 4993, 4994, 5150, 5151, P5503, P5508, P5509  
 Zairis, M., P2962, P2986, P3163, P4031, P4218  
 Zajac, D., P1668  
 Zakareya, A., P4581  
 Zakher, R., 5093  
 Zakirova, A.N., P525  
 Zakja, E., P750, P3363  
 Zakopoulos, N., P2534, P4944  
 Zakrzewicz, A., P2221  
 Zakrzewska, J., P1661  
 Zaky, S.H., P798  
 Zalewski, J., P446, P3179, P3924, P5303  
 Zaltsberg, S., P1624, P3325  
 Zamora, J., P1662  
 Zamorano, J., 343, P491, P492, P1543, P2304, P2397, P2401, P3039, P4183, P4563, P5329  
 Zampelas, A., P1487  
 Zandler, S., P1385  
 Zanelli, E., P5471  
 Zanesco, A., P3806  
 Zangrillo, A., P4130, 5156  
 Zanini, R., P5268  
 Zaninotto, M., P3834  
 Zannad, F., P2477, P4203, P4536  
 Zannettino, A.C.W., P3085, P3313  
 Zanobetti, M., 236  
 Zanolla, L., P835, P1688  
 Zanon, F., P795  
 Zanutto, G., P1658  
 Zaravinos, A., P694  
 Zareba, K., P2394  
 Zareba, W., P1667, 2773, 2778

- Zaroui, A., P2141  
Zarqane, N., P769  
Zarse, M., P807  
Zartner, P.A., P2359  
Zaruba, M.-M., P3082  
Zaruba, M.M., 2915  
Zarza, A.C., P3037  
Zarzoso, M., P606  
Zatarain, E., P3051  
Zavalloni, D., P3217  
Zavoral, M., P1729  
Zawadzki, C., P5564  
Zbinden, S., P2190  
Zdrojewski, T., P3138, P3161  
Zebala, M., P870  
Zebik, T., P870, P5293  
Zecca, B., 151  
Zecchi, P., 5062, P5611  
Zechmeister, C., 5231  
Zehender, M., P405, P4142  
Zehetmayer, S., P3409  
Zeibekis, A., 1014, P1486, P3126  
Zeimbekis, A., 3539  
Zeinhom, F., P710  
Zelarayan, L., P3078  
Zelaryan, L., P3075  
Zell, R., P3287  
Zeller, G.C., P4594  
Zeller, M., P618, 1950, P3847, P3859, P5316  
Zeller, R., P3256  
Zeller, T., 984, P1294, P1476, P3120, 5051, P5518  
Zellerhoff, S., P4833  
Zellweger, M., P740  
Zemanek, D., P3219, P3240, P3283  
Zembala, M., P2307, P2343, P2393, P3080, P3143, P3849, 5240, P5273, P5279  
Zembala, M.O., P3080  
Zemir, H., 2869  
Zemtsovsky, E., P3267  
Zeng, Y., P5305  
Zenker, G., P4032, 4969  
Zeppenfeld, K., 1118, P1506, P3300, P4082, 4956  
Zerbo, F., 5217  
Zerm, T., P757, P2429  
Zerva, L., P5502  
Zervou, A., P4933  
Zeymer, U., 156, P595, P629, P1277, 1800, 1952, P2096, P2293, P2990, P2998, P3180, P4148, P4512, P4704, P4715, P4721, P4736, 4993, 4994, 5150, 5151, P5280, P5436, P5503, P5508, P5509  
Zhang, C.N., P1730  
Zhang, D.Y., P3148  
Zhang, F., P1534, 2927  
Zhang, J., P811, P845, P2371, P5388  
Zhang, L., P1570, P3954  
Zhang, M., P664, P2984, P3393  
Zhang, M.H., 1239  
Zhang, Q., P499, P664  
Zhang, Q.H., P664, P2984, P3393  
Zhang, S., P760, P1631, P2420, P5718  
Zhang, S.M., P5445  
Zhang, W., 152, P2258, P5388  
Zhang, W.P., P2123  
Zhang, X., P3328  
Zhang, X.H., P800, P808, P4503, P4739  
Zhang, Y., P3397, P4055, P5572, P5583, P5706  
Zhang, Y.H., 1239  
Zhao, L., P2371, P5572, P5583  
Zhao, M., P4053  
Zhao, Y.X., P651  
Zhao, Z.Q., P4081  
Zhen, Q., P3014  
Zhen, Z., P2420  
Zheng, M., P1380, P4016  
Zheng, M.Z., P1553  
Zheng, Q., P4607  
Zhong, L., P2177  
Zhou, D.X., P2363  
Zhou, L., P4595  
Zhou, X., P2258  
Zhou, Y.J., P651  
Zhu, D., P3397  
Zhu, Q., 398  
Zhu, T.G., P499  
Zhu, W., P1393  
Zhu, W.L., P5305  
Zhuravleva, S.V., P855  
Zi, M., P3384  
Ziacchi, M., P5618  
Ziakas, A., P3936  
Ziani, A., P4740  
Zichici, E., P2953  
Ziegelmeier, W., 4969  
Ziegler, H., P3079  
Ziegler, M., P5705  
Zielen, P., P5542  
Zielinska, T., P440, P2963  
Zielinska-Meus, A., P440  
Zielinski, M., P3190  
Zielinski, T., P593, P2511  
Ziemer, S., P2099  
Zierath, J., P605  
Zierden, M., P4595  
Zierer, A., 132, P4669  
Zietkiewicz, Z., P1320  
Zigriades, E., P3798  
Zijlstra, F., P1303, P3098, P3101  
Zilberszac, R., 5164  
Zile, M.R., 5041, 5049  
Zima, E., P3309, P5615, P5626  
Zimarino, M., P654, P1478, P2231, P4050, P4937  
Zimmer, A., P5371  
Zimmer, S., P4600, P5371, P5402  
Zimmermann, A.V., P5655  
Zimmermann, M., P3332  
Zimmermann, O., P416  
Zimmermann, W.H., P4595  
Zimmet, H., 1097  
Zincarelli, C., P819  
Zini, R., P1384  
Zinzius, P.Y., P1645, P3314, P4170  
Ziolkowska, L., P1433, P4783, P5590  
Zirlik, A., P5375  
Zirlik, K., P5375  
Zito, C., P4473  
Zmudka, K., P446, P3179, P4480, P5303, P5504, P5510, P5537  
Znazen, A., P4121  
Zobel, C., P561  
Zobrist, C., P2414, P5256  
Zoccali, C., P3406  
Zoellner, S., P545  
Zoergiebel, T., P4587  
Zoga, A., P1484  
Zoghi, M., P581  
Zolindaki, M., P5251  
Zoll, J., P1676, P2328, P3392  
Zomer, E., 979, 986  
Zona, S., P4571  
Zonzin, P., P735, 5188  
Zoppi, A., P1737, P4839  
Zoppo, F., 5217  
Zorn, G., P1619  
Zornoff, L.A., P1673  
Zornoff, L.A.M., P1702, P1708  
Zoroufian, A., P490  
Zorzi, A., 1115  
Zorzi, E., P1300, P4806, P5477  
Zoschke, J., P1533, P4762  
Zou, J., P3308  
Zou, Y.O.N.G., P4138  
Zou, Y.Z., P5574  
Zoulia, V., P5298  
Zouwail, S., 2870  
Zucca, F., P1493  
Zuccarelli, A., P2080  
Zuccaro, L., 5222  
Zuccaro, L.M., P4146, P4826  
Zucchelli, G., P2358, P5651  
Zuchi, C., P4688  
Zuern, C.S., P695, 2680  
Zugck, C., P636, 2768, P3256  
Zujun, S., P1509  
Zulkarneev, R., P4175  
Zupan, M., 5069  
Zureik, M., 133  
Zurro, M., P1478  
Zwaan, E.G., P2440, P3053  
Zwas, D., P4236, P4246  
Zwas, D.R., P4260  
Zwick, N., P2946  
Zwisler, A.D.O., 1826, P3170  
Zwissler, B., P4566  
Zylkowska, J., 5183  
Zyw, L., P827, P4553
